# Supplementary material for: Identification and Characterization of lncRNAs Expression Profile Related to Goat Skeletal Muscle at Different Development Stages
Source: Animals (Basel). 2022 Oct 6;12(19):2683. doi: 10.3390/ani12192683 (PMC9558979; doi:10.3390/ani12192683)
Supplement: Supplementary file 1 [file animals-12-02683-s001.zip]

Archive with 12 entries (12 files):
- Supplementary FigureS1.pdf
- Supplementary FigureS2.pdf
- Supplementary TableS1.xls
- Supplementary TableS10.xlsx
- Supplementary TableS2.xls
- Supplementary TableS3.xlsx
- Supplementary TableS4.xls
- Supplementary TableS5.xls
- Supplementary TableS6.xls
- Supplementary TableS7.xls
- Supplementary TableS8.xlsx
- Supplementary TableS9.xlsx
