# Supplementary material for: Identification and Characterization of lncRNAs Expression Profile Related to Goat Skeletal Muscle at Different Development Stages
Source: Animals (Basel). 2022 Oct 6;12(19):2683. doi: 10.3390/ani12192683 (PMC9558979; doi:10.3390/ani12192683)
Supplement: Supplementary file 1 [file animals-12-02683-s001.zip › Supplementary TableS1.xls]

## Sheet: Table S1
Table S1 The information of RNA-seq data
Sample name	mon1_1	mon1_2	mon1_3	mon9_1	mon9_2	mon9_3
Total reads	97036650	101986738	97525086	96645866	88937344	101082860
Total mapped	92589572 (95.42%)	96009212 (94.14%)	92493379 (94.84%)	91960875 (95.15%)	84693210 (95.23%)	88003580 (87.06%)
Multiple mapped	12203522 (12.58%)	13936127 (13.66%)	13823081 (14.17%)	9574161 (9.91%)	11765799 (13.23%)	14748330 (14.59%)
Uniquely mapped	80386050 (82.84%)	82073085 (80.47%)	78670298 (80.67%)	82386714 (85.25%)	72927411 (82%)	73255250 (72.47%)
Read-1	40246229 (41.48%)	41100995 (40.3%)	39504265 (40.51%)	41216180 (42.65%)	36504002 (41.04%)	36718930 (36.33%)
Read-2	40139821 (41.37%)	40972090 (40.17%)	39166033 (40.16%)	41170534 (42.6%)	36423409 (40.95%)	36536320 (36.14%)
Reads map to '+'	40146824 (41.37%)	40989578 (40.19%)	39286722 (40.28%)	41136068 (42.56%)	36409203 (40.94%)	36559115 (36.17%)
Reads map to '-'	40239226 (41.47%)	41083507 (40.28%)	39383576 (40.38%)	41250646 (42.68%)	36518208 (41.06%)	36696135 (36.3%)
Non-splice reads	50997188 (52.55%)	50392743 (49.41%)	51087905 (52.38%)	55014850 (56.92%)	44941530 (50.53%)	50629093 (50.09%)
Splice reads	29388862 (30.29%)	31680342 (31.06%)	27582393 (28.28%)	27371864 (28.32%)	27985881 (31.47%)	22626157 (22.38%)
Reads mapped in proper pairs	78436300 (80.83%)	80074292 (78.51%)	76586880 (78.53%)	80398734 (83.19%)	71056222 (79.89%)	71227988 (70.46%)
Proper-paired reads map to different chrom	0 (0%)	0 (0%)	0 (0%)	0 (0%)	0 (0%)	0 (0%)
