# Supplementary material for: Identification and Characterization of lncRNAs Expression Profile Related to Goat Skeletal Muscle at Different Development Stages
Source: Animals (Basel). 2022 Oct 6;12(19):2683. doi: 10.3390/ani12192683 (PMC9558979; doi:10.3390/ani12192683)
Supplement: Supplementary file 1 [file animals-12-02683-s001.zip › Supplementary TableS2.xls]

## Sheet: Novel_lncRNA_information
Table S2. List of lncRNAs identified in the goat skeletal muscle libraries.
Novel_lncRNA_ID	Novel_lncRNA_Gene_ID	Novel_lncRNA_Gene_Name	Gene_Type	Status	Chromosome	Start	End	Strand	Exon_number	Length	ORF
TCONS_00000058	102191552	IFNAR1	protein_coding	Novel_lncRNA	Chr 1	632282	633046	+	2	216	72
TCONS_00000059	102191552	IFNAR1	protein_coding	Novel_lncRNA	Chr 1	652404	654905	+	2	2376	286
TCONS_00000109	XLOC_000051	XLOC_000051	novel	Novel_lncRNA	Chr 1	1545680	1548825	+	2	952	182
TCONS_00000125	102169904	SCAF4	protein_coding	Novel_lncRNA	Chr 1	2236893	2259741	+	2	2035	152
TCONS_00000194	XLOC_000109	XLOC_000109	novel	Novel_lncRNA	Chr 1	5834220	5835626	+	2	320	73
TCONS_00000386	102186052	GBE1	protein_coding	Novel_lncRNA	Chr 1	28005798	28068323	+	2	369	78
TCONS_00000390	102186519	CADM2	protein_coding	Novel_lncRNA	Chr 1	31602511	31603989	+	3	861	176
TCONS_00000445	XLOC_000294	XLOC_000294	novel	Novel_lncRNA	Chr 1	40959924	40960333	+	2	207	61
TCONS_00000466	XLOC_000311	XLOC_000311	novel	Novel_lncRNA	Chr 1	41546799	41548013	+	2	212	70
TCONS_00000491	102173504	LOC102173504	protein_coding	Novel_lncRNA	Chr 1	42328786	42370114	+	3	268	55
TCONS_00000541	102176560	FILIP1L	protein_coding	Novel_lncRNA	Chr 1	44121361	44200728	+	2	1717	146
TCONS_00000691	XLOC_000444	XLOC_000444	novel	Novel_lncRNA	Chr 1	52728110	52729227	+	2	294	79
TCONS_00000731	XLOC_000460	XLOC_000460	novel	Novel_lncRNA	Chr 1	55822219	55829894	+	2	7654	227
TCONS_00000775	102181162	CD200	protein_coding	Novel_lncRNA	Chr 1	56867463	56868671	+	2	991	165
TCONS_00000837	XLOC_000521	XLOC_000521	novel	Novel_lncRNA	Chr 1	58162874	58165158	+	2	871	75
TCONS_00000838	XLOC_000521	XLOC_000521	novel	Novel_lncRNA	Chr 1	58162990	58163643	+	2	448	82
TCONS_00000839	102186053	ATP6V1A	protein_coding	Novel_lncRNA	Chr 1	58171849	58207421	+	5	8096	176
TCONS_00000879	XLOC_000547	XLOC_000547	novel	Novel_lncRNA	Chr 1	61350159	61396388	+	2	227	61
TCONS_00000892	102191273	POGLUT1	protein_coding	Novel_lncRNA	Chr 1	63950730	63952141	+	3	667	110
TCONS_00000952	102171379	LRRC58	protein_coding	Novel_lncRNA	Chr 1	64765141	64793936	+	2	11671	254
TCONS_00001088	102173333	LOC102173333	protein_coding	Novel_lncRNA	Chr 1	68208537	68342983	+	2	2709	164
TCONS_00001098	XLOC_000700	XLOC_000700	novel	Novel_lncRNA	Chr 1	68763326	68763896	+	2	438	85
TCONS_00001155	102174979	MUC4	protein_coding	Novel_lncRNA	Chr 1	70259634	70286531	+	4	812	157
TCONS_00001156	102174979	MUC4	protein_coding	Novel_lncRNA	Chr 1	70259762	70286531	+	3	618	108
TCONS_00001210	XLOC_000768	XLOC_000768	novel	Novel_lncRNA	Chr 1	71823597	71827384	+	2	1389	119
TCONS_00001212	XLOC_000768	XLOC_000768	novel	Novel_lncRNA	Chr 1	71826300	71827384	+	2	725	86
TCONS_00001226	102176644	ACAP2	protein_coding	Novel_lncRNA	Chr 1	71889654	71891129	+	2	675	129
TCONS_00001287	XLOC_000821	XLOC_000821	novel	Novel_lncRNA	Chr 1	73279212	73283476	+	2	283	94
TCONS_00001348	102189992	P3H2	protein_coding	Novel_lncRNA	Chr 1	77058900	77065037	+	2	569	74
TCONS_00001355	102168301	TPRG1	protein_coding	Novel_lncRNA	Chr 1	77880058	77898209	+	2	324	68
TCONS_00001356	102168301	TPRG1	protein_coding	Novel_lncRNA	Chr 1	77880058	77903566	+	3	487	91
TCONS_00001423	102171378	MASP1	protein_coding	Novel_lncRNA	Chr 1	79766413	79769004	+	2	612	131
TCONS_00001438	102176730	TBCCD1	protein_coding	Novel_lncRNA	Chr 1	80303573	80323038	+	11	2066	379
TCONS_00001673	102168667	KCNMB3	protein_coding	Novel_lncRNA	Chr 1	87430009	87446859	+	6	5479	487
TCONS_00001676	102168667	KCNMB3	protein_coding	Novel_lncRNA	Chr 1	87433240	87446859	+	7	2331	482
TCONS_00001734	XLOC_001096	XLOC_001096	novel	Novel_lncRNA	Chr 1	89894291	89894675	+	2	309	76
TCONS_00001755	102172575	ECT2	protein_coding	Novel_lncRNA	Chr 1	94259608	94264237	+	2	227	49
TCONS_00001824	102178016	SKIL	protein_coding	Novel_lncRNA	Chr 1	96587525	96596498	+	2	1558	375
TCONS_00001867	XLOC_001167	XLOC_001167	novel	Novel_lncRNA	Chr 1	98097603	98124694	+	2	209	69
TCONS_00001953	102175165	IFT80	protein_coding	Novel_lncRNA	Chr 1	106612851	106628911	+	4	509	123
TCONS_00001973	102180704	LOC102180704	protein_coding	Novel_lncRNA	Chr 1	107232619	107247594	+	2	1502	95
TCONS_00002130	XLOC_001352	XLOC_001352	novel	Novel_lncRNA	Chr 1	114499728	114500407	+	2	332	54
TCONS_00002156	XLOC_001368	XLOC_001368	novel	Novel_lncRNA	Chr 1	115204182	115233594	+	2	223	68
TCONS_00002228	102182832	TSC22D2	protein_coding	Novel_lncRNA	Chr 1	117292509	117343194	+	2	5753	284
TCONS_00002287	102172487	CP	protein_coding	Novel_lncRNA	Chr 1	118592114	118612683	+	10	2289	537
TCONS_00002303	102174163	AGTR1	protein_coding	Novel_lncRNA	Chr 1	119058674	119076609	+	2	281	77
TCONS_00002359	102186724	C1H3orf58	protein_coding	Novel_lncRNA	Chr 1	124463982	124479920	+	3	4177	373
TCONS_00002441	102188357	ATP1B3	protein_coding	Novel_lncRNA	Chr 1	126583053	126608438	+	2	817	190
TCONS_00002442	102188357	ATP1B3	protein_coding	Novel_lncRNA	Chr 1	126593356	126608438	+	3	774	120
TCONS_00002443	102188357	ATP1B3	protein_coding	Novel_lncRNA	Chr 1	126594736	126608438	+	2	490	121
TCONS_00002445	XLOC_001574	XLOC_001574	novel	Novel_lncRNA	Chr 1	126608701	126609648	+	2	834	65
TCONS_00002550	108636376	LOC108636376	protein_coding	Novel_lncRNA	Chr 1	131814291	131885556	+	4	2624	378
TCONS_00002551	108636376	LOC108636376	protein_coding	Novel_lncRNA	Chr 1	131814291	131898826	+	5	3447	378
TCONS_00002556	102190736	STAG1	protein_coding	Novel_lncRNA	Chr 1	131997476	132044612	+	2	412	52
TCONS_00002679	XLOC_001728	XLOC_001728	novel	Novel_lncRNA	Chr 1	139082338	139088290	+	2	1374	123
TCONS_00002699	102187812	BACE2	protein_coding	Novel_lncRNA	Chr 1	141049820	141056652	+	2	6685	148
TCONS_00002731	102191087	SLC37A1	protein_coding	Novel_lncRNA	Chr 1	142454361	142456016	+	2	1202	175
TCONS_00003066	XLOC_001983	XLOC_001983	novel	Novel_lncRNA	Chr 1	149111175	149115441	+	2	246	51
TCONS_00003074	102174881	TTC3	protein_coding	Novel_lncRNA	Chr 1	149193226	149199644	+	2	3289	139
TCONS_00003136	XLOC_002028	XLOC_002028	novel	Novel_lncRNA	Chr 1	151256219	151259772	+	2	3533	140
TCONS_00003148	102177934	LOC102177934	protein_coding	Novel_lncRNA	Chr 1	151392149	151418337	+	2	226	38
TCONS_00003275	XLOC_002108	XLOC_002108	novel	Novel_lncRNA	Chr 1	155746017	155754600	+	2	1086	98
TCONS_00003276	XLOC_002109	XLOC_002109	novel	Novel_lncRNA	Chr 1	155935199	155949099	+	4	296	61
TCONS_00003280	XLOC_002113	XLOC_002113	novel	Novel_lncRNA	Chr 1	157007017	157008237	+	2	326	90
TCONS_00003284	102184099	PP2D1	protein_coding	Novel_lncRNA	Chr 1	157055375	157085445	+	3	2828	241
TCONS_00003316	102171916	ITSN1	protein_coding	Novel_lncRNA	Chr 1	297709	333854	-	2	1794	124
TCONS_00003319	102171097	CRYZL1	protein_coding	Novel_lncRNA	Chr 1	364772	369600	-	3	736	67
TCONS_00003411	XLOC_002204	XLOC_002204	novel	Novel_lncRNA	Chr 1	5089236	5158938	-	2	6433	126
TCONS_00003414	XLOC_002207	XLOC_002207	novel	Novel_lncRNA	Chr 1	5127493	5134537	-	2	2443	116
TCONS_00003417	XLOC_002204	XLOC_002204	novel	Novel_lncRNA	Chr 1	5144094	5153489	-	2	6496	159
TCONS_00003546	XLOC_002308	XLOC_002308	novel	Novel_lncRNA	Chr 1	17660046	17745501	-	2	3757	92
TCONS_00003653	XLOC_002387	XLOC_002387	novel	Novel_lncRNA	Chr 1	19987707	20000503	-	2	279	75
TCONS_00003766	102191554	STX19	protein_coding	Novel_lncRNA	Chr 1	37039745	37119718	-	10	1974	447
TCONS_00003801	XLOC_002498	XLOC_002498	novel	Novel_lncRNA	Chr 1	41678002	41697081	-	3	17526	177
TCONS_00003803	XLOC_002498	XLOC_002498	novel	Novel_lncRNA	Chr 1	41682971	41687739	-	2	2611	152
TCONS_00003804	102170087	MRPS6	protein_coding	Novel_lncRNA	Chr 1	41697455	41700933	-	2	2408	146
TCONS_00003832	102169054	DCBLD2	protein_coding	Novel_lncRNA	Chr 1	42800631	42890524	-	13	6949	350
TCONS_00003851	XLOC_002535	XLOC_002535	novel	Novel_lncRNA	Chr 1	43564713	43590383	-	3	231	76
TCONS_00003870	102176560	FILIP1L	protein_coding	Novel_lncRNA	Chr 1	44007231	44200492	-	2	5580	152
TCONS_00004142	102174975	ZBTB20	protein_coding	Novel_lncRNA	Chr 1	58719511	58775961	-	2	31190	176
TCONS_00004221	XLOC_002757	XLOC_002757	novel	Novel_lncRNA	Chr 1	64091706	64093872	-	2	1269	77
TCONS_00004223	102169628	POPDC2	protein_coding	Novel_lncRNA	Chr 1	64106246	64109984	-	2	2644	118
TCONS_00004262	102178665	RABL3	protein_coding	Novel_lncRNA	Chr 1	65079237	65117097	-	6	1719	93
TCONS_00004353	XLOC_002832	XLOC_002832	novel	Novel_lncRNA	Chr 1	67994446	68041641	-	2	292	97
TCONS_00004362	102173333	LOC102173333	protein_coding	Novel_lncRNA	Chr 1	68208205	68341096	-	2	1154	261
TCONS_00004528	102175990	NRROS	protein_coding	Novel_lncRNA	Chr 1	70890466	70909908	-	2	283	86
TCONS_00004572	102178485	DLG1	protein_coding	Novel_lncRNA	Chr 1	71319567	71331394	-	2	480	159
TCONS_00004679	102189992	P3H2	protein_coding	Novel_lncRNA	Chr 1	76995297	77064704	-	4	390	64
TCONS_00004680	102189992	P3H2	protein_coding	Novel_lncRNA	Chr 1	77005198	77064709	-	3	591	47
TCONS_00004681	102189992	P3H2	protein_coding	Novel_lncRNA	Chr 1	77026924	77064693	-	2	275	51
TCONS_00004682	102189992	P3H2	protein_coding	Novel_lncRNA	Chr 1	77058697	77064698	-	2	433	102
TCONS_00004699	102190550	TP63	protein_coding	Novel_lncRNA	Chr 1	77392419	77467594	-	2	529	109
TCONS_00004705	102168301	TPRG1	protein_coding	Novel_lncRNA	Chr 1	77880058	77903358	-	3	279	77
TCONS_00004753	102168579	LPP	protein_coding	Novel_lncRNA	Chr 1	78774440	78901702	-	3	851	73
TCONS_00004783	XLOC_003080	XLOC_003080	novel	Novel_lncRNA	Chr 1	79523148	79538237	-	2	282	45
TCONS_00004811	XLOC_003097	XLOC_003097	novel	Novel_lncRNA	Chr 1	80115980	80116444	-	2	407	108
TCONS_00004850	102179984	SENP2	protein_coding	Novel_lncRNA	Chr 1	81204461	81255234	-	14	13684	521
TCONS_00004864	102178859	MAP3K13	protein_coding	Novel_lncRNA	Chr 1	81527941	81533252	-	2	2807	86
TCONS_00005027	XLOC_003224	XLOC_003224	novel	Novel_lncRNA	Chr 1	85094797	85111684	-	4	324	92
TCONS_00005042	XLOC_003239	XLOC_003239	novel	Novel_lncRNA	Chr 1	85740888	85751152	-	4	829	125
TCONS_00005111	XLOC_003282	XLOC_003282	novel	Novel_lncRNA	Chr 1	88762504	88813187	-	3	227	49
TCONS_00005149	102170637	NAALADL2	protein_coding	Novel_lncRNA	Chr 1	92017159	92518065	-	4	2684	114
TCONS_00005150	102170637	NAALADL2	protein_coding	Novel_lncRNA	Chr 1	92308194	92518065	-	3	506	81
TCONS_00005174	102173335	TNFSF10	protein_coding	Novel_lncRNA	Chr 1	94562382	94566432	-	2	2924	117
TCONS_00005207	XLOC_003353	XLOC_003353	novel	Novel_lncRNA	Chr 1	96241826	96243523	-	2	228	75
TCONS_00005235	102179323	GPR160	protein_coding	Novel_lncRNA	Chr 1	96849645	96876644	-	3	368	122
TCONS_00005236	102179323	GPR160	protein_coding	Novel_lncRNA	Chr 1	96849645	96876671	-	3	390	130
TCONS_00005333	XLOC_003442	XLOC_003442	novel	Novel_lncRNA	Chr 1	106371531	106390264	-	3	503	91
TCONS_00005419	102178213	SHOX2	protein_coding	Novel_lncRNA	Chr 1	108978099	108980557	-	2	269	89
TCONS_00005455	102177284	LEKR1	protein_coding	Novel_lncRNA	Chr 1	110278281	110346472	-	3	786	92
TCONS_00005456	102177284	LEKR1	protein_coding	Novel_lncRNA	Chr 1	110278281	110349434	-	3	747	92
TCONS_00005554	XLOC_003619	XLOC_003619	novel	Novel_lncRNA	Chr 1	114495260	114500408	-	2	4846	148
TCONS_00005556	XLOC_003619	XLOC_003619	novel	Novel_lncRNA	Chr 1	114495260	114500525	-	2	4918	148
TCONS_00005557	XLOC_003620	XLOC_003620	novel	Novel_lncRNA	Chr 1	114506976	114529872	-	2	339	95
TCONS_00005563	102186247	P2RY1	protein_coding	Novel_lncRNA	Chr 1	114567590	114574104	-	3	3579	162
TCONS_00005568	XLOC_003629	XLOC_003629	novel	Novel_lncRNA	Chr 1	114841206	114890231	-	2	501	87
TCONS_00005618	108636081	LOC108636081	protein_coding	Novel_lncRNA	Chr 1	116180524	116186356	-	2	564	97
TCONS_00005827	102174980	ZIC1	protein_coding	Novel_lncRNA	Chr 1	120491715	120521389	-	2	24285	224
TCONS_00005967	102181901	ZBTB38	protein_coding	Novel_lncRNA	Chr 1	127117581	127135623	-	3	3825	104
TCONS_00005969	XLOC_003916	XLOC_003916	novel	Novel_lncRNA	Chr 1	127194749	127201589	-	2	270	57
TCONS_00005995	102183641	NMNAT3	protein_coding	Novel_lncRNA	Chr 1	128946731	128961212	-	2	364	99
TCONS_00006096	102169426	KY	protein_coding	Novel_lncRNA	Chr 1	134264754	134274551	-	2	9229	208
TCONS_00006165	102173693	ACKR4	protein_coding	Novel_lncRNA	Chr 1	136558683	136651672	-	18	2337	667
TCONS_00006233	XLOC_004071	XLOC_004071	novel	Novel_lncRNA	Chr 1	141191474	141193253	-	4	570	94
TCONS_00006237	102188635	MX1	protein_coding	Novel_lncRNA	Chr 1	141239181	141242397	-	2	965	142
TCONS_00006317	XLOC_004131	XLOC_004131	novel	Novel_lncRNA	Chr 1	142977684	142979196	-	2	281	66
TCONS_00006338	102168584	RRP1B	protein_coding	Novel_lncRNA	Chr 1	143324431	143327169	-	2	533	111
TCONS_00006385	XLOC_004180	XLOC_004180	novel	Novel_lncRNA	Chr 1	143988133	144190350	-	2	257	85
TCONS_00006398	108636542	LOC108636542	protein_coding	Novel_lncRNA	Chr 1	144206215	144214363	-	2	424	83
TCONS_00006400	108636542	LOC108636542	protein_coding	Novel_lncRNA	Chr 1	144206886	144215804	-	2	1198	106
TCONS_00006402	108636378	LOC108636378	protein_coding	Novel_lncRNA	Chr 1	144211747	144219716	-	2	203	62
TCONS_00006410	102188261	C1H21orf2	protein_coding	Novel_lncRNA	Chr 1	144259451	144267296	-	5	977	169
TCONS_00006468	XLOC_004242	XLOC_004242	novel	Novel_lncRNA	Chr 1	144891975	144892839	-	2	306	68
TCONS_00006497	XLOC_004260	XLOC_004260	novel	Novel_lncRNA	Chr 1	145707239	145713916	-	2	2134	105
TCONS_00006622	XLOC_004364	XLOC_004364	novel	Novel_lncRNA	Chr 1	147140781	147142318	-	2	1384	176
TCONS_00006675	102179989	RIPPLY3	protein_coding	Novel_lncRNA	Chr 1	149110993	149154307	-	3	468	97
TCONS_00006687	XLOC_004406	XLOC_004406	novel	Novel_lncRNA	Chr 1	149324020	149330558	-	2	1058	127
TCONS_00006695	XLOC_004413	XLOC_004413	novel	Novel_lncRNA	Chr 1	149432955	149434735	-	2	843	110
TCONS_00006696	108636384	LOC108636384	protein_coding	Novel_lncRNA	Chr 1	149441571	149586936	-	12	6271	766
TCONS_00006699	108636384	LOC108636384	protein_coding	Novel_lncRNA	Chr 1	149441571	149586936	-	12	6244	757
TCONS_00006731	102177198	ERG	protein_coding	Novel_lncRNA	Chr 1	150687616	150693777	-	2	5855	136
TCONS_00006761	XLOC_004466	XLOC_004466	novel	Novel_lncRNA	Chr 1	151250857	151253321	-	2	2037	122
TCONS_00006846	XLOC_004519	XLOC_004519	novel	Novel_lncRNA	Chr 1	153641180	153649504	-	2	7784	192
TCONS_00006881	XLOC_004540	XLOC_004540	novel	Novel_lncRNA	Chr 1	157006663	157008263	-	2	706	104
TCONS_00059393	XLOC_037782	XLOC_037782	novel	Novel_lncRNA	Chr 10	504498	520413	+	2	878	121
TCONS_00059442	102190793	TTC7B	protein_coding	Novel_lncRNA	Chr 10	969589	989370	+	2	1539	101
TCONS_00059461	102190524	NRDE2	protein_coding	Novel_lncRNA	Chr 10	1295119	1307954	+	2	944	108
TCONS_00059499	XLOC_037856	XLOC_037856	novel	Novel_lncRNA	Chr 10	2419343	2420867	+	2	349	86
TCONS_00059500	XLOC_037856	XLOC_037856	novel	Novel_lncRNA	Chr 10	2419411	2420867	+	2	380	79
TCONS_00059546	102182044	FLRT2	protein_coding	Novel_lncRNA	Chr 10	5888878	5995653	+	2	7458	687
TCONS_00059559	XLOC_037886	XLOC_037886	novel	Novel_lncRNA	Chr 10	6688215	6795847	+	2	818	75
TCONS_00059634	102175408	STON2	protein_coding	Novel_lncRNA	Chr 10	10362618	10372856	+	3	1055	90
TCONS_00059695	102179571	DIO2	protein_coding	Novel_lncRNA	Chr 10	11607902	11623676	+	2	975	96
TCONS_00059724	XLOC_038027	XLOC_038027	novel	Novel_lncRNA	Chr 10	14465626	14468499	+	2	1959	210
TCONS_00059763	XLOC_038060	XLOC_038060	novel	Novel_lncRNA	Chr 10	15064871	15127512	+	4	3453	178
TCONS_00059771	XLOC_038060	XLOC_038060	novel	Novel_lncRNA	Chr 10	15095784	15127512	+	3	3360	178
TCONS_00059968	102184912	LOC102184912	protein_coding	Novel_lncRNA	Chr 10	18074614	18081930	+	2	294	97
TCONS_00059976	102184157	HEATR4	protein_coding	Novel_lncRNA	Chr 10	18173207	18188441	+	2	632	167
TCONS_00059977	102183334	NUMB	protein_coding	Novel_lncRNA	Chr 10	18209217	18280113	+	3	584	126
TCONS_00060056	102178455	SYNJ2BP	protein_coding	Novel_lncRNA	Chr 10	21107348	21122137	+	2	594	96
TCONS_00060058	102178455	SYNJ2BP	protein_coding	Novel_lncRNA	Chr 10	21107348	21153298	+	3	9005	153
TCONS_00060077	102177168	SLC10A1	protein_coding	Novel_lncRNA	Chr 10	21581458	21617809	+	8	5055	234
TCONS_00060078	102177168	SLC10A1	protein_coding	Novel_lncRNA	Chr 10	21583501	21617809	+	9	1296	276
TCONS_00060081	102177168	SLC10A1	protein_coding	Novel_lncRNA	Chr 10	21602980	21617809	+	8	11380	276
TCONS_00060082	102177168	SLC10A1	protein_coding	Novel_lncRNA	Chr 10	21602980	21617809	+	8	11255	276
TCONS_00060171	XLOC_038321	XLOC_038321	novel	Novel_lncRNA	Chr 10	22838277	22841594	+	2	1667	148
TCONS_00060182	102171883	RDH11	protein_coding	Novel_lncRNA	Chr 10	23590585	23591647	+	2	566	150
TCONS_00060212	108636955	LOC108636955	protein_coding	Novel_lncRNA	Chr 10	24606754	24609030	+	2	1368	89
TCONS_00060244	XLOC_038362	XLOC_038362	novel	Novel_lncRNA	Chr 10	26440016	26441602	+	2	388	55
TCONS_00060261	102185658	ZBTB25	protein_coding	Novel_lncRNA	Chr 10	26511425	26514903	+	2	1754	154
TCONS_00060288	102183521	WDR89	protein_coding	Novel_lncRNA	Chr 10	27228084	27252437	+	3	2252	125
TCONS_00060343	XLOC_038428	XLOC_038428	novel	Novel_lncRNA	Chr 10	30360840	30362752	+	2	1822	143
TCONS_00060349	102178078	SIX6	protein_coding	Novel_lncRNA	Chr 10	30381650	30497368	+	3	585	118
TCONS_00060372	XLOC_038456	XLOC_038456	novel	Novel_lncRNA	Chr 10	30749326	30758021	+	2	341	65
TCONS_00060376	108636968	LOC108636968	protein_coding	Novel_lncRNA	Chr 10	30760919	30820433	+	2	1541	102
TCONS_00060388	102171983	PCNX4	protein_coding	Novel_lncRNA	Chr 10	30892034	30904563	+	2	771	205
TCONS_00060389	102171983	PCNX4	protein_coding	Novel_lncRNA	Chr 10	30897406	30904563	+	3	531	130
TCONS_00060450	XLOC_038508	XLOC_038508	novel	Novel_lncRNA	Chr 10	33435244	33435966	+	2	218	59
TCONS_00060451	XLOC_038508	XLOC_038508	novel	Novel_lncRNA	Chr 10	33435244	33444862	+	2	688	147
TCONS_00060475	102187323	KTN1	protein_coding	Novel_lncRNA	Chr 10	35195945	35218817	+	2	1220	240
TCONS_00060503	102185842	SOCS4	protein_coding	Novel_lncRNA	Chr 10	35687553	35695080	+	2	7222	204
TCONS_00060543	102182877	CDKN3	protein_coding	Novel_lncRNA	Chr 10	36256567	36267170	+	2	9781	197
TCONS_00060604	102178734	SPATA5L1	protein_coding	Novel_lncRNA	Chr 10	38132617	38133528	+	2	521	70
TCONS_00060914	102181127	LIPC	protein_coding	Novel_lncRNA	Chr 10	51281643	51301214	+	2	513	95
TCONS_00060990	100861305	RORA	protein_coding	Novel_lncRNA	Chr 10	54069564	54236717	+	2	388	106
TCONS_00061145	102191804	PLEKHO2	protein_coding	Novel_lncRNA	Chr 10	57792074	57797797	+	2	300	100
TCONS_00061161	XLOC_038980	XLOC_038980	novel	Novel_lncRNA	Chr 10	57857789	57866565	+	2	458	99
TCONS_00061176	XLOC_038994	XLOC_038994	novel	Novel_lncRNA	Chr 10	58051915	58093654	+	2	3534	99
TCONS_00061202	102189040	LOC102189040	protein_coding	Novel_lncRNA	Chr 10	58258660	58387411	+	3	491	109
TCONS_00061260	XLOC_039045	XLOC_039045	novel	Novel_lncRNA	Chr 10	60206529	60218357	+	2	333	105
TCONS_00061261	XLOC_039045	XLOC_039045	novel	Novel_lncRNA	Chr 10	60206532	60218357	+	2	573	185
TCONS_00061262	XLOC_039045	XLOC_039045	novel	Novel_lncRNA	Chr 10	60206532	60218357	+	2	490	124
TCONS_00061320	XLOC_039088	XLOC_039088	novel	Novel_lncRNA	Chr 10	65148472	65160981	+	3	2214	105
TCONS_00061321	XLOC_039088	XLOC_039088	novel	Novel_lncRNA	Chr 10	65148490	65160981	+	3	2192	105
TCONS_00061524	XLOC_039214	XLOC_039214	novel	Novel_lncRNA	Chr 10	69046681	69050152	+	2	593	119
TCONS_00061682	XLOC_039341	XLOC_039341	novel	Novel_lncRNA	Chr 10	75309732	75310811	+	2	1045	108
TCONS_00061785	102170977	TPPP2	protein_coding	Novel_lncRNA	Chr 10	76836504	76845088	+	17	1940	385
TCONS_00061786	102170977	TPPP2	protein_coding	Novel_lncRNA	Chr 10	76836504	76846294	+	17	3195	371
TCONS_00061791	102170977	TPPP2	protein_coding	Novel_lncRNA	Chr 10	76836514	76845088	+	16	1888	371
TCONS_00061796	102170522	RNASE13	protein_coding	Novel_lncRNA	Chr 10	76853833	76854924	+	2	864	207
TCONS_00061801	102169965	ARHGEF40	protein_coding	Novel_lncRNA	Chr 10	76875852	76898799	+	3	1124	120
TCONS_00061834	XLOC_039431	XLOC_039431	novel	Novel_lncRNA	Chr 10	77039181	77040298	+	2	235	65
TCONS_00061892	XLOC_039485	XLOC_039485	novel	Novel_lncRNA	Chr 10	78418123	78419004	+	2	683	116
TCONS_00061927	102180855	ABHD4	protein_coding	Novel_lncRNA	Chr 10	79253681	79264610	+	3	377	49
TCONS_00061928	102180855	ABHD4	protein_coding	Novel_lncRNA	Chr 10	79253681	79267657	+	4	446	49
TCONS_00061939	102179771	OXA1L	protein_coding	Novel_lncRNA	Chr 10	79385437	79388043	+	3	873	179
TCONS_00061962	102175298	C10H14orf93	protein_coding	Novel_lncRNA	Chr 10	79567395	79568222	+	2	234	47
TCONS_00062193	XLOC_039636	XLOC_039636	novel	Novel_lncRNA	Chr 10	82232677	82238036	+	2	4049	148
TCONS_00062220	102175213	UACA	protein_coding	Novel_lncRNA	Chr 10	83609252	83622194	+	2	792	140
TCONS_00062239	XLOC_039662	XLOC_039662	novel	Novel_lncRNA	Chr 10	83880688	83885977	+	2	206	62
TCONS_00062290	102172160	NOX5	protein_coding	Novel_lncRNA	Chr 10	85403983	85434800	+	2	217	71
TCONS_00062324	108636836	LOC108636836	protein_coding	Novel_lncRNA	Chr 10	86632738	86895005	+	22	2326	465
TCONS_00062385	102188223	RAB11A	protein_coding	Novel_lncRNA	Chr 10	88506994	88526898	+	2	1408	141
TCONS_00062417	XLOC_039759	XLOC_039759	novel	Novel_lncRNA	Chr 10	88893775	88896863	+	2	335	80
TCONS_00062463	102181782	SPG21	protein_coding	Novel_lncRNA	Chr 10	89345119	89356875	+	4	578	96
TCONS_00062519	102189959	JMY	protein_coding	Novel_lncRNA	Chr 10	90878740	90901494	+	2	17007	227
TCONS_00062529	102189127	LHFPL2	protein_coding	Novel_lncRNA	Chr 10	91494001	91509171	+	2	665	161
TCONS_00062638	XLOC_039895	XLOC_039895	novel	Novel_lncRNA	Chr 10	96371807	96372276	+	2	377	57
TCONS_00062684	XLOC_039936	XLOC_039936	novel	Novel_lncRNA	Chr 10	96959381	96960340	+	2	456	123
TCONS_00062743	102187406	EPB41L4A	protein_coding	Novel_lncRNA	Chr 10	99762544	99953482	+	6	1083	197
TCONS_00062751	XLOC_039980	XLOC_039980	novel	Novel_lncRNA	Chr 10	99781295	99885949	+	4	1025	103
TCONS_00062752	XLOC_039980	XLOC_039980	novel	Novel_lncRNA	Chr 10	99781308	99880915	+	3	780	127
TCONS_00062753	XLOC_039980	XLOC_039980	novel	Novel_lncRNA	Chr 10	99781308	99953482	+	4	559	103
TCONS_00062783	102183148	MCC	protein_coding	Novel_lncRNA	Chr 10	100421342	100672650	+	2	242	80
TCONS_00062808	102185925	CTDSPL2	protein_coding	Novel_lncRNA	Chr 10	360644	408652	-	5	1719	188
TCONS_00062839	102190793	TTC7B	protein_coding	Novel_lncRNA	Chr 10	823610	825132	-	2	570	145
TCONS_00062898	102189963	FOXN3	protein_coding	Novel_lncRNA	Chr 10	1952745	1966081	-	2	1529	159
TCONS_00062899	102189963	FOXN3	protein_coding	Novel_lncRNA	Chr 10	1952745	1989540	-	2	238	79
TCONS_00062900	102189963	FOXN3	protein_coding	Novel_lncRNA	Chr 10	1952745	2052848	-	2	370	79
TCONS_00062952	102182316	GPR65	protein_coding	Novel_lncRNA	Chr 10	3409444	3448075	-	3	502	85
TCONS_00062958	XLOC_040122	XLOC_040122	novel	Novel_lncRNA	Chr 10	4298102	4341049	-	3	286	64
TCONS_00063001	XLOC_040159	XLOC_040159	novel	Novel_lncRNA	Chr 10	11339388	11351094	-	3	1116	120
TCONS_00063029	102173011	SLIRP	protein_coding	Novel_lncRNA	Chr 10	14239465	14268355	-	8	2280	447
TCONS_00063075	XLOC_040198	XLOC_040198	novel	Novel_lncRNA	Chr 10	14870619	14872882	-	2	287	75
TCONS_00063081	XLOC_040203	XLOC_040203	novel	Novel_lncRNA	Chr 10	15114627	15124575	-	2	220	34
TCONS_00063189	102190699	ISCA2	protein_coding	Novel_lncRNA	Chr 10	17331895	17337600	-	3	4489	100
TCONS_00063210	102183073	BBOF1	protein_coding	Novel_lncRNA	Chr 10	17726740	17753959	-	12	3899	243
TCONS_00063269	102180598	DPF3	protein_coding	Novel_lncRNA	Chr 10	18983815	18991808	-	3	3032	158
TCONS_00063338	102177443	SLC8A3	protein_coding	Novel_lncRNA	Chr 10	21196949	21217952	-	2	449	93
TCONS_00063440	102176694	ZFP36L1	protein_coding	Novel_lncRNA	Chr 10	22518088	22523549	-	2	5439	209
TCONS_00063447	XLOC_040407	XLOC_040407	novel	Novel_lncRNA	Chr 10	22669174	22674259	-	2	746	157
TCONS_00063448	XLOC_040407	XLOC_040407	novel	Novel_lncRNA	Chr 10	22669174	22674540	-	2	694	157
TCONS_00063461	102174307	RAD51B	protein_coding	Novel_lncRNA	Chr 10	22853888	23072981	-	5	2176	135
TCONS_00063462	102174307	RAD51B	protein_coding	Novel_lncRNA	Chr 10	22853888	23152809	-	5	2419	126
TCONS_00063471	102174032	LOC102174032	protein_coding	Novel_lncRNA	Chr 10	23353255	23382191	-	3	1665	118
TCONS_00063477	102171613	ARG2	protein_coding	Novel_lncRNA	Chr 10	23604805	23626360	-	7	1494	254
TCONS_00063478	102171613	ARG2	protein_coding	Novel_lncRNA	Chr 10	23604805	23656772	-	6	1110	226
TCONS_00063493	102168546	MPP5	protein_coding	Novel_lncRNA	Chr 10	23904816	23931501	-	10	1404	272
TCONS_00063521	102189488	LOC102189488	protein_coding	Novel_lncRNA	Chr 10	25931491	25943765	-	2	237	44
TCONS_00063555	102187229	PPP1R36	protein_coding	Novel_lncRNA	Chr 10	26426808	26430457	-	3	967	67
TCONS_00063558	102186967	ZBTB1	protein_coding	Novel_lncRNA	Chr 10	26438575	26445981	-	4	540	38
TCONS_00063593	102183521	WDR89	protein_coding	Novel_lncRNA	Chr 10	27228113	27276352	-	2	1368	414
TCONS_00063644	102179858	TMEM30B	protein_coding	Novel_lncRNA	Chr 10	29783363	29834104	-	4	1266	108
TCONS_00063674	102173941	SIX4	protein_coding	Novel_lncRNA	Chr 10	30313325	30317560	-	2	2613	146
TCONS_00063675	XLOC_040558	XLOC_040558	novel	Novel_lncRNA	Chr 10	30360828	30362642	-	2	1678	111
TCONS_00063676	XLOC_040558	XLOC_040558	novel	Novel_lncRNA	Chr 10	30360828	30362679	-	2	1214	137
TCONS_00063677	XLOC_040558	XLOC_040558	novel	Novel_lncRNA	Chr 10	30360828	30362863	-	2	1945	143
TCONS_00063679	XLOC_040558	XLOC_040558	novel	Novel_lncRNA	Chr 10	30360828	30363499	-	2	1174	124
TCONS_00063680	XLOC_040558	XLOC_040558	novel	Novel_lncRNA	Chr 10	30360828	30363869	-	2	1256	151
TCONS_00063702	102171983	PCNX4	protein_coding	Novel_lncRNA	Chr 10	30895929	30904559	-	3	1988	130
TCONS_00063721	102170322	DAAM1	protein_coding	Novel_lncRNA	Chr 10	31710791	31758515	-	2	659	87
TCONS_00063859	102184155	CGRRF1	protein_coding	Novel_lncRNA	Chr 10	36158676	36183099	-	5	720	202
TCONS_00063939	102182313	SEMA6D	protein_coding	Novel_lncRNA	Chr 10	40449008	40453931	-	2	4465	169
TCONS_00063980	102179481	EID1	protein_coding	Novel_lncRNA	Chr 10	41804613	41806594	-	2	1813	239
TCONS_00064058	102172162	GLDN	protein_coding	Novel_lncRNA	Chr 10	44154596	44161716	-	2	733	193
TCONS_00064270	108636854	LOC108636854	protein_coding	Novel_lncRNA	Chr 10	49774074	49777700	-	4	3085	302
TCONS_00064271	108636854	LOC108636854	protein_coding	Novel_lncRNA	Chr 10	49774074	49931067	-	6	2892	279
TCONS_00064272	108636854	LOC108636854	protein_coding	Novel_lncRNA	Chr 10	49774074	49931067	-	6	3089	279
TCONS_00064273	108636854	LOC108636854	protein_coding	Novel_lncRNA	Chr 10	49774074	50180373	-	23	7287	686
TCONS_00064274	108636854	LOC108636854	protein_coding	Novel_lncRNA	Chr 10	49774074	50180373	-	23	7144	686
TCONS_00064286	102182133	MYZAP	protein_coding	Novel_lncRNA	Chr 10	50565817	50587054	-	2	1618	107
TCONS_00064376	100861305	RORA	protein_coding	Novel_lncRNA	Chr 10	53624368	54236706	-	2	4491	134
TCONS_00064420	XLOC_041020	XLOC_041020	novel	Novel_lncRNA	Chr 10	56238059	56264697	-	2	293	68
TCONS_00064512	XLOC_041073	XLOC_041073	novel	Novel_lncRNA	Chr 10	57846780	57848956	-	2	509	118
TCONS_00064521	XLOC_041082	XLOC_041082	novel	Novel_lncRNA	Chr 10	58051967	58090383	-	2	211	68
TCONS_00064841	102175025	EIF2AK4	protein_coding	Novel_lncRNA	Chr 10	67372021	67376584	-	6	1751	118
TCONS_00064842	102175025	EIF2AK4	protein_coding	Novel_lncRNA	Chr 10	67372021	67376584	-	5	2233	118
TCONS_00064859	XLOC_041277	XLOC_041277	novel	Novel_lncRNA	Chr 10	68548811	68551852	-	2	966	82
TCONS_00064873	XLOC_041290	XLOC_041290	novel	Novel_lncRNA	Chr 10	69026782	69050355	-	2	13241	138
TCONS_00064893	XLOC_041306	XLOC_041306	novel	Novel_lncRNA	Chr 10	69239257	69349869	-	2	286	54
TCONS_00064966	102191528	KATNBL1	protein_coding	Novel_lncRNA	Chr 10	74594777	74635861	-	4	1257	122
TCONS_00065027	XLOC_041425	XLOC_041425	novel	Novel_lncRNA	Chr 10	76078036	76082777	-	2	218	72
TCONS_00065153	102191141	CHD8	protein_coding	Novel_lncRNA	Chr 10	77201971	77203142	-	2	218	72
TCONS_00065458	102175769	REC114	protein_coding	Novel_lncRNA	Chr 10	80995323	81062776	-	9	1341	348
TCONS_00065537	102176609	THSD4	protein_coding	Novel_lncRNA	Chr 10	83236330	83285979	-	4	1193	202
TCONS_00065538	102176609	THSD4	protein_coding	Novel_lncRNA	Chr 10	83272566	83285979	-	2	847	183
TCONS_00065583	XLOC_041722	XLOC_041722	novel	Novel_lncRNA	Chr 10	84879712	84899152	-	2	13949	190
TCONS_00065755	102183602	CILP	protein_coding	Novel_lncRNA	Chr 10	89050561	89102450	-	3	3614	142
TCONS_00065780	102182310	SLC51B	protein_coding	Novel_lncRNA	Chr 10	89261267	89287572	-	5	927	283
TCONS_00065848	102176885	PAPD4	protein_coding	Novel_lncRNA	Chr 10	90652580	90668620	-	7	2168	129
TCONS_00065856	XLOC_041907	XLOC_041907	novel	Novel_lncRNA	Chr 10	90877563	90878464	-	2	744	105
TCONS_00065866	102174396	SCAMP1	protein_coding	Novel_lncRNA	Chr 10	91494139	91668624	-	5	7807	288
TCONS_00066056	XLOC_042060	XLOC_042060	novel	Novel_lncRNA	Chr 10	98969797	98993159	-	3	555	81
TCONS_00066070	XLOC_042074	XLOC_042074	novel	Novel_lncRNA	Chr 10	99024708	99026705	-	2	386	73
TCONS_00066102	XLOC_042088	XLOC_042088	novel	Novel_lncRNA	Chr 10	99781308	99880513	-	3	378	81
TCONS_00066103	XLOC_042088	XLOC_042088	novel	Novel_lncRNA	Chr 10	99817645	99880453	-	3	203	53
TCONS_00066259	XLOC_042201	XLOC_042201	novel	Novel_lncRNA	Chr 11	2162249	2162835	+	2	221	73
TCONS_00066283	102174482	ARID5A	protein_coding	Novel_lncRNA	Chr 11	2481646	2500385	+	6	4400	205
TCONS_00066284	102174482	ARID5A	protein_coding	Novel_lncRNA	Chr 11	2481646	2500385	+	3	4009	205
TCONS_00066304	XLOC_042223	XLOC_042223	novel	Novel_lncRNA	Chr 11	2829119	2829780	+	2	470	85
TCONS_00066375	102178364	AFF3	protein_coding	Novel_lncRNA	Chr 11	5148246	5196676	+	2	377	125
TCONS_00066393	102187586	NPAS2	protein_coding	Novel_lncRNA	Chr 11	5695047	5716197	+	2	465	105
TCONS_00066476	102188323	IL1RL1	protein_coding	Novel_lncRNA	Chr 11	7000072	7004121	+	2	2292	121
TCONS_00066670	102187495	DYSF	protein_coding	Novel_lncRNA	Chr 11	12924969	12926516	+	2	396	90
TCONS_00066811	102172905	CEBPZOS	protein_coding	Novel_lncRNA	Chr 11	19485868	19492414	+	6	857	77
TCONS_00066812	102172905	CEBPZOS	protein_coding	Novel_lncRNA	Chr 11	19485868	19492414	+	5	1121	77
TCONS_00066813	102172905	CEBPZOS	protein_coding	Novel_lncRNA	Chr 11	19485868	19492414	+	5	646	77
TCONS_00066814	102172905	CEBPZOS	protein_coding	Novel_lncRNA	Chr 11	19485868	19492414	+	3	439	51
TCONS_00066821	102172905	CEBPZOS	protein_coding	Novel_lncRNA	Chr 11	19487521	19492414	+	4	545	79
TCONS_00066920	XLOC_042557	XLOC_042557	novel	Novel_lncRNA	Chr 11	23921354	23922679	+	2	204	51
TCONS_00066925	106502603	C11H2orf91	protein_coding	Novel_lncRNA	Chr 11	24161475	24265065	+	2	326	108
TCONS_00066974	XLOC_042594	XLOC_042594	novel	Novel_lncRNA	Chr 11	25251353	25321114	+	2	247	82
TCONS_00066984	XLOC_042604	XLOC_042604	novel	Novel_lncRNA	Chr 11	25312029	25314436	+	2	988	172
TCONS_00067022	XLOC_042630	XLOC_042630	novel	Novel_lncRNA	Chr 11	26158925	26164682	+	2	2806	185
TCONS_00067023	XLOC_042630	XLOC_042630	novel	Novel_lncRNA	Chr 11	26158966	26203004	+	2	4420	177
TCONS_00067047	102190327	SLC3A1	protein_coding	Novel_lncRNA	Chr 11	26371381	26410108	+	15	5768	733
TCONS_00067077	XLOC_042678	XLOC_042678	novel	Novel_lncRNA	Chr 11	27192306	27201842	+	2	227	75
TCONS_00067105	XLOC_042703	XLOC_042703	novel	Novel_lncRNA	Chr 11	28490845	28512646	+	2	203	53
TCONS_00067179	102174035	FOXN2	protein_coding	Novel_lncRNA	Chr 11	30216014	30292751	+	2	844	85
TCONS_00067202	XLOC_042780	XLOC_042780	novel	Novel_lncRNA	Chr 11	30670374	30670922	+	2	323	67
TCONS_00067232	XLOC_042808	XLOC_042808	novel	Novel_lncRNA	Chr 11	36272690	36313423	+	2	410	71
TCONS_00067236	XLOC_042808	XLOC_042808	novel	Novel_lncRNA	Chr 11	36309621	36313423	+	2	300	78
TCONS_00067242	XLOC_042816	XLOC_042816	novel	Novel_lncRNA	Chr 11	36627645	36631814	+	2	4145	121
TCONS_00067249	102185370	C11H2orf73	protein_coding	Novel_lncRNA	Chr 11	36651308	36662181	+	3	2716	192
TCONS_00067250	102185370	C11H2orf73	protein_coding	Novel_lncRNA	Chr 11	36652032	36655371	+	2	2022	119
TCONS_00067253	102185370	C11H2orf73	protein_coding	Novel_lncRNA	Chr 11	36667187	36699209	+	2	644	76
TCONS_00067541	102177445	CHCHD5	protein_coding	Novel_lncRNA	Chr 11	45919176	45927539	+	4	2831	188
TCONS_00067567	XLOC_043039	XLOC_043039	novel	Novel_lncRNA	Chr 11	46060933	46062562	+	2	441	123
TCONS_00067640	XLOC_043079	XLOC_043079	novel	Novel_lncRNA	Chr 11	47689085	47721814	+	2	464	69
TCONS_00067675	102189135	IMMT	protein_coding	Novel_lncRNA	Chr 11	48313737	48350262	+	25	3181	690
TCONS_00067680	XLOC_043098	XLOC_043098	novel	Novel_lncRNA	Chr 11	48541745	48544645	+	2	247	54
TCONS_00067845	102175134	FAM161A	protein_coding	Novel_lncRNA	Chr 11	60122949	60134694	+	2	313	90
TCONS_00068002	XLOC_043335	XLOC_043335	novel	Novel_lncRNA	Chr 11	66380127	66390422	+	2	471	94
TCONS_00068003	XLOC_043335	XLOC_043335	novel	Novel_lncRNA	Chr 11	66380130	66390422	+	3	596	93
TCONS_00068066	102175864	MXD1	protein_coding	Novel_lncRNA	Chr 11	67990456	68015653	+	2	25016	206
TCONS_00068067	102175864	MXD1	protein_coding	Novel_lncRNA	Chr 11	67990456	68015653	+	3	23286	206
TCONS_00068142	XLOC_043431	XLOC_043431	novel	Novel_lncRNA	Chr 11	70750031	70750773	+	2	464	75
TCONS_00068158	XLOC_043446	XLOC_043446	novel	Novel_lncRNA	Chr 11	71135169	71137032	+	2	313	93
TCONS_00068168	XLOC_043450	XLOC_043450	novel	Novel_lncRNA	Chr 11	71684813	71689159	+	2	964	67
TCONS_00068187	102178367	SLC4A1AP	protein_coding	Novel_lncRNA	Chr 11	71721780	71739026	+	2	552	151
TCONS_00068196	102176700	IFT172	protein_coding	Novel_lncRNA	Chr 11	71919661	71921803	+	2	411	79
TCONS_00068421	XLOC_043615	XLOC_043615	novel	Novel_lncRNA	Chr 11	75663073	75718808	+	3	354	82
TCONS_00068450	102184449	HS1BP3	protein_coding	Novel_lncRNA	Chr 11	77939156	77954107	+	2	2622	206
TCONS_00068525	XLOC_043689	XLOC_043689	novel	Novel_lncRNA	Chr 11	80536654	80553505	+	2	304	60
TCONS_00068680	XLOC_043807	XLOC_043807	novel	Novel_lncRNA	Chr 11	87900728	87901960	+	2	459	57
TCONS_00068961	XLOC_043984	XLOC_043984	novel	Novel_lncRNA	Chr 11	98002646	98003753	+	2	480	108
TCONS_00069054	102175412	ODF2	protein_coding	Novel_lncRNA	Chr 11	98566217	98567516	+	2	354	117
TCONS_00069129	102168642	SH3GLB2	protein_coding	Novel_lncRNA	Chr 11	98958846	98964293	+	2	219	63
TCONS_00069169	XLOC_044076	XLOC_044076	novel	Novel_lncRNA	Chr 11	99373281	99377672	+	2	669	113
TCONS_00069176	XLOC_044080	XLOC_044080	novel	Novel_lncRNA	Chr 11	99386805	99390840	+	2	766	140
TCONS_00069195	102181607	ASB6	protein_coding	Novel_lncRNA	Chr 11	99504717	99508790	+	2	3974	253
TCONS_00069275	108637171	LOC108637171	protein_coding	Novel_lncRNA	Chr 11	100919766	100935683	+	2	5424	556
TCONS_00069278	108637171	LOC108637171	protein_coding	Novel_lncRNA	Chr 11	100936165	100940346	+	4	455	145
TCONS_00069279	XLOC_044137	XLOC_044137	novel	Novel_lncRNA	Chr 11	100941689	100944647	+	2	1339	201
TCONS_00069280	XLOC_044137	XLOC_044137	novel	Novel_lncRNA	Chr 11	100941723	100944647	+	2	1130	201
TCONS_00069283	XLOC_044140	XLOC_044140	novel	Novel_lncRNA	Chr 11	100966448	100969507	+	2	874	175
TCONS_00069583	108637100	LOC108637100	protein_coding	Novel_lncRNA	Chr 11	104680103	104683959	+	3	2134	262
TCONS_00069584	108637100	LOC108637100	protein_coding	Novel_lncRNA	Chr 11	104680119	104683959	+	3	2502	262
TCONS_00069591	XLOC_044313	XLOC_044313	novel	Novel_lncRNA	Chr 11	104893042	104894440	+	2	1361	232
TCONS_00069675	108637183	EXD3	protein_coding	Novel_lncRNA	Chr 11	105913487	105916287	+	3	337	112
TCONS_00069893	102176968	TMEM131	protein_coding	Novel_lncRNA	Chr 11	3129404	3135797	-	2	2537	209
TCONS_00070000	XLOC_044539	XLOC_044539	novel	Novel_lncRNA	Chr 11	5900416	5903355	-	2	297	98
TCONS_00070029	XLOC_044550	XLOC_044550	novel	Novel_lncRNA	Chr 11	6335720	6339511	-	2	1187	132
TCONS_00070046	102186601	IL1R2	protein_coding	Novel_lncRNA	Chr 11	6628027	6636953	-	2	238	79
TCONS_00070055	102189132	SLC9A4	protein_coding	Novel_lncRNA	Chr 11	7113789	7128004	-	2	226	54
TCONS_00070083	102186210	LOC102186210	protein_coding	Novel_lncRNA	Chr 11	8986017	9025023	-	11	3079	412
TCONS_00070160	102177346	DGUOK	protein_coding	Novel_lncRNA	Chr 11	10559382	10562339	-	3	876	92
TCONS_00070221	102183150	EXOC6B	protein_coding	Novel_lncRNA	Chr 11	12198248	12200311	-	2	1744	109
TCONS_00070305	102184251	PAIP2B	protein_coding	Novel_lncRNA	Chr 11	13260247	13266006	-	2	5240	135
TCONS_00070413	102172452	CEBPZ	protein_coding	Novel_lncRNA	Chr 11	19485888	19492731	-	6	988	92
TCONS_00070414	102172452	CEBPZ	protein_coding	Novel_lncRNA	Chr 11	19485888	19493391	-	3	1396	89
TCONS_00070430	XLOC_044804	XLOC_044804	novel	Novel_lncRNA	Chr 11	20082970	20084255	-	2	342	113
TCONS_00070648	102176890	LOC102176890	protein_coding	Novel_lncRNA	Chr 11	24812128	24955971	-	14	1474	490
TCONS_00070729	XLOC_045023	XLOC_045023	novel	Novel_lncRNA	Chr 11	27191887	27201834	-	2	638	104
TCONS_00070765	XLOC_045055	XLOC_045055	novel	Novel_lncRNA	Chr 11	28490787	28512836	-	2	451	63
TCONS_00070925	102174217	TSPYL6	protein_coding	Novel_lncRNA	Chr 11	36441272	36626088	-	4	1970	232
TCONS_00070932	XLOC_045173	XLOC_045173	novel	Novel_lncRNA	Chr 11	36767446	36771658	-	2	220	73
TCONS_00070991	102176429	CCDC85A	protein_coding	Novel_lncRNA	Chr 11	38446949	38456486	-	2	432	81
TCONS_00071009	XLOC_045208	XLOC_045208	novel	Novel_lncRNA	Chr 11	41524274	41531594	-	3	202	45
TCONS_00071040	102169598	PUS10	protein_coding	Novel_lncRNA	Chr 11	43351529	43357451	-	3	428	82
TCONS_00071134	XLOC_045295	XLOC_045295	novel	Novel_lncRNA	Chr 11	46061000	46062444	-	2	256	83
TCONS_00071180	102187598	KRCC1	protein_coding	Novel_lncRNA	Chr 11	47606365	47620160	-	2	1069	271
TCONS_00071289	102170984	ELMOD3	protein_coding	Novel_lncRNA	Chr 11	49153646	49163131	-	6	1419	127
TCONS_00071290	102170984	ELMOD3	protein_coding	Novel_lncRNA	Chr 11	49153646	49163134	-	5	2055	127
TCONS_00071314	XLOC_045418	XLOC_045418	novel	Novel_lncRNA	Chr 11	49596602	49600100	-	2	1305	89
TCONS_00071351	XLOC_045447	XLOC_045447	novel	Novel_lncRNA	Chr 11	59927372	59929814	-	2	405	74
TCONS_00071405	102176430	WDPCP	protein_coding	Novel_lncRNA	Chr 11	61642930	61730969	-	2	642	156
TCONS_00071406	102176430	WDPCP	protein_coding	Novel_lncRNA	Chr 11	61688233	61731019	-	2	594	148
TCONS_00071420	XLOC_045509	XLOC_045509	novel	Novel_lncRNA	Chr 11	61945927	62012573	-	2	242	50
TCONS_00071544	XLOC_045614	XLOC_045614	novel	Novel_lncRNA	Chr 11	65994142	66018588	-	3	246	56
TCONS_00071546	XLOC_045616	XLOC_045616	novel	Novel_lncRNA	Chr 11	66051806	66053644	-	2	648	77
TCONS_00071580	XLOC_045645	XLOC_045645	novel	Novel_lncRNA	Chr 11	66380122	66390356	-	2	410	96
TCONS_00071603	XLOC_045665	XLOC_045665	novel	Novel_lncRNA	Chr 11	67082760	67083308	-	2	296	70
TCONS_00071640	102187870	ANXA4	protein_coding	Novel_lncRNA	Chr 11	67897496	67907660	-	2	330	46
TCONS_00071651	XLOC_045686	XLOC_045686	novel	Novel_lncRNA	Chr 11	67982967	67986300	-	2	392	101
TCONS_00071886	102181134	CENPA	protein_coding	Novel_lncRNA	Chr 11	72513262	72516990	-	2	872	172
TCONS_00071922	108637092	LOC108637092	protein_coding	Novel_lncRNA	Chr 11	73679580	73784841	-	23	10213	942
TCONS_00071953	102169302	NCOA1	protein_coding	Novel_lncRNA	Chr 11	74248246	74328933	-	5	3900	107
TCONS_00071984	102171523	FAM228B	protein_coding	Novel_lncRNA	Chr 11	74678589	74693953	-	8	2798	344
TCONS_00071985	102171523	FAM228B	protein_coding	Novel_lncRNA	Chr 11	74678589	74693953	-	7	3722	234
TCONS_00072107	102177724	KCNS3	protein_coding	Novel_lncRNA	Chr 11	80459187	80471085	-	3	1887	241
TCONS_00072176	XLOC_046038	XLOC_046038	novel	Novel_lncRNA	Chr 11	85647686	85650732	-	2	2672	138
TCONS_00072277	XLOC_046079	XLOC_046079	novel	Novel_lncRNA	Chr 11	86395401	86408029	-	4	446	84
TCONS_00072365	XLOC_046126	XLOC_046126	novel	Novel_lncRNA	Chr 11	87900731	87901897	-	2	393	57
TCONS_00072378	XLOC_046136	XLOC_046136	novel	Novel_lncRNA	Chr 11	88188902	88190970	-	2	936	54
TCONS_00072426	102191624	LOC102191624	protein_coding	Novel_lncRNA	Chr 11	91902216	91907064	-	2	4136	160
TCONS_00072460	102169303	LHX6	protein_coding	Novel_lncRNA	Chr 11	92670773	92680513	-	2	2344	193
TCONS_00072625	102191147	STXBP1	protein_coding	Novel_lncRNA	Chr 11	97819378	97860248	-	3	454	108
TCONS_00072793	102168915	MIGA2	protein_coding	Novel_lncRNA	Chr 11	98999082	99001688	-	2	906	106
TCONS_00072880	100860879	ASS1	protein_coding	Novel_lncRNA	Chr 11	100241921	100242891	-	2	213	71
TCONS_00072896	102184349	ABL1	protein_coding	Novel_lncRNA	Chr 11	100557588	100565803	-	2	891	104
TCONS_00072911	XLOC_046453	XLOC_046453	novel	Novel_lncRNA	Chr 11	100941674	100943962	-	2	494	98
TCONS_00072912	XLOC_046453	XLOC_046453	novel	Novel_lncRNA	Chr 11	100941674	100944071	-	2	778	116
TCONS_00072919	XLOC_046459	XLOC_046459	novel	Novel_lncRNA	Chr 11	100965764	100969237	-	2	1288	175
TCONS_00073042	XLOC_046515	XLOC_046515	novel	Novel_lncRNA	Chr 11	103066572	103069500	-	2	1539	282
TCONS_00073062	102170987	CARD9	protein_coding	Novel_lncRNA	Chr 11	103242029	103243632	-	2	1518	157
TCONS_00073173	XLOC_046565	XLOC_046565	novel	Novel_lncRNA	Chr 11	103773590	103773981	-	2	235	76
TCONS_00073197	XLOC_046575	XLOC_046575	novel	Novel_lncRNA	Chr 11	104255152	104257542	-	2	1110	215
TCONS_00073247	102186220	TMEM141	protein_coding	Novel_lncRNA	Chr 11	104571167	104575236	-	2	2808	155
TCONS_00073271	XLOC_046627	XLOC_046627	novel	Novel_lncRNA	Chr 11	104892988	104894587	-	2	1562	246
TCONS_00073466	102173015	ARHGEF7	protein_coding	Novel_lncRNA	Chr 12	776834	777620	+	2	464	154
TCONS_00073468	XLOC_046748	XLOC_046748	novel	Novel_lncRNA	Chr 12	899084	909976	+	2	10840	184
TCONS_00073469	XLOC_046748	XLOC_046748	novel	Novel_lncRNA	Chr 12	900936	937954	+	5	1128	83
TCONS_00073557	102170796	MYO16	protein_coding	Novel_lncRNA	Chr 12	2388723	2514783	+	2	268	89
TCONS_00073620	102180054	METTL21C	protein_coding	Novel_lncRNA	Chr 12	7354438	7356619	+	3	648	153
TCONS_00073653	XLOC_046871	XLOC_046871	novel	Novel_lncRNA	Chr 12	9506686	9513160	+	2	1811	140
TCONS_00073669	102177727	LOC102177727	protein_coding	Novel_lncRNA	Chr 12	10054142	10225844	+	9	2213	367
TCONS_00073670	102177727	LOC102177727	protein_coding	Novel_lncRNA	Chr 12	10054864	10225844	+	8	1443	351
TCONS_00073758	108637289	LOC108637289	protein_coding	Novel_lncRNA	Chr 12	14293959	14433355	+	2	1377	93
TCONS_00073759	108637289	LOC108637289	protein_coding	Novel_lncRNA	Chr 12	14295191	14434926	+	2	1726	109
TCONS_00073761	108637255	LOC108637255	protein_coding	Novel_lncRNA	Chr 12	14461572	14524351	+	3	7489	185
TCONS_00073762	108637255	LOC108637255	protein_coding	Novel_lncRNA	Chr 12	14463485	14511556	+	3	10241	248
TCONS_00073880	102188232	NDFIP2	protein_coding	Novel_lncRNA	Chr 12	31408625	31412896	+	2	3546	67
TCONS_00073903	102187238	RBM26	protein_coding	Novel_lncRNA	Chr 12	31563351	31595080	+	2	11503	198
TCONS_00073931	102184070	CLN5	protein_coding	Novel_lncRNA	Chr 12	33919360	33931941	+	2	6910	172
TCONS_00073992	102181509	COMMD6	protein_coding	Novel_lncRNA	Chr 12	35807769	35809136	+	2	1280	120
TCONS_00074029	102189320	KLF12	protein_coding	Novel_lncRNA	Chr 12	37733531	37772815	+	2	1451	84
TCONS_00074061	XLOC_047157	XLOC_047157	novel	Novel_lncRNA	Chr 12	40958374	40974036	+	3	12835	165
TCONS_00074104	XLOC_047196	XLOC_047196	novel	Novel_lncRNA	Chr 12	49967853	49976009	+	2	7646	114
TCONS_00074161	106502702	IL17D	protein_coding	Novel_lncRNA	Chr 12	50936308	50939182	+	2	322	76
TCONS_00074190	XLOC_047247	XLOC_047247	novel	Novel_lncRNA	Chr 12	51552611	51556626	+	2	307	102
TCONS_00074199	102169022	TNFRSF19	protein_coding	Novel_lncRNA	Chr 12	52252542	52295419	+	5	1527	131
TCONS_00074201	102169022	TNFRSF19	protein_coding	Novel_lncRNA	Chr 12	52252893	52285522	+	4	2179	178
TCONS_00074336	XLOC_047334	XLOC_047334	novel	Novel_lncRNA	Chr 12	55790608	55828182	+	3	513	126
TCONS_00074341	XLOC_047339	XLOC_047339	novel	Novel_lncRNA	Chr 12	55926114	55930290	+	2	940	95
TCONS_00074355	XLOC_047352	XLOC_047352	novel	Novel_lncRNA	Chr 12	56365108	56366136	+	2	824	84
TCONS_00074409	XLOC_047391	XLOC_047391	novel	Novel_lncRNA	Chr 12	56668228	56678589	+	2	479	104
TCONS_00074414	XLOC_047396	XLOC_047396	novel	Novel_lncRNA	Chr 12	56690166	56693565	+	2	238	64
TCONS_00074476	102181312	N4BP2L2	protein_coding	Novel_lncRNA	Chr 12	58106425	58113807	+	2	866	85
TCONS_00074479	102181312	N4BP2L2	protein_coding	Novel_lncRNA	Chr 12	58111302	58113807	+	2	1777	85
TCONS_00074502	XLOC_047453	XLOC_047453	novel	Novel_lncRNA	Chr 12	59087895	59094820	+	2	680	113
TCONS_00074553	102175772	SERTM1	protein_coding	Novel_lncRNA	Chr 12	61773281	61798552	+	5	3732	189
TCONS_00074555	102175772	SERTM1	protein_coding	Novel_lncRNA	Chr 12	61773512	61798552	+	4	3212	151
TCONS_00074624	XLOC_047545	XLOC_047545	novel	Novel_lncRNA	Chr 12	64397126	64399291	+	2	599	142
TCONS_00074631	102184915	FOXO1	protein_coding	Novel_lncRNA	Chr 12	64768762	64777921	+	2	4104	639
TCONS_00074655	102183524	ATP7B	protein_coding	Novel_lncRNA	Chr 12	65192400	65195799	+	3	734	141
TCONS_00074740	XLOC_047632	XLOC_047632	novel	Novel_lncRNA	Chr 12	67154325	67160750	+	2	3503	116
TCONS_00074768	102181313	RCBTB1	protein_coding	Novel_lncRNA	Chr 12	67488517	67492684	+	2	2570	151
TCONS_00074782	XLOC_047660	XLOC_047660	novel	Novel_lncRNA	Chr 12	67722397	67724485	+	2	203	56
TCONS_00074789	102184817	CYSLTR2	protein_coding	Novel_lncRNA	Chr 12	68134129	68150621	+	3	289	86
TCONS_00074803	102183611	LPAR6	protein_coding	Novel_lncRNA	Chr 12	68333303	68451031	+	27	5515	996
TCONS_00074808	XLOC_047671	XLOC_047671	novel	Novel_lncRNA	Chr 12	68578768	68623126	+	2	223	58
TCONS_00074826	XLOC_047686	XLOC_047686	novel	Novel_lncRNA	Chr 12	70139674	70142533	+	3	901	98
TCONS_00074884	102179106	KCTD4	protein_coding	Novel_lncRNA	Chr 12	71138581	71273228	+	8	1841	302
TCONS_00074885	102179106	KCTD4	protein_coding	Novel_lncRNA	Chr 12	71138581	71273228	+	7	1759	157
TCONS_00074887	102179392	GTF2F2	protein_coding	Novel_lncRNA	Chr 12	71265535	71273228	+	2	305	101
TCONS_00075000	102170795	ELF1	protein_coding	Novel_lncRNA	Chr 12	75238600	75262313	+	10	3520	422
TCONS_00075104	XLOC_047881	XLOC_047881	novel	Novel_lncRNA	Chr 12	1019955	1022525	-	2	1961	104
TCONS_00075107	XLOC_047881	XLOC_047881	novel	Novel_lncRNA	Chr 12	1028846	1033570	-	2	4555	258
TCONS_00075119	102183802	RAB20	protein_coding	Novel_lncRNA	Chr 12	1102976	1105151	-	2	1528	211
TCONS_00075138	XLOC_047903	XLOC_047903	novel	Novel_lncRNA	Chr 12	1619235	1625908	-	2	238	79
TCONS_00075147	XLOC_047911	XLOC_047911	novel	Novel_lncRNA	Chr 12	1719413	1720852	-	2	621	107
TCONS_00075174	102183248	ABHD13	protein_coding	Novel_lncRNA	Chr 12	2680806	2687823	-	2	4461	189
TCONS_00075192	XLOC_047950	XLOC_047950	novel	Novel_lncRNA	Chr 12	4333647	4339913	-	2	231	77
TCONS_00075216	102181510	LOC102181510	protein_coding	Novel_lncRNA	Chr 12	7182081	7186820	-	3	1220	118
TCONS_00075217	102181510	LOC102181510	protein_coding	Novel_lncRNA	Chr 12	7182081	7187253	-	3	1401	118
TCONS_00075225	102180864	BIVM	protein_coding	Novel_lncRNA	Chr 12	7254163	7258127	-	2	501	136
TCONS_00075258	102179491	ITGBL1	protein_coding	Novel_lncRNA	Chr 12	8296003	8297303	-	2	1101	104
TCONS_00075292	XLOC_048019	XLOC_048019	novel	Novel_lncRNA	Chr 12	10295765	10300518	-	2	1960	266
TCONS_00075308	XLOC_048029	XLOC_048029	novel	Novel_lncRNA	Chr 12	11280515	11293013	-	2	209	60
TCONS_00075362	108637255	LOC108637255	protein_coding	Novel_lncRNA	Chr 12	14461572	14513067	-	2	617	112
TCONS_00075363	108637255	LOC108637255	protein_coding	Novel_lncRNA	Chr 12	14461572	14518072	-	3	1210	125
TCONS_00075364	108637255	LOC108637255	protein_coding	Novel_lncRNA	Chr 12	14463508	14501490	-	2	379	48
TCONS_00075496	XLOC_048169	XLOC_048169	novel	Novel_lncRNA	Chr 12	30546743	30561580	-	2	207	38
TCONS_00075509	XLOC_048182	XLOC_048182	novel	Novel_lncRNA	Chr 12	30621858	30650066	-	3	4019	108
TCONS_00075510	XLOC_048183	XLOC_048183	novel	Novel_lncRNA	Chr 12	30627039	30627496	-	2	326	64
TCONS_00075517	XLOC_048190	XLOC_048190	novel	Novel_lncRNA	Chr 12	30720970	30724914	-	2	3485	299
TCONS_00075886	XLOC_048402	XLOC_048402	novel	Novel_lncRNA	Chr 12	55208665	55209715	-	2	222	45
TCONS_00075907	XLOC_048418	XLOC_048418	novel	Novel_lncRNA	Chr 12	55790613	55820086	-	2	290	83
TCONS_00075910	XLOC_048421	XLOC_048421	novel	Novel_lncRNA	Chr 12	55820150	55826854	-	3	1364	125
TCONS_00075911	XLOC_048421	XLOC_048421	novel	Novel_lncRNA	Chr 12	55821887	55828258	-	2	350	99
TCONS_00076054	XLOC_048508	XLOC_048508	novel	Novel_lncRNA	Chr 12	59143173	59147826	-	2	344	94
TCONS_00076066	102178370	MAB21L1	protein_coding	Novel_lncRNA	Chr 12	60270141	60828948	-	44	7448	2375
TCONS_00076067	102186605	NBEA	protein_coding	Novel_lncRNA	Chr 12	60441517	60554846	-	2	202	65
TCONS_00076068	102178370	MAB21L1	protein_coding	Novel_lncRNA	Chr 12	60718042	60755289	-	2	334	84
TCONS_00076192	XLOC_048599	XLOC_048599	novel	Novel_lncRNA	Chr 12	64389658	64405017	-	3	6934	235
TCONS_00076196	XLOC_048599	XLOC_048599	novel	Novel_lncRNA	Chr 12	64392283	64405017	-	3	7568	135
TCONS_00076197	XLOC_048599	XLOC_048599	novel	Novel_lncRNA	Chr 12	64392283	64405017	-	3	6127	165
TCONS_00076206	XLOC_048610	XLOC_048610	novel	Novel_lncRNA	Chr 12	64540407	64563289	-	2	697	78
TCONS_00076305	102190140	SERPINE3	protein_coding	Novel_lncRNA	Chr 12	65785264	65799435	-	4	1092	88
TCONS_00076338	XLOC_048703	XLOC_048703	novel	Novel_lncRNA	Chr 12	66748761	66810232	-	2	236	61
TCONS_00076348	XLOC_048713	XLOC_048713	novel	Novel_lncRNA	Chr 12	66913002	66922895	-	3	725	106
TCONS_00076369	XLOC_048734	XLOC_048734	novel	Novel_lncRNA	Chr 12	67005081	67020534	-	3	1016	135
TCONS_00076370	XLOC_048734	XLOC_048734	novel	Novel_lncRNA	Chr 12	67005081	67020534	-	2	910	135
TCONS_00076380	108637304	LOC108637304	protein_coding	Novel_lncRNA	Chr 12	67022874	67085012	-	3	2271	204
TCONS_00076381	108637304	LOC108637304	protein_coding	Novel_lncRNA	Chr 12	67022874	67118509	-	6	2394	204
TCONS_00076451	XLOC_048794	XLOC_048794	novel	Novel_lncRNA	Chr 12	67668780	67688902	-	2	323	105
TCONS_00076521	XLOC_048840	XLOC_048840	novel	Novel_lncRNA	Chr 12	70718033	70718701	-	2	267	45
TCONS_00076536	XLOC_048849	XLOC_048849	novel	Novel_lncRNA	Chr 12	71021530	71029284	-	2	215	71
TCONS_00076590	XLOC_048894	XLOC_048894	novel	Novel_lncRNA	Chr 12	71897669	71904709	-	2	393	91
TCONS_00076599	XLOC_048903	XLOC_048903	novel	Novel_lncRNA	Chr 12	72250055	72307578	-	2	682	49
TCONS_00076600	XLOC_048903	XLOC_048903	novel	Novel_lncRNA	Chr 12	72279484	72307600	-	2	712	71
TCONS_00076742	102188148	PLCB1	protein_coding	Novel_lncRNA	Chr 13	603000	633685	+	3	707	99
TCONS_00076765	XLOC_049005	XLOC_049005	novel	Novel_lncRNA	Chr 13	2994404	3006540	+	2	2050	127
TCONS_00076790	XLOC_049025	XLOC_049025	novel	Novel_lncRNA	Chr 13	4248573	4346005	+	4	293	73
TCONS_00076798	102183340	BTBD3	protein_coding	Novel_lncRNA	Chr 13	5186962	5341047	+	3	955	124
TCONS_00076840	102190888	MACROD2	protein_coding	Novel_lncRNA	Chr 13	7351782	7542956	+	4	992	150
TCONS_00076841	102190888	MACROD2	protein_coding	Novel_lncRNA	Chr 13	7351828	7394263	+	4	1423	130
TCONS_00076842	102190888	MACROD2	protein_coding	Novel_lncRNA	Chr 13	7351843	7450210	+	3	1028	147
TCONS_00076871	102171438	LOC102171438	protein_coding	Novel_lncRNA	Chr 13	10659078	10687763	+	2	651	208
TCONS_00076889	100861023	RBM17	protein_coding	Novel_lncRNA	Chr 13	10866090	10874078	+	2	459	152
TCONS_00076965	102172552	CELF2	protein_coding	Novel_lncRNA	Chr 13	14934979	15018664	+	2	637	97
TCONS_00077008	102173099	PROSER2	protein_coding	Novel_lncRNA	Chr 13	15888408	15895878	+	2	487	101
TCONS_00077066	102178085	ABI1	protein_coding	Novel_lncRNA	Chr 13	17171353	17221639	+	2	1445	79
TCONS_00077187	102188059	PLXDC2	protein_coding	Novel_lncRNA	Chr 13	21096458	21137523	+	4	10888	157
TCONS_00077245	XLOC_049270	XLOC_049270	novel	Novel_lncRNA	Chr 13	23525460	23529039	+	2	829	66
TCONS_00077249	XLOC_049274	XLOC_049274	novel	Novel_lncRNA	Chr 13	23535186	23537415	+	2	1504	190
TCONS_00077331	102171891	THNSL1	protein_coding	Novel_lncRNA	Chr 13	25161255	25222224	+	2	1336	118
TCONS_00077350	XLOC_049347	XLOC_049347	novel	Novel_lncRNA	Chr 13	26456595	26498699	+	3	359	81
TCONS_00077351	XLOC_049347	XLOC_049347	novel	Novel_lncRNA	Chr 13	26472080	26502145	+	4	1459	87
TCONS_00077494	102182803	CACNB2	protein_coding	Novel_lncRNA	Chr 13	32330708	32339237	+	5	2429	111
TCONS_00077496	102182145	NSUN6	protein_coding	Novel_lncRNA	Chr 13	32412624	32416230	+	2	500	78
TCONS_00077498	102183613	EPC1	protein_coding	Novel_lncRNA	Chr 13	32467923	32515528	+	2	5632	137
TCONS_00077502	102183613	EPC1	protein_coding	Novel_lncRNA	Chr 13	32497633	32501628	+	2	2872	186
TCONS_00077539	XLOC_049460	XLOC_049460	novel	Novel_lncRNA	Chr 13	32955244	32960608	+	2	1124	120
TCONS_00077638	XLOC_049531	XLOC_049531	novel	Novel_lncRNA	Chr 13	34266089	34266557	+	2	251	48
TCONS_00077640	XLOC_049533	XLOC_049533	novel	Novel_lncRNA	Chr 13	34348556	34353969	+	2	318	78
TCONS_00077650	XLOC_049541	XLOC_049541	novel	Novel_lncRNA	Chr 13	34635912	34651125	+	2	466	81
TCONS_00077663	XLOC_049553	XLOC_049553	novel	Novel_lncRNA	Chr 13	34739279	34743513	+	2	592	187
TCONS_00077666	XLOC_049556	XLOC_049556	novel	Novel_lncRNA	Chr 13	34751228	34758035	+	2	362	64
TCONS_00077668	XLOC_049558	XLOC_049558	novel	Novel_lncRNA	Chr 13	34768675	34797689	+	3	240	61
TCONS_00077801	102181219	RIN2	protein_coding	Novel_lncRNA	Chr 13	38734226	38751471	+	2	1172	145
TCONS_00077813	102181219	RIN2	protein_coding	Novel_lncRNA	Chr 13	38880135	38919395	+	2	1512	151
TCONS_00077830	102170709	KIZ	protein_coding	Novel_lncRNA	Chr 13	39841366	39844302	+	2	745	131
TCONS_00078000	XLOC_049745	XLOC_049745	novel	Novel_lncRNA	Chr 13	43404351	43457151	+	3	1194	82
TCONS_00078027	102189494	KLF6	protein_coding	Novel_lncRNA	Chr 13	43934641	44017431	+	2	2649	139
TCONS_00078033	XLOC_049777	XLOC_049777	novel	Novel_lncRNA	Chr 13	43983617	43988358	+	2	341	92
TCONS_00078050	XLOC_049788	XLOC_049788	novel	Novel_lncRNA	Chr 13	44377464	44385907	+	2	939	105
TCONS_00078072	XLOC_049800	XLOC_049800	novel	Novel_lncRNA	Chr 13	45689874	45690176	+	2	254	84
TCONS_00078096	102169195	DIP2C	protein_coding	Novel_lncRNA	Chr 13	45926440	45985949	+	3	2994	170
TCONS_00078283	102170333	ADAM33	protein_coding	Novel_lncRNA	Chr 13	50877279	50881775	+	3	4089	137
TCONS_00078290	102170887	C13H20orf194	protein_coding	Novel_lncRNA	Chr 13	51139649	51150255	+	2	10483	195
TCONS_00078305	102182146	ITPA	protein_coding	Novel_lncRNA	Chr 13	51345197	51346192	+	2	378	115
TCONS_00078343	102172555	EBF4	protein_coding	Novel_lncRNA	Chr 13	51768967	51779680	+	2	435	96
TCONS_00078361	102173101	TMC2	protein_coding	Novel_lncRNA	Chr 13	51920932	51935450	+	3	388	79
TCONS_00078513	102171260	COL20A1	protein_coding	Novel_lncRNA	Chr 13	53600600	53601761	+	2	219	73
TCONS_00078514	102171260	COL20A1	protein_coding	Novel_lncRNA	Chr 13	53603802	53607081	+	3	206	68
TCONS_00078545	102189388	OGFR	protein_coding	Novel_lncRNA	Chr 13	53895811	53903286	+	3	1644	143
TCONS_00078553	102184535	SLCO4A1	protein_coding	Novel_lncRNA	Chr 13	54014056	54018394	+	2	4215	312
TCONS_00078554	XLOC_050079	XLOC_050079	novel	Novel_lncRNA	Chr 13	54023336	54031817	+	2	6505	208
TCONS_00078586	XLOC_050097	XLOC_050097	novel	Novel_lncRNA	Chr 13	54246225	54247544	+	4	438	146
TCONS_00078624	XLOC_050128	XLOC_050128	novel	Novel_lncRNA	Chr 13	55036956	55043863	+	2	6392	214
TCONS_00078689	102189972	STX16	protein_coding	Novel_lncRNA	Chr 13	57033363	57038721	+	2	1345	254
TCONS_00078693	102175968	APCDD1L	protein_coding	Novel_lncRNA	Chr 13	57218215	57284454	+	7	984	276
TCONS_00078700	102191534	LOC102191534	protein_coding	Novel_lncRNA	Chr 13	57359503	57394262	+	4	766	98
TCONS_00078713	102191534	LOC102191534	protein_coding	Novel_lncRNA	Chr 13	57410452	57431639	+	7	1867	167
TCONS_00078716	XLOC_050178	XLOC_050178	novel	Novel_lncRNA	Chr 13	57655791	57662637	+	2	221	73
TCONS_00078989	102189323	CBFA2T2	protein_coding	Novel_lncRNA	Chr 13	62545241	62625870	+	2	294	83
TCONS_00079057	XLOC_050384	XLOC_050384	novel	Novel_lncRNA	Chr 13	63831577	63841894	+	2	632	111
TCONS_00079067	XLOC_050386	XLOC_050386	novel	Novel_lncRNA	Chr 13	63945822	63952191	+	2	219	62
TCONS_00079116	102176705	PHF20	protein_coding	Novel_lncRNA	Chr 13	64529078	64531633	+	3	546	116
TCONS_00079117	102176705	PHF20	protein_coding	Novel_lncRNA	Chr 13	64529078	64531633	+	3	550	87
TCONS_00079123	106502784	SCAND1	protein_coding	Novel_lncRNA	Chr 13	64665241	64666580	+	2	1250	196
TCONS_00079217	102183158	NNAT	protein_coding	Novel_lncRNA	Chr 13	66000584	66028304	+	2	536	139
TCONS_00079218	102183158	NNAT	protein_coding	Novel_lncRNA	Chr 13	66000619	66031437	+	3	375	124
TCONS_00079220	102183158	NNAT	protein_coding	Novel_lncRNA	Chr 13	66020814	66028304	+	3	976	163
TCONS_00079237	102179682	VSTM2L	protein_coding	Novel_lncRNA	Chr 13	66368868	66394211	+	2	489	162
TCONS_00079268	106502790	LOC106502790	protein_coding	Novel_lncRNA	Chr 13	66939638	66940569	+	2	846	181
TCONS_00079287	XLOC_050487	XLOC_050487	novel	Novel_lncRNA	Chr 13	67169195	67172877	+	3	316	51
TCONS_00079291	102188419	PPP1R16B	protein_coding	Novel_lncRNA	Chr 13	67193368	67226223	+	2	3150	177
TCONS_00079304	102181055	DHX35	protein_coding	Novel_lncRNA	Chr 13	67401458	67407318	+	2	3839	171
TCONS_00079305	XLOC_050497	XLOC_050497	novel	Novel_lncRNA	Chr 13	67407511	67409314	+	2	1436	153
TCONS_00079318	102181317	MAFB	protein_coding	Novel_lncRNA	Chr 13	68959240	68961221	+	2	1695	408
TCONS_00079409	102171622	ADA	protein_coding	Novel_lncRNA	Chr 13	72567761	72568868	+	2	484	99
TCONS_00079419	106502797	TOMM34	protein_coding	Novel_lncRNA	Chr 13	72873281	72883112	+	2	422	125
TCONS_00079530	102187355	TP53RK	protein_coding	Novel_lncRNA	Chr 13	74885801	74889544	+	3	1512	242
TCONS_00079585	102172079	B4GALT5	protein_coding	Novel_lncRNA	Chr 13	77278182	77281081	+	2	2258	170
TCONS_00079625	XLOC_050681	XLOC_050681	novel	Novel_lncRNA	Chr 13	77774502	77812783	+	2	2265	168
TCONS_00079684	XLOC_050740	XLOC_050740	novel	Novel_lncRNA	Chr 13	77969670	77971429	+	2	1590	170
TCONS_00079724	XLOC_050766	XLOC_050766	novel	Novel_lncRNA	Chr 13	79692895	79824853	+	4	363	90
TCONS_00079725	XLOC_050766	XLOC_050766	novel	Novel_lncRNA	Chr 13	79692895	80019437	+	3	293	63
TCONS_00079778	108637431	TSHZ2	protein_coding	Novel_lncRNA	Chr 13	80110064	80134899	+	2	1737	251
TCONS_00079779	108637431	TSHZ2	protein_coding	Novel_lncRNA	Chr 13	80110093	80123276	+	2	13086	323
TCONS_00079871	102188148	PLCB1	protein_coding	Novel_lncRNA	Chr 13	1424935	1464556	-	2	1116	88
TCONS_00079875	102180505	PLCB4	protein_coding	Novel_lncRNA	Chr 13	2075060	2078592	-	2	349	101
TCONS_00079916	XLOC_050930	XLOC_050930	novel	Novel_lncRNA	Chr 13	6169085	6256058	-	2	340	93
TCONS_00079991	102171438	LOC102171438	protein_coding	Novel_lncRNA	Chr 13	10597101	10606514	-	3	222	45
TCONS_00080003	102171722	IL15RA	protein_coding	Novel_lncRNA	Chr 13	10764132	10773248	-	2	1003	181
TCONS_00080062	102171991	SFMBT2	protein_coding	Novel_lncRNA	Chr 13	11894236	11914127	-	2	1958	132
TCONS_00080065	XLOC_051042	XLOC_051042	novel	Novel_lncRNA	Chr 13	12021882	12028285	-	2	5083	168
TCONS_00080114	102173668	LOC102173668	protein_coding	Novel_lncRNA	Chr 13	16073146	16110595	-	17	4361	923
TCONS_00080179	102177538	PDSS1	protein_coding	Novel_lncRNA	Chr 13	17234961	17236902	-	2	1600	128
TCONS_00080231	XLOC_051133	XLOC_051133	novel	Novel_lncRNA	Chr 13	18612027	18618475	-	2	229	68
TCONS_00080237	XLOC_051139	XLOC_051139	novel	Novel_lncRNA	Chr 13	18915877	18917769	-	3	201	57
TCONS_00080294	XLOC_051176	XLOC_051176	novel	Novel_lncRNA	Chr 13	22583936	22624180	-	2	266	61
TCONS_00080390	102171620	ENKUR	protein_coding	Novel_lncRNA	Chr 13	25205007	25214890	-	2	2520	297
TCONS_00080420	102173757	UCMA	protein_coding	Novel_lncRNA	Chr 13	27242904	27278142	-	7	688	189
TCONS_00080568	XLOC_051396	XLOC_051396	novel	Novel_lncRNA	Chr 13	29975496	30040371	-	2	216	72
TCONS_00080592	102179681	PTER	protein_coding	Novel_lncRNA	Chr 13	30267040	30274220	-	2	385	88
TCONS_00080601	102180136	RSU1	protein_coding	Novel_lncRNA	Chr 13	30410178	30414333	-	3	2714	96
TCONS_00080674	XLOC_051476	XLOC_051476	novel	Novel_lncRNA	Chr 13	32992758	32995397	-	2	348	74
TCONS_00080723	102187960	KIAA1462	protein_coding	Novel_lncRNA	Chr 13	34388118	34392427	-	2	3335	142
TCONS_00080774	102168645	MPP7	protein_coding	Novel_lncRNA	Chr 13	35681612	35700643	-	3	341	97
TCONS_00080812	XLOC_051559	XLOC_051559	novel	Novel_lncRNA	Chr 13	37567530	37578839	-	2	1024	175
TCONS_00080874	102181219	RIN2	protein_coding	Novel_lncRNA	Chr 13	38734095	38750950	-	2	437	73
TCONS_00080970	XLOC_051654	XLOC_051654	novel	Novel_lncRNA	Chr 13	41701172	41705961	-	3	260	66
TCONS_00081026	102188299	LOC102188299	protein_coding	Novel_lncRNA	Chr 13	42857190	42870476	-	3	280	92
TCONS_00081043	102189770	AKR1E2	protein_coding	Novel_lncRNA	Chr 13	43284366	43285780	-	2	1143	116
TCONS_00081078	XLOC_051713	XLOC_051713	novel	Novel_lncRNA	Chr 13	43981299	43988478	-	2	2779	131
TCONS_00081082	102189494	KLF6	protein_coding	Novel_lncRNA	Chr 13	44008653	44012610	-	2	1258	314
TCONS_00081094	XLOC_051723	XLOC_051723	novel	Novel_lncRNA	Chr 13	44215074	44215950	-	2	351	55
TCONS_00081099	XLOC_051728	XLOC_051728	novel	Novel_lncRNA	Chr 13	44376236	44386173	-	2	2433	161
TCONS_00081137	102169195	DIP2C	protein_coding	Novel_lncRNA	Chr 13	45929432	46016417	-	2	592	116
TCONS_00081272	XLOC_051835	XLOC_051835	novel	Novel_lncRNA	Chr 13	50241278	50261558	-	3	2221	115
TCONS_00081273	XLOC_051835	XLOC_051835	novel	Novel_lncRNA	Chr 13	50241278	50261558	-	3	2219	104
TCONS_00081274	XLOC_051835	XLOC_051835	novel	Novel_lncRNA	Chr 13	50241278	50261558	-	3	2268	133
TCONS_00081275	XLOC_051835	XLOC_051835	novel	Novel_lncRNA	Chr 13	50242555	50244255	-	2	218	70
TCONS_00081289	102177729	RNF24	protein_coding	Novel_lncRNA	Chr 13	50601981	50620406	-	2	1532	215
TCONS_00081291	102177729	RNF24	protein_coding	Novel_lncRNA	Chr 13	50629119	50636233	-	2	5140	208
TCONS_00081357	102170887	C13H20orf194	protein_coding	Novel_lncRNA	Chr 13	51139631	51140340	-	2	586	165
TCONS_00081396	102184258	PTPRA	protein_coding	Novel_lncRNA	Chr 13	51630995	51652659	-	2	1063	145
TCONS_00081427	102173101	TMC2	protein_coding	Novel_lncRNA	Chr 13	51873341	51893825	-	3	627	95
TCONS_00081501	XLOC_051956	XLOC_051956	novel	Novel_lncRNA	Chr 13	53152480	53153985	-	2	1423	176
TCONS_00081602	102189663	TCFL5	protein_coding	Novel_lncRNA	Chr 13	53851536	53856108	-	3	918	289
TCONS_00081642	102171801	LAMA5	protein_coding	Novel_lncRNA	Chr 13	54196558	54257537	-	21	3213	1010
TCONS_00081678	102173482	CDH4	protein_coding	Novel_lncRNA	Chr 13	54885134	54974891	-	3	584	124
TCONS_00081681	XLOC_052045	XLOC_052045	novel	Novel_lncRNA	Chr 13	55037328	55038058	-	2	215	71
TCONS_00081720	102188874	LOC102188874	protein_coding	Novel_lncRNA	Chr 13	56791579	56802527	-	3	812	100
TCONS_00081741	102189972	STX16	protein_coding	Novel_lncRNA	Chr 13	57032541	57038346	-	2	1796	129
TCONS_00081760	XLOC_052093	XLOC_052093	novel	Novel_lncRNA	Chr 13	57721727	57722868	-	2	305	93
TCONS_00081810	XLOC_052136	XLOC_052136	novel	Novel_lncRNA	Chr 13	58787242	58788362	-	3	220	72
TCONS_00081900	102178287	HM13	protein_coding	Novel_lncRNA	Chr 13	60395441	60418349	-	3	385	89
TCONS_00082041	108637417	LOC108637417	protein_coding	Novel_lncRNA	Chr 13	62966815	63060718	-	10	10404	298
TCONS_00082042	108637417	LOC108637417	protein_coding	Novel_lncRNA	Chr 13	62966815	63060718	-	11	10452	314
TCONS_00082066	102174133	PIGU	protein_coding	Novel_lncRNA	Chr 13	63499008	63502118	-	5	2350	178
TCONS_00082091	XLOC_052315	XLOC_052315	novel	Novel_lncRNA	Chr 13	63838124	63841907	-	2	1085	86
TCONS_00082104	102176054	MMP24	protein_coding	Novel_lncRNA	Chr 13	64115902	64117653	-	3	1400	155
TCONS_00082105	102176054	MMP24	protein_coding	Novel_lncRNA	Chr 13	64115902	64118069	-	2	2085	175
TCONS_00082168	XLOC_052347	XLOC_052347	novel	Novel_lncRNA	Chr 13	64754862	64760489	-	2	5529	169
TCONS_00082216	102179396	MROH8	protein_coding	Novel_lncRNA	Chr 13	65709771	65734501	-	9	1553	409
TCONS_00082232	102183615	BLCAP	protein_coding	Novel_lncRNA	Chr 13	66000579	66031444	-	4	2961	160
TCONS_00082240	102183615	BLCAP	protein_coding	Novel_lncRNA	Chr 13	66020801	66031444	-	4	3290	164
TCONS_00082241	102183615	BLCAP	protein_coding	Novel_lncRNA	Chr 13	66020801	66031444	-	3	751	164
TCONS_00082313	XLOC_052434	XLOC_052434	novel	Novel_lncRNA	Chr 13	68572503	68580513	-	2	5489	158
TCONS_00082410	102184354	WISP2	protein_coding	Novel_lncRNA	Chr 13	72641901	72651311	-	2	236	49
TCONS_00082435	102174317	TP53TG5	protein_coding	Novel_lncRNA	Chr 13	73183875	73200552	-	4	878	163
TCONS_00082550	102186702	ZMYND8	protein_coding	Novel_lncRNA	Chr 13	75413207	75437358	-	3	361	50
TCONS_00082597	XLOC_052604	XLOC_052604	novel	Novel_lncRNA	Chr 13	76971964	76975798	-	2	580	171
TCONS_00082626	102172369	SPATA2	protein_coding	Novel_lncRNA	Chr 13	77527165	77529196	-	2	294	75
TCONS_00082657	XLOC_052653	XLOC_052653	novel	Novel_lncRNA	Chr 13	77810854	77811629	-	2	472	69
TCONS_00082709	XLOC_052687	XLOC_052687	novel	Novel_lncRNA	Chr 13	78669479	78680934	-	2	265	60
TCONS_00082735	XLOC_052705	XLOC_052705	novel	Novel_lncRNA	Chr 13	79283272	79325415	-	2	559	81
TCONS_00082752	108637361	ZNF217	protein_coding	Novel_lncRNA	Chr 13	80658612	80664298	-	2	3832	176
TCONS_00082760	XLOC_052723	XLOC_052723	novel	Novel_lncRNA	Chr 13	80738409	80739784	-	2	1149	117
TCONS_00082778	XLOC_052733	XLOC_052733	novel	Novel_lncRNA	Chr 13	81433851	81463646	-	2	3079	185
TCONS_00082781	102179493	DOK5	protein_coding	Novel_lncRNA	Chr 13	81463843	81466699	-	2	716	112
TCONS_00082802	XLOC_052752	XLOC_052752	novel	Novel_lncRNA	Chr 14	7151	19315	+	2	480	75
TCONS_00082809	XLOC_052752	XLOC_052752	novel	Novel_lncRNA	Chr 14	18092	19315	+	2	474	65
TCONS_00082836	102177816	DEPTOR	protein_coding	Novel_lncRNA	Chr 14	932600	937295	+	2	1354	152
TCONS_00082837	102177816	DEPTOR	protein_coding	Novel_lncRNA	Chr 14	932600	937295	+	2	3265	154
TCONS_00082839	102177816	DEPTOR	protein_coding	Novel_lncRNA	Chr 14	932600	937295	+	3	2019	209
TCONS_00082841	102177816	DEPTOR	protein_coding	Novel_lncRNA	Chr 14	933033	937295	+	3	2181	174
TCONS_00082842	102177816	DEPTOR	protein_coding	Novel_lncRNA	Chr 14	933041	937295	+	2	2844	304
TCONS_00082908	102173584	LRRCC1	protein_coding	Novel_lncRNA	Chr 14	4678451	4718255	+	2	266	88
TCONS_00082924	XLOC_052820	XLOC_052820	novel	Novel_lncRNA	Chr 14	5137283	5140558	+	2	1734	96
TCONS_00082928	XLOC_052824	XLOC_052824	novel	Novel_lncRNA	Chr 14	5195592	5201795	+	3	640	71
TCONS_00082929	XLOC_052824	XLOC_052824	novel	Novel_lncRNA	Chr 14	5195904	5202257	+	3	968	83
TCONS_00082930	XLOC_052824	XLOC_052824	novel	Novel_lncRNA	Chr 14	5196651	5202257	+	3	748	103
TCONS_00082935	102173951	LOC102173951	protein_coding	Novel_lncRNA	Chr 14	5717656	5722607	+	2	261	53
TCONS_00083136	XLOC_052953	XLOC_052953	novel	Novel_lncRNA	Chr 14	13997140	14001222	+	2	385	107
TCONS_00083260	XLOC_053038	XLOC_053038	novel	Novel_lncRNA	Chr 14	18308139	18315934	+	2	212	70
TCONS_00083355	XLOC_053118	XLOC_053118	novel	Novel_lncRNA	Chr 14	21870244	21871313	+	2	643	149
TCONS_00083370	102190975	OXR1	protein_coding	Novel_lncRNA	Chr 14	23784163	24115923	+	4	563	107
TCONS_00083371	102190975	OXR1	protein_coding	Novel_lncRNA	Chr 14	23784163	24115923	+	5	656	107
TCONS_00083447	XLOC_053183	XLOC_053183	novel	Novel_lncRNA	Chr 14	31328135	31457412	+	3	903	86
TCONS_00083496	XLOC_053230	XLOC_053230	novel	Novel_lncRNA	Chr 14	31497961	31500004	+	2	1489	96
TCONS_00083592	102182809	EXT1	protein_coding	Novel_lncRNA	Chr 14	35916425	35920692	+	2	2023	346
TCONS_00083603	XLOC_053332	XLOC_053332	novel	Novel_lncRNA	Chr 14	36840001	36846358	+	2	4941	156
TCONS_00083645	102179496	ZNF704	protein_coding	Novel_lncRNA	Chr 14	37966963	37972286	+	2	266	88
TCONS_00083722	102180407	ZFHX4	protein_coding	Novel_lncRNA	Chr 14	42247474	42287139	+	5	687	130
TCONS_00083808	106502845	C14H8orf89	protein_coding	Novel_lncRNA	Chr 14	45516310	45527024	+	3	1155	90
TCONS_00083862	102175042	PREX2	protein_coding	Novel_lncRNA	Chr 14	50037676	50040410	+	2	239	75
TCONS_00083884	108637481	LOC108637481	protein_coding	Novel_lncRNA	Chr 14	51012393	51019936	+	5	640	127
TCONS_00083912	102169610	PDE7A	protein_coding	Novel_lncRNA	Chr 14	51897411	51911292	+	2	921	223
TCONS_00083948	102191152	LOC102191152	protein_coding	Novel_lncRNA	Chr 14	52641383	52668821	+	2	379	126
TCONS_00083995	XLOC_053601	XLOC_053601	novel	Novel_lncRNA	Chr 14	55807784	55808565	+	2	218	62
TCONS_00084008	102188421	NSMAF	protein_coding	Novel_lncRNA	Chr 14	57251301	57283154	+	6	1508	200
TCONS_00084063	XLOC_053645	XLOC_053645	novel	Novel_lncRNA	Chr 14	59839281	59848969	+	2	437	145
TCONS_00084099	XLOC_053672	XLOC_053672	novel	Novel_lncRNA	Chr 14	60638919	60688141	+	2	218	72
TCONS_00084201	XLOC_053742	XLOC_053742	novel	Novel_lncRNA	Chr 14	65263617	65271251	+	2	3911	145
TCONS_00084202	XLOC_053742	XLOC_053742	novel	Novel_lncRNA	Chr 14	65263692	65271251	+	3	1107	161
TCONS_00084258	102191253	KLHL38	protein_coding	Novel_lncRNA	Chr 14	65766058	65795080	+	2	336	111
TCONS_00084361	102186780	NSMCE2	protein_coding	Novel_lncRNA	Chr 14	66893391	67026245	+	32	4657	1165
TCONS_00084500	XLOC_053962	XLOC_053962	novel	Novel_lncRNA	Chr 14	75001089	75001531	+	2	316	101
TCONS_00084503	XLOC_053965	XLOC_053965	novel	Novel_lncRNA	Chr 14	75013978	75015261	+	3	412	93
TCONS_00084519	106502836	TRAPPC9	protein_coding	Novel_lncRNA	Chr 14	78933106	78935251	+	2	894	158
TCONS_00084571	102184142	TSNARE1	protein_coding	Novel_lncRNA	Chr 14	80335673	80337905	+	2	2058	214
TCONS_00084670	106504013	PLEC	protein_coding	Novel_lncRNA	Chr 14	81072420	81083587	+	2	1050	235
TCONS_00084671	106504013	PLEC	protein_coding	Novel_lncRNA	Chr 14	81072420	81100908	+	2	542	180
TCONS_00084705	108637538	SCX	protein_coding	Novel_lncRNA	Chr 14	81291225	81300085	+	14	1917	635
TCONS_00084966	XLOC_054203	XLOC_054203	novel	Novel_lncRNA	Chr 14	7177	19063	-	2	202	66
TCONS_00084968	XLOC_054205	XLOC_054205	novel	Novel_lncRNA	Chr 14	11872	12752	-	2	379	64
TCONS_00085000	XLOC_054226	XLOC_054226	novel	Novel_lncRNA	Chr 14	755341	756295	-	2	690	87
TCONS_00085001	XLOC_054226	XLOC_054226	novel	Novel_lncRNA	Chr 14	756058	758995	-	2	2832	169
TCONS_00085015	102177816	DEPTOR	protein_coding	Novel_lncRNA	Chr 14	924046	937052	-	3	11742	304
TCONS_00085016	102177816	DEPTOR	protein_coding	Novel_lncRNA	Chr 14	924046	937052	-	4	10223	281
TCONS_00085017	102177816	DEPTOR	protein_coding	Novel_lncRNA	Chr 14	925197	937072	-	3	10196	304
TCONS_00085088	102174762	LOC102174762	protein_coding	Novel_lncRNA	Chr 14	5163310	5228978	-	2	326	108
TCONS_00085090	XLOC_054277	XLOC_054277	novel	Novel_lncRNA	Chr 14	5181488	5201720	-	4	2258	126
TCONS_00085095	XLOC_054277	XLOC_054277	novel	Novel_lncRNA	Chr 14	5195350	5201729	-	3	816	73
TCONS_00085096	XLOC_054277	XLOC_054277	novel	Novel_lncRNA	Chr 14	5195350	5202255	-	2	1764	121
TCONS_00085097	XLOC_054277	XLOC_054277	novel	Novel_lncRNA	Chr 14	5195350	5202255	-	3	1520	83
TCONS_00085098	XLOC_054277	XLOC_054277	novel	Novel_lncRNA	Chr 14	5196661	5202255	-	2	980	121
TCONS_00085100	XLOC_054283	XLOC_054283	novel	Novel_lncRNA	Chr 14	5410461	5412990	-	2	798	156
TCONS_00085120	102172081	RMDN1	protein_coding	Novel_lncRNA	Chr 14	6004811	6015807	-	2	631	139
TCONS_00085175	102191255	C14H8orf88	protein_coding	Novel_lncRNA	Chr 14	8732794	8764096	-	7	1482	124
TCONS_00085192	XLOC_054344	XLOC_054344	novel	Novel_lncRNA	Chr 14	10310032	10366793	-	2	340	95
TCONS_00085497	XLOC_054559	XLOC_054559	novel	Novel_lncRNA	Chr 14	19005867	19027303	-	2	21361	245
TCONS_00085631	XLOC_054654	XLOC_054654	novel	Novel_lncRNA	Chr 14	25865199	25871132	-	2	4874	117
TCONS_00085659	102186413	EBAG9	protein_coding	Novel_lncRNA	Chr 14	27348409	27349175	-	2	369	122
TCONS_00085732	102184828	SLC30A8	protein_coding	Novel_lncRNA	Chr 14	34868099	34972024	-	2	223	74
TCONS_00085759	XLOC_054757	XLOC_054757	novel	Novel_lncRNA	Chr 14	36840065	36841795	-	2	314	92
TCONS_00085822	XLOC_054813	XLOC_054813	novel	Novel_lncRNA	Chr 14	40108139	40108627	-	2	430	97
TCONS_00085856	102180407	ZFHX4	protein_coding	Novel_lncRNA	Chr 14	42247376	42257898	-	2	471	149
TCONS_00085864	102174675	PI15	protein_coding	Novel_lncRNA	Chr 14	43866123	43903029	-	2	1219	89
TCONS_00085881	102183527	GDAP1	protein_coding	Novel_lncRNA	Chr 14	44467883	44492968	-	3	3494	146
TCONS_00085882	102183527	GDAP1	protein_coding	Novel_lncRNA	Chr 14	44490210	44492968	-	3	542	127
TCONS_00085989	102173764	CSPP1	protein_coding	Novel_lncRNA	Chr 14	50870358	50885533	-	2	693	204
TCONS_00086051	102191152	LOC102191152	protein_coding	Novel_lncRNA	Chr 14	52641392	52704664	-	2	282	94
TCONS_00086055	XLOC_054960	XLOC_054960	novel	Novel_lncRNA	Chr 14	53726996	53744313	-	3	209	63
TCONS_00086087	102189884	CLVS1	protein_coding	Novel_lncRNA	Chr 14	54946247	55111066	-	25	6994	741
TCONS_00086239	102179023	C14H8orf22	protein_coding	Novel_lncRNA	Chr 14	62059524	62065318	-	4	3569	131
TCONS_00086277	102170334	HAS2	protein_coding	Novel_lncRNA	Chr 14	63960847	63975351	-	3	2398	122
TCONS_00086308	XLOC_055152	XLOC_055152	novel	Novel_lncRNA	Chr 14	65270056	65285939	-	3	2562	155
TCONS_00086350	XLOC_055182	XLOC_055182	novel	Novel_lncRNA	Chr 14	65723965	65724833	-	2	387	59
TCONS_00086353	XLOC_055185	XLOC_055185	novel	Novel_lncRNA	Chr 14	65756818	65759067	-	2	374	107
TCONS_00086392	102173483	TMEM65	protein_coding	Novel_lncRNA	Chr 14	66318395	66346958	-	3	2920	330
TCONS_00086439	102172644	TRIB1	protein_coding	Novel_lncRNA	Chr 14	67241525	67244542	-	3	881	118
TCONS_00086506	102183980	TMEM71	protein_coding	Novel_lncRNA	Chr 14	73419556	73423003	-	3	619	84
TCONS_00086688	102186031	RHPN1	protein_coding	Novel_lncRNA	Chr 14	80780532	80782376	-	2	1048	151
TCONS_00086916	102184825	OGFRL1	protein_coding	Novel_lncRNA	Chr 14	92044713	92078647	-	3	1135	304
TCONS_00086917	102184825	OGFRL1	protein_coding	Novel_lncRNA	Chr 14	92065034	92078797	-	3	1506	380
TCONS_00086924	XLOC_055515	XLOC_055515	novel	Novel_lncRNA	Chr 14	92133475	92133860	-	2	330	55
TCONS_00086966	102178558	NCAPD3	protein_coding	Novel_lncRNA	Chr 15	67448	69864	+	4	839	125
TCONS_00086977	102171899	LOC102171899	protein_coding	Novel_lncRNA	Chr 15	325619	326656	+	2	483	143
TCONS_00087000	XLOC_055570	XLOC_055570	novel	Novel_lncRNA	Chr 15	686336	686717	+	2	350	61
TCONS_00087026	102190715	DTX4	protein_coding	Novel_lncRNA	Chr 15	1116416	1118335	+	2	1858	171
TCONS_00087030	102190715	DTX4	protein_coding	Novel_lncRNA	Chr 15	1157010	1159001	+	2	870	188
TCONS_00087107	102172174	TMX2	protein_coding	Novel_lncRNA	Chr 15	2344950	2345435	+	2	305	83
TCONS_00087122	102181617	UBE2L6	protein_coding	Novel_lncRNA	Chr 15	2468401	2469358	+	2	850	135
TCONS_00087151	102181062	SLC43A1	protein_coding	Novel_lncRNA	Chr 15	2539893	2545869	+	2	1012	197
TCONS_00087198	106502927	LRRC55	protein_coding	Novel_lncRNA	Chr 15	2875684	2882872	+	2	2199	210
TCONS_00087199	XLOC_055696	XLOC_055696	novel	Novel_lncRNA	Chr 15	2875976	2876473	+	2	385	69
TCONS_00087295	102188333	MTCH2	protein_coding	Novel_lncRNA	Chr 15	5557372	5564305	+	4	1967	159
TCONS_00087346	XLOC_055797	XLOC_055797	novel	Novel_lncRNA	Chr 15	5766243	5767472	+	2	598	83
TCONS_00087360	102171997	ACP2	protein_coding	Novel_lncRNA	Chr 15	5867823	5876079	+	2	7989	207
TCONS_00087389	102184742	ARHGAP1	protein_coding	Novel_lncRNA	Chr 15	6339369	6340434	+	2	457	87
TCONS_00087458	102183085	CRY2	protein_coding	Novel_lncRNA	Chr 15	7091641	7094282	+	3	878	128
TCONS_00087491	XLOC_055856	XLOC_055856	novel	Novel_lncRNA	Chr 15	8362149	8378942	+	2	833	134
TCONS_00087546	102173867	RAG2	protein_coding	Novel_lncRNA	Chr 15	15839299	15908934	+	7	947	244
TCONS_00087547	102173867	RAG2	protein_coding	Novel_lncRNA	Chr 15	15839302	15908934	+	6	872	220
TCONS_00087548	102173867	RAG2	protein_coding	Novel_lncRNA	Chr 15	15839302	15908934	+	6	801	155
TCONS_00087549	102173867	RAG2	protein_coding	Novel_lncRNA	Chr 15	15866494	15908934	+	3	384	74
TCONS_00087569	XLOC_055922	XLOC_055922	novel	Novel_lncRNA	Chr 15	16202384	16217551	+	2	207	63
TCONS_00087677	102189606	CSTF3	protein_coding	Novel_lncRNA	Chr 15	19138556	19163498	+	3	6904	101
TCONS_00087678	102189606	CSTF3	protein_coding	Novel_lncRNA	Chr 15	19138556	19174351	+	4	2575	98
TCONS_00087759	102180782	BDNF	protein_coding	Novel_lncRNA	Chr 15	24525970	24526573	+	2	415	138
TCONS_00087796	102176712	LRRC32	protein_coding	Novel_lncRNA	Chr 15	26874958	26882295	+	3	308	96
TCONS_00087936	102169613	LIPT2	protein_coding	Novel_lncRNA	Chr 15	29197382	29198706	+	2	1015	111
TCONS_00087954	102185942	P4HA3	protein_coding	Novel_lncRNA	Chr 15	29393600	29398774	+	4	1087	134
TCONS_00088227	102170446	LOC102170446	protein_coding	Novel_lncRNA	Chr 15	34623404	34627997	+	3	305	76
TCONS_00088304	106503055	TIMM10B	protein_coding	Novel_lncRNA	Chr 15	35778048	35780484	+	2	1960	132
TCONS_00088330	102175225	LOC102175225	protein_coding	Novel_lncRNA	Chr 15	35980567	36038760	+	2	883	70
TCONS_00088333	108633278	LOC108633278	protein_coding	Novel_lncRNA	Chr 15	35983015	36125521	+	2	3949	1315
TCONS_00088334	108633278	LOC108633278	protein_coding	Novel_lncRNA	Chr 15	35985077	36125521	+	2	1887	628
TCONS_00088335	102175225	LOC102175225	protein_coding	Novel_lncRNA	Chr 15	35985384	36044824	+	2	754	251
TCONS_00088336	108633278	LOC108633278	protein_coding	Novel_lncRNA	Chr 15	35985384	36125521	+	2	1580	526
TCONS_00088337	102184922	LOC102184922	protein_coding	Novel_lncRNA	Chr 15	35985384	36208174	+	3	787	262
TCONS_00088338	102175225	LOC102175225	protein_coding	Novel_lncRNA	Chr 15	35985988	36045930	+	2	1256	418
TCONS_00088339	108633278	LOC108633278	protein_coding	Novel_lncRNA	Chr 15	35985988	36125521	+	2	973	323
TCONS_00088343	102184922	LOC102184922	protein_coding	Novel_lncRNA	Chr 15	35987443	36211289	+	3	1849	539
TCONS_00088345	102184922	LOC102184922	protein_coding	Novel_lncRNA	Chr 15	35987443	36266660	+	3	2044	469
TCONS_00088346	102184922	LOC102184922	protein_coding	Novel_lncRNA	Chr 15	35987443	36266660	+	2	1974	469
TCONS_00088348	102175225	LOC102175225	protein_coding	Novel_lncRNA	Chr 15	35988154	36082516	+	2	1183	232
TCONS_00088350	102184922	LOC102184922	protein_coding	Novel_lncRNA	Chr 15	35988170	36211289	+	3	1122	297
TCONS_00088351	108633278	LOC108633278	protein_coding	Novel_lncRNA	Chr 15	36016164	36176626	+	2	229	61
TCONS_00088353	108633278	LOC108633278	protein_coding	Novel_lncRNA	Chr 15	36041035	36125521	+	2	4616	1538
TCONS_00088354	102184922	LOC102184922	protein_coding	Novel_lncRNA	Chr 15	36041035	36205329	+	3	978	326
TCONS_00088357	102184922	LOC102184922	protein_coding	Novel_lncRNA	Chr 15	36047630	36211289	+	3	350	65
TCONS_00088363	102184922	LOC102184922	protein_coding	Novel_lncRNA	Chr 15	36125635	36211289	+	2	2220	662
TCONS_00088454	XLOC_056467	XLOC_056467	novel	Novel_lncRNA	Chr 15	38153787	38154316	+	2	226	74
TCONS_00088461	102182708	AKIP1	protein_coding	Novel_lncRNA	Chr 15	38712082	38716159	+	3	1221	138
TCONS_00088580	XLOC_056556	XLOC_056556	novel	Novel_lncRNA	Chr 15	41670930	41671434	+	2	236	78
TCONS_00088582	102172084	LOC102172084	protein_coding	Novel_lncRNA	Chr 15	41724245	41778911	+	3	1999	155
TCONS_00088585	102172084	LOC102172084	protein_coding	Novel_lncRNA	Chr 15	41724250	41742025	+	2	383	82
TCONS_00088659	102191155	LOC102191155	protein_coding	Novel_lncRNA	Chr 15	43897860	43976755	+	6	2408	269
TCONS_00088672	102190621	LOC102190621	protein_coding	Novel_lncRNA	Chr 15	44453326	44476005	+	2	825	274
TCONS_00088675	100860822	CRSP-2	protein_coding	Novel_lncRNA	Chr 15	44618971	44717311	+	2	218	58
TCONS_00088695	XLOC_056615	XLOC_056615	novel	Novel_lncRNA	Chr 15	46527725	46529064	+	2	341	73
TCONS_00088741	102183617	ZNF202	protein_coding	Novel_lncRNA	Chr 15	48003256	48007522	+	2	1714	89
TCONS_00088778	102187611	UBASH3B	protein_coding	Novel_lncRNA	Chr 15	48991620	49039657	+	2	1602	289
TCONS_00089039	102182328	CADM1	protein_coding	Novel_lncRNA	Chr 15	56276663	56389126	+	2	1283	110
TCONS_00089040	102182328	CADM1	protein_coding	Novel_lncRNA	Chr 15	56277081	56286075	+	2	780	110
TCONS_00089118	102177818	NCAM1	protein_coding	Novel_lncRNA	Chr 15	58660931	58908142	+	2	522	109
TCONS_00089138	XLOC_056890	XLOC_056890	novel	Novel_lncRNA	Chr 15	59955915	59959395	+	2	654	95
TCONS_00089139	XLOC_056890	XLOC_056890	novel	Novel_lncRNA	Chr 15	59955921	59959395	+	2	652	95
TCONS_00089147	102174859	TIMM8B	protein_coding	Novel_lncRNA	Chr 15	59969349	59979517	+	4	2658	164
TCONS_00089213	102169032	ARHGAP20	protein_coding	Novel_lncRNA	Chr 15	61555131	61597805	+	3	788	133
TCONS_00089223	102168557	RDX	protein_coding	Novel_lncRNA	Chr 15	62085994	62105368	+	2	14394	136
TCONS_00089224	102168557	RDX	protein_coding	Novel_lncRNA	Chr 15	62101002	62105368	+	2	1134	100
TCONS_00089365	102181797	CEP57	protein_coding	Novel_lncRNA	Chr 15	67862426	67869939	+	2	1706	97
TCONS_00089401	102175599	PGR	protein_coding	Novel_lncRNA	Chr 15	74543869	74611099	+	3	3881	116
TCONS_00089467	102168367	DDI1	protein_coding	Novel_lncRNA	Chr 15	77902735	78186242	+	7	4237	479
TCONS_00089472	102191717	LOC102191717	protein_coding	Novel_lncRNA	Chr 15	79223481	79224127	+	2	311	51
TCONS_00089479	102185014	KBTBD3	protein_coding	Novel_lncRNA	Chr 15	80885402	80936975	+	2	513	167
TCONS_00089480	102190336	AASDHPPT	protein_coding	Novel_lncRNA	Chr 15	80937259	80950061	+	3	4988	172
TCONS_00089518	XLOC_057138	XLOC_057138	novel	Novel_lncRNA	Chr 15	315763	319344	-	2	224	69
TCONS_00089524	102171633	MS4A2	protein_coding	Novel_lncRNA	Chr 15	368354	370445	-	2	638	112
TCONS_00089646	102181617	UBE2L6	protein_coding	Novel_lncRNA	Chr 15	2448260	2456921	-	2	1311	119
TCONS_00090133	102168926	NAT10	protein_coding	Novel_lncRNA	Chr 15	18221110	18225723	-	5	474	84
TCONS_00090200	102183253	DNAJC24	protein_coding	Novel_lncRNA	Chr 15	20725481	20761411	-	3	853	107
TCONS_00090466	102182710	PLEKHB1	protein_coding	Novel_lncRNA	Chr 15	29883028	29892050	-	4	1510	168
TCONS_00090472	102191820	RELT	protein_coding	Novel_lncRNA	Chr 15	29930944	30138307	-	9	11144	306
TCONS_00090565	102169686	ART5	protein_coding	Novel_lncRNA	Chr 15	31915183	31916296	-	3	382	112
TCONS_00090573	102168842	ART1	protein_coding	Novel_lncRNA	Chr 15	31961283	31967891	-	2	2558	100
TCONS_00090799	102175225	LOC102175225	protein_coding	Novel_lncRNA	Chr 15	35980417	36038809	-	2	1082	86
TCONS_00090843	XLOC_057986	XLOC_057986	novel	Novel_lncRNA	Chr 15	36283251	36283833	-	2	559	56
TCONS_00090869	102171629	SYT9	protein_coding	Novel_lncRNA	Chr 15	36940388	37019128	-	2	918	255
TCONS_00090908	XLOC_058031	XLOC_058031	novel	Novel_lncRNA	Chr 15	38153768	38154547	-	2	476	133
TCONS_00091002	102178749	SBF2	protein_coding	Novel_lncRNA	Chr 15	39796775	39983123	-	3	2940	156
TCONS_00091003	102178749	SBF2	protein_coding	Novel_lncRNA	Chr 15	39830355	39983123	-	3	845	119
TCONS_00091004	102178749	SBF2	protein_coding	Novel_lncRNA	Chr 15	39875221	39983123	-	3	11783	128
TCONS_00091258	XLOC_058228	XLOC_058228	novel	Novel_lncRNA	Chr 15	48355863	48374136	-	2	338	93
TCONS_00091262	102182518	CLMP	protein_coding	Novel_lncRNA	Chr 15	48540431	48565042	-	2	384	128
TCONS_00091337	XLOC_058284	XLOC_058284	novel	Novel_lncRNA	Chr 15	52365596	52370670	-	2	232	67
TCONS_00091467	102182329	SCN4B	protein_coding	Novel_lncRNA	Chr 15	53491865	53493838	-	2	341	98
TCONS_00091522	XLOC_058381	XLOC_058381	novel	Novel_lncRNA	Chr 15	55541713	55554181	-	3	338	58
TCONS_00091525	XLOC_058384	XLOC_058384	novel	Novel_lncRNA	Chr 15	56109673	56120632	-	3	282	93
TCONS_00091621	XLOC_058444	XLOC_058444	novel	Novel_lncRNA	Chr 15	59647955	59674518	-	2	247	82
TCONS_00091675	102175422	LAYN	protein_coding	Novel_lncRNA	Chr 15	60497109	60521393	-	3	1134	153
TCONS_00091748	XLOC_058519	XLOC_058519	novel	Novel_lncRNA	Chr 15	65083226	65086303	-	2	529	89
TCONS_00091792	XLOC_058554	XLOC_058554	novel	Novel_lncRNA	Chr 15	66560356	66582576	-	2	582	119
TCONS_00091822	102181797	CEP57	protein_coding	Novel_lncRNA	Chr 15	67862437	67868580	-	2	336	93
TCONS_00092045	106502935	LOC106502935	protein_coding	Novel_lncRNA	Chr 16	793768	851527	+	2	910	185
TCONS_00092046	106502935	LOC106502935	protein_coding	Novel_lncRNA	Chr 16	794054	797962	+	2	293	97
TCONS_00092048	106502935	LOC106502935	protein_coding	Novel_lncRNA	Chr 16	840846	851527	+	2	782	122
TCONS_00092057	XLOC_058714	XLOC_058714	novel	Novel_lncRNA	Chr 16	915658	917188	+	2	293	85
TCONS_00092061	106502946	ATP2B4	protein_coding	Novel_lncRNA	Chr 16	923290	925257	+	2	546	79
TCONS_00092145	102181324	CNTN2	protein_coding	Novel_lncRNA	Chr 16	2217111	2218982	+	2	478	105
TCONS_00092262	102177549	YOD1	protein_coding	Novel_lncRNA	Chr 16	4228990	4229986	+	2	743	193
TCONS_00092319	102184713	LOC102184713	protein_coding	Novel_lncRNA	Chr 16	5041424	5052205	+	2	291	72
TCONS_00092320	108637766	LOC108637766	protein_coding	Novel_lncRNA	Chr 16	5110900	5340565	+	6	1074	259
TCONS_00092321	108637766	LOC108637766	protein_coding	Novel_lncRNA	Chr 16	5128370	5153629	+	2	251	83
TCONS_00092383	XLOC_058890	XLOC_058890	novel	Novel_lncRNA	Chr 16	11022166	11061534	+	4	544	127
TCONS_00092625	XLOC_059104	XLOC_059104	novel	Novel_lncRNA	Chr 16	23930258	23932463	+	2	1184	102
TCONS_00092632	XLOC_059109	XLOC_059109	novel	Novel_lncRNA	Chr 16	24079017	24084127	+	2	4173	114
TCONS_00092633	XLOC_059109	XLOC_059109	novel	Novel_lncRNA	Chr 16	24079017	24084127	+	2	4173	114
TCONS_00092708	XLOC_059150	XLOC_059150	novel	Novel_lncRNA	Chr 16	27060191	27060630	+	2	320	106
TCONS_00092713	102188068	LOC102188068	protein_coding	Novel_lncRNA	Chr 16	27063694	27064978	+	2	603	107
TCONS_00092803	102171177	SMYD3	protein_coding	Novel_lncRNA	Chr 16	29383846	29389862	+	2	3316	107
TCONS_00092804	102171177	SMYD3	protein_coding	Novel_lncRNA	Chr 16	29383846	29389862	+	2	3363	107
TCONS_00092814	102186789	KIF26B	protein_coding	Novel_lncRNA	Chr 16	30324164	30350877	+	2	211	66
TCONS_00092821	102171635	EFCAB2	protein_coding	Novel_lncRNA	Chr 16	30854270	30858430	+	2	2443	169
TCONS_00092853	XLOC_059237	XLOC_059237	novel	Novel_lncRNA	Chr 16	31267185	31292804	+	2	458	84
TCONS_00092926	XLOC_059283	XLOC_059283	novel	Novel_lncRNA	Chr 16	34731252	34733691	+	2	354	60
TCONS_00092927	XLOC_059284	XLOC_059284	novel	Novel_lncRNA	Chr 16	34744423	34760797	+	3	511	61
TCONS_00093045	XLOC_059372	XLOC_059372	novel	Novel_lncRNA	Chr 16	37454691	37504076	+	2	205	64
TCONS_00093166	102169206	FBXO2	protein_coding	Novel_lncRNA	Chr 16	40501484	40790732	+	2	339	98
TCONS_00093189	108637737	C16H1orf127	protein_coding	Novel_lncRNA	Chr 16	41145834	41165074	+	4	11948	271
TCONS_00093190	108637737	C16H1orf127	protein_coding	Novel_lncRNA	Chr 16	41145834	41165074	+	6	6023	204
TCONS_00093255	102177823	TMEM201	protein_coding	Novel_lncRNA	Chr 16	42381931	42385235	+	2	621	120
TCONS_00093283	108637775	LOC108637775	protein_coding	Novel_lncRNA	Chr 16	42779713	42782709	+	2	237	78
TCONS_00093289	XLOC_059502	XLOC_059502	novel	Novel_lncRNA	Chr 16	42804950	42806083	+	2	332	91
TCONS_00093415	102182429	AJAP1	protein_coding	Novel_lncRNA	Chr 16	47050432	47058116	+	2	214	68
TCONS_00093519	106502965	LOC106502965	protein_coding	Novel_lncRNA	Chr 16	49445131	49451365	+	3	392	77
TCONS_00093650	108637740	LOC108637740	protein_coding	Novel_lncRNA	Chr 16	50220145	50245756	+	2	1066	158
TCONS_00093658	102172648	FBLIM1	protein_coding	Novel_lncRNA	Chr 16	50295587	50299580	+	2	277	92
TCONS_00093768	102179584	RC3H1	protein_coding	Novel_lncRNA	Chr 16	53854168	53885205	+	2	473	125
TCONS_00093867	102186140	ABL2	protein_coding	Novel_lncRNA	Chr 16	59123368	59157610	+	3	551	143
TCONS_00093868	102186791	SOAT1	protein_coding	Novel_lncRNA	Chr 16	59203692	59219295	+	3	402	102
TCONS_00094049	102173025	RGL1	protein_coding	Novel_lncRNA	Chr 16	63451831	63487974	+	3	537	114
TCONS_00094066	102173871	C16H1orf21	protein_coding	Novel_lncRNA	Chr 16	64039635	64126419	+	2	19566	138
TCONS_00094114	XLOC_060003	XLOC_060003	novel	Novel_lncRNA	Chr 16	65082143	65105692	+	2	830	90
TCONS_00094202	XLOC_060063	XLOC_060063	novel	Novel_lncRNA	Chr 16	67933181	67943433	+	3	626	86
TCONS_00094203	XLOC_060063	XLOC_060063	novel	Novel_lncRNA	Chr 16	67936313	67965881	+	3	583	95
TCONS_00094221	102180144	PROX1	protein_coding	Novel_lncRNA	Chr 16	68224212	68239553	+	2	2009	583
TCONS_00094299	XLOC_060143	XLOC_060143	novel	Novel_lncRNA	Chr 16	69742168	69745612	+	2	3425	182
TCONS_00094312	102185204	TMEM206	protein_coding	Novel_lncRNA	Chr 16	69831156	69837995	+	2	462	78
TCONS_00094346	XLOC_060170	XLOC_060170	novel	Novel_lncRNA	Chr 16	70761399	70767528	+	3	2939	176
TCONS_00094347	XLOC_060170	XLOC_060170	novel	Novel_lncRNA	Chr 16	70761411	70782148	+	5	1220	144
TCONS_00094348	XLOC_060170	XLOC_060170	novel	Novel_lncRNA	Chr 16	70761419	70767528	+	3	5683	144
TCONS_00094352	XLOC_060170	XLOC_060170	novel	Novel_lncRNA	Chr 16	70776161	70782148	+	2	393	67
TCONS_00094404	102168932	PLXNA2	protein_coding	Novel_lncRNA	Chr 16	73724198	73749323	+	2	977	185
TCONS_00094503	XLOC_060276	XLOC_060276	novel	Novel_lncRNA	Chr 16	77719648	77730956	+	3	396	79
TCONS_00094520	XLOC_060290	XLOC_060290	novel	Novel_lncRNA	Chr 16	77883554	77884429	+	2	441	147
TCONS_00094551	XLOC_060311	XLOC_060311	novel	Novel_lncRNA	Chr 16	78176758	78179463	+	2	528	119
TCONS_00094690	102186707	LOC102186707	protein_coding	Novel_lncRNA	Chr 16	64609	107740	-	3	259	82
TCONS_00094708	102181801	ADORA1	protein_coding	Novel_lncRNA	Chr 16	294428	332612	-	2	753	250
TCONS_00094742	106502935	LOC106502935	protein_coding	Novel_lncRNA	Chr 16	785085	796620	-	2	648	164
TCONS_00094907	102183809	IKBKE	protein_coding	Novel_lncRNA	Chr 16	3615568	3618182	-	2	213	70
TCONS_00095030	102176810	USH2A	protein_coding	Novel_lncRNA	Chr 16	17416174	17418868	-	2	1280	119
TCONS_00095082	XLOC_060668	XLOC_060668	novel	Novel_lncRNA	Chr 16	18789733	18791019	-	2	1027	97
TCONS_00095313	102182522	DISP1	protein_coding	Novel_lncRNA	Chr 16	24799660	24886786	-	2	453	86
TCONS_00095324	100860844	TLR5	protein_coding	Novel_lncRNA	Chr 16	25111851	25124298	-	4	1043	154
TCONS_00095358	102185109	CNIH4	protein_coding	Novel_lncRNA	Chr 16	26036373	26037587	-	2	207	69
TCONS_00095415	102188242	SRP9	protein_coding	Novel_lncRNA	Chr 16	27369046	27379466	-	2	1750	94
TCONS_00095460	XLOC_060960	XLOC_060960	novel	Novel_lncRNA	Chr 16	28389769	28404408	-	2	281	90
TCONS_00095534	102187069	LOC102187069	protein_coding	Novel_lncRNA	Chr 16	30961315	30968035	-	4	1308	84
TCONS_00095537	102187069	LOC102187069	protein_coding	Novel_lncRNA	Chr 16	30961315	30968346	-	4	1414	110
TCONS_00095588	XLOC_061043	XLOC_061043	novel	Novel_lncRNA	Chr 16	34755496	34760792	-	2	242	55
TCONS_00095594	XLOC_061049	XLOC_061049	novel	Novel_lncRNA	Chr 16	34778844	34781366	-	3	1411	92
TCONS_00095600	XLOC_061053	XLOC_061053	novel	Novel_lncRNA	Chr 16	34793526	34818086	-	3	3155	126
TCONS_00095697	XLOC_061127	XLOC_061127	novel	Novel_lncRNA	Chr 16	37454513	37511396	-	3	573	72
TCONS_00095873	102187615	LOC102187615	protein_coding	Novel_lncRNA	Chr 16	41602133	41632481	-	5	924	261
TCONS_00095903	102177265	RBP7	protein_coding	Novel_lncRNA	Chr 16	42034210	42057366	-	2	386	86
TCONS_00095910	102172286	NMNAT1	protein_coding	Novel_lncRNA	Chr 16	42098756	42109085	-	8	2369	195
TCONS_00095919	XLOC_061259	XLOC_061259	novel	Novel_lncRNA	Chr 16	42186893	42190537	-	2	308	61
TCONS_00095949	XLOC_061271	XLOC_061271	novel	Novel_lncRNA	Chr 16	42542834	42544151	-	2	416	137
TCONS_00095980	102178379	LOC102178379	protein_coding	Novel_lncRNA	Chr 16	42820609	42921050	-	3	9437	290
TCONS_00096022	102177358	ERRFI1	protein_coding	Novel_lncRNA	Chr 16	43893445	43896850	-	2	855	75
TCONS_00096135	XLOC_061387	XLOC_061387	novel	Novel_lncRNA	Chr 16	48095727	48103875	-	11	3393	418
TCONS_00096142	XLOC_061392	XLOC_061392	novel	Novel_lncRNA	Chr 16	48484151	48487284	-	3	253	83
TCONS_00096422	XLOC_061563	XLOC_061563	novel	Novel_lncRNA	Chr 16	51633858	51822441	-	2	963	63
TCONS_00096499	XLOC_061640	XLOC_061640	novel	Novel_lncRNA	Chr 16	51930470	51942149	-	2	733	108
TCONS_00096517	XLOC_061658	XLOC_061658	novel	Novel_lncRNA	Chr 16	52024924	52033011	-	2	290	78
TCONS_00096601	102174958	C16H1orf158	protein_coding	Novel_lncRNA	Chr 16	53208159	53239935	-	3	1205	174
TCONS_00096645	102179584	RC3H1	protein_coding	Novel_lncRNA	Chr 16	53865289	53885227	-	2	7598	139
TCONS_00096734	102186140	ABL2	protein_coding	Novel_lncRNA	Chr 16	59151317	59157603	-	2	4409	178
TCONS_00096753	102187515	LOC102187515	protein_coding	Novel_lncRNA	Chr 16	59672982	59716080	-	11	3750	676
TCONS_00096754	102187515	LOC102187515	protein_coding	Novel_lncRNA	Chr 16	59672982	59716080	-	11	3750	676
TCONS_00096755	102187515	LOC102187515	protein_coding	Novel_lncRNA	Chr 16	59672982	59716080	-	10	3705	661
TCONS_00096772	102184272	KIAA1614	protein_coding	Novel_lncRNA	Chr 16	60658941	60661596	-	2	542	77
TCONS_00096791	XLOC_061848	XLOC_061848	novel	Novel_lncRNA	Chr 16	60833623	60834084	-	2	353	91
TCONS_00096908	XLOC_061915	XLOC_061915	novel	Novel_lncRNA	Chr 16	63803220	63817343	-	2	2027	160
TCONS_00096995	XLOC_061970	XLOC_061970	novel	Novel_lncRNA	Chr 16	68309406	68314630	-	2	248	82
TCONS_00097087	XLOC_062033	XLOC_062033	novel	Novel_lncRNA	Chr 16	69984422	69987105	-	2	247	46
TCONS_00097121	XLOC_062057	XLOC_062057	novel	Novel_lncRNA	Chr 16	71265950	71266946	-	3	597	114
TCONS_00097180	XLOC_062098	XLOC_062098	novel	Novel_lncRNA	Chr 16	74159402	74164322	-	4	592	121
TCONS_00097198	XLOC_062104	XLOC_062104	novel	Novel_lncRNA	Chr 16	74459926	74473040	-	3	217	72
TCONS_00097404	102177157	NAV1	protein_coding	Novel_lncRNA	Chr 16	79029965	79031064	-	3	453	104
TCONS_00097417	108637802	LOC108637802	protein_coding	Novel_lncRNA	Chr 16	79167745	79231711	-	4	1463	353
TCONS_00097419	108637802	LOC108637802	protein_coding	Novel_lncRNA	Chr 16	79171966	79208690	-	3	1110	327
TCONS_00097422	XLOC_062260	XLOC_062260	novel	Novel_lncRNA	Chr 16	79227979	79231711	-	2	1795	167
TCONS_00097476	102175508	LOC102175508	protein_coding	Novel_lncRNA	Chr 17	187879	417334	+	4	858	248
TCONS_00097477	102175508	LOC102175508	protein_coding	Novel_lncRNA	Chr 17	187879	616669	+	5	858	248
TCONS_00097591	106503041	OSBP2	protein_coding	Novel_lncRNA	Chr 17	1565059	1569094	+	2	258	86
TCONS_00097733	102184180	CHEK2	protein_coding	Novel_lncRNA	Chr 17	3074519	3085484	+	7	1719	252
TCONS_00097879	XLOC_062543	XLOC_062543	novel	Novel_lncRNA	Chr 17	7133564	7143717	+	2	9632	153
TCONS_00097911	102181416	FAM222A	protein_coding	Novel_lncRNA	Chr 17	7603504	7636407	+	3	1186	312
TCONS_00097921	102180871	GIT2	protein_coding	Novel_lncRNA	Chr 17	7785789	7786717	+	2	434	144
TCONS_00097933	102174501	SPPL3	protein_coding	Novel_lncRNA	Chr 17	8001011	8003254	+	2	724	194
TCONS_00097937	XLOC_062572	XLOC_062572	novel	Novel_lncRNA	Chr 17	8106671	8116988	+	2	2647	91
TCONS_00097949	102173679	POP5	protein_coding	Novel_lncRNA	Chr 17	8273596	8275950	+	4	772	99
TCONS_00097969	102171640	SIRT4	protein_coding	Novel_lncRNA	Chr 17	8500825	8502765	+	2	1183	110
TCONS_00097985	102169693	MAPKAPK5	protein_coding	Novel_lncRNA	Chr 17	8828754	8831572	+	2	2465	257
TCONS_00098040	102190983	LOC102190983	protein_coding	Novel_lncRNA	Chr 17	9703132	9734574	+	2	2735	159
TCONS_00098053	102190983	LOC102190983	protein_coding	Novel_lncRNA	Chr 17	9749467	9770357	+	2	2934	142
TCONS_00098106	XLOC_062667	XLOC_062667	novel	Novel_lncRNA	Chr 17	12829028	12830037	+	2	707	148
TCONS_00098118	102184081	TESC	protein_coding	Novel_lncRNA	Chr 17	13185960	13194488	+	2	7710	186
TCONS_00098150	XLOC_062694	XLOC_062694	novel	Novel_lncRNA	Chr 17	15075256	15079583	+	2	4024	161
TCONS_00098193	XLOC_062728	XLOC_062728	novel	Novel_lncRNA	Chr 17	15847531	15855517	+	3	1644	101
TCONS_00098197	102182159	LOC102182159	protein_coding	Novel_lncRNA	Chr 17	15847531	15889164	+	5	696	101
TCONS_00098295	102180525	KDM2B	protein_coding	Novel_lncRNA	Chr 17	17475622	17488347	+	3	1786	166
TCONS_00098404	102185112	C17H12orf65	protein_coding	Novel_lncRNA	Chr 17	18882146	18887242	+	3	619	126
TCONS_00098405	102185112	C17H12orf65	protein_coding	Novel_lncRNA	Chr 17	18882146	18891766	+	3	1625	150
TCONS_00098446	102180524	GTF2H3	protein_coding	Novel_lncRNA	Chr 17	19166079	19171325	+	3	251	66
TCONS_00098673	102174325	ANKLE2	protein_coding	Novel_lncRNA	Chr 17	26727615	26732200	+	2	620	105
TCONS_00098693	XLOC_062988	XLOC_062988	novel	Novel_lncRNA	Chr 17	27107246	27109321	+	2	288	75
TCONS_00098697	102173491	ZNF605	protein_coding	Novel_lncRNA	Chr 17	27154052	27160827	+	4	654	167
TCONS_00098702	102173491	ZNF605	protein_coding	Novel_lncRNA	Chr 17	27154052	27265317	+	6	1245	187
TCONS_00098724	102168847	CTSO	protein_coding	Novel_lncRNA	Chr 17	27775361	27776782	+	2	425	87
TCONS_00098762	102191450	C17H4orf46	protein_coding	Novel_lncRNA	Chr 17	30737821	30740086	+	2	777	99
TCONS_00098847	102186892	FGF2	protein_coding	Novel_lncRNA	Chr 17	36276709	36284302	+	3	3121	164
TCONS_00098915	102177082	ANKRD50	protein_coding	Novel_lncRNA	Chr 17	37966687	37993019	+	2	323	107
TCONS_00098953	102175232	ABHD18	protein_coding	Novel_lncRNA	Chr 17	41028350	41032350	+	2	3773	126
TCONS_00099045	XLOC_063218	XLOC_063218	novel	Novel_lncRNA	Chr 17	46013343	46036659	+	3	262	51
TCONS_00099072	XLOC_063244	XLOC_063244	novel	Novel_lncRNA	Chr 17	51235901	51264702	+	2	218	55
TCONS_00099178	102180694	INPP4B	protein_coding	Novel_lncRNA	Chr 17	55172080	55189142	+	2	429	118
TCONS_00099213	102179970	GAB1	protein_coding	Novel_lncRNA	Chr 17	56508396	56575153	+	2	1297	123
TCONS_00099284	102173323	ARHGAP10	protein_coding	Novel_lncRNA	Chr 17	60864889	60877816	+	2	10177	188
TCONS_00099338	XLOC_063432	XLOC_063432	novel	Novel_lncRNA	Chr 17	65192962	65193438	+	2	343	99
TCONS_00099690	102191452	C17H5orf52	protein_coding	Novel_lncRNA	Chr 17	1686568	1693879	-	2	4530	251
TCONS_00099693	XLOC_063627	XLOC_063627	novel	Novel_lncRNA	Chr 17	1694018	1701782	-	3	2416	101
TCONS_00099694	XLOC_063627	XLOC_063627	novel	Novel_lncRNA	Chr 17	1694018	1701805	-	3	5311	176
TCONS_00099763	102187423	MTMR3	protein_coding	Novel_lncRNA	Chr 17	2217499	2288502	-	3	1324	138
TCONS_00099764	102187423	MTMR3	protein_coding	Novel_lncRNA	Chr 17	2233453	2288502	-	3	6315	154
TCONS_00099765	XLOC_063665	XLOC_063665	novel	Novel_lncRNA	Chr 17	2303619	2304771	-	2	838	105
TCONS_00099788	102185295	AP1B1	protein_coding	Novel_lncRNA	Chr 17	2606654	2608159	-	2	263	87
TCONS_00099967	106503050	SSH1	protein_coding	Novel_lncRNA	Chr 17	6949138	6953035	-	2	742	169
TCONS_00099979	102178200	ACACB	protein_coding	Novel_lncRNA	Chr 17	7133155	7189579	-	3	1300	242
TCONS_00100064	102171640	SIRT4	protein_coding	Novel_lncRNA	Chr 17	8498531	8501308	-	2	233	77
TCONS_00100065	102171640	SIRT4	protein_coding	Novel_lncRNA	Chr 17	8500845	8501846	-	2	244	50
TCONS_00100094	102169693	MAPKAPK5	protein_coding	Novel_lncRNA	Chr 17	8828795	8829909	-	2	761	244
TCONS_00100134	102190983	LOC102190983	protein_coding	Novel_lncRNA	Chr 17	9748974	9770508	-	2	3578	142
TCONS_00100219	102185765	RNFT2	protein_coding	Novel_lncRNA	Chr 17	12967174	12969639	-	2	270	90
TCONS_00100310	XLOC_063998	XLOC_063998	novel	Novel_lncRNA	Chr 17	15847531	15857043	-	5	1384	101
TCONS_00100311	XLOC_063998	XLOC_063998	novel	Novel_lncRNA	Chr 17	15847531	15857111	-	6	1556	101
TCONS_00100345	102181327	CUX2	protein_coding	Novel_lncRNA	Chr 17	16296864	16444273	-	3	413	137
TCONS_00100351	XLOC_064015	XLOC_064015	novel	Novel_lncRNA	Chr 17	16432557	16444286	-	3	678	138
TCONS_00100374	102180788	PPTC7	protein_coding	Novel_lncRNA	Chr 17	16783593	16811518	-	2	2433	270
TCONS_00100430	102172288	RNF34	protein_coding	Novel_lncRNA	Chr 17	17437919	17450153	-	2	1207	161
TCONS_00100467	102170348	RHOF	protein_coding	Novel_lncRNA	Chr 17	17712994	17729342	-	4	6858	166
TCONS_00100477	102169119	WDR66	protein_coding	Novel_lncRNA	Chr 17	17829646	17834878	-	2	499	99
TCONS_00100482	102179406	MLXIP	protein_coding	Novel_lncRNA	Chr 17	17943315	17968348	-	2	1393	216
TCONS_00100694	XLOC_064183	XLOC_064183	novel	Novel_lncRNA	Chr 17	22311782	22312600	-	2	582	129
TCONS_00100705	102174961	FZD10	protein_coding	Novel_lncRNA	Chr 17	24248459	24257302	-	2	745	248
TCONS_00100761	XLOC_064233	XLOC_064233	novel	Novel_lncRNA	Chr 17	26372326	26373334	-	2	224	74
TCONS_00100808	XLOC_064256	XLOC_064256	novel	Novel_lncRNA	Chr 17	27106174	27111148	-	3	1581	148
TCONS_00100825	XLOC_064267	XLOC_064267	novel	Novel_lncRNA	Chr 17	28313794	28326791	-	2	210	44
TCONS_00100851	102191450	C17H4orf46	protein_coding	Novel_lncRNA	Chr 17	30736216	30740096	-	2	2392	99
TCONS_00100860	102190628	C17H4orf45	protein_coding	Novel_lncRNA	Chr 17	30836193	30961673	-	18	7058	1126
TCONS_00100861	102190628	C17H4orf45	protein_coding	Novel_lncRNA	Chr 17	30871881	30961673	-	19	7822	1118
TCONS_00100862	102190628	C17H4orf45	protein_coding	Novel_lncRNA	Chr 17	30871881	30962111	-	19	8315	1118
TCONS_00100900	102186892	FGF2	protein_coding	Novel_lncRNA	Chr 17	36261993	36268425	-	2	749	94
TCONS_00100959	102176065	HSPA4L	protein_coding	Novel_lncRNA	Chr 17	40949714	40966695	-	2	1078	95
TCONS_00101000	102172375	SCLT1	protein_coding	Novel_lncRNA	Chr 17	42036260	42053793	-	2	942	187
TCONS_00101001	102172375	SCLT1	protein_coding	Novel_lncRNA	Chr 17	42042186	42087039	-	2	283	94
TCONS_00101026	XLOC_064421	XLOC_064421	novel	Novel_lncRNA	Chr 17	45714384	45719649	-	3	251	41
TCONS_00101058	XLOC_064451	XLOC_064451	novel	Novel_lncRNA	Chr 17	51201495	51202196	-	2	537	72
TCONS_00101133	XLOC_064495	XLOC_064495	novel	Novel_lncRNA	Chr 17	52877644	52883183	-	2	3090	152
TCONS_00101188	XLOC_064541	XLOC_064541	novel	Novel_lncRNA	Chr 17	56037670	56040770	-	2	665	96
TCONS_00101233	108637865	LOC108637865	protein_coding	Novel_lncRNA	Chr 17	57398626	57510609	-	15	4076	719
TCONS_00101368	102188433	FBXW7	protein_coding	Novel_lncRNA	Chr 17	65688256	65723984	-	2	1320	256
TCONS_00101396	XLOC_064675	XLOC_064675	novel	Novel_lncRNA	Chr 17	66630842	66634992	-	2	1244	206
TCONS_00101397	XLOC_064675	XLOC_064675	novel	Novel_lncRNA	Chr 17	66630842	66646036	-	3	1740	206
TCONS_00101398	XLOC_064675	XLOC_064675	novel	Novel_lncRNA	Chr 17	66635188	66637354	-	2	674	121
TCONS_00101472	102169437	ALDH5A1	protein_coding	Novel_lncRNA	Chr 18	86202	98426	+	3	2604	166
TCONS_00101476	102169437	ALDH5A1	protein_coding	Novel_lncRNA	Chr 18	86204	98426	+	4	1763	166
TCONS_00101489	102169718	GPLD1	protein_coding	Novel_lncRNA	Chr 18	175327	210677	+	11	4599	457
TCONS_00101585	102173219	ZFP1	protein_coding	Novel_lncRNA	Chr 18	3712800	3715356	+	2	1086	121
TCONS_00101586	102173219	ZFP1	protein_coding	Novel_lncRNA	Chr 18	3712800	3715356	+	2	1080	119
TCONS_00101602	XLOC_064813	XLOC_064813	novel	Novel_lncRNA	Chr 18	3984509	3985168	+	2	588	78
TCONS_00101641	XLOC_064843	XLOC_064843	novel	Novel_lncRNA	Chr 18	5449878	5450734	+	2	224	37
TCONS_00101680	XLOC_064869	XLOC_064869	novel	Novel_lncRNA	Chr 18	7938083	7940672	+	2	302	100
TCONS_00101687	102179694	CMC2	protein_coding	Novel_lncRNA	Chr 18	9018914	9033399	+	2	557	102
TCONS_00101690	102179694	CMC2	protein_coding	Novel_lncRNA	Chr 18	9018916	9021648	+	2	544	78
TCONS_00101722	XLOC_064901	XLOC_064901	novel	Novel_lncRNA	Chr 18	10449708	10451097	+	2	1154	117
TCONS_00101745	102181147	OSGIN1	protein_coding	Novel_lncRNA	Chr 18	11676080	11679023	+	2	1276	221
TCONS_00101777	102182528	TLDC1	protein_coding	Novel_lncRNA	Chr 18	12101648	12104530	+	2	315	105
TCONS_00101846	XLOC_064992	XLOC_064992	novel	Novel_lncRNA	Chr 18	13215978	13237397	+	3	227	61
TCONS_00101848	XLOC_064992	XLOC_064992	novel	Novel_lncRNA	Chr 18	13232216	13242873	+	4	325	107
TCONS_00101886	XLOC_065021	XLOC_065021	novel	Novel_lncRNA	Chr 18	14486934	14489053	+	2	234	77
TCONS_00101938	102189424	CTU2	protein_coding	Novel_lncRNA	Chr 18	15321456	15324862	+	2	2047	180
TCONS_00102027	102180617	SPIRE2	protein_coding	Novel_lncRNA	Chr 18	16044025	16049344	+	3	4699	217
TCONS_00102192	102183353	FTO	protein_coding	Novel_lncRNA	Chr 18	23418852	23429461	+	2	428	49
TCONS_00102193	102183353	FTO	protein_coding	Novel_lncRNA	Chr 18	23418852	23429461	+	2	451	49
TCONS_00102215	XLOC_065212	XLOC_065212	novel	Novel_lncRNA	Chr 18	25041902	25065442	+	2	1294	95
TCONS_00102376	102168287	MMP15	protein_coding	Novel_lncRNA	Chr 18	27283223	27284935	+	2	944	235
TCONS_00102441	102173221	BEAN1	protein_coding	Novel_lncRNA	Chr 18	35470412	35475529	+	3	568	151
TCONS_00102562	102178759	FAM65A	protein_coding	Novel_lncRNA	Chr 18	36350511	36352630	+	2	465	83
TCONS_00102589	102186041	ENKD1	protein_coding	Novel_lncRNA	Chr 18	36477491	36480314	+	2	877	225
TCONS_00102593	102186987	GFOD2	protein_coding	Novel_lncRNA	Chr 18	36526180	36528063	+	2	1762	162
TCONS_00102617	102180958	NFATC3	protein_coding	Novel_lncRNA	Chr 18	36782429	36810607	+	2	23437	164
TCONS_00102785	102176635	TXNL4B	protein_coding	Novel_lncRNA	Chr 18	40235099	40237592	+	2	326	76
TCONS_00102800	102185392	PKD1L3	protein_coding	Novel_lncRNA	Chr 18	40372649	40410169	+	10	3849	409
TCONS_00102801	102185392	PKD1L3	protein_coding	Novel_lncRNA	Chr 18	40372694	40410169	+	10	3762	395
TCONS_00102944	XLOC_065630	XLOC_065630	novel	Novel_lncRNA	Chr 18	45338629	45340104	+	2	225	74
TCONS_00102946	102191167	LSM14A	protein_coding	Novel_lncRNA	Chr 18	45615703	45667293	+	2	1289	131
TCONS_00103245	102172474	LOC102172474	protein_coding	Novel_lncRNA	Chr 18	48426082	48443308	+	2	208	58
TCONS_00103259	102177831	SIPA1L3	protein_coding	Novel_lncRNA	Chr 18	48669703	48672997	+	2	3196	258
TCONS_00103309	102178937	RASGRP4	protein_coding	Novel_lncRNA	Chr 18	49117635	49119260	+	2	237	78
TCONS_00103352	XLOC_065855	XLOC_065855	novel	Novel_lncRNA	Chr 18	49570927	49571289	+	2	227	62
TCONS_00103448	102187796	BLVRB	protein_coding	Novel_lncRNA	Chr 18	50677051	50694795	+	2	444	144
TCONS_00103674	108637990	LOC108637990	protein_coding	Novel_lncRNA	Chr 18	52357842	52427099	+	2	317	50
TCONS_00103717	108637994	SRRM5	protein_coding	Novel_lncRNA	Chr 18	52905478	52913885	+	3	854	224
TCONS_00103737	102189789	LOC102189789	protein_coding	Novel_lncRNA	Chr 18	53155386	53157501	+	2	1173	197
TCONS_00103771	102185861	PVR	protein_coding	Novel_lncRNA	Chr 18	53485524	53501077	+	3	13977	174
TCONS_00103772	102185861	PVR	protein_coding	Novel_lncRNA	Chr 18	53485524	53501077	+	4	12099	174
TCONS_00103825	106503142	BLOC1S3	protein_coding	Novel_lncRNA	Chr 18	53876814	53886370	+	6	684	156
TCONS_00103831	XLOC_066099	XLOC_066099	novel	Novel_lncRNA	Chr 18	53904561	53907724	+	3	237	78
TCONS_00103896	102191367	MYPOP	protein_coding	Novel_lncRNA	Chr 18	54465015	54469932	+	3	727	197
TCONS_00103904	102168290	CCDC61	protein_coding	Novel_lncRNA	Chr 18	54562181	54566292	+	3	670	222
TCONS_00103937	102176550	SLC1A5	protein_coding	Novel_lncRNA	Chr 18	54912659	54916844	+	2	1420	211
TCONS_00103938	102176550	SLC1A5	protein_coding	Novel_lncRNA	Chr 18	54914115	54916844	+	2	2098	244
TCONS_00104008	102172752	GLTSCR1	protein_coding	Novel_lncRNA	Chr 18	55579297	55630965	+	2	727	129
TCONS_00104269	102188526	NAPSA	protein_coding	Novel_lncRNA	Chr 18	57519870	57524380	+	2	1123	148
TCONS_00104281	102175510	SPIB	protein_coding	Novel_lncRNA	Chr 18	57591592	57594003	+	2	760	109
TCONS_00104286	XLOC_066328	XLOC_066328	novel	Novel_lncRNA	Chr 18	57636644	57638613	+	2	1890	180
TCONS_00104287	XLOC_066328	XLOC_066328	novel	Novel_lncRNA	Chr 18	57637152	57638613	+	2	1320	180
TCONS_00104323	102183867	CLDND2	protein_coding	Novel_lncRNA	Chr 18	58466018	58466841	+	2	279	93
TCONS_00104326	XLOC_066363	XLOC_066363	novel	Novel_lncRNA	Chr 18	58471178	58472056	+	2	263	87
TCONS_00104415	102179466	LOC102179466	protein_coding	Novel_lncRNA	Chr 18	59446439	59647069	+	2	895	132
TCONS_00104416	106503894	LOC106503894	protein_coding	Novel_lncRNA	Chr 18	59449035	59544465	+	2	2685	152
TCONS_00104431	102179466	LOC102179466	protein_coding	Novel_lncRNA	Chr 18	59530295	59638964	+	2	1367	104
TCONS_00104440	102179466	LOC102179466	protein_coding	Novel_lncRNA	Chr 18	59572522	59673176	+	2	222	52
TCONS_00104441	102179466	LOC102179466	protein_coding	Novel_lncRNA	Chr 18	59617786	59786158	+	4	830	102
TCONS_00104482	XLOC_066463	XLOC_066463	novel	Novel_lncRNA	Chr 18	60754732	60757262	+	2	1536	188
TCONS_00104502	102172054	LOC102172054	protein_coding	Novel_lncRNA	Chr 18	61411951	61415926	+	2	3473	565
TCONS_00104542	XLOC_066516	XLOC_066516	novel	Novel_lncRNA	Chr 18	62531936	62532462	+	2	289	96
TCONS_00104730	102174023	LOC102174023	protein_coding	Novel_lncRNA	Chr 18	64204096	64211797	+	2	587	122
TCONS_00104731	102174023	LOC102174023	protein_coding	Novel_lncRNA	Chr 18	64204144	64211516	+	2	257	68
TCONS_00104774	106501822	LOC106501822	protein_coding	Novel_lncRNA	Chr 18	64777698	64780996	+	5	1094	126
TCONS_00104776	106501822	LOC106501822	protein_coding	Novel_lncRNA	Chr 18	64780089	64786796	+	5	890	296
TCONS_00104833	108638125	ZNF71	protein_coding	Novel_lncRNA	Chr 18	65296322	65311962	+	2	2655	307
TCONS_00104843	XLOC_066672	XLOC_066672	novel	Novel_lncRNA	Chr 18	65391511	65392061	+	2	464	154
TCONS_00104860	102172930	AURKC	protein_coding	Novel_lncRNA	Chr 18	65891457	65945302	+	2	817	61
TCONS_00104891	102174870	LOC102174870	protein_coding	Novel_lncRNA	Chr 18	66053175	66069674	+	2	466	154
TCONS_00105022	102173964	LOC102173964	protein_coding	Novel_lncRNA	Chr 18	67201158	67214577	+	7	4138	287
TCONS_00105023	102173964	LOC102173964	protein_coding	Novel_lncRNA	Chr 18	67201158	67214577	+	7	3880	287
TCONS_00105028	102173411	MZF1	protein_coding	Novel_lncRNA	Chr 18	67210620	67214577	+	2	3600	226
TCONS_00105115	106503088	VSTM2B	protein_coding	Novel_lncRNA	Chr 18	2587003	2592605	-	2	244	81
TCONS_00105228	102176721	LOC102176721	protein_coding	Novel_lncRNA	Chr 18	4065447	4074557	-	3	530	129
TCONS_00105282	XLOC_066948	XLOC_066948	novel	Novel_lncRNA	Chr 18	6025181	6035539	-	2	239	64
TCONS_00105287	102178561	NUDT7	protein_coding	Novel_lncRNA	Chr 18	6170795	6180435	-	2	342	113
TCONS_00105339	102179694	CMC2	protein_coding	Novel_lncRNA	Chr 18	9018881	9033343	-	3	647	85
TCONS_00105341	102179974	CENPN	protein_coding	Novel_lncRNA	Chr 18	9035609	9045757	-	2	206	63
TCONS_00105350	102180872	GCSH	protein_coding	Novel_lncRNA	Chr 18	9106181	9110327	-	2	739	153
TCONS_00105396	102183446	MLYCD	protein_coding	Novel_lncRNA	Chr 18	11629404	11640517	-	4	5193	189
TCONS_00105397	102183446	MLYCD	protein_coding	Novel_lncRNA	Chr 18	11635463	11643406	-	2	659	219
TCONS_00105399	102181147	OSGIN1	protein_coding	Novel_lncRNA	Chr 18	11676080	11678201	-	2	454	113
TCONS_00105411	102181707	TAF1C	protein_coding	Novel_lncRNA	Chr 18	11874008	11877938	-	2	911	101
TCONS_00105422	102182528	TLDC1	protein_coding	Novel_lncRNA	Chr 18	12101504	12101817	-	2	220	73
TCONS_00105434	XLOC_067060	XLOC_067060	novel	Novel_lncRNA	Chr 18	12228488	12229465	-	2	804	123
TCONS_00105514	XLOC_067125	XLOC_067125	novel	Novel_lncRNA	Chr 18	13980293	14049968	-	2	453	119
TCONS_00105667	102191072	CBFA2T3	protein_coding	Novel_lncRNA	Chr 18	15493075	15504412	-	4	10893	418
TCONS_00105812	102177272	N4BP1	protein_coding	Novel_lncRNA	Chr 18	20284235	20292098	-	2	476	158
TCONS_00105847	108637964	LOC108637964	protein_coding	Novel_lncRNA	Chr 18	21822968	21911321	-	12	2900	473
TCONS_00105857	108637964	LOC108637964	protein_coding	Novel_lncRNA	Chr 18	21875419	21912322	-	10	3354	456
TCONS_00105876	102180418	CHD9	protein_coding	Novel_lncRNA	Chr 18	22930143	22930790	-	2	565	187
TCONS_00105925	102188618	LOC102188618	protein_coding	Novel_lncRNA	Chr 18	25393218	25395225	-	2	521	155
TCONS_00106012	102171643	DRC7	protein_coding	Novel_lncRNA	Chr 18	27046367	27047719	-	2	500	110
TCONS_00106025	XLOC_067447	XLOC_067447	novel	Novel_lncRNA	Chr 18	27115272	27122927	-	2	219	72
TCONS_00106137	102174868	CDH16	protein_coding	Novel_lncRNA	Chr 18	35885740	35893279	-	3	6505	203
TCONS_00106186	102181067	LRRC29	protein_coding	Novel_lncRNA	Chr 18	36108847	36128785	-	7	4512	213
TCONS_00106284	102180958	NFATC3	protein_coding	Novel_lncRNA	Chr 18	36782424	36787885	-	2	720	137
TCONS_00106312	102181807	CDH3	protein_coding	Novel_lncRNA	Chr 18	37270079	37272554	-	2	208	69
TCONS_00106319	102170999	HAS3	protein_coding	Novel_lncRNA	Chr 18	37572833	37574630	-	2	339	77
TCONS_00106397	102176635	TXNL4B	protein_coding	Novel_lncRNA	Chr 18	40235178	40237673	-	2	249	76
TCONS_00106550	XLOC_067777	XLOC_067777	novel	Novel_lncRNA	Chr 18	45331971	45337675	-	2	420	63
TCONS_00106553	XLOC_067780	XLOC_067780	novel	Novel_lncRNA	Chr 18	45338298	45338699	-	2	301	86
TCONS_00106655	102185210	CD22	protein_coding	Novel_lncRNA	Chr 18	46874489	46875068	-	2	462	129
TCONS_00106659	102183173	DMKN	protein_coding	Novel_lncRNA	Chr 18	46988540	46993567	-	6	949	116
TCONS_00106722	102173494	ALKBH6	protein_coding	Novel_lncRNA	Chr 18	47526270	47529209	-	3	1700	108
TCONS_00106723	102173494	ALKBH6	protein_coding	Novel_lncRNA	Chr 18	47526270	47529209	-	3	1960	135
TCONS_00106724	102173220	CLIP3	protein_coding	Novel_lncRNA	Chr 18	47529406	47531681	-	2	318	53
TCONS_00106731	102174774	THAP8	protein_coding	Novel_lncRNA	Chr 18	47549857	47558217	-	2	390	95
TCONS_00106786	102171183	LOC102171183	protein_coding	Novel_lncRNA	Chr 18	48005792	48011923	-	2	2649	193
TCONS_00106807	XLOC_067929	XLOC_067929	novel	Novel_lncRNA	Chr 18	48164049	48186005	-	6	1131	263
TCONS_00106821	102173031	ZNF569	protein_coding	Novel_lncRNA	Chr 18	48306335	48311886	-	3	1368	137
TCONS_00107051	102188074	SPTBN4	protein_coding	Novel_lncRNA	Chr 18	50720419	50724412	-	2	216	72
TCONS_00107060	102188890	NUMBL	protein_coding	Novel_lncRNA	Chr 18	50860780	50866502	-	3	500	130
TCONS_00107139	XLOC_068107	XLOC_068107	novel	Novel_lncRNA	Chr 18	51652081	51654231	-	2	205	58
TCONS_00107180	102173878	DEDD2	protein_coding	Novel_lncRNA	Chr 18	51942732	51944529	-	2	1235	204
TCONS_00107220	106501782	LOC106501782	protein_coding	Novel_lncRNA	Chr 18	52321959	52350603	-	5	480	136
TCONS_00107278	108637997	IRGC	protein_coding	Novel_lncRNA	Chr 18	52990408	53000163	-	2	248	75
TCONS_00107299	102191365	ZNF404	protein_coding	Novel_lncRNA	Chr 18	53147370	53150292	-	3	1750	82
TCONS_00107332	102185861	PVR	protein_coding	Novel_lncRNA	Chr 18	53474683	53480182	-	2	5002	144
TCONS_00107333	102185861	PVR	protein_coding	Novel_lncRNA	Chr 18	53474683	53480219	-	3	1711	128
TCONS_00107338	102188494	CEACAM16	protein_coding	Novel_lncRNA	Chr 18	53542916	53544459	-	2	301	100
TCONS_00107390	XLOC_068258	XLOC_068258	novel	Novel_lncRNA	Chr 18	53973510	53975346	-	2	887	149
TCONS_00107505	XLOC_068322	XLOC_068322	novel	Novel_lncRNA	Chr 18	54791220	54793103	-	2	822	129
TCONS_00107523	102176256	STRN4	protein_coding	Novel_lncRNA	Chr 18	54891111	54903292	-	3	6165	509
TCONS_00107555	XLOC_068350	XLOC_068350	novel	Novel_lncRNA	Chr 18	55296594	55297832	-	2	702	90
TCONS_00107747	102169895	FLT3LG	protein_coding	Novel_lncRNA	Chr 18	56944495	56950080	-	2	403	92
TCONS_00107811	102186625	TBC1D17	protein_coding	Novel_lncRNA	Chr 18	57241679	57244079	-	3	586	125
TCONS_00107823	102187158	NUP62	protein_coding	Novel_lncRNA	Chr 18	57276940	57282004	-	3	2292	313
TCONS_00107851	102175510	SPIB	protein_coding	Novel_lncRNA	Chr 18	57587180	57594721	-	3	5540	401
TCONS_00107852	102175510	SPIB	protein_coding	Novel_lncRNA	Chr 18	57587180	57595360	-	2	6851	401
TCONS_00107866	XLOC_068509	XLOC_068509	novel	Novel_lncRNA	Chr 18	57637030	57638951	-	2	1842	293
TCONS_00107967	108633328	LOC108633328	protein_coding	Novel_lncRNA	Chr 18	58584530	58585346	-	2	212	70
TCONS_00107968	108633328	LOC108633328	protein_coding	Novel_lncRNA	Chr 18	58584530	58586411	-	2	525	175
TCONS_00107988	XLOC_068574	XLOC_068574	novel	Novel_lncRNA	Chr 18	58705684	58713632	-	2	2008	301
TCONS_00108087	102191785	LOC102191785	protein_coding	Novel_lncRNA	Chr 18	60133448	60237203	-	2	1044	77
TCONS_00108094	102170775	LOC102170775	protein_coding	Novel_lncRNA	Chr 18	60253834	60444906	-	2	300	74
TCONS_00108175	102175116	LOC102175116	protein_coding	Novel_lncRNA	Chr 18	61266227	61419804	-	2	723	86
TCONS_00108184	102188030	LOC102188030	protein_coding	Novel_lncRNA	Chr 18	61449647	61580801	-	3	1214	161
TCONS_00108198	102188030	LOC102188030	protein_coding	Novel_lncRNA	Chr 18	61578704	61580801	-	2	1972	163
TCONS_00108204	102187258	LOC102187258	protein_coding	Novel_lncRNA	Chr 18	61806778	61818111	-	2	517	164
TCONS_00108211	108638038	LOC108638038	protein_coding	Novel_lncRNA	Chr 18	61901332	61917700	-	4	4100	522
TCONS_00108221	108638038	LOC108638038	protein_coding	Novel_lncRNA	Chr 18	61933174	61935453	-	2	659	70
TCONS_00108230	102174824	LOC102174824	protein_coding	Novel_lncRNA	Chr 18	62142679	62143703	-	2	424	94
TCONS_00108236	106503154	LOC106503154	protein_coding	Novel_lncRNA	Chr 18	62212352	62220749	-	3	5198	118
TCONS_00108237	106503154	LOC106503154	protein_coding	Novel_lncRNA	Chr 18	62212352	62220749	-	3	6369	118
TCONS_00108238	106503154	LOC106503154	protein_coding	Novel_lncRNA	Chr 18	62219073	62220749	-	2	1078	96
TCONS_00108244	102189337	LOC102189337	protein_coding	Novel_lncRNA	Chr 18	62324192	62335692	-	4	5393	175
TCONS_00108257	102180391	LOC102180391	protein_coding	Novel_lncRNA	Chr 18	62532787	62777221	-	3	240	79
TCONS_00108258	XLOC_068750	XLOC_068750	novel	Novel_lncRNA	Chr 18	62533639	62534072	-	2	234	78
TCONS_00108273	102170417	LOC102170417	protein_coding	Novel_lncRNA	Chr 18	62632764	62639287	-	2	211	56
TCONS_00108368	108638051	LOC108638051	protein_coding	Novel_lncRNA	Chr 18	64119234	64121059	-	3	1601	156
TCONS_00108377	102174023	LOC102174023	protein_coding	Novel_lncRNA	Chr 18	64203442	64211354	-	2	797	77
TCONS_00108417	106501822	LOC106501822	protein_coding	Novel_lncRNA	Chr 18	64677121	64780004	-	3	2873	152
TCONS_00108420	102174835	LOC102174835	protein_coding	Novel_lncRNA	Chr 18	64699124	64701904	-	2	408	116
TCONS_00108423	102172431	LOC102172431	protein_coding	Novel_lncRNA	Chr 18	64743328	64754347	-	2	228	75
TCONS_00108425	106501822	LOC106501822	protein_coding	Novel_lncRNA	Chr 18	64756444	64761037	-	2	361	106
TCONS_00108427	106501822	LOC106501822	protein_coding	Novel_lncRNA	Chr 18	64776246	64780004	-	2	3091	212
TCONS_00108510	XLOC_068895	XLOC_068895	novel	Novel_lncRNA	Chr 18	65391585	65391900	-	2	229	76
TCONS_00108547	102174870	LOC102174870	protein_coding	Novel_lncRNA	Chr 18	66059538	66062471	-	3	2681	105
TCONS_00108548	102174870	LOC102174870	protein_coding	Novel_lncRNA	Chr 18	66059538	66063750	-	4	2701	105
TCONS_00108616	102181424	LOC102181424	protein_coding	Novel_lncRNA	Chr 18	66771541	66780337	-	2	296	84
TCONS_00108630	102182436	LOC102182436	protein_coding	Novel_lncRNA	Chr 18	66922137	66929325	-	2	611	203
TCONS_00108649	102183000	LOC102183000	protein_coding	Novel_lncRNA	Chr 18	67003986	67011151	-	2	344	71
TCONS_00108726	XLOC_069019	XLOC_069019	novel	Novel_lncRNA	Chr 19	5222236	5226934	+	2	1373	164
TCONS_00108843	108638252	LOC108638252	protein_coding	Novel_lncRNA	Chr 19	8704527	8705031	+	2	483	74
TCONS_00108869	XLOC_069119	XLOC_069119	novel	Novel_lncRNA	Chr 19	9257533	9279552	+	2	515	100
TCONS_00108978	102174242	USP32	protein_coding	Novel_lncRNA	Chr 19	12207447	12224222	+	2	2007	84
TCONS_00108979	102174242	USP32	protein_coding	Novel_lncRNA	Chr 19	12220947	12233427	+	2	1569	141
TCONS_00109022	102168855	AATF	protein_coding	Novel_lncRNA	Chr 19	13040023	13044126	+	2	517	159
TCONS_00109088	XLOC_069246	XLOC_069246	novel	Novel_lncRNA	Chr 19	13968911	13970765	+	3	473	92
TCONS_00109137	102185773	RAD51D	protein_coding	Novel_lncRNA	Chr 19	14626512	14628824	+	3	1455	156
TCONS_00109142	102186047	RFFL	protein_coding	Novel_lncRNA	Chr 19	14674951	14677261	+	2	709	76
TCONS_00109244	102182438	EVI2B	protein_coding	Novel_lncRNA	Chr 19	18276347	18526600	+	58	11945	2970
TCONS_00109246	102182438	EVI2B	protein_coding	Novel_lncRNA	Chr 19	18319218	18526600	+	37	5904	1967
TCONS_00109295	XLOC_069376	XLOC_069376	novel	Novel_lncRNA	Chr 19	18961998	18964477	+	2	768	125
TCONS_00109404	102171544	ANKRD13B	protein_coding	Novel_lncRNA	Chr 19	20685221	20695135	+	9	4542	383
TCONS_00109407	102171005	CORO6	protein_coding	Novel_lncRNA	Chr 19	20691805	20692639	+	2	540	81
TCONS_00109416	102171738	NSRP1	protein_coding	Novel_lncRNA	Chr 19	21058071	21071636	+	3	10150	167
TCONS_00109417	102171738	NSRP1	protein_coding	Novel_lncRNA	Chr 19	21058071	21081215	+	3	1919	120
TCONS_00109473	102173778	RPH3AL	protein_coding	Novel_lncRNA	Chr 19	22123677	22240377	+	6	1797	166
TCONS_00109579	102179236	TRPV3	protein_coding	Novel_lncRNA	Chr 19	24061076	24062314	+	2	206	68
TCONS_00109773	102186719	PELP1	protein_coding	Novel_lncRNA	Chr 19	26446575	26450899	+	5	401	125
TCONS_00109784	102187263	ALOX12	protein_coding	Novel_lncRNA	Chr 19	26548050	26608903	+	2	341	67
TCONS_00109785	102187263	ALOX12	protein_coding	Novel_lncRNA	Chr 19	26548166	26608662	+	2	373	72
TCONS_00109816	102181334	ASGR1	protein_coding	Novel_lncRNA	Chr 19	26708386	26710644	+	2	301	70
TCONS_00109885	XLOC_069676	XLOC_069676	novel	Novel_lncRNA	Chr 19	26989039	26992278	+	2	3153	147
TCONS_00109903	102191171	MPDU1	protein_coding	Novel_lncRNA	Chr 19	27055173	27056007	+	2	381	61
TCONS_00110002	XLOC_069745	XLOC_069745	novel	Novel_lncRNA	Chr 19	27721397	27723190	+	2	598	143
TCONS_00110068	102180624	MYH8	protein_coding	Novel_lncRNA	Chr 19	29080715	29189413	+	3	400	133
TCONS_00110104	102181988	ADPRM	protein_coding	Novel_lncRNA	Chr 19	29382629	29398251	+	4	9679	206
TCONS_00110116	XLOC_069787	XLOC_069787	novel	Novel_lncRNA	Chr 19	29774589	29775099	+	2	225	74
TCONS_00110155	102185115	CDRT4	protein_coding	Novel_lncRNA	Chr 19	32608931	32613440	+	2	216	72
TCONS_00110354	102171646	MED9	protein_coding	Novel_lncRNA	Chr 19	34470705	34474801	+	2	628	140
TCONS_00110436	XLOC_069953	XLOC_069953	novel	Novel_lncRNA	Chr 19	35037784	35057013	+	3	239	51
TCONS_00110477	XLOC_069970	XLOC_069970	novel	Novel_lncRNA	Chr 19	35518033	35519689	+	2	298	41
TCONS_00110486	102178659	WFIKKN2	protein_coding	Novel_lncRNA	Chr 19	35565545	35590436	+	2	568	111
TCONS_00110512	102176727	CHAD	protein_coding	Novel_lncRNA	Chr 19	35886369	35894093	+	7	1091	238
TCONS_00110534	XLOC_070012	XLOC_070012	novel	Novel_lncRNA	Chr 19	36130039	36130877	+	2	773	110
TCONS_00110535	108633283	LOC108633283	protein_coding	Novel_lncRNA	Chr 19	36131180	36140751	+	9	2370	266
TCONS_00110536	108633283	LOC108633283	protein_coding	Novel_lncRNA	Chr 19	36131180	36140751	+	8	1775	292
TCONS_00110538	108633283	LOC108633283	protein_coding	Novel_lncRNA	Chr 19	36131180	36140751	+	7	1612	305
TCONS_00110757	102173502	ARHGAP23	protein_coding	Novel_lncRNA	Chr 19	38708802	38720077	+	2	2118	256
TCONS_00110856	XLOC_070195	XLOC_070195	novel	Novel_lncRNA	Chr 19	39756281	39760587	+	2	223	74
TCONS_00110876	102186338	THRA	protein_coding	Novel_lncRNA	Chr 19	40012757	40037482	+	2	2876	311
TCONS_00110933	102168294	KRT10	protein_coding	Novel_lncRNA	Chr 19	40652790	40665712	+	2	2124	98
TCONS_00111073	102183725	PLEKHH3	protein_coding	Novel_lncRNA	Chr 19	42381597	42385304	+	2	2474	144
TCONS_00111096	102190728	BECN1	protein_coding	Novel_lncRNA	Chr 19	42492505	42496006	+	2	378	50
TCONS_00111098	XLOC_070343	XLOC_070343	novel	Novel_lncRNA	Chr 19	42494269	42495542	+	2	383	70
TCONS_00111163	XLOC_070366	XLOC_070366	novel	Novel_lncRNA	Chr 19	42876622	42921461	+	3	3818	207
TCONS_00111169	XLOC_070370	XLOC_070370	novel	Novel_lncRNA	Chr 19	42921765	42975718	+	3	475	64
TCONS_00111174	XLOC_070375	XLOC_070375	novel	Novel_lncRNA	Chr 19	42943652	42944558	+	2	327	109
TCONS_00111179	XLOC_070370	XLOC_070370	novel	Novel_lncRNA	Chr 19	42974593	42975718	+	2	821	140
TCONS_00111306	102187261	KIF18B	protein_coding	Novel_lncRNA	Chr 19	44270103	44274878	+	2	248	82
TCONS_00111317	102189156	HEXIM2	protein_coding	Novel_lncRNA	Chr 19	44461698	44463483	+	2	603	200
TCONS_00111334	102168300	ARHGAP27	protein_coding	Novel_lncRNA	Chr 19	44711135	44712147	+	2	398	123
TCONS_00111355	XLOC_070480	XLOC_070480	novel	Novel_lncRNA	Chr 19	45509625	45519048	+	2	209	69
TCONS_00111358	100860820	MAPT	protein_coding	Novel_lncRNA	Chr 19	45520418	45546940	+	2	329	96
TCONS_00111427	102171190	2021-03-10	protein_coding	Novel_lncRNA	Chr 19	46722429	46739927	+	2	4766	173
TCONS_00111436	102171190	2021-03-10	protein_coding	Novel_lncRNA	Chr 19	46819612	46820320	+	2	505	107
TCONS_00111493	XLOC_070560	XLOC_070560	novel	Novel_lncRNA	Chr 19	47395843	47396370	+	2	335	95
TCONS_00111533	108638310	LOC108638310	protein_coding	Novel_lncRNA	Chr 19	47835931	47838688	+	2	1496	188
TCONS_00111697	102187802	CSNK1D	protein_coding	Novel_lncRNA	Chr 19	50014139	50022813	+	6	3167	510
TCONS_00111698	102187802	CSNK1D	protein_coding	Novel_lncRNA	Chr 19	50014139	50026467	+	5	3117	491
TCONS_00111699	102187802	CSNK1D	protein_coding	Novel_lncRNA	Chr 19	50014275	50020104	+	5	3208	510
TCONS_00111700	102187802	CSNK1D	protein_coding	Novel_lncRNA	Chr 19	50014275	50026467	+	6	3117	510
TCONS_00111851	102184374	BAIAP2	protein_coding	Novel_lncRNA	Chr 19	50942422	50947707	+	2	4460	213
TCONS_00112046	XLOC_070852	XLOC_070852	novel	Novel_lncRNA	Chr 19	53970344	53973584	+	2	326	108
TCONS_00112090	102184941	PRCD	protein_coding	Novel_lncRNA	Chr 19	54431126	54432861	+	2	402	77
TCONS_00112331	XLOC_070974	XLOC_070974	novel	Novel_lncRNA	Chr 19	56237410	56240358	+	2	374	124
TCONS_00112366	102176458	CPSF4L	protein_coding	Novel_lncRNA	Chr 19	57261889	57269265	+	4	1248	164
TCONS_00112384	XLOC_071011	XLOC_071011	novel	Novel_lncRNA	Chr 19	57865060	57866358	+	2	959	194
TCONS_00112400	XLOC_071027	XLOC_071027	novel	Novel_lncRNA	Chr 19	58128630	58130035	+	2	252	67
TCONS_00112412	XLOC_071039	XLOC_071039	novel	Novel_lncRNA	Chr 19	59698017	59699295	+	2	1003	91
TCONS_00112490	102178109	LOC102178109	protein_coding	Novel_lncRNA	Chr 19	60708051	60711608	+	3	779	164
TCONS_00112496	XLOC_071095	XLOC_071095	novel	Novel_lncRNA	Chr 19	60774321	60775295	+	2	836	115
TCONS_00112506	102178394	FAM20A	protein_coding	Novel_lncRNA	Chr 19	60874599	60905731	+	4	1708	462
TCONS_00112517	102179237	WIPI1	protein_coding	Novel_lncRNA	Chr 19	60993220	60997456	+	4	785	122
TCONS_00112543	102170818	GNA13	protein_coding	Novel_lncRNA	Chr 19	61172239	61173136	+	2	821	272
TCONS_00112552	108638219	LOC108638219	protein_coding	Novel_lncRNA	Chr 19	61429311	61744978	+	27	3308	955
TCONS_00112554	108638219	LOC108638219	protein_coding	Novel_lncRNA	Chr 19	61429397	61744642	+	27	3530	656
TCONS_00112555	108638219	LOC108638219	protein_coding	Novel_lncRNA	Chr 19	61592546	61744642	+	20	2658	718
TCONS_00112594	102174689	CA10	protein_coding	Novel_lncRNA	Chr 19	1134524	1146940	-	3	1207	110
TCONS_00112595	102174689	CA10	protein_coding	Novel_lncRNA	Chr 19	1144652	1146919	-	2	1371	110
TCONS_00112623	XLOC_071185	XLOC_071185	novel	Novel_lncRNA	Chr 19	5222422	5226299	-	2	552	143
TCONS_00112655	XLOC_071202	XLOC_071202	novel	Novel_lncRNA	Chr 19	6943067	6944417	-	2	230	76
TCONS_00112669	XLOC_071216	XLOC_071216	novel	Novel_lncRNA	Chr 19	7146322	7161046	-	2	455	151
TCONS_00112782	102188893	TEX14	protein_coding	Novel_lncRNA	Chr 19	9133094	9223338	-	4	756	143
TCONS_00112792	102187429	TRIM37	protein_coding	Novel_lncRNA	Chr 19	9575108	9581392	-	2	395	60
TCONS_00112814	102168385	VMP1	protein_coding	Novel_lncRNA	Chr 19	10427973	10434436	-	2	5413	155
TCONS_00112880	102168292	MYO19	protein_coding	Novel_lncRNA	Chr 19	12478252	12487999	-	6	2822	188
TCONS_00112909	102168855	AATF	protein_coding	Novel_lncRNA	Chr 19	13040084	13044095	-	2	425	138
TCONS_00112921	100861224	ACACA	protein_coding	Novel_lncRNA	Chr 19	13326684	13351894	-	2	708	117
TCONS_00113016	108638247	C19H17orf50	protein_coding	Novel_lncRNA	Chr 19	14234201	14259461	-	8	2439	589
TCONS_00113034	102184939	SLFN12	protein_coding	Novel_lncRNA	Chr 19	14486411	14505565	-	2	674	154
TCONS_00113070	102177189	MYO1D	protein_coding	Novel_lncRNA	Chr 19	16982244	17002933	-	2	639	166
TCONS_00113072	102177189	MYO1D	protein_coding	Novel_lncRNA	Chr 19	17103086	17105344	-	2	250	79
TCONS_00113096	102187708	RHBDL3	protein_coding	Novel_lncRNA	Chr 19	17535790	17538296	-	3	535	168
TCONS_00113147	XLOC_071449	XLOC_071449	novel	Novel_lncRNA	Chr 19	18104751	18112664	-	3	7196	129
TCONS_00113196	102184839	LYRM9	protein_coding	Novel_lncRNA	Chr 19	19310120	19325380	-	4	2627	151
TCONS_00113432	102176262	TLCD2	protein_coding	Novel_lncRNA	Chr 19	22600459	22611257	-	3	9774	179
TCONS_00113523	102187259	TAX1BP3	protein_coding	Novel_lncRNA	Chr 19	24166707	24173015	-	4	2076	178
TCONS_00113581	108638213	LOC108638213	protein_coding	Novel_lncRNA	Chr 19	25054124	25067695	-	3	559	115
TCONS_00113798	102186994	CHRNB1	protein_coding	Novel_lncRNA	Chr 19	26941642	26942518	-	2	839	145
TCONS_00113818	102169129	SAT2	protein_coding	Novel_lncRNA	Chr 19	27082720	27084322	-	4	859	150
TCONS_00113825	102170175	DNAH2	protein_coding	Novel_lncRNA	Chr 19	27242682	27245777	-	3	2060	166
TCONS_00113831	102168575	KDM6B	protein_coding	Novel_lncRNA	Chr 19	27265157	27270829	-	2	5139	233
TCONS_00113835	102168575	KDM6B	protein_coding	Novel_lncRNA	Chr 19	27277639	27278584	-	2	704	150
TCONS_00113903	102170816	ARHGEF15	protein_coding	Novel_lncRNA	Chr 19	27655128	27663310	-	3	871	97
TCONS_00113934	102172481	PIK3R6	protein_coding	Novel_lncRNA	Chr 19	28075039	28085837	-	2	945	140
TCONS_00114125	102178568	PIGL	protein_coding	Novel_lncRNA	Chr 19	32953498	32961983	-	5	1319	321
TCONS_00114187	XLOC_072011	XLOC_072011	novel	Novel_lncRNA	Chr 19	33726715	33728270	-	2	687	124
TCONS_00114188	XLOC_072011	XLOC_072011	novel	Novel_lncRNA	Chr 19	33727535	33728238	-	2	237	76
TCONS_00114211	106503264	FAM83G	protein_coding	Novel_lncRNA	Chr 19	33894956	33895907	-	2	496	164
TCONS_00114214	102191172	SLC5A10	protein_coding	Novel_lncRNA	Chr 19	33916965	33923341	-	2	846	282
TCONS_00114253	XLOC_072041	XLOC_072041	novel	Novel_lncRNA	Chr 19	34216457	34217503	-	3	361	82
TCONS_00114255	XLOC_072042	XLOC_072042	novel	Novel_lncRNA	Chr 19	34218043	34280880	-	12	1210	403
TCONS_00114257	100860908	SREBF1	protein_coding	Novel_lncRNA	Chr 19	34218043	34290804	-	14	4937	503
TCONS_00114415	102181156	ABCC3	protein_coding	Novel_lncRNA	Chr 19	35671695	35695522	-	6	6333	451
TCONS_00114502	102187076	TAC4	protein_coding	Novel_lncRNA	Chr 19	36445963	36457368	-	2	11272	143
TCONS_00114759	102182906	GRB7	protein_coding	Novel_lncRNA	Chr 19	39752389	39760845	-	2	682	176
TCONS_00114894	102179515	LOC102179515	protein_coding	Novel_lncRNA	Chr 19	41355610	41356591	-	2	560	110
TCONS_00114928	102180076	JUP	protein_coding	Novel_lncRNA	Chr 19	41629807	41632871	-	2	549	116
TCONS_00114957	102181810	ZNF385C	protein_coding	Novel_lncRNA	Chr 19	41810554	41817214	-	6	4090	187
TCONS_00115071	102168295	LOC102168295	protein_coding	Novel_lncRNA	Chr 19	42516893	42530482	-	2	700	233
TCONS_00115074	102168295	LOC102168295	protein_coding	Novel_lncRNA	Chr 19	42516893	42553530	-	2	508	169
TCONS_00115113	XLOC_072527	XLOC_072527	novel	Novel_lncRNA	Chr 19	42890957	42974289	-	3	3885	207
TCONS_00115118	XLOC_072527	XLOC_072527	novel	Novel_lncRNA	Chr 19	42920528	42943338	-	2	793	110
TCONS_00115121	XLOC_072527	XLOC_072527	novel	Novel_lncRNA	Chr 19	42932870	42943338	-	2	418	95
TCONS_00115122	XLOC_072529	XLOC_072529	novel	Novel_lncRNA	Chr 19	42942566	42954370	-	2	766	132
TCONS_00115209	102180254	HDAC5	protein_coding	Novel_lncRNA	Chr 19	43579637	43588578	-	2	5845	172
TCONS_00115263	XLOC_072596	XLOC_072596	novel	Novel_lncRNA	Chr 19	44008737	44011706	-	2	1977	137
TCONS_00115403	102171190	2021-03-10	protein_coding	Novel_lncRNA	Chr 19	46729598	46731481	-	2	979	172
TCONS_00115416	XLOC_072695	XLOC_072695	novel	Novel_lncRNA	Chr 19	47395804	47396358	-	2	362	91
TCONS_00115477	XLOC_072717	XLOC_072717	novel	Novel_lncRNA	Chr 19	47835167	47835866	-	2	447	118
TCONS_00115481	108638310	LOC108638310	protein_coding	Novel_lncRNA	Chr 19	47835927	47846443	-	2	1193	130
TCONS_00115486	XLOC_072718	XLOC_072718	novel	Novel_lncRNA	Chr 19	47855384	47857195	-	2	378	82
TCONS_00115587	102183361	PITPNC1	protein_coding	Novel_lncRNA	Chr 19	48794070	48803664	-	2	6012	149
TCONS_00115917	102179594	LOC102179594	protein_coding	Novel_lncRNA	Chr 19	53125159	53125929	-	2	630	126
TCONS_00115918	102179594	LOC102179594	protein_coding	Novel_lncRNA	Chr 19	53125159	53127028	-	2	468	147
TCONS_00115998	102183452	METTL23	protein_coding	Novel_lncRNA	Chr 19	54256429	54265175	-	8	2761	250
TCONS_00116114	102172387	UNK	protein_coding	Novel_lncRNA	Chr 19	55030124	55040632	-	2	10477	173
TCONS_00116115	102172387	UNK	protein_coding	Novel_lncRNA	Chr 19	55030124	55040632	-	2	10445	173
TCONS_00116116	102172387	UNK	protein_coding	Novel_lncRNA	Chr 19	55035423	55040632	-	2	4920	173
TCONS_00116266	102175330	TTYH2	protein_coding	Novel_lncRNA	Chr 19	56447890	56454124	-	2	549	182
TCONS_00116333	XLOC_073164	XLOC_073164	novel	Novel_lncRNA	Chr 19	59819942	59837817	-	2	6302	172
TCONS_00116334	XLOC_073164	XLOC_073164	novel	Novel_lncRNA	Chr 19	59819942	59840678	-	3	8283	172
TCONS_00116335	XLOC_073164	XLOC_073164	novel	Novel_lncRNA	Chr 19	59819942	59840829	-	2	9595	172
TCONS_00116343	XLOC_073166	XLOC_073166	novel	Novel_lncRNA	Chr 19	59995850	60001587	-	2	330	54
TCONS_00116357	102169516	MAP2K6	protein_coding	Novel_lncRNA	Chr 19	60413502	60458084	-	2	1361	181
TCONS_00116383	XLOC_073193	XLOC_073193	novel	Novel_lncRNA	Chr 19	60774198	60781032	-	2	852	115
TCONS_00116384	XLOC_073193	XLOC_073193	novel	Novel_lncRNA	Chr 19	60778490	60781046	-	2	659	107
TCONS_00006952	XLOC_004576	XLOC_004576	novel	Novel_lncRNA	Chr 2	572582	578004	+	2	5235	239
TCONS_00007009	XLOC_004617	XLOC_004617	novel	Novel_lncRNA	Chr 2	2186613	2192386	+	2	208	58
TCONS_00007025	XLOC_004627	XLOC_004627	novel	Novel_lncRNA	Chr 2	2674160	2678290	+	5	765	176
TCONS_00007035	XLOC_004636	XLOC_004636	novel	Novel_lncRNA	Chr 2	2925105	2926007	+	2	760	100
TCONS_00007054	XLOC_004651	XLOC_004651	novel	Novel_lncRNA	Chr 2	3243188	3244626	+	2	580	72
TCONS_00007060	102191566	UBXN10	protein_coding	Novel_lncRNA	Chr 2	3480974	3507785	+	5	1917	283
TCONS_00007061	102168220	PLA2G2C	protein_coding	Novel_lncRNA	Chr 2	3481701	3486266	+	2	662	107
TCONS_00007076	106503579	CAMK2N1	protein_coding	Novel_lncRNA	Chr 2	3829093	3832131	+	3	1825	342
TCONS_00007077	106503579	CAMK2N1	protein_coding	Novel_lncRNA	Chr 2	3830200	3832131	+	2	1418	472
TCONS_00007079	XLOC_004670	XLOC_004670	novel	Novel_lncRNA	Chr 2	3852536	3856810	+	2	1425	88
TCONS_00007134	102188638	CDC42	protein_coding	Novel_lncRNA	Chr 2	5173924	5186583	+	2	12359	248
TCONS_00007139	102187819	WNT4	protein_coding	Novel_lncRNA	Chr 2	5247651	5257890	+	2	8486	259
TCONS_00007172	102183193	ZNF436	protein_coding	Novel_lncRNA	Chr 2	6472937	6473988	+	2	568	78
TCONS_00007363	102191283	RPS6KA1	protein_coding	Novel_lncRNA	Chr 2	9362648	9372883	+	3	338	112
TCONS_00007469	102184956	STX12	protein_coding	Novel_lncRNA	Chr 2	10414871	10420351	+	2	4170	111
TCONS_00007531	XLOC_004932	XLOC_004932	novel	Novel_lncRNA	Chr 2	11154111	11168874	+	3	482	96
TCONS_00007542	102177573	YTHDF2	protein_coding	Novel_lncRNA	Chr 2	11217602	11256827	+	4	10200	171
TCONS_00007570	102176373	EPB41	protein_coding	Novel_lncRNA	Chr 2	11535611	11545152	+	3	1954	316
TCONS_00007604	102170745	ZCCHC17	protein_coding	Novel_lncRNA	Chr 2	13648254	13674149	+	8	3846	219
TCONS_00007605	102170745	ZCCHC17	protein_coding	Novel_lncRNA	Chr 2	13648254	13675741	+	7	4261	155
TCONS_00007758	102168399	CHRND	protein_coding	Novel_lncRNA	Chr 2	15564513	15565147	+	2	255	84
TCONS_00007775	102179145	PDE6D	protein_coding	Novel_lncRNA	Chr 2	16236483	16251125	+	2	1258	126
TCONS_00007905	XLOC_005154	XLOC_005154	novel	Novel_lncRNA	Chr 2	20147849	20148940	+	2	229	44
TCONS_00007942	XLOC_005184	XLOC_005184	novel	Novel_lncRNA	Chr 2	21557495	21620677	+	3	250	59
TCONS_00008001	102185961	KCNE4	protein_coding	Novel_lncRNA	Chr 2	24590879	24592164	+	2	740	170
TCONS_00008012	XLOC_005237	XLOC_005237	novel	Novel_lncRNA	Chr 2	25568138	25717680	+	4	6450	168
TCONS_00008018	XLOC_005237	XLOC_005237	novel	Novel_lncRNA	Chr 2	25687259	25717680	+	4	6439	133
TCONS_00008161	106503302	ZNF142	protein_coding	Novel_lncRNA	Chr 2	29177679	29188453	+	9	5545	445
TCONS_00008162	106503302	ZNF142	protein_coding	Novel_lncRNA	Chr 2	29177679	29188453	+	9	5562	445
TCONS_00008196	100861377	PNKD	protein_coding	Novel_lncRNA	Chr 2	29427688	29481876	+	2	1959	118
TCONS_00008252	XLOC_005370	XLOC_005370	novel	Novel_lncRNA	Chr 2	30914851	30919957	+	2	279	93
TCONS_00008273	XLOC_005387	XLOC_005387	novel	Novel_lncRNA	Chr 2	31285417	31286887	+	2	751	145
TCONS_00008397	XLOC_005459	XLOC_005459	novel	Novel_lncRNA	Chr 2	39422217	39425593	+	2	1000	120
TCONS_00008417	102185790	METTL21A	protein_coding	Novel_lncRNA	Chr 2	40010211	40067051	+	4	4961	156
TCONS_00008419	102185790	METTL21A	protein_coding	Novel_lncRNA	Chr 2	40010211	40100004	+	6	5073	217
TCONS_00008424	102185790	METTL21A	protein_coding	Novel_lncRNA	Chr 2	40031364	40085514	+	9	5202	327
TCONS_00008425	102185790	METTL21A	protein_coding	Novel_lncRNA	Chr 2	40032924	40085435	+	8	3858	327
TCONS_00008493	102179425	CTLA4	protein_coding	Novel_lncRNA	Chr 2	43870380	43898553	+	2	536	84
TCONS_00008517	102175813	CARF	protein_coding	Novel_lncRNA	Chr 2	44671817	44676999	+	2	437	87
TCONS_00008571	102169919	CASP8	protein_coding	Novel_lncRNA	Chr 2	46088822	46101079	+	2	304	101
TCONS_00008609	102188176	LOC102188176	protein_coding	Novel_lncRNA	Chr 2	46598253	46599079	+	2	388	76
TCONS_00008715	102182267	C2H2orf66	protein_coding	Novel_lncRNA	Chr 2	50557622	50559526	+	2	218	38
TCONS_00008727	102169918	HECW2	protein_coding	Novel_lncRNA	Chr 2	51059057	51079407	+	2	2246	222
TCONS_00008728	102169918	HECW2	protein_coding	Novel_lncRNA	Chr 2	51059122	51079407	+	2	2173	222
TCONS_00008754	102189720	MYO1B	protein_coding	Novel_lncRNA	Chr 2	56002564	56008495	+	2	1945	126
TCONS_00008770	XLOC_005684	XLOC_005684	novel	Novel_lncRNA	Chr 2	56567552	56581201	+	3	400	80
TCONS_00008883	102182546	C2H2orf76	protein_coding	Novel_lncRNA	Chr 2	64935666	64938910	+	3	443	51
TCONS_00008900	XLOC_005785	XLOC_005785	novel	Novel_lncRNA	Chr 2	65526754	65529872	+	2	376	114
TCONS_00008915	XLOC_005799	XLOC_005799	novel	Novel_lncRNA	Chr 2	66394406	66396359	+	2	1505	133
TCONS_00008946	XLOC_005826	XLOC_005826	novel	Novel_lncRNA	Chr 2	70768999	70790297	+	2	807	75
TCONS_00009051	102170472	LCT	protein_coding	Novel_lncRNA	Chr 2	74695558	74701230	+	2	665	125
TCONS_00009108	102190740	GTDC1	protein_coding	Novel_lncRNA	Chr 2	83901192	83969925	+	2	310	103
TCONS_00009109	102190740	GTDC1	protein_coding	Novel_lncRNA	Chr 2	83956413	83969925	+	2	1006	89
TCONS_00009396	102174882	ACVR1C	protein_coding	Novel_lncRNA	Chr 2	97391038	97419251	+	2	247	82
TCONS_00009399	100860926	ACVR1	protein_coding	Novel_lncRNA	Chr 2	97663683	97719915	+	2	356	118
TCONS_00009495	102187275	LOC102187275	protein_coding	Novel_lncRNA	Chr 2	100074957	100208802	+	14	4219	550
TCONS_00009496	102187275	LOC102187275	protein_coding	Novel_lncRNA	Chr 2	100074957	100296146	+	14	4243	558
TCONS_00009497	102187275	LOC102187275	protein_coding	Novel_lncRNA	Chr 2	100076521	100208802	+	14	2646	547
TCONS_00009498	102187275	LOC102187275	protein_coding	Novel_lncRNA	Chr 2	100077271	100296146	+	14	1938	561
TCONS_00009499	102187275	LOC102187275	protein_coding	Novel_lncRNA	Chr 2	100077969	100208802	+	13	1995	546
TCONS_00009500	102187275	LOC102187275	protein_coding	Novel_lncRNA	Chr 2	100077969	100208802	+	13	2007	550
TCONS_00009604	XLOC_006225	XLOC_006225	novel	Novel_lncRNA	Chr 2	107548081	107550991	+	2	282	68
TCONS_00009843	XLOC_006375	XLOC_006375	novel	Novel_lncRNA	Chr 2	114619212	114620320	+	2	236	39
TCONS_00009846	XLOC_006378	XLOC_006378	novel	Novel_lncRNA	Chr 2	115228984	115281814	+	2	218	70
TCONS_00009932	XLOC_006435	XLOC_006435	novel	Novel_lncRNA	Chr 2	116818080	116827658	+	4	606	93
TCONS_00010191	102184848	GULP1	protein_coding	Novel_lncRNA	Chr 2	128363866	128619754	+	5	1710	164
TCONS_00010230	102183015	ANKAR	protein_coding	Novel_lncRNA	Chr 2	129903911	129913323	+	4	2737	159
TCONS_00010286	102177382	C2H2orf88	protein_coding	Novel_lncRNA	Chr 2	130376195	130435005	+	4	446	111
TCONS_00010290	102176832	INPP1	protein_coding	Novel_lncRNA	Chr 2	130554498	130568681	+	3	4033	138
TCONS_00010341	XLOC_006716	XLOC_006716	novel	Novel_lncRNA	Chr 2	131122725	131128128	+	2	2006	154
TCONS_00010350	XLOC_006722	XLOC_006722	novel	Novel_lncRNA	Chr 2	131295775	131298037	+	2	2211	112
TCONS_00010367	102175064	GPR17	protein_coding	Novel_lncRNA	Chr 2	131638208	131678476	+	5	2049	418
TCONS_00010482	106503629	LOC106503629	protein_coding	Novel_lncRNA	Chr 2	17360	39232	-	5	1779	139
TCONS_00010526	XLOC_006813	XLOC_006813	novel	Novel_lncRNA	Chr 2	474008	475902	-	2	233	77
TCONS_00010554	108638510	LOC108638510	protein_coding	Novel_lncRNA	Chr 2	1016448	1075290	-	4	678	162
TCONS_00010588	XLOC_006859	XLOC_006859	novel	Novel_lncRNA	Chr 2	1359481	1363363	-	2	3180	343
TCONS_00010629	XLOC_006887	XLOC_006887	novel	Novel_lncRNA	Chr 2	2685209	2689908	-	2	1408	227
TCONS_00010666	102168220	PLA2G2C	protein_coding	Novel_lncRNA	Chr 2	3507007	3511886	-	2	217	72
TCONS_00010670	102191385	VWA5B1	protein_coding	Novel_lncRNA	Chr 2	3691552	3703072	-	2	284	93
TCONS_00010743	XLOC_006941	XLOC_006941	novel	Novel_lncRNA	Chr 2	4672784	4699464	-	2	415	110
TCONS_00010774	102188909	LDLRAD2	protein_coding	Novel_lncRNA	Chr 2	4986101	4987197	-	2	480	128
TCONS_00010803	102187279	C1QC	protein_coding	Novel_lncRNA	Chr 2	5777653	5782032	-	2	910	282
TCONS_00010851	XLOC_006993	XLOC_006993	novel	Novel_lncRNA	Chr 2	6475628	6480826	-	2	654	99
TCONS_00010929	XLOC_007043	XLOC_007043	novel	Novel_lncRNA	Chr 2	7087765	7088299	-	2	446	77
TCONS_00010966	XLOC_007063	XLOC_007063	novel	Novel_lncRNA	Chr 2	7841532	7843638	-	2	1171	129
TCONS_00010978	XLOC_007077	XLOC_007077	novel	Novel_lncRNA	Chr 2	8171039	8172577	-	2	670	84
TCONS_00010992	102174443	TMEM57	protein_coding	Novel_lncRNA	Chr 2	8341683	8349274	-	3	445	98
TCONS_00011032	XLOC_007115	XLOC_007115	novel	Novel_lncRNA	Chr 2	8937897	8938306	-	2	320	68
TCONS_00011039	102181450	FAM110D	protein_coding	Novel_lncRNA	Chr 2	9018495	9020317	-	2	1709	314
TCONS_00011055	102170833	CEP85	protein_coding	Novel_lncRNA	Chr 2	9119892	9121104	-	2	962	92
TCONS_00011152	XLOC_007193	XLOC_007193	novel	Novel_lncRNA	Chr 2	10173925	10175035	-	2	257	85
TCONS_00011235	108637382	LOC108637382	protein_coding	Novel_lncRNA	Chr 2	11349217	11538522	-	20	2848	883
TCONS_00011321	XLOC_007298	XLOC_007298	novel	Novel_lncRNA	Chr 2	13850586	13850972	-	2	252	82
TCONS_00011360	XLOC_007321	XLOC_007321	novel	Novel_lncRNA	Chr 2	14092209	14096225	-	3	2742	95
TCONS_00011366	XLOC_007327	XLOC_007327	novel	Novel_lncRNA	Chr 2	14186159	14209009	-	3	336	99
TCONS_00011411	102185408	ZBTB8OS	protein_coding	Novel_lncRNA	Chr 2	14667532	14718028	-	2	2013	103
TCONS_00011476	102181080	PHC2	protein_coding	Novel_lncRNA	Chr 2	15449302	15472721	-	2	2151	241
TCONS_00011778	106503182	LOC106503182	protein_coding	Novel_lncRNA	Chr 2	28390598	28391401	-	2	615	112
TCONS_00011780	106503182	LOC106503182	protein_coding	Novel_lncRNA	Chr 2	28390598	28393090	-	3	1708	119
TCONS_00011854	102179057	CRYBA2	protein_coding	Novel_lncRNA	Chr 2	28866844	28878186	-	2	2028	132
TCONS_00011855	102179057	CRYBA2	protein_coding	Novel_lncRNA	Chr 2	28870869	28878186	-	2	482	160
TCONS_00011909	102168779	USP37	protein_coding	Novel_lncRNA	Chr 2	29352302	29357182	-	2	3544	113
TCONS_00012066	102169342	KANSL1L	protein_coding	Novel_lncRNA	Chr 2	37907801	37993509	-	2	2176	130
TCONS_00012222	102179425	CTLA4	protein_coding	Novel_lncRNA	Chr 2	43866359	43898851	-	2	4855	154
TCONS_00012405	102174784	PLCL1	protein_coding	Novel_lncRNA	Chr 2	49629032	49640328	-	2	8356	305
TCONS_00012406	XLOC_007919	XLOC_007919	novel	Novel_lncRNA	Chr 2	49640526	49651430	-	2	490	75
TCONS_00012426	102171664	COQ10B	protein_coding	Novel_lncRNA	Chr 2	49949674	50012494	-	26	9017	1375
TCONS_00012477	102190362	NABP1	protein_coding	Novel_lncRNA	Chr 2	55719244	55733944	-	2	13870	211
TCONS_00012480	102190362	NABP1	protein_coding	Novel_lncRNA	Chr 2	55719244	55733944	-	3	13198	216
TCONS_00012481	102190362	NABP1	protein_coding	Novel_lncRNA	Chr 2	55719244	55733944	-	3	13575	216
TCONS_00012482	102190362	NABP1	protein_coding	Novel_lncRNA	Chr 2	55719244	55733944	-	4	12367	216
TCONS_00012483	102190362	NABP1	protein_coding	Novel_lncRNA	Chr 2	55719244	55733944	-	4	11889	216
TCONS_00012559	102178402	GLI2	protein_coding	Novel_lncRNA	Chr 2	63538269	63638082	-	3	919	228
TCONS_00012591	100861273	EPB41L5	protein_coding	Novel_lncRNA	Chr 2	64302867	64309250	-	2	4086	124
TCONS_00012628	XLOC_008062	XLOC_008062	novel	Novel_lncRNA	Chr 2	65526754	65529847	-	2	351	114
TCONS_00012787	102190740	GTDC1	protein_coding	Novel_lncRNA	Chr 2	83899801	83969888	-	2	6430	223
TCONS_00012823	102189526	ORC4	protein_coding	Novel_lncRNA	Chr 2	88083729	88135239	-	5	1198	125
TCONS_00012992	102177384	GALNT13	protein_coding	Novel_lncRNA	Chr 2	94142681	94246844	-	4	1175	167
TCONS_00012993	102177384	GALNT13	protein_coding	Novel_lncRNA	Chr 2	94230125	94246426	-	5	572	144
TCONS_00012994	102177384	GALNT13	protein_coding	Novel_lncRNA	Chr 2	94233270	94246844	-	5	1539	112
TCONS_00013112	102168948	LOC102168948	protein_coding	Novel_lncRNA	Chr 2	99597114	99622434	-	6	3128	121
TCONS_00013228	102177937	SCN7A	protein_coding	Novel_lncRNA	Chr 2	106453988	106464106	-	2	593	146
TCONS_00013263	XLOC_008448	XLOC_008448	novel	Novel_lncRNA	Chr 2	109497708	109513759	-	3	322	60
TCONS_00013285	102169228	METTL5	protein_coding	Novel_lncRNA	Chr 2	109748297	109757752	-	13	3098	416
TCONS_00013316	102189631	METTL8	protein_coding	Novel_lncRNA	Chr 2	111206002	111270066	-	4	615	115
TCONS_00013484	XLOC_008607	XLOC_008607	novel	Novel_lncRNA	Chr 2	115583058	115584712	-	3	569	156
TCONS_00013485	XLOC_008607	XLOC_008607	novel	Novel_lncRNA	Chr 2	115583058	115584900	-	3	499	133
TCONS_00013548	XLOC_008660	XLOC_008660	novel	Novel_lncRNA	Chr 2	116983472	116991981	-	2	2803	111
TCONS_00013561	102174783	OSBPL6	protein_coding	Novel_lncRNA	Chr 2	117764748	117833859	-	2	374	57
TCONS_00013619	102172944	CCDC141	protein_coding	Novel_lncRNA	Chr 2	118331725	118333997	-	2	297	98
TCONS_00013637	102171197	ZNF385B	protein_coding	Novel_lncRNA	Chr 2	118948240	119025319	-	4	663	130
TCONS_00013708	XLOC_008750	XLOC_008750	novel	Novel_lncRNA	Chr 2	122700041	122706422	-	2	213	71
TCONS_00013781	XLOC_008810	XLOC_008810	novel	Novel_lncRNA	Chr 2	129363964	129548205	-	4	1410	81
TCONS_00013801	XLOC_008810	XLOC_008810	novel	Novel_lncRNA	Chr 2	129465886	129548205	-	4	2364	121
TCONS_00013811	XLOC_008810	XLOC_008810	novel	Novel_lncRNA	Chr 2	129482648	129548211	-	3	1615	111
TCONS_00013877	102176368	MFSD6	protein_coding	Novel_lncRNA	Chr 2	130610641	130645609	-	2	621	109
TCONS_00013925	XLOC_008900	XLOC_008900	novel	Novel_lncRNA	Chr 2	131123050	131127102	-	2	655	136
TCONS_00014013	102172576	SAP130	protein_coding	Novel_lncRNA	Chr 2	132068883	132071445	-	3	410	109
TCONS_00014037	102169429	PTPN18	protein_coding	Novel_lncRNA	Chr 2	135193155	135195056	-	2	1689	177
TCONS_00116533	XLOC_073286	XLOC_073286	novel	Novel_lncRNA	Chr 20	381767	479077	+	3	1518	124
TCONS_00116546	XLOC_073299	XLOC_073299	novel	Novel_lncRNA	Chr 20	447887	451426	+	3	509	100
TCONS_00116599	XLOC_073332	XLOC_073332	novel	Novel_lncRNA	Chr 20	3344047	3349109	+	2	331	54
TCONS_00116600	XLOC_073333	XLOC_073333	novel	Novel_lncRNA	Chr 20	3364228	3422550	+	4	2070	138
TCONS_00116601	XLOC_073333	XLOC_073333	novel	Novel_lncRNA	Chr 20	3364256	3370359	+	2	382	92
TCONS_00116602	XLOC_073333	XLOC_073333	novel	Novel_lncRNA	Chr 20	3364277	3422550	+	5	2113	138
TCONS_00116639	XLOC_073362	XLOC_073362	novel	Novel_lncRNA	Chr 20	4308510	4321736	+	2	219	60
TCONS_00116652	XLOC_073374	XLOC_073374	novel	Novel_lncRNA	Chr 20	4551506	4553254	+	3	305	98
TCONS_00116682	102189904	ATP6V0E1	protein_coding	Novel_lncRNA	Chr 20	4794789	4823044	+	2	688	71
TCONS_00116722	XLOC_073434	XLOC_073434	novel	Novel_lncRNA	Chr 20	5391045	5391914	+	2	339	75
TCONS_00116778	XLOC_073474	XLOC_073474	novel	Novel_lncRNA	Chr 20	8210031	8228758	+	2	471	117
TCONS_00116846	102177751	SLC30A5	protein_coding	Novel_lncRNA	Chr 20	10552503	10567680	+	2	439	127
TCONS_00116887	102190549	SREK1	protein_coding	Novel_lncRNA	Chr 20	13486594	13493286	+	2	675	85
TCONS_00116955	102181994	ERCC8	protein_coding	Novel_lncRNA	Chr 20	18379148	18390461	+	3	1735	88
TCONS_00116972	102183183	PDE4D	protein_coding	Novel_lncRNA	Chr 20	19116843	19325870	+	3	444	97
TCONS_00116975	102183183	PDE4D	protein_coding	Novel_lncRNA	Chr 20	19575433	19682507	+	2	13089	158
TCONS_00117003	102187265	SETD9	protein_coding	Novel_lncRNA	Chr 20	22371157	22375245	+	2	251	72
TCONS_00117079	102169421	HSPB3	protein_coding	Novel_lncRNA	Chr 20	24689583	24701195	+	2	3123	174
TCONS_00117102	XLOC_073701	XLOC_073701	novel	Novel_lncRNA	Chr 20	25823232	25833878	+	2	209	59
TCONS_00117169	102175523	C20H5orf34	protein_coding	Novel_lncRNA	Chr 20	31276175	31278175	+	3	1689	131
TCONS_00117170	102175523	C20H5orf34	protein_coding	Novel_lncRNA	Chr 20	31276301	31280761	+	2	1460	131
TCONS_00117285	XLOC_073840	XLOC_073840	novel	Novel_lncRNA	Chr 20	33983388	34003948	+	2	213	47
TCONS_00117291	XLOC_073846	XLOC_073846	novel	Novel_lncRNA	Chr 20	34845233	34876568	+	2	273	90
TCONS_00117331	102184003	OSMR	protein_coding	Novel_lncRNA	Chr 20	35537429	35621224	+	3	1653	200
TCONS_00117332	102184003	OSMR	protein_coding	Novel_lncRNA	Chr 20	35537677	35621224	+	3	1418	200
TCONS_00117333	102184003	OSMR	protein_coding	Novel_lncRNA	Chr 20	35537677	35642568	+	3	428	91
TCONS_00117334	102184003	OSMR	protein_coding	Novel_lncRNA	Chr 20	35537677	35642568	+	3	441	117
TCONS_00117368	102169798	GDNF	protein_coding	Novel_lncRNA	Chr 20	36600485	36610254	+	3	3216	341
TCONS_00117491	XLOC_073986	XLOC_073986	novel	Novel_lncRNA	Chr 20	41414744	41417113	+	2	2264	114
TCONS_00117642	XLOC_074127	XLOC_074127	novel	Novel_lncRNA	Chr 20	50831517	50831939	+	2	244	38
TCONS_00117752	102179046	ANKRD33B	protein_coding	Novel_lncRNA	Chr 20	62616617	62629362	+	2	7026	348
TCONS_00117812	102172667	SRD5A1	protein_coding	Novel_lncRNA	Chr 20	66521385	66523514	+	2	463	124
TCONS_00117819	XLOC_074260	XLOC_074260	novel	Novel_lncRNA	Chr 20	66625027	66626524	+	2	234	60
TCONS_00117870	XLOC_074301	XLOC_074301	novel	Novel_lncRNA	Chr 20	70824442	70825936	+	2	290	86
TCONS_00117958	102184554	LCP2	protein_coding	Novel_lncRNA	Chr 20	2245433	2256127	-	3	1624	121
TCONS_00117959	102184554	LCP2	protein_coding	Novel_lncRNA	Chr 20	2249816	2256129	-	2	1808	131
TCONS_00117979	XLOC_074373	XLOC_074373	novel	Novel_lncRNA	Chr 20	3447452	3448371	-	2	212	70
TCONS_00118013	XLOC_074393	XLOC_074393	novel	Novel_lncRNA	Chr 20	4293178	4366346	-	2	450	129
TCONS_00118030	XLOC_074407	XLOC_074407	novel	Novel_lncRNA	Chr 20	4575877	4587656	-	2	3930	154
TCONS_00118064	XLOC_074438	XLOC_074438	novel	Novel_lncRNA	Chr 20	5036584	5037151	-	2	210	69
TCONS_00118130	XLOC_074490	XLOC_074490	novel	Novel_lncRNA	Chr 20	8207031	8228927	-	2	3644	149
TCONS_00118131	XLOC_074490	XLOC_074490	novel	Novel_lncRNA	Chr 20	8207031	8228927	-	2	3640	173
TCONS_00118138	102174158	TMEM171	protein_coding	Novel_lncRNA	Chr 20	8515927	8551539	-	2	209	69
TCONS_00118213	102180566	MRPS36	protein_coding	Novel_lncRNA	Chr 20	10468307	10477711	-	4	1589	94
TCONS_00118321	XLOC_074619	XLOC_074619	novel	Novel_lncRNA	Chr 20	13160095	13360303	-	3	215	65
TCONS_00118515	102189244	SLC38A9	protein_coding	Novel_lncRNA	Chr 20	23493663	23495808	-	2	524	111
TCONS_00118519	XLOC_074744	XLOC_074744	novel	Novel_lncRNA	Chr 20	23634589	23635364	-	2	423	73
TCONS_00118534	102190911	GPX8	protein_coding	Novel_lncRNA	Chr 20	23993606	23998452	-	3	932	160
TCONS_00118556	XLOC_074771	XLOC_074771	novel	Novel_lncRNA	Chr 20	24543470	24543954	-	2	465	64
TCONS_00118586	XLOC_074800	XLOC_074800	novel	Novel_lncRNA	Chr 20	24818636	24821627	-	2	1298	118
TCONS_00118680	XLOC_074872	XLOC_074872	novel	Novel_lncRNA	Chr 20	31707661	31708557	-	2	493	121
TCONS_00118778	102184003	OSMR	protein_coding	Novel_lncRNA	Chr 20	35516984	35538457	-	3	440	102
TCONS_00118791	108638393	LOC108638393	protein_coding	Novel_lncRNA	Chr 20	35849244	35851762	-	2	767	254
TCONS_00118967	102175716	MYO10	protein_coding	Novel_lncRNA	Chr 20	56156351	56158065	-	2	471	125
TCONS_00118981	102176562	FBXL7	protein_coding	Novel_lncRNA	Chr 20	57321715	57624310	-	3	1709	203
TCONS_00119000	102177099	FAM105A	protein_coding	Novel_lncRNA	Chr 20	58514993	58524847	-	2	512	102
TCONS_00119085	XLOC_075165	XLOC_075165	novel	Novel_lncRNA	Chr 20	67015296	67015805	-	2	417	90
TCONS_00119209	102188534	LOC102188534	protein_coding	Novel_lncRNA	Chr 21	1156278	1165028	+	3	8082	127
TCONS_00119211	102188534	LOC102188534	protein_coding	Novel_lncRNA	Chr 21	1161908	1285349	+	27	8568	189
TCONS_00119212	102188534	LOC102188534	protein_coding	Novel_lncRNA	Chr 21	1161908	1285349	+	26	8559	189
TCONS_00119225	102188534	LOC102188534	protein_coding	Novel_lncRNA	Chr 21	1168938	1262354	+	21	2885	189
TCONS_00119226	102188534	LOC102188534	protein_coding	Novel_lncRNA	Chr 21	1169480	1285349	+	21	6154	189
TCONS_00119227	102188534	LOC102188534	protein_coding	Novel_lncRNA	Chr 21	1169522	1285349	+	19	5849	189
TCONS_00119228	102188534	LOC102188534	protein_coding	Novel_lncRNA	Chr 21	1169522	1285349	+	23	6443	189
TCONS_00119231	102188534	LOC102188534	protein_coding	Novel_lncRNA	Chr 21	1170116	1285349	+	26	6310	189
TCONS_00119232	102188534	LOC102188534	protein_coding	Novel_lncRNA	Chr 21	1172906	1285349	+	22	6017	189
TCONS_00119233	102188534	LOC102188534	protein_coding	Novel_lncRNA	Chr 21	1182534	1188416	+	2	361	65
TCONS_00119234	102188534	LOC102188534	protein_coding	Novel_lncRNA	Chr 21	1187100	1192918	+	2	323	100
TCONS_00119235	102188534	LOC102188534	protein_coding	Novel_lncRNA	Chr 21	1187728	1193633	+	3	411	136
TCONS_00119237	102188534	LOC102188534	protein_coding	Novel_lncRNA	Chr 21	1227848	1231368	+	2	750	106
TCONS_00119238	102188534	LOC102188534	protein_coding	Novel_lncRNA	Chr 21	1254398	1285349	+	6	4072	143
TCONS_00119239	102188534	LOC102188534	protein_coding	Novel_lncRNA	Chr 21	1276679	1285349	+	5	3273	143
TCONS_00119376	XLOC_075359	XLOC_075359	novel	Novel_lncRNA	Chr 21	9025183	9026241	+	2	389	81
TCONS_00119378	XLOC_075361	XLOC_075361	novel	Novel_lncRNA	Chr 21	9029046	9037097	+	3	356	78
TCONS_00119391	102183184	NR2F2	protein_coding	Novel_lncRNA	Chr 21	9825787	9871416	+	2	959	168
TCONS_00119392	102183184	NR2F2	protein_coding	Novel_lncRNA	Chr 21	9825882	9871416	+	2	620	129
TCONS_00119421	XLOC_075396	XLOC_075396	novel	Novel_lncRNA	Chr 21	12318847	12367147	+	2	215	66
TCONS_00119423	XLOC_075398	XLOC_075398	novel	Novel_lncRNA	Chr 21	13118157	13123835	+	2	1142	110
TCONS_00119424	XLOC_075398	XLOC_075398	novel	Novel_lncRNA	Chr 21	13123092	13123835	+	2	482	111
TCONS_00119454	XLOC_075423	XLOC_075423	novel	Novel_lncRNA	Chr 21	13488112	13489248	+	2	653	104
TCONS_00119492	102184845	AKAP13	protein_coding	Novel_lncRNA	Chr 21	15509421	15574506	+	2	3083	155
TCONS_00119526	XLOC_075478	XLOC_075478	novel	Novel_lncRNA	Chr 21	17966246	17970125	+	2	693	150
TCONS_00119538	XLOC_075489	XLOC_075489	novel	Novel_lncRNA	Chr 21	18828138	18841854	+	2	469	71
TCONS_00119550	102177379	LOC102177379	protein_coding	Novel_lncRNA	Chr 21	18923070	18940569	+	2	1401	158
TCONS_00119551	102177379	LOC102177379	protein_coding	Novel_lncRNA	Chr 21	18923481	18940569	+	2	1001	143
TCONS_00119556	108638532	LOC108638532	protein_coding	Novel_lncRNA	Chr 21	18965575	19125123	+	2	850	126
TCONS_00119557	108638532	LOC108638532	protein_coding	Novel_lncRNA	Chr 21	18965742	19124788	+	2	360	89
TCONS_00119692	XLOC_075586	XLOC_075586	novel	Novel_lncRNA	Chr 21	21528662	21541600	+	2	247	49
TCONS_00119806	102169802	LOC102169802	protein_coding	Novel_lncRNA	Chr 21	24336723	24343828	+	3	1394	116
TCONS_00119836	102172393	LOC102172393	protein_coding	Novel_lncRNA	Chr 21	25593651	25604257	+	2	246	81
TCONS_00119971	102186909	ADAMTS7	protein_coding	Novel_lncRNA	Chr 21	29909380	29915894	+	2	526	174
TCONS_00120199	XLOC_075899	XLOC_075899	novel	Novel_lncRNA	Chr 21	37500890	37501945	+	2	615	45
TCONS_00120209	106503372	PRKD1	protein_coding	Novel_lncRNA	Chr 21	39915377	39919926	+	2	472	144
TCONS_00120250	XLOC_075924	XLOC_075924	novel	Novel_lncRNA	Chr 21	41403585	41410994	+	3	321	69
TCONS_00120328	XLOC_075985	XLOC_075985	novel	Novel_lncRNA	Chr 21	44391782	44395407	+	3	340	79
TCONS_00120390	XLOC_076031	XLOC_076031	novel	Novel_lncRNA	Chr 21	45493292	45518177	+	3	3455	121
TCONS_00120668	102169525	BTBD7	protein_coding	Novel_lncRNA	Chr 21	57379241	57408164	+	2	456	109
TCONS_00120691	102184560	LOC102184560	protein_coding	Novel_lncRNA	Chr 21	58046939	58053086	+	3	1196	139
TCONS_00120727	102174605	LOC102174605	protein_coding	Novel_lncRNA	Chr 21	58838876	58841134	+	2	224	62
TCONS_00120770	102177102	AK7	protein_coding	Novel_lncRNA	Chr 21	60614337	60674400	+	2	207	51
TCONS_00120888	102191280	LOC102191280	protein_coding	Novel_lncRNA	Chr 21	64994967	65019148	+	6	6844	196
TCONS_00120889	102191280	LOC102191280	protein_coding	Novel_lncRNA	Chr 21	64994967	65019148	+	6	10900	219
TCONS_00120988	102169526	PPP2R5C	protein_coding	Novel_lncRNA	Chr 21	65937135	66004037	+	4	914	138
TCONS_00121017	XLOC_076380	XLOC_076380	novel	Novel_lncRNA	Chr 21	66240945	66245015	+	2	1104	177
TCONS_00121092	XLOC_076408	XLOC_076408	novel	Novel_lncRNA	Chr 21	67057042	67066041	+	2	2741	193
TCONS_00121100	108638534	LOC108638534	protein_coding	Novel_lncRNA	Chr 21	67153370	67155296	+	2	1819	269
TCONS_00121139	XLOC_076431	XLOC_076431	novel	Novel_lncRNA	Chr 21	67449231	67454066	+	2	1118	149
TCONS_00121140	XLOC_076431	XLOC_076431	novel	Novel_lncRNA	Chr 21	67449231	67454066	+	2	1126	149
TCONS_00121168	XLOC_076444	XLOC_076444	novel	Novel_lncRNA	Chr 21	67732196	67733999	+	2	1364	131
TCONS_00121179	108638457	LOC108638457	protein_coding	Novel_lncRNA	Chr 21	68393335	68396732	+	2	2268	262
TCONS_00121184	108633256	BRF1	protein_coding	Novel_lncRNA	Chr 21	68407844	68414037	+	5	3217	587
TCONS_00121186	108633256	BRF1	protein_coding	Novel_lncRNA	Chr 21	68409960	68414037	+	4	3690	587
TCONS_00121212	106504019	TEX22	protein_coding	Novel_lncRNA	Chr 21	68527285	68546174	+	3	4430	298
TCONS_00121213	106504019	TEX22	protein_coding	Novel_lncRNA	Chr 21	68527285	68546174	+	3	4422	339
TCONS_00121214	106504019	TEX22	protein_coding	Novel_lncRNA	Chr 21	68527285	68546174	+	3	6530	611
TCONS_00121215	106504019	TEX22	protein_coding	Novel_lncRNA	Chr 21	68527285	68546174	+	2	6398	567
TCONS_00121227	102185402	LOC102185402	protein_coding	Novel_lncRNA	Chr 21	68594100	68597425	+	2	2506	307
TCONS_00121249	102188806	AHNAK2	protein_coding	Novel_lncRNA	Chr 21	68765421	68766292	+	2	368	122
TCONS_00121422	102171194	TTC23	protein_coding	Novel_lncRNA	Chr 21	6795231	6807538	-	3	589	131
TCONS_00121439	100861165	IGF1R	protein_coding	Novel_lncRNA	Chr 21	7337224	7343125	-	2	5662	249
TCONS_00121446	XLOC_076603	XLOC_076603	novel	Novel_lncRNA	Chr 21	7913706	7968423	-	2	375	124
TCONS_00121456	XLOC_076608	XLOC_076608	novel	Novel_lncRNA	Chr 21	8934918	8946519	-	2	253	84
TCONS_00121465	XLOC_076616	XLOC_076616	novel	Novel_lncRNA	Chr 21	9025162	9026081	-	2	250	44
TCONS_00121545	XLOC_076686	XLOC_076686	novel	Novel_lncRNA	Chr 21	11236371	11244999	-	2	475	107
TCONS_00121558	XLOC_076695	XLOC_076695	novel	Novel_lncRNA	Chr 21	12358358	12367238	-	2	359	82
TCONS_00121565	XLOC_076702	XLOC_076702	novel	Novel_lncRNA	Chr 21	13065886	13086521	-	6	850	150
TCONS_00121578	XLOC_076715	XLOC_076715	novel	Novel_lncRNA	Chr 21	13154653	13183314	-	3	299	96
TCONS_00121607	XLOC_076728	XLOC_076728	novel	Novel_lncRNA	Chr 21	13480119	13489364	-	3	1000	143
TCONS_00121608	XLOC_076728	XLOC_076728	novel	Novel_lncRNA	Chr 21	13480119	13490695	-	3	916	103
TCONS_00121614	XLOC_076734	XLOC_076734	novel	Novel_lncRNA	Chr 21	13496927	13498851	-	2	1905	98
TCONS_00121673	XLOC_076779	XLOC_076779	novel	Novel_lncRNA	Chr 21	17966265	17970074	-	2	623	150
TCONS_00121738	108638532	LOC108638532	protein_coding	Novel_lncRNA	Chr 21	19045223	19086954	-	4	831	176
TCONS_00121759	102188900	ACAN	protein_coding	Novel_lncRNA	Chr 21	19736575	19737988	-	2	300	99
TCONS_00121766	102189162	ABHD2	protein_coding	Novel_lncRNA	Chr 21	19877474	19881266	-	2	3637	162
TCONS_00121767	102189162	ABHD2	protein_coding	Novel_lncRNA	Chr 21	19877474	19881266	-	2	3587	154
TCONS_00121827	XLOC_076878	XLOC_076878	novel	Novel_lncRNA	Chr 21	20934368	20935598	-	2	1124	204
TCONS_00121873	102187990	FURIN	protein_coding	Novel_lncRNA	Chr 21	21080600	21086721	-	2	438	84
TCONS_00121895	106501720	ZNF774	protein_coding	Novel_lncRNA	Chr 21	21523939	21528358	-	3	1017	122
TCONS_00121896	106501720	ZNF774	protein_coding	Novel_lncRNA	Chr 21	21523939	21528706	-	3	1001	122
TCONS_00121969	XLOC_076945	XLOC_076945	novel	Novel_lncRNA	Chr 21	22882828	22886132	-	2	3037	147
TCONS_00122047	102175527	CEMIP	protein_coding	Novel_lncRNA	Chr 21	26400613	26404064	-	2	234	53
TCONS_00122058	XLOC_077018	XLOC_077018	novel	Novel_lncRNA	Chr 21	26556472	26558662	-	2	215	58
TCONS_00122069	XLOC_077026	XLOC_077026	novel	Novel_lncRNA	Chr 21	26950617	26950933	-	2	208	53
TCONS_00122121	102186909	ADAMTS7	protein_coding	Novel_lncRNA	Chr 21	29908762	29915737	-	2	987	156
TCONS_00122122	102186909	ADAMTS7	protein_coding	Novel_lncRNA	Chr 21	29912200	29915737	-	2	459	132
TCONS_00122168	102184950	NRG4	protein_coding	Novel_lncRNA	Chr 21	30718691	30779137	-	12	1787	387
TCONS_00122169	102184950	NRG4	protein_coding	Novel_lncRNA	Chr 21	30718691	30779255	-	13	1972	396
TCONS_00122180	102184950	NRG4	protein_coding	Novel_lncRNA	Chr 21	30808722	30926416	-	10	1334	149
TCONS_00122182	102184950	NRG4	protein_coding	Novel_lncRNA	Chr 21	30820770	30926334	-	8	860	101
TCONS_00122183	102184950	NRG4	protein_coding	Novel_lncRNA	Chr 21	30820770	30926334	-	8	856	101
TCONS_00122184	102184950	NRG4	protein_coding	Novel_lncRNA	Chr 21	30820770	30926334	-	9	907	101
TCONS_00122185	102184950	NRG4	protein_coding	Novel_lncRNA	Chr 21	30820770	30926334	-	7	741	87
TCONS_00122195	XLOC_077105	XLOC_077105	novel	Novel_lncRNA	Chr 21	31054052	31062693	-	2	500	78
TCONS_00122296	XLOC_077175	XLOC_077175	novel	Novel_lncRNA	Chr 21	33070579	33070944	-	2	286	66
TCONS_00122491	102177665	DTD2	protein_coding	Novel_lncRNA	Chr 21	41395582	41403469	-	3	3967	107
TCONS_00122648	XLOC_077349	XLOC_077349	novel	Novel_lncRNA	Chr 21	44250473	44264153	-	2	3565	144
TCONS_00122892	XLOC_077622	XLOC_077622	novel	Novel_lncRNA	Chr 21	54764814	54766708	-	2	237	71
TCONS_00122918	102186346	WDR76	protein_coding	Novel_lncRNA	Chr 21	54946524	54955047	-	2	372	124
TCONS_00122985	102183460	ITPK1	protein_coding	Novel_lncRNA	Chr 21	57215405	57217655	-	2	508	114
TCONS_00123039	XLOC_077710	XLOC_077710	novel	Novel_lncRNA	Chr 21	58258363	58265791	-	4	814	96
TCONS_00123097	102175622	SYNE3	protein_coding	Novel_lncRNA	Chr 21	59691958	59700829	-	2	334	45
TCONS_00123098	XLOC_077746	XLOC_077746	novel	Novel_lncRNA	Chr 21	59722500	59724484	-	3	571	108
TCONS_00123279	XLOC_077847	XLOC_077847	novel	Novel_lncRNA	Chr 21	66240134	66245023	-	2	1923	177
TCONS_00123327	106503952	TNFAIP2	protein_coding	Novel_lncRNA	Chr 21	67056251	67123560	-	2	345	84
TCONS_00123328	XLOC_077869	XLOC_077869	novel	Novel_lncRNA	Chr 21	67057148	67064002	-	2	596	193
TCONS_00123370	102172847	MARK3	protein_coding	Novel_lncRNA	Chr 21	67320566	67336480	-	3	750	136
TCONS_00123425	XLOC_077933	XLOC_077933	novel	Novel_lncRNA	Chr 21	68461683	68462446	-	2	594	198
TCONS_00123432	XLOC_077939	XLOC_077939	novel	Novel_lncRNA	Chr 21	68505960	68506283	-	2	212	66
TCONS_00123434	XLOC_077941	XLOC_077941	novel	Novel_lncRNA	Chr 21	68513158	68516103	-	5	808	218
TCONS_00123447	102185402	LOC102185402	protein_coding	Novel_lncRNA	Chr 21	68595377	68597413	-	2	1613	320
TCONS_00123551	102170096	DBNL	protein_coding	Novel_lncRNA	Chr 22	288082	297014	+	4	1684	274
TCONS_00123575	102172767	EGFR	protein_coding	Novel_lncRNA	Chr 22	790725	815493	+	2	546	108
TCONS_00123600	102168495	ZCWPW2	protein_coding	Novel_lncRNA	Chr 22	2666866	2707608	+	8	7395	426
TCONS_00123698	XLOC_078100	XLOC_078100	novel	Novel_lncRNA	Chr 22	6717212	6718172	+	2	624	107
TCONS_00123730	102172395	FBXL2	protein_coding	Novel_lncRNA	Chr 22	7471140	7492689	+	2	487	58
TCONS_00123802	102180895	LRRFIP2	protein_coding	Novel_lncRNA	Chr 22	10234142	10274359	+	3	554	106
TCONS_00123836	102182638	TRANK1	protein_coding	Novel_lncRNA	Chr 22	10468418	10491113	+	3	810	159
TCONS_00123840	XLOC_078162	XLOC_078162	novel	Novel_lncRNA	Chr 22	10568494	10569259	+	2	240	80
TCONS_00124076	XLOC_078285	XLOC_078285	novel	Novel_lncRNA	Chr 22	14956436	14958269	+	2	1061	137
TCONS_00124078	XLOC_078286	XLOC_078286	novel	Novel_lncRNA	Chr 22	14958736	14959866	+	2	957	122
TCONS_00124134	XLOC_078305	XLOC_078305	novel	Novel_lncRNA	Chr 22	15545129	15546279	+	2	251	69
TCONS_00124245	XLOC_078362	XLOC_078362	novel	Novel_lncRNA	Chr 22	17030866	17047568	+	2	8916	279
TCONS_00124280	102184850	SRGAP3	protein_coding	Novel_lncRNA	Chr 22	17273193	17280057	+	3	214	49
TCONS_00124335	102188092	ITPR1	protein_coding	Novel_lncRNA	Chr 22	21412175	21417236	+	2	2941	177
TCONS_00124412	XLOC_078496	XLOC_078496	novel	Novel_lncRNA	Chr 22	28335123	28340878	+	2	5610	150
TCONS_00124458	XLOC_078532	XLOC_078532	novel	Novel_lncRNA	Chr 22	29914937	29918000	+	2	1947	97
TCONS_00124576	102178670	MAGI1	protein_coding	Novel_lncRNA	Chr 22	35927039	35930476	+	2	1695	89
TCONS_00124812	102175812	TKT	protein_coding	Novel_lncRNA	Chr 22	47621855	47631177	+	2	901	97
TCONS_00124814	XLOC_078690	XLOC_078690	novel	Novel_lncRNA	Chr 22	47647952	47648722	+	2	317	81
TCONS_00124841	108638635	MUSTN1	protein_coding	Novel_lncRNA	Chr 22	47965082	47966999	+	3	1693	198
TCONS_00124952	XLOC_078759	XLOC_078759	novel	Novel_lncRNA	Chr 22	49025645	49027112	+	2	690	110
TCONS_00125066	102174785	SEMA3F	protein_coding	Novel_lncRNA	Chr 22	50260808	50271242	+	3	806	249
TCONS_00125111	102178403	DAG1	protein_coding	Novel_lncRNA	Chr 22	50711418	50738359	+	2	662	125
TCONS_00125183	108638605	ARIH2OS	protein_coding	Novel_lncRNA	Chr 22	51081503	51112216	+	9	3546	243
TCONS_00125221	102188810	PFKFB4	protein_coding	Novel_lncRNA	Chr 22	51421049	51425925	+	3	3966	245
TCONS_00125227	102190001	SHISA5	protein_coding	Novel_lncRNA	Chr 22	51452776	51456011	+	3	1418	273
TCONS_00125246	102181171	PLXNB1	protein_coding	Novel_lncRNA	Chr 22	51493739	51497936	+	2	619	121
TCONS_00125353	106503427	LOC106503427	protein_coding	Novel_lncRNA	Chr 22	52847426	52864477	+	2	6188	155
TCONS_00125359	106503427	LOC106503427	protein_coding	Novel_lncRNA	Chr 22	52863976	52876258	+	3	772	145
TCONS_00125463	102182923	ZDHHC3	protein_coding	Novel_lncRNA	Chr 22	54241971	54254978	+	3	1955	122
TCONS_00125481	XLOC_079049	XLOC_079049	novel	Novel_lncRNA	Chr 22	55104701	55108820	+	2	216	51
TCONS_00125530	108638638	TMCC1	protein_coding	Novel_lncRNA	Chr 22	55929449	55993593	+	6	6096	149
TCONS_00125576	XLOC_079102	XLOC_079102	novel	Novel_lncRNA	Chr 22	56425129	56426880	+	2	611	77
TCONS_00125617	108633353	RBSN	protein_coding	Novel_lncRNA	Chr 22	57147839	57153817	+	3	2609	133
TCONS_00125650	XLOC_079142	XLOC_079142	novel	Novel_lncRNA	Chr 22	57826571	57827359	+	3	272	90
TCONS_00125652	XLOC_079144	XLOC_079144	novel	Novel_lncRNA	Chr 22	57838552	57844193	+	2	958	116
TCONS_00125668	XLOC_079151	XLOC_079151	novel	Novel_lncRNA	Chr 22	58070706	58072253	+	2	933	136
TCONS_00125733	XLOC_079194	XLOC_079194	novel	Novel_lncRNA	Chr 22	59161629	59164792	+	2	2012	164
TCONS_00125739	XLOC_079198	XLOC_079198	novel	Novel_lncRNA	Chr 22	59252878	59255073	+	2	2096	229
TCONS_00125754	102169812	KBTBD12	protein_coding	Novel_lncRNA	Chr 22	59518976	59531532	+	2	416	118
TCONS_00125755	102169812	KBTBD12	protein_coding	Novel_lncRNA	Chr 22	59523600	59531532	+	2	1356	160
TCONS_00125756	XLOC_079208	XLOC_079208	novel	Novel_lncRNA	Chr 22	59531988	59588907	+	2	497	56
TCONS_00125760	XLOC_079211	XLOC_079211	novel	Novel_lncRNA	Chr 22	59619460	59621810	+	2	1452	131
TCONS_00125808	102178864	SLC41A3	protein_coding	Novel_lncRNA	Chr 22	60146693	60149708	+	2	1076	177
TCONS_00125919	XLOC_079285	XLOC_079285	novel	Novel_lncRNA	Chr 22	3763361	3763956	-	2	383	79
TCONS_00125932	XLOC_079295	XLOC_079295	novel	Novel_lncRNA	Chr 22	4657843	4780030	-	3	433	113
TCONS_00125943	XLOC_079295	XLOC_079295	novel	Novel_lncRNA	Chr 22	4771620	4773733	-	2	732	74
TCONS_00125944	XLOC_079295	XLOC_079295	novel	Novel_lncRNA	Chr 22	4771620	4780030	-	2	664	96
TCONS_00125945	XLOC_079295	XLOC_079295	novel	Novel_lncRNA	Chr 22	4773149	4779960	-	2	696	111
TCONS_00126109	102182351	EPM2AIP1	protein_coding	Novel_lncRNA	Chr 22	10428230	10434571	-	2	2824	658
TCONS_00126140	102176275	ACVR2B	protein_coding	Novel_lncRNA	Chr 22	11696733	11700622	-	2	732	94
TCONS_00126144	102185510	EXOG	protein_coding	Novel_lncRNA	Chr 22	11761833	11821437	-	2	274	90
TCONS_00126158	XLOC_079430	XLOC_079430	novel	Novel_lncRNA	Chr 22	12227728	12230834	-	3	427	75
TCONS_00126170	102186348	CSRNP1	protein_coding	Novel_lncRNA	Chr 22	12339889	12350404	-	2	9361	192
TCONS_00126228	XLOC_079468	XLOC_079468	novel	Novel_lncRNA	Chr 22	14247579	14252475	-	2	701	199
TCONS_00126253	102179893	ZBTB47	protein_coding	Novel_lncRNA	Chr 22	14632591	14634908	-	2	321	106
TCONS_00126288	102171932	CCDC13	protein_coding	Novel_lncRNA	Chr 22	14703774	14707097	-	3	1092	100
TCONS_00126347	102177570	LOC102177570	protein_coding	Novel_lncRNA	Chr 22	16224025	16235272	-	2	1544	375
TCONS_00126352	XLOC_079525	XLOC_079525	novel	Novel_lncRNA	Chr 22	16285281	16286140	-	3	398	121
TCONS_00126375	102183189	PRRT3	protein_coding	Novel_lncRNA	Chr 22	16640893	16641784	-	2	240	80
TCONS_00126464	XLOC_079562	XLOC_079562	novel	Novel_lncRNA	Chr 22	17030862	17046103	-	4	4036	284
TCONS_00126465	XLOC_079562	XLOC_079562	novel	Novel_lncRNA	Chr 22	17030862	17047570	-	3	5272	284
TCONS_00126471	XLOC_079566	XLOC_079566	novel	Novel_lncRNA	Chr 22	17117692	17130802	-	2	513	66
TCONS_00126606	XLOC_079662	XLOC_079662	novel	Novel_lncRNA	Chr 22	27741193	27785571	-	2	230	76
TCONS_00126628	102169917	GXYLT2	protein_coding	Novel_lncRNA	Chr 22	28677050	28684113	-	2	5383	129
TCONS_00126668	102171383	FOXP1	protein_coding	Novel_lncRNA	Chr 22	30600703	30604521	-	3	3234	124
TCONS_00126740	XLOC_079761	XLOC_079761	novel	Novel_lncRNA	Chr 22	34646606	34652137	-	3	337	85
TCONS_00126755	XLOC_079768	XLOC_079768	novel	Novel_lncRNA	Chr 22	35371662	35373477	-	2	566	82
TCONS_00126756	102178670	MAGI1	protein_coding	Novel_lncRNA	Chr 22	35374347	35648431	-	2	921	143
TCONS_00126847	102169530	PTPRG	protein_coding	Novel_lncRNA	Chr 22	39518551	39693957	-	4	61868	186
TCONS_00126848	102169530	PTPRG	protein_coding	Novel_lncRNA	Chr 22	39548231	39783533	-	3	33330	186
TCONS_00126996	102175812	TKT	protein_coding	Novel_lncRNA	Chr 22	47644352	47648826	-	3	1009	186
TCONS_00126997	XLOC_079894	XLOC_079894	novel	Novel_lncRNA	Chr 22	47645977	47648852	-	3	1440	145
TCONS_00126998	XLOC_079894	XLOC_079894	novel	Novel_lncRNA	Chr 22	47647177	47648776	-	3	508	82
TCONS_00127042	102181547	SMIM4	protein_coding	Novel_lncRNA	Chr 22	48183646	48194125	-	3	442	122
TCONS_00127046	102181547	SMIM4	protein_coding	Novel_lncRNA	Chr 22	48188575	48194125	-	2	2711	178
TCONS_00127059	XLOC_079926	XLOC_079926	novel	Novel_lncRNA	Chr 22	48530432	48531152	-	2	427	123
TCONS_00127060	XLOC_079926	XLOC_079926	novel	Novel_lncRNA	Chr 22	48530432	48531186	-	2	458	133
TCONS_00127299	102180898	TCTA	protein_coding	Novel_lncRNA	Chr 22	50768429	50775612	-	9	4592	441
TCONS_00127309	102181729	CCDC36	protein_coding	Novel_lncRNA	Chr 22	50895437	50915986	-	8	1378	209
TCONS_00127330	102186064	DALRD3	protein_coding	Novel_lncRNA	Chr 22	51043100	51045086	-	2	1758	167
TCONS_00127377	XLOC_080095	XLOC_080095	novel	Novel_lncRNA	Chr 22	51615560	51616706	-	2	503	92
TCONS_00127392	XLOC_080109	XLOC_080109	novel	Novel_lncRNA	Chr 22	51799715	51801418	-	2	973	89
TCONS_00127415	102172213	DHX30	protein_coding	Novel_lncRNA	Chr 22	51972957	51985045	-	7	1992	107
TCONS_00127416	102172213	DHX30	protein_coding	Novel_lncRNA	Chr 22	51972957	51985690	-	6	2013	122
TCONS_00127417	102172213	DHX30	protein_coding	Novel_lncRNA	Chr 22	51972957	51985690	-	7	2122	127
TCONS_00127418	102172213	DHX30	protein_coding	Novel_lncRNA	Chr 22	51972957	51985690	-	6	1926	111
TCONS_00127419	102172213	DHX30	protein_coding	Novel_lncRNA	Chr 22	51972957	51985690	-	5	3772	283
TCONS_00127567	102183923	TMEM42	protein_coding	Novel_lncRNA	Chr 22	54275522	54279016	-	3	1456	289
TCONS_00127568	102183923	TMEM42	protein_coding	Novel_lncRNA	Chr 22	54275522	54279016	-	4	1226	246
TCONS_00127582	108633284	HRH1	protein_coding	Novel_lncRNA	Chr 22	55277837	55280639	-	2	461	134
TCONS_00127587	102185791	ATG7	protein_coding	Novel_lncRNA	Chr 22	55531882	55563709	-	2	892	237
TCONS_00127596	108638624	VGLL4	protein_coding	Novel_lncRNA	Chr 22	55579516	55581607	-	2	884	127
TCONS_00127598	108638624	VGLL4	protein_coding	Novel_lncRNA	Chr 22	55634996	55636504	-	2	688	151
TCONS_00127617	XLOC_080216	XLOC_080216	novel	Novel_lncRNA	Chr 22	56105875	56108399	-	2	282	94
TCONS_00127636	XLOC_080227	XLOC_080227	novel	Novel_lncRNA	Chr 22	56408837	56416311	-	2	472	90
TCONS_00127639	XLOC_080230	XLOC_080230	novel	Novel_lncRNA	Chr 22	56420715	56421993	-	2	546	128
TCONS_00127640	XLOC_080231	XLOC_080231	novel	Novel_lncRNA	Chr 22	56421530	56423416	-	2	817	116
TCONS_00127641	XLOC_080231	XLOC_080231	novel	Novel_lncRNA	Chr 22	56421530	56426875	-	2	260	86
TCONS_00127642	XLOC_080231	XLOC_080231	novel	Novel_lncRNA	Chr 22	56423516	56426891	-	2	2235	100
TCONS_00127697	XLOC_080251	XLOC_080251	novel	Novel_lncRNA	Chr 22	57341568	57348484	-	2	492	105
TCONS_00127723	102190828	LSM3	protein_coding	Novel_lncRNA	Chr 22	57881604	57949809	-	2	1263	133
TCONS_00127726	102190828	LSM3	protein_coding	Novel_lncRNA	Chr 22	57922791	57949809	-	2	1241	133
TCONS_00127772	102172773	IQSEC1	protein_coding	Novel_lncRNA	Chr 22	58804691	58812990	-	2	767	180
TCONS_00127807	XLOC_080325	XLOC_080325	novel	Novel_lncRNA	Chr 22	59214074	59254943	-	2	1275	240
TCONS_00127842	XLOC_080343	XLOC_080343	novel	Novel_lncRNA	Chr 22	59616960	59621946	-	2	276	91
TCONS_00127864	XLOC_080359	XLOC_080359	novel	Novel_lncRNA	Chr 22	59885232	59885799	-	2	443	120
TCONS_00127875	102178022	UROC1	protein_coding	Novel_lncRNA	Chr 22	60086963	60094676	-	3	943	271
TCONS_00127923	XLOC_080399	XLOC_080399	novel	Novel_lncRNA	Chr 23	208373	211566	+	2	594	151
TCONS_00127976	102180906	LOC102180906	protein_coding	Novel_lncRNA	Chr 23	1606425	1632089	+	2	1499	322
TCONS_00127977	102180906	LOC102180906	protein_coding	Novel_lncRNA	Chr 23	1606428	1612961	+	2	5128	322
TCONS_00127982	102168958	LY86	protein_coding	Novel_lncRNA	Chr 23	1841319	1862575	+	2	560	114
TCONS_00127986	XLOC_080442	XLOC_080442	novel	Novel_lncRNA	Chr 23	1919794	1925414	+	2	694	126
TCONS_00127987	XLOC_080442	XLOC_080442	novel	Novel_lncRNA	Chr 23	1919847	1925414	+	2	644	127
TCONS_00128127	106503514	GFOD1	protein_coding	Novel_lncRNA	Chr 23	7239424	7242781	+	2	1020	257
TCONS_00128156	XLOC_080553	XLOC_080553	novel	Novel_lncRNA	Chr 23	8192979	8199706	+	2	5950	173
TCONS_00128159	102184681	JARID2	protein_coding	Novel_lncRNA	Chr 23	8587970	8652258	+	2	688	106
TCONS_00128264	108633532	ID4	protein_coding	Novel_lncRNA	Chr 23	12265076	12266816	+	3	984	245
TCONS_00128295	XLOC_080633	XLOC_080633	novel	Novel_lncRNA	Chr 23	13896287	14078417	+	4	1533	97
TCONS_00128296	102168677	LOC102168677	protein_coding	Novel_lncRNA	Chr 23	13896287	14296270	+	6	7093	154
TCONS_00128297	XLOC_080633	XLOC_080633	novel	Novel_lncRNA	Chr 23	13896292	14078417	+	5	1657	99
TCONS_00128298	XLOC_080633	XLOC_080633	novel	Novel_lncRNA	Chr 23	13896292	14078417	+	6	1746	96
TCONS_00128299	102168677	LOC102168677	protein_coding	Novel_lncRNA	Chr 23	13896302	14296270	+	6	6952	154
TCONS_00128300	XLOC_080633	XLOC_080633	novel	Novel_lncRNA	Chr 23	13896310	13969095	+	3	641	96
TCONS_00128356	102168677	LOC102168677	protein_coding	Novel_lncRNA	Chr 23	14172526	14296270	+	4	6807	154
TCONS_00128511	XLOC_080783	XLOC_080783	novel	Novel_lncRNA	Chr 23	16878818	16880010	+	2	486	71
TCONS_00128517	100860987	GMNN	protein_coding	Novel_lncRNA	Chr 23	16951733	16956080	+	3	1056	95
TCONS_00128615	XLOC_080842	XLOC_080842	novel	Novel_lncRNA	Chr 23	18398752	18400988	+	2	212	60
TCONS_00128712	102179758	LOC102179758	protein_coding	Novel_lncRNA	Chr 23	18949595	18993797	+	2	437	133
TCONS_00128713	102180307	LOC102180307	protein_coding	Novel_lncRNA	Chr 23	18949596	18969360	+	2	437	145
TCONS_00128863	102172138	LOC102172138	protein_coding	Novel_lncRNA	Chr 23	20902092	20927263	+	2	886	117
TCONS_00128864	102172138	LOC102172138	protein_coding	Novel_lncRNA	Chr 23	20902929	20928335	+	2	1123	131
TCONS_00128866	102172138	LOC102172138	protein_coding	Novel_lncRNA	Chr 23	20904250	20928999	+	2	455	140
TCONS_00128869	102172138	LOC102172138	protein_coding	Novel_lncRNA	Chr 23	20907361	20933939	+	2	310	102
TCONS_00129006	102170313	LOC102170313	protein_coding	Novel_lncRNA	Chr 23	21925842	22159269	+	3	417	139
TCONS_00129008	102169753	LOC102169753	protein_coding	Novel_lncRNA	Chr 23	22008739	22009220	+	2	213	70
TCONS_00129009	102170313	LOC102170313	protein_coding	Novel_lncRNA	Chr 23	22012342	22157223	+	2	358	118
TCONS_00129010	102170313	LOC102170313	protein_coding	Novel_lncRNA	Chr 23	22013413	22159269	+	2	797	146
TCONS_00129016	102170313	LOC102170313	protein_coding	Novel_lncRNA	Chr 23	22106844	22174511	+	3	317	105
TCONS_00129018	102185917	LOC102185917	protein_coding	Novel_lncRNA	Chr 23	22128330	22149471	+	2	249	54
TCONS_00129019	102185917	LOC102185917	protein_coding	Novel_lncRNA	Chr 23	22131154	22152266	+	2	567	110
TCONS_00129021	102185917	LOC102185917	protein_coding	Novel_lncRNA	Chr 23	22132920	22153771	+	2	317	54
TCONS_00129022	102185917	LOC102185917	protein_coding	Novel_lncRNA	Chr 23	22132920	22153904	+	2	434	60
TCONS_00129025	102185917	LOC102185917	protein_coding	Novel_lncRNA	Chr 23	22149137	22159269	+	2	1430	146
TCONS_00129030	102187820	MCCD1	protein_coding	Novel_lncRNA	Chr 23	22204300	22217154	+	11	5033	354
TCONS_00129208	100860813	LOC100860813	protein_coding	Novel_lncRNA	Chr 23	23531805	23588428	+	2	338	97
TCONS_00129247	XLOC_081207	XLOC_081207	novel	Novel_lncRNA	Chr 23	24038797	24040009	+	2	343	68
TCONS_00129257	XLOC_081213	XLOC_081213	novel	Novel_lncRNA	Chr 23	24380759	24382603	+	3	804	115
TCONS_00129588	102175537	C23H6orf132	protein_coding	Novel_lncRNA	Chr 23	32920040	32939658	+	2	1059	293
TCONS_00129631	102188365	LOC102188365	protein_coding	Novel_lncRNA	Chr 23	33771586	33772185	+	2	217	72
TCONS_00129690	102185229	DNAH8	protein_coding	Novel_lncRNA	Chr 23	36108383	36109879	+	2	223	48
TCONS_00129701	102184675	BTBD9	protein_coding	Novel_lncRNA	Chr 23	36740426	37055674	+	6	4072	396
TCONS_00129746	XLOC_081547	XLOC_081547	novel	Novel_lncRNA	Chr 23	37797622	37798612	+	2	326	108
TCONS_00129753	XLOC_081554	XLOC_081554	novel	Novel_lncRNA	Chr 23	37847791	37849585	+	2	498	93
TCONS_00129754	XLOC_081554	XLOC_081554	novel	Novel_lncRNA	Chr 23	37847809	37849585	+	2	977	94
TCONS_00129797	102181172	STK38	protein_coding	Novel_lncRNA	Chr 23	38276538	38294951	+	3	826	167
TCONS_00129833	XLOC_081605	XLOC_081605	novel	Novel_lncRNA	Chr 23	38992558	38998749	+	3	838	124
TCONS_00129853	102188097	TEAD3	protein_coding	Novel_lncRNA	Chr 23	39260619	39266647	+	2	769	189
TCONS_00129966	102185047	IP6K3	protein_coding	Novel_lncRNA	Chr 23	40811956	40817062	+	2	2385	135
TCONS_00130057	106503476	BRD2	protein_coding	Novel_lncRNA	Chr 23	41402608	41410429	+	2	321	78
TCONS_00130090	102179820	KLHL31	protein_coding	Novel_lncRNA	Chr 23	41831759	41836547	+	2	4433	171
TCONS_00130106	102184854	MLIP	protein_coding	Novel_lncRNA	Chr 23	42133047	42264167	+	3	3400	208
TCONS_00130116	102184854	MLIP	protein_coding	Novel_lncRNA	Chr 23	42170447	42298654	+	2	7534	136
TCONS_00130148	102178959	HMGCLL1	protein_coding	Novel_lncRNA	Chr 23	43858488	43880923	+	2	666	65
TCONS_00130168	102182356	BEND6	protein_coding	Novel_lncRNA	Chr 23	45452178	45472880	+	3	621	171
TCONS_00130202	XLOC_081793	XLOC_081793	novel	Novel_lncRNA	Chr 23	45744482	45745156	+	2	259	86
TCONS_00130225	XLOC_081814	XLOC_081814	novel	Novel_lncRNA	Chr 23	71967	72441	-	2	440	74
TCONS_00130278	XLOC_081856	XLOC_081856	novel	Novel_lncRNA	Chr 23	1407471	1407956	-	2	204	68
TCONS_00130284	102181454	MYLK4	protein_coding	Novel_lncRNA	Chr 23	1490255	1493167	-	2	1944	165
TCONS_00130313	XLOC_081875	XLOC_081875	novel	Novel_lncRNA	Chr 23	1770312	1777045	-	2	324	92
TCONS_00130326	XLOC_081888	XLOC_081888	novel	Novel_lncRNA	Chr 23	1905476	1922160	-	2	674	140
TCONS_00130332	XLOC_081894	XLOC_081894	novel	Novel_lncRNA	Chr 23	1920085	1925608	-	2	597	89
TCONS_00130336	XLOC_081897	XLOC_081897	novel	Novel_lncRNA	Chr 23	1925766	1927539	-	2	1574	133
TCONS_00130356	XLOC_081917	XLOC_081917	novel	Novel_lncRNA	Chr 23	2030107	2078604	-	3	243	81
TCONS_00130448	102178780	C23H6orf52	protein_coding	Novel_lncRNA	Chr 23	4908429	4911186	-	4	1438	177
TCONS_00130450	102178780	C23H6orf52	protein_coding	Novel_lncRNA	Chr 23	4908429	4918383	-	7	2030	199
TCONS_00130471	102188001	NEDD9	protein_coding	Novel_lncRNA	Chr 23	5260811	5268281	-	2	7074	167
TCONS_00130516	102187727	TMEM170B	protein_coding	Novel_lncRNA	Chr 23	5517149	5518765	-	2	843	279
TCONS_00130598	XLOC_082083	XLOC_082083	novel	Novel_lncRNA	Chr 23	8234419	8235878	-	2	1364	111
TCONS_00130657	102183556	RBM24	protein_coding	Novel_lncRNA	Chr 23	10308071	10314152	-	2	5213	183
TCONS_00130658	XLOC_082138	XLOC_082138	novel	Novel_lncRNA	Chr 23	10317509	10317875	-	2	303	55
TCONS_00130678	102171675	KIF13A	protein_coding	Novel_lncRNA	Chr 23	10780459	10838316	-	3	1771	265
TCONS_00130679	102171675	KIF13A	protein_coding	Novel_lncRNA	Chr 23	10811367	10837695	-	3	2201	178
TCONS_00130680	102171675	KIF13A	protein_coding	Novel_lncRNA	Chr 23	10834522	10837696	-	2	2883	135
TCONS_00130696	102169816	RNF144B	protein_coding	Novel_lncRNA	Chr 23	11022263	11068505	-	2	710	119
TCONS_00130745	XLOC_082193	XLOC_082193	novel	Novel_lncRNA	Chr 23	13896291	13898408	-	2	446	96
TCONS_00130761	102174613	LOC102174613	protein_coding	Novel_lncRNA	Chr 23	15011640	15037331	-	2	247	73
TCONS_00130765	XLOC_082208	XLOC_082208	novel	Novel_lncRNA	Chr 23	15064643	15065402	-	2	605	99
TCONS_00130794	XLOC_082223	XLOC_082223	novel	Novel_lncRNA	Chr 23	15434037	15436160	-	2	1338	139
TCONS_00130796	102177852	PXDC1	protein_coding	Novel_lncRNA	Chr 23	15437191	15456585	-	4	7241	399
TCONS_00130824	XLOC_082240	XLOC_082240	novel	Novel_lncRNA	Chr 23	15662591	15665433	-	2	396	81
TCONS_00130935	102185049	LOC102185049	protein_coding	Novel_lncRNA	Chr 23	18154989	18165342	-	2	1011	149
TCONS_00130936	102185049	LOC102185049	protein_coding	Novel_lncRNA	Chr 23	18154989	18165436	-	2	1772	149
TCONS_00130944	102183743	LOC102183743	protein_coding	Novel_lncRNA	Chr 23	18187700	18279963	-	2	872	149
TCONS_00130947	102183743	LOC102183743	protein_coding	Novel_lncRNA	Chr 23	18204000	18267285	-	2	776	153
TCONS_00130988	102179149	LOC102179149	protein_coding	Novel_lncRNA	Chr 23	18405418	18412811	-	2	212	67
TCONS_00131100	100860985	ZKSCAN8	protein_coding	Novel_lncRNA	Chr 23	19417453	19420486	-	2	241	63
TCONS_00131201	106504020	LOC106504020	protein_coding	Novel_lncRNA	Chr 23	20889059	20896336	-	3	385	128
TCONS_00131202	102172138	LOC102172138	protein_coding	Novel_lncRNA	Chr 23	20900482	20927546	-	2	2780	115
TCONS_00131208	102172138	LOC102172138	protein_coding	Novel_lncRNA	Chr 23	20901946	20926474	-	2	244	77
TCONS_00131209	102172138	LOC102172138	protein_coding	Novel_lncRNA	Chr 23	20901946	20927268	-	2	1037	142
TCONS_00131210	102172138	LOC102172138	protein_coding	Novel_lncRNA	Chr 23	20901946	20927546	-	2	1316	98
TCONS_00131217	102180584	LOC102180584	protein_coding	Novel_lncRNA	Chr 23	20919722	20941343	-	2	313	64
TCONS_00131381	102185917	LOC102185917	protein_coding	Novel_lncRNA	Chr 23	22128334	22149476	-	2	250	56
TCONS_00131382	102185917	LOC102185917	protein_coding	Novel_lncRNA	Chr 23	22131214	22152266	-	2	507	95
TCONS_00131383	102185917	LOC102185917	protein_coding	Novel_lncRNA	Chr 23	22132057	22153013	-	2	410	63
TCONS_00131384	102185917	LOC102185917	protein_coding	Novel_lncRNA	Chr 23	22132057	22153773	-	2	1182	88
TCONS_00131385	102185917	LOC102185917	protein_coding	Novel_lncRNA	Chr 23	22132057	22154209	-	2	1600	105
TCONS_00131393	102171392	LOC102171392	protein_coding	Novel_lncRNA	Chr 23	22141096	22148694	-	4	1046	123
TCONS_00131595	102180664	LOC102180664	protein_coding	Novel_lncRNA	Chr 23	23514637	23568047	-	5	774	228
TCONS_00131618	102186915	FBXO9	protein_coding	Novel_lncRNA	Chr 23	23854428	23935111	-	2	244	66
TCONS_00131625	XLOC_082705	XLOC_082705	novel	Novel_lncRNA	Chr 23	23932816	23935111	-	2	347	75
TCONS_00131629	102174444	LOC102174444	protein_coding	Novel_lncRNA	Chr 23	24017143	24081069	-	2	408	77
TCONS_00131631	XLOC_082716	XLOC_082716	novel	Novel_lncRNA	Chr 23	24038857	24040009	-	2	283	68
TCONS_00131694	102188988	LOC102188988	protein_coding	Novel_lncRNA	Chr 23	27782474	27783026	-	2	211	70
TCONS_00131716	102185129	ADGRF5	protein_coding	Novel_lncRNA	Chr 23	28709531	28732132	-	2	305	85
TCONS_00131725	102184567	ANKRD66	protein_coding	Novel_lncRNA	Chr 23	28920204	28922279	-	2	963	114
TCONS_00131726	102184567	ANKRD66	protein_coding	Novel_lncRNA	Chr 23	28921711	28934600	-	2	559	124
TCONS_00131727	102184567	ANKRD66	protein_coding	Novel_lncRNA	Chr 23	28921711	28954800	-	11	1839	328
TCONS_00131728	102184567	ANKRD66	protein_coding	Novel_lncRNA	Chr 23	28921711	28954850	-	11	1742	462
TCONS_00131756	102183278	RUNX2	protein_coding	Novel_lncRNA	Chr 23	30224152	30544634	-	11	1495	396
TCONS_00131981	102175815	LOC102175815	protein_coding	Novel_lncRNA	Chr 23	32923446	32939309	-	2	312	103
TCONS_00132082	XLOC_082963	XLOC_082963	novel	Novel_lncRNA	Chr 23	37055824	37056342	-	2	276	85
TCONS_00132100	102183114	TBC1D22B	protein_coding	Novel_lncRNA	Chr 23	37555669	37560452	-	2	4111	152
TCONS_00132214	102176475	ARMC12	protein_coding	Novel_lncRNA	Chr 23	38975339	38988117	-	2	12146	256
TCONS_00132216	102176475	ARMC12	protein_coding	Novel_lncRNA	Chr 23	38975339	38988117	-	4	11192	180
TCONS_00132218	102176475	ARMC12	protein_coding	Novel_lncRNA	Chr 23	38975339	38988743	-	2	13013	287
TCONS_00132219	102176475	ARMC12	protein_coding	Novel_lncRNA	Chr 23	38975339	38988802	-	3	9874	287
TCONS_00132220	XLOC_083047	XLOC_083047	novel	Novel_lncRNA	Chr 23	38990465	38992951	-	2	1560	166
TCONS_00132222	XLOC_083047	XLOC_083047	novel	Novel_lncRNA	Chr 23	38990465	38994343	-	3	2813	218
TCONS_00132224	102175447	FKBP5	protein_coding	Novel_lncRNA	Chr 23	39022240	39023381	-	2	756	251
TCONS_00132255	102174254	ZNF76	protein_coding	Novel_lncRNA	Chr 23	39452563	39470612	-	3	2026	118
TCONS_00132257	102187010	SCUBE3	protein_coding	Novel_lncRNA	Chr 23	39478600	39573979	-	3	252	64
TCONS_00132323	102171667	HMGA1	protein_coding	Novel_lncRNA	Chr 23	40363291	40371194	-	4	4220	305
TCONS_00132326	102171667	HMGA1	protein_coding	Novel_lncRNA	Chr 23	40363291	40374210	-	5	4121	253
TCONS_00132327	102171667	HMGA1	protein_coding	Novel_lncRNA	Chr 23	40363291	40374210	-	5	4122	348
TCONS_00132328	102171667	HMGA1	protein_coding	Novel_lncRNA	Chr 23	40363291	40374210	-	5	4124	254
TCONS_00132329	102171667	HMGA1	protein_coding	Novel_lncRNA	Chr 23	40363291	40374210	-	6	3868	295
TCONS_00132348	102185047	IP6K3	protein_coding	Novel_lncRNA	Chr 23	40811968	40819533	-	2	325	108
TCONS_00132486	102184854	MLIP	protein_coding	Novel_lncRNA	Chr 23	42156617	42160593	-	3	2938	179
TCONS_00132518	XLOC_083208	XLOC_083208	novel	Novel_lncRNA	Chr 23	44690311	44696638	-	2	231	39
TCONS_00132594	102187638	PQLC1	protein_coding	Novel_lncRNA	Chr 24	424190	470599	+	2	504	96
TCONS_00132621	102188453	ATP9B	protein_coding	Novel_lncRNA	Chr 24	793936	809078	+	3	13894	188
TCONS_00132622	102188453	ATP9B	protein_coding	Novel_lncRNA	Chr 24	793936	809078	+	2	14512	188
TCONS_00132635	106503529	MBP	protein_coding	Novel_lncRNA	Chr 24	2261203	2272923	+	2	1041	123
TCONS_00132682	XLOC_083295	XLOC_083295	novel	Novel_lncRNA	Chr 24	4030630	4046041	+	2	1990	135
TCONS_00132685	XLOC_083298	XLOC_083298	novel	Novel_lncRNA	Chr 24	4087127	4094681	+	2	812	131
TCONS_00132737	XLOC_083336	XLOC_083336	novel	Novel_lncRNA	Chr 24	8663227	8691684	+	4	1561	130
TCONS_00132807	102183284	CELF4	protein_coding	Novel_lncRNA	Chr 24	20093362	20104950	+	3	2574	166
TCONS_00132848	XLOC_083403	XLOC_083403	novel	Novel_lncRNA	Chr 24	21769406	21769839	+	2	311	68
TCONS_00132942	XLOC_083468	XLOC_083468	novel	Novel_lncRNA	Chr 24	28111177	28126234	+	3	222	55
TCONS_00132964	XLOC_083482	XLOC_083482	novel	Novel_lncRNA	Chr 24	30929948	30932928	+	2	224	69
TCONS_00133007	102190835	LAMA3	protein_coding	Novel_lncRNA	Chr 24	33042971	33044550	+	2	229	56
TCONS_00133033	102191752	TMEM241	protein_coding	Novel_lncRNA	Chr 24	33560156	33609751	+	5	3566	124
TCONS_00133050	106503534	GATA6	protein_coding	Novel_lncRNA	Chr 24	34519618	34528029	+	2	437	145
TCONS_00133128	102173246	METTL4	protein_coding	Novel_lncRNA	Chr 24	37240864	37243194	+	2	526	170
TCONS_00133153	XLOC_083616	XLOC_083616	novel	Novel_lncRNA	Chr 24	37829566	37866329	+	3	228	60
TCONS_00133160	XLOC_083620	XLOC_083620	novel	Novel_lncRNA	Chr 24	37943128	37944622	+	3	219	44
TCONS_00133248	XLOC_083688	XLOC_083688	novel	Novel_lncRNA	Chr 24	41413924	41415621	+	2	207	68
TCONS_00133288	XLOC_083715	XLOC_083715	novel	Novel_lncRNA	Chr 24	41928997	41929316	+	2	222	72
TCONS_00133289	XLOC_083716	XLOC_083716	novel	Novel_lncRNA	Chr 24	41930095	41930459	+	2	230	76
TCONS_00133338	XLOC_083751	XLOC_083751	novel	Novel_lncRNA	Chr 24	43165046	43165829	+	2	679	221
TCONS_00133549	XLOC_083880	XLOC_083880	novel	Novel_lncRNA	Chr 24	52704419	52809889	+	2	230	76
TCONS_00133578	XLOC_083900	XLOC_083900	novel	Novel_lncRNA	Chr 24	54219941	54228304	+	5	4063	179
TCONS_00133579	XLOC_083900	XLOC_083900	novel	Novel_lncRNA	Chr 24	54220123	54228304	+	5	3838	179
TCONS_00133580	XLOC_083900	XLOC_083900	novel	Novel_lncRNA	Chr 24	54220636	54228304	+	3	3919	172
TCONS_00133598	XLOC_083913	XLOC_083913	novel	Novel_lncRNA	Chr 24	55638265	55640905	+	2	207	58
TCONS_00133651	102170194	NEDD4L	protein_coding	Novel_lncRNA	Chr 24	57365272	57366108	+	2	490	125
TCONS_00133674	102173250	ALPK2	protein_coding	Novel_lncRNA	Chr 24	57881435	57933236	+	5	5275	306
TCONS_00133730	102174894	LMAN1	protein_coding	Novel_lncRNA	Chr 24	58506559	58507568	+	2	297	98
TCONS_00133751	XLOC_084005	XLOC_084005	novel	Novel_lncRNA	Chr 24	60664177	60665457	+	2	982	104
TCONS_00133782	XLOC_084022	XLOC_084022	novel	Novel_lncRNA	Chr 24	61131576	61132083	+	3	415	84
TCONS_00133783	XLOC_084023	XLOC_084023	novel	Novel_lncRNA	Chr 24	61132526	61137575	+	2	4539	197
TCONS_00133907	106503529	MBP	protein_coding	Novel_lncRNA	Chr 24	2261108	2273717	-	2	1930	135
TCONS_00133908	106503529	MBP	protein_coding	Novel_lncRNA	Chr 24	2313740	2337433	-	2	3073	171
TCONS_00133953	XLOC_084133	XLOC_084133	novel	Novel_lncRNA	Chr 24	4030556	4037562	-	2	273	66
TCONS_00134011	102181645	TMX3	protein_coding	Novel_lncRNA	Chr 24	8583587	8663125	-	2	347	78
TCONS_00134147	102175174	LOC102175174	protein_coding	Novel_lncRNA	Chr 24	22067699	22087354	-	4	926	199
TCONS_00134267	102187178	PSMA8	protein_coding	Novel_lncRNA	Chr 24	31001719	31073873	-	11	3309	530
TCONS_00134268	102187178	PSMA8	protein_coding	Novel_lncRNA	Chr 24	31001719	31073873	-	10	3216	499
TCONS_00134269	102187178	PSMA8	protein_coding	Novel_lncRNA	Chr 24	31001719	31073873	-	11	3044	439
TCONS_00134370	102170746	LOC102170746	protein_coding	Novel_lncRNA	Chr 24	35340718	35405233	-	5	1560	232
TCONS_00134371	102170746	LOC102170746	protein_coding	Novel_lncRNA	Chr 24	35340718	35468058	-	33	6451	1372
TCONS_00134378	102168224	THOC1	protein_coding	Novel_lncRNA	Chr 24	35546491	35550746	-	3	1743	119
TCONS_00134416	102173246	METTL4	protein_coding	Novel_lncRNA	Chr 24	37243616	37244573	-	2	320	60
TCONS_00134616	XLOC_084561	XLOC_084561	novel	Novel_lncRNA	Chr 24	43532367	43533853	-	2	231	51
TCONS_00134640	XLOC_084577	XLOC_084577	novel	Novel_lncRNA	Chr 24	45576274	45578587	-	2	430	95
TCONS_00134641	XLOC_084577	XLOC_084577	novel	Novel_lncRNA	Chr 24	45576274	45582745	-	2	597	83
TCONS_00134718	XLOC_084626	XLOC_084626	novel	Novel_lncRNA	Chr 24	48409768	48424622	-	2	280	81
TCONS_00134756	102191574	LIPG	protein_coding	Novel_lncRNA	Chr 24	49400926	49423001	-	2	720	78
TCONS_00134767	XLOC_084658	XLOC_084658	novel	Novel_lncRNA	Chr 24	49570529	49596457	-	3	823	116
TCONS_00134773	102168225	MYO5B	protein_coding	Novel_lncRNA	Chr 24	49674117	49675113	-	2	421	72
TCONS_00134842	XLOC_084700	XLOC_084700	novel	Novel_lncRNA	Chr 24	54220813	54225310	-	3	748	172
TCONS_00134907	XLOC_084732	XLOC_084732	novel	Novel_lncRNA	Chr 24	57058824	57063356	-	2	1252	108
TCONS_00134943	102173250	ALPK2	protein_coding	Novel_lncRNA	Chr 24	57841339	57899119	-	2	3131	136
TCONS_00134997	XLOC_084789	XLOC_084789	novel	Novel_lncRNA	Chr 24	59900461	59900952	-	2	283	89
TCONS_00135003	XLOC_084795	XLOC_084795	novel	Novel_lncRNA	Chr 24	60275224	60290971	-	2	215	71
TCONS_00135024	102182652	KIAA1468	protein_coding	Novel_lncRNA	Chr 24	60777661	60779267	-	2	1009	197
TCONS_00135067	100861254	BCL2	protein_coding	Novel_lncRNA	Chr 24	61671179	61676851	-	3	642	105
TCONS_00135190	100861059	MCRIP2	protein_coding	Novel_lncRNA	Chr 25	484770	489780	+	2	1944	133
TCONS_00135285	102179533	C25H16orf91	protein_coding	Novel_lncRNA	Chr 25	1035148	1036200	+	2	716	161
TCONS_00135286	102179533	C25H16orf91	protein_coding	Novel_lncRNA	Chr 25	1035148	1036200	+	2	839	129
TCONS_00135343	102190511	EME2	protein_coding	Novel_lncRNA	Chr 25	1261493	1271719	+	13	5459	517
TCONS_00135348	102190511	EME2	protein_coding	Novel_lncRNA	Chr 25	1261501	1269133	+	9	5072	398
TCONS_00135349	102190511	EME2	protein_coding	Novel_lncRNA	Chr 25	1261501	1271719	+	12	4998	427
TCONS_00135420	102171752	CASKIN1	protein_coding	Novel_lncRNA	Chr 25	1623343	1626205	+	2	291	87
TCONS_00135512	XLOC_085025	XLOC_085025	novel	Novel_lncRNA	Chr 25	2042452	2046648	+	2	3664	170
TCONS_00135573	108633902	LOC108633902	protein_coding	Novel_lncRNA	Chr 25	2376977	2377753	+	2	527	135
TCONS_00135666	XLOC_085113	XLOC_085113	novel	Novel_lncRNA	Chr 25	2758635	2760014	+	2	452	67
TCONS_00135718	106501844	VASN	protein_coding	Novel_lncRNA	Chr 25	3436087	3481719	+	10	932	310
TCONS_00135796	102170574	RBFOX1	protein_coding	Novel_lncRNA	Chr 25	6140822	6184631	+	2	4059	115
TCONS_00135942	102176092	MKL2	protein_coding	Novel_lncRNA	Chr 25	12823394	12851795	+	2	593	197
TCONS_00135995	102172958	RRN3	protein_coding	Novel_lncRNA	Chr 25	13556708	13562666	+	4	422	123
TCONS_00136021	102177770	ABCC1	protein_coding	Novel_lncRNA	Chr 25	14181754	14195229	+	2	2764	143
TCONS_00136056	102174796	SMG1	protein_coding	Novel_lncRNA	Chr 25	16387898	16411917	+	2	2409	276
TCONS_00136125	100861062	LYRM1	protein_coding	Novel_lncRNA	Chr 25	18548906	18586977	+	3	884	76
TCONS_00136134	102188822	DNAH3	protein_coding	Novel_lncRNA	Chr 25	18587064	18589874	+	2	2225	104
TCONS_00136139	100861335	ANKS4B	protein_coding	Novel_lncRNA	Chr 25	18847150	18871594	+	2	5657	105
TCONS_00136164	XLOC_085402	XLOC_085402	novel	Novel_lncRNA	Chr 25	19901173	19908055	+	2	6816	150
TCONS_00136169	102168682	POLR3E	protein_coding	Novel_lncRNA	Chr 25	19934148	19940247	+	4	2300	181
TCONS_00136276	102176382	IL4R	protein_coding	Novel_lncRNA	Chr 25	24784672	24806255	+	3	941	130
TCONS_00136292	102177298	KIAA0556	protein_coding	Novel_lncRNA	Chr 25	25001088	25023833	+	3	272	74
TCONS_00136298	102177858	LOC102177858	protein_coding	Novel_lncRNA	Chr 25	25577763	25637765	+	7	2282	389
TCONS_00136316	102186925	NFATC2IP	protein_coding	Novel_lncRNA	Chr 25	25801673	25803302	+	2	464	154
TCONS_00136325	XLOC_085490	XLOC_085490	novel	Novel_lncRNA	Chr 25	25867565	25874814	+	3	468	135
TCONS_00136389	XLOC_085529	XLOC_085529	novel	Novel_lncRNA	Chr 25	26237844	26239206	+	2	239	79
TCONS_00136491	XLOC_085589	XLOC_085589	novel	Novel_lncRNA	Chr 25	26896132	26901068	+	2	2011	102
TCONS_00136557	102180100	ITGAM	protein_coding	Novel_lncRNA	Chr 25	27231064	27234633	+	3	2069	129
TCONS_00136600	102174355	LOC102174355	protein_coding	Novel_lncRNA	Chr 25	27771382	27780117	+	4	1329	167
TCONS_00136733	102180178	BCL7B	protein_coding	Novel_lncRNA	Chr 25	33469175	33473193	+	4	1920	175
TCONS_00136744	XLOC_085727	XLOC_085727	novel	Novel_lncRNA	Chr 25	33645442	33649410	+	2	529	73
TCONS_00136809	XLOC_085771	XLOC_085771	novel	Novel_lncRNA	Chr 25	35327766	35333105	+	2	937	165
TCONS_00136894	108633862	LOC108633862	protein_coding	Novel_lncRNA	Chr 25	36757464	36769992	+	4	4987	425
TCONS_00136895	108633862	LOC108633862	protein_coding	Novel_lncRNA	Chr 25	36757892	36769992	+	4	4604	440
TCONS_00136952	102183031	ZCWPW1	protein_coding	Novel_lncRNA	Chr 25	36987507	36997743	+	4	1483	134
TCONS_00136997	102168510	ZSCAN21	protein_coding	Novel_lncRNA	Chr 25	37292694	37293732	+	2	593	97
TCONS_00137011	102190090	LOC102190090	protein_coding	Novel_lncRNA	Chr 25	37718951	37726171	+	2	1372	354
TCONS_00137145	XLOC_085951	XLOC_085951	novel	Novel_lncRNA	Chr 25	39416670	39417480	+	2	339	112
TCONS_00137167	102176191	FBXL18	protein_coding	Novel_lncRNA	Chr 25	39689243	39695801	+	2	4317	232
TCONS_00137195	XLOC_085981	XLOC_085981	novel	Novel_lncRNA	Chr 25	40114278	40116278	+	2	742	110
[truncated: 1,443 more rows]
