# Supplementary material for: Identification and Characterization of lncRNAs Expression Profile Related to Goat Skeletal Muscle at Different Development Stages
Source: Animals (Basel). 2022 Oct 6;12(19):2683. doi: 10.3390/ani12192683 (PMC9558979; doi:10.3390/ani12192683)
Supplement: Supplementary file 1 [file animals-12-02683-s001.zip › Supplementary TableS3.xlsx]

## Sheet: Novel_mRNA_information
Table S3 List of mRNAs identified in the goat skeletal muscle libraries
Novel_mRNA_ID	Novel_mRNA_Gene_ID	Novel_mRNA_Gene_Name	Gene_Type	Status	Chromosome	Start	End	Strand	Exon_number	Length	ORF
TCONS_00092434	XLOC_058920	XLOC_058920	novel	Novel_mRNA	NC_030823.1	11312669	11340913	+	3	8243	311
TCONS_00092414	102169205	RGS1	protein_coding	Novel_mRNA	NC_030823.1	11202848	11340913	+	3	8313	311
TCONS_00094115	XLOC_060003	XLOC_060003	novel	Novel_mRNA	NC_030823.1	65082184	65167026	+	3	2411	212
TCONS_00054504	XLOC_034498	XLOC_034498	novel	Novel_mRNA	NC_030815.1	101344372	101347995	-	2	3463	208
TCONS_00066126	XLOC_042104	XLOC_042104	novel	Novel_mRNA	NC_030817.1	100669952	100821606	-	4	1045	255
TCONS_00121206	XLOC_076469	XLOC_076469	novel	Novel_mRNA	NC_030828.1	68511560	68526804	+	13	4901	395
TCONS_00102666	XLOC_065450	XLOC_065450	novel	Novel_mRNA	NC_030825.1	37182903	37186600	+	2	2434	366
TCONS_00057909	102170049	POPDC3	protein_coding	Novel_mRNA	NC_030816.1	32069884	32156906	-	3	25905	247
TCONS_00057908	102170049	POPDC3	protein_coding	Novel_mRNA	NC_030816.1	32069884	32156906	-	4	13059	247
TCONS_00067295	108637143	LOC108637143	misc_RNA	Novel_mRNA	NC_030818.1	37789368	37790545	+	2	1115	355
TCONS_00152149	XLOC_095165	XLOC_095165	novel	Novel_mRNA	NW_017189516.1	36329695	36433772	+	3	86363	464
TCONS_00124246	XLOC_078362	XLOC_078362	novel	Novel_mRNA	NC_030829.1	17030866	17047568	+	2	13340	284
TCONS_00121208	XLOC_076469	XLOC_076469	novel	Novel_mRNA	NC_030828.1	68513191	68526804	+	13	2331	406
TCONS_00124242	XLOC_078362	XLOC_078362	novel	Novel_mRNA	NC_030829.1	17030866	17047568	+	2	16382	284
TCONS_00124241	XLOC_078362	XLOC_078362	novel	Novel_mRNA	NC_030829.1	17030866	17047568	+	4	5497	284
TCONS_00161764	XLOC_102222	XLOC_102222	novel	Novel_mRNA	NW_017214446.1	5706	9175	+	2	2345	176
TCONS_00147254	102168802	RBM34	protein_coding	Novel_mRNA	NC_030835.1	37447451	37464255	-	3	5373	213
TCONS_00130096	XLOC_081749	XLOC_081749	novel	Novel_mRNA	NC_030830.1	41857753	41871433	+	3	13152	312
TCONS_00001368	XLOC_000876	XLOC_000876	novel	Novel_mRNA	NC_030808.1	78091490	78101342	+	2	3331	254
TCONS_00057762	XLOC_036672	XLOC_036672	novel	Novel_mRNA	NC_030816.1	28194412	28240563	-	12	1735	577
TCONS_00092351	102168656	RGS2	protein_coding	Novel_mRNA	NC_030823.1	10845732	11151170	+	2	20769	482
TCONS_00054253	XLOC_034302	XLOC_034302	novel	Novel_mRNA	NC_030815.1	92668427	92671358	-	2	2779	144
TCONS_00107666	XLOC_068416	XLOC_068416	novel	Novel_mRNA	NC_030825.1	56379672	56393228	-	10	3704	652
TCONS_00107667	XLOC_068416	XLOC_068416	novel	Novel_mRNA	NC_030825.1	56379672	56393251	-	12	3256	990
TCONS_00107664	XLOC_068416	XLOC_068416	novel	Novel_mRNA	NC_030825.1	56379672	56393228	-	11	3472	991
TCONS_00107665	XLOC_068416	XLOC_068416	novel	Novel_mRNA	NC_030825.1	56379672	56393228	-	9	4881	726
TCONS_00107663	XLOC_068416	XLOC_068416	novel	Novel_mRNA	NC_030825.1	56379672	56388464	-	9	2383	593
TCONS_00017292	XLOC_010947	XLOC_010947	novel	Novel_mRNA	NC_030810.1	101479681	101488622	+	2	4198	297
TCONS_00044691	102185999	JMJD4	protein_coding	Novel_mRNA	NC_030814.1	105330322	105399759	+	5	3938	532
TCONS_00102667	XLOC_065450	XLOC_065450	novel	Novel_mRNA	NC_030825.1	37183793	37186600	+	2	1612	409
TCONS_00000003	XLOC_000001	XLOC_000001	novel	Novel_mRNA	NC_005044.2	1102	6947	+	2	5030	153
TCONS_00121326	XLOC_076535	XLOC_076535	novel	Novel_mRNA	NC_030828.1	1443749	1462410	-	2	18641	414
TCONS_00082801	XLOC_052752	XLOC_052752	novel	Novel_mRNA	NC_030821.1	7114	45440	+	2	3985	271
TCONS_00005915	102178489	ATR	protein_coding	Novel_mRNA	NC_030808.1	126104879	126112300	-	2	4220	150
TCONS_00133678	102173250	ALPK2	protein_coding	Novel_mRNA	NC_030831.1	57884241	57912686	+	4	25466	764
TCONS_00103215	108638187	TRNAE-UUC	tRNA	Novel_mRNA	NC_030825.1	48163020	48191555	+	6	7087	482
TCONS_00103214	108638187	TRNAE-UUC	tRNA	Novel_mRNA	NC_030825.1	48162979	48191555	+	5	7095	482
TCONS_00152152	XLOC_095165	XLOC_095165	novel	Novel_mRNA	NW_017189516.1	36349750	36450059	+	3	92506	464
TCONS_00152150	XLOC_095165	XLOC_095165	novel	Novel_mRNA	NW_017189516.1	36329695	36450059	+	3	106395	464
TCONS_00124239	XLOC_078362	XLOC_078362	novel	Novel_mRNA	NC_030829.1	17030859	17047568	+	3	15740	284
TCONS_00061250	XLOC_039036	XLOC_039036	novel	Novel_mRNA	NC_030817.1	60006295	60019565	+	2	10481	210
TCONS_00152155	XLOC_095166	XLOC_095166	novel	Novel_mRNA	NW_017189516.1	36598164	36634536	+	2	13144	340
TCONS_00059551	XLOC_037886	XLOC_037886	novel	Novel_mRNA	NC_030817.1	6688133	6753905	+	4	7696	226
TCONS_00147255	102168802	RBM34	protein_coding	Novel_mRNA	NC_030835.1	37447451	37464255	-	2	5181	213
TCONS_00059553	XLOC_037886	XLOC_037886	novel	Novel_mRNA	NC_030817.1	6688211	6753905	+	2	12039	226
TCONS_00057910	102170049	POPDC3	protein_coding	Novel_mRNA	NC_030816.1	32069884	32156906	-	3	24635	247
TCONS_00014800	XLOC_009395	XLOC_009395	novel	Novel_mRNA	NC_030810.1	16047698	16071835	+	5	5962	228
TCONS_00160610	XLOC_101247	XLOC_101247	novel	Novel_mRNA	NW_017200381.1	6513	18954	+	5	1143	139
TCONS_00121204	XLOC_076463	XLOC_076463	novel	Novel_mRNA	NC_030828.1	68495035	68512129	+	11	1780	445
TCONS_00034012	108636154	TRNAD-GUC	tRNA	Novel_mRNA	NC_030812.1	61351129	61393014	-	4	4514	133
TCONS_00130097	XLOC_081749	XLOC_081749	novel	Novel_mRNA	NC_030830.1	41857753	41871433	+	2	13085	312
TCONS_00010628	XLOC_006885	XLOC_006885	novel	Novel_mRNA	NC_030809.1	2673859	2678348	-	5	1124	195
TCONS_00130095	XLOC_081749	XLOC_081749	novel	Novel_mRNA	NC_030830.1	41857060	41882421	+	2	25219	312
TCONS_00121205	XLOC_076463	XLOC_076463	novel	Novel_mRNA	NC_030828.1	68495035	68512129	+	11	1756	437
TCONS_00052780	XLOC_033370	XLOC_033370	novel	Novel_mRNA	NC_030815.1	45625247	45639622	-	2	11387	401
TCONS_00133673	102173250	ALPK2	protein_coding	Novel_mRNA	NC_030831.1	57881435	57912686	+	5	25307	764
TCONS_00133671	102173250	ALPK2	protein_coding	Novel_mRNA	NC_030831.1	57843419	57912686	+	2	14618	764
TCONS_00133677	102173250	ALPK2	protein_coding	Novel_mRNA	NC_030831.1	57881521	57912686	+	4	28008	764
TCONS_00127397	108633388	TRNAW-CCA	tRNA	Novel_mRNA	NC_030829.1	51837236	51850538	-	2	4660	264
TCONS_00121198	XLOC_076463	XLOC_076463	novel	Novel_mRNA	NC_030828.1	68475622	68512129	+	13	1634	544
TCONS_00133672	102173250	ALPK2	protein_coding	Novel_mRNA	NC_030831.1	57857349	57912686	+	2	15532	764
TCONS_00121207	XLOC_076469	XLOC_076469	novel	Novel_mRNA	NC_030828.1	68511560	68526804	+	14	4934	406
TCONS_00031695	XLOC_020072	XLOC_020072	novel	Novel_mRNA	NC_030812.1	111779608	111785280	+	2	4005	327
TCONS_00032977	102176763	LOC102176763	protein_coding	Novel_mRNA	NC_030812.1	31650703	31668909	-	3	1870	157
TCONS_00032976	102176763	LOC102176763	protein_coding	Novel_mRNA	NC_030812.1	31650703	31668857	-	3	1863	157
TCONS_00142615	XLOC_089184	XLOC_089184	novel	Novel_mRNA	NC_030834.1	948040	958349	+	2	8458	175
