# Supplementary material for: Identification and Characterization of lncRNAs Expression Profile Related to Goat Skeletal Muscle at Different Development Stages
Source: Animals (Basel). 2022 Oct 6;12(19):2683. doi: 10.3390/ani12192683 (PMC9558979; doi:10.3390/ani12192683)
Supplement: Supplementary file 1 [file animals-12-02683-s001.zip › Supplementary TableS4.xls]

## Sheet: mon1_vs_mon9.lncRNA.diffgene
Table S4. List of differentially expressed lncRNAs from two skeletal muscle developmental stages.
gene_id	gene_name	gene_locus	mon1_FPKM	mon9_FPKM	log2FoldChange	pvalue	padj	up_down
XLOC_039980	XLOC_039980	NC_030817.1:99781295-99953482	1.10542	0	-15.4725	1.15e-19	8.52e-16	down
XLOC_083880	XLOC_083880	NC_030831.1:52704419-52809889	0	0.392781	14.2776	8.7e-17	4.82e-13	up
XLOC_017916	XLOC_017916	NC_030812.1:23516516-23584187	0	0.526591	14.0602	3.95e-15	1.46e-11	up
100860822	CRSP-2	NC_030822.1:44618971-44717311	0	0.350792	14.0137	8.77e-15	2.78e-11	up
102184828	SLC30A8	NC_030821.1:34868099-34972024	0	0.274341	13.7391	6.66e-13	1.64e-09	up
XLOC_097072	XLOC_097072	NW_017189517.1:23502045-23582741	0	0.263699	13.3171	6.72e-11	1.49e-07	up
XLOC_016605	XLOC_016605	NC_030811.1:41609107-41686888	0	0.263699	13.2643	1.08e-10	2.18e-07	up
XLOC_026378	XLOC_026378	NC_030814.1:35462825-35527326	0	0.289486	13.128	3.75e-10	6.93e-07	up
XLOC_005237	XLOC_005237	NC_030809.1:25568138-25717680	0.00160767	1.38105	9.55064	4.58e-10	7.81e-07	up
XLOC_003282	XLOC_003282	NC_030808.1:88762504-88813187	0	0.269507	12.6784	1.31e-08	1.64e-05	up
102191574	LIPG	NC_030831.1:49397175-49423001	3.71252	30.3481	2.8986	1.02e-07	0.000113303	up
XLOC_063218	XLOC_063218	NC_030824.1:46013343-46036659	0	0.453777	12.3089	1.38e-07	0.000145127	up
XLOC_063244	XLOC_063244	NC_030824.1:51235901-51264702	0	0.280634	11.9215	1.08e-06	0.000775513	up
102186348	CSRNP1	NC_030829.1:12327297-12350404	11.4593	80.5598	2.55897	4e-06	0.00239777	up
XLOC_084658	XLOC_084658	NC_030831.1:49570529-49596457	0	0.244754	11.5715	5.34e-06	0.00295867	up
XLOC_067125	XLOC_067125	NC_030825.1:13980293-14049968	0.178977	0	-12.7004	9.21e-06	0.00440277	down
102170796	MYO16	NC_030819.1:1985596-2514783	0.931101	0.112116	-3.14681	9.34e-06	0.00440277	down
XLOC_084795	XLOC_084795	NC_030831.1:60275224-60290971	0	0.355687	11.3942	1.13e-05	0.00511829	up
108638635	MUSTN1	NC_030829.1:47964718-47968504	38.1412	240.038	2.43129	1.21e-05	0.00538062	up
102184972	LOC102184972	NC_030811.1:25478194-25551986	1.57961	5.42736	3.13724	1.8e-05	0.00739786	up
102169739	KCNJ5	NC_030836.1:31587098-31612454	1.36143	0.006336	-7.55425	2.08e-05	0.00780332	down
102175116	LOC102175116	NC_030825.1:61252747-61419804	1.23781	0.331213	-3.72988	2.11e-05	0.00780332	down
106502489	LOC106502489	NC_030816.1:84235928-84248678	9.16997	0.190088	-5.71123	2.7e-05	0.00934744	down
XLOC_042060	XLOC_042060	NC_030817.1:98969797-98993159	0.435118	0	-12.363	3.19e-05	0.0104131	down
102189162	ABHD2	NC_030828.1:19877474-19987289	6.07478	32.0809	2.19326	3.39e-05	0.0107309	up
XLOC_048169	XLOC_048169	NC_030819.1:30546743-30561580	0	0.294561	11.0346	4.14e-05	0.0124089	up
XLOC_083468	XLOC_083468	NC_030831.1:28111177-28126234	0	0.272821	10.9462	5.78e-05	0.015827	up
102187770	PM20D2	NC_030816.1:48251367-48271345	4.59393	22.4273	2.11138	0.000102972	0.024515	up
XLOC_053332	XLOC_053332	NC_030821.1:36840001-36858395	0.153872	3.29515	4.28755	0.00010399	0.024515	up
102174882	ACVR1C	NC_030809.1:97335789-97419251	0.512526	4.32777	2.66955	0.000121057	0.0278718	up
102186180	IFRD1	NC_030811.1:64313124-64386129	14.6632	94.8183	2.09336	0.000160036	0.0337798	up
102175843	IBSP	NC_030813.1:37375580-37462704	0.582131	0.055809	-3.49533	0.000164971	0.0341706	down
XLOC_003916	XLOC_003916	NC_030808.1:127194749-127201589	0	0.451661	10.5332	0.000182625	0.0355045	up
102176682	NCAPG	NC_030813.1:37858058-37903142	1.63499	7.95881	2.17361	0.00024064	0.0440218	up
XLOC_003442	XLOC_003442	NC_030808.1:106364707-106390271	0.437711	3.71252	3.07558	0.000242791	0.0440218	up
XLOC_094632	XLOC_094632	NW_017189516.1:9527525-9548180	0.09611	1.5424	3.73591	0.000281104	0.0492117	up
