# Supplementary material for: Identification and Characterization of lncRNAs Expression Profile Related to Goat Skeletal Muscle at Different Development Stages
Source: Animals (Basel). 2022 Oct 6;12(19):2683. doi: 10.3390/ani12192683 (PMC9558979; doi:10.3390/ani12192683)
Supplement: Supplementary file 1 [file animals-12-02683-s001.zip › Supplementary TableS5.xls]

## Sheet: co-location 100kb
Table S5 Protein-coding genes detected 100 kb upstream and downstream of the differentially expressed lncRNAs.
Chromosome	lncRNA_ID	lncRNA_Gene_ID	lncRNA_Gene_Symbol	lncRNA_Status	lncRNA_Start	lncRNA_End	lncRNA_Strand	Gene_Id	Gene_Symbol	Gene_Start	Gene_End	Gene_Strand	Distance	Location
Chr 10	TCONS_00062751	XLOC_039980	XLOC_039980	Novel_lncRNA	99781295	99885949	+	102184724	APC	99981107	100120748	+	95158	upstream
Chr 10	TCONS_00062751	XLOC_039980	XLOC_039980	Novel_lncRNA	99781295	99885949	+	102187406	EPB41L4A	99479662	99763798	-	17717	upstream
Chr 10	TCONS_00062752	XLOC_039980	XLOC_039980	Novel_lncRNA	99781308	99880915	+	102187406	EPB41L4A	99479662	99763798	-	17730	upstream
Chr 10	TCONS_00062751	XLOC_039980	XLOC_039980	Novel_lncRNA	99781295	99885949	+	102184724	APC	99981107	100120748	+	95158	upstream
Chr 10	TCONS_00062753	XLOC_039980	XLOC_039980	Novel_lncRNA	99781308	99953482	+	102187406	EPB41L4A	99479662	99763798	-	17730	upstream
Chr 24	TCONS_00133549	XLOC_083880	XLOC_083880	Novel_lncRNA	52704419	52809889	+	108633778	LOC108633778	52829101	52882880	+	19212	upstream
Chr 5	TCONS_00028249	XLOC_017916	XLOC_017916	Novel_lncRNA	23516516	23584187	+	102179736	CRADD	23232978	23425649	+	90866	downstream
Chr 5	TCONS_00028249	XLOC_017916	XLOC_017916	Novel_lncRNA	23516516	23584187	+	102175748	PLXNC1	23678274	23833799	+	94087	upstream
Chr 15	TCONS_00088675	100860822	CRSP-2	Novel_lncRNA	44618971	44717311	+	100861290	CRSP-1	44554421	44557706	+	61264	downstream
Chr 15	TCONS_00088675	100860822	CRSP-2	Novel_lncRNA	44618971	44717311	+	100860822	CRSP-2	44708222	44713758	-	-5453	antisense
Chr 14	TCONS_00085732	102184828	SLC30A8	Novel_lncRNA	34868099	34972024	-	102184828	SLC30A8	34911207	34959380	+	-48173	antisense
Chr 7	TCONS_00041415	XLOC_026378	XLOC_026378	Novel_lncRNA	35462825	35527326	+	102184904	CCNG1	35432745	35440042	-	22784	upstream
Chr 7	TCONS_00041415	XLOC_026378	XLOC_026378	Novel_lncRNA	35462825	35527326	+	102186305	MAT2B	35351609	35370826	-	91998	upstream
Chr 7	TCONS_00041415	XLOC_026378	XLOC_026378	Novel_lncRNA	35462825	35527326	+	102185178	NUDCD2	35416897	35423705	+	39119	downstream
Chr 7	TCONS_00041415	XLOC_026378	XLOC_026378	Novel_lncRNA	35462825	35527326	+	102185463	HMMR	35385076	35416800	-	46024	upstream
Chr 24	TCONS_00134756	102191574	LIPG	Novel_lncRNA	49400926	49423001	-	100861018	LOC100861018	49347696	49352278	-	48647	upstream
Chr 24	TCONS_00134756	102191574	LIPG	Novel_lncRNA	49400926	49423001	-	102191293	C24H18orf32	49341635	49346058	-	54867	upstream
Chr 24	TCONS_00134756	102191574	LIPG	Novel_lncRNA	49400926	49423001	-	102190752	DYM	48927763	49320313	-	80613	upstream
Chr 24	TCONS_00134756	102191574	LIPG	Novel_lncRNA	49400926	49423001	-	102191574	LIPG	49397174	49422345	+	-21420	antisense
Chr 22	TCONS_00126170	102186348	CSRNP1	Novel_lncRNA	12339889	12350404	-	102186061	WDR48	12232741	12279767	+	60121	downstream
Chr 22	TCONS_00126170	102186348	CSRNP1	Novel_lncRNA	12339889	12350404	-	102177669	GORASP1	12279762	12296102	-	43786	upstream
Chr 22	TCONS_00126170	102186348	CSRNP1	Novel_lncRNA	12339889	12350404	-	102187274	CX3CR1	12418483	12432701	-	68079	downstream
Chr 22	TCONS_00126170	102186348	CSRNP1	Novel_lncRNA	12339889	12350404	-	102185787	TTC21A	12290971	12324605	+	15283	downstream
Chr 22	TCONS_00126170	102186348	CSRNP1	Novel_lncRNA	12339889	12350404	-	102187007	XIRP1	12356508	12365781	-	6104	downstream
Chr 22	TCONS_00126170	102186348	CSRNP1	Novel_lncRNA	12339889	12350404	-	102186348	CSRNP1	12327296	12340853	-	-965	sense
Chr 24	TCONS_00134767	XLOC_084658	XLOC_084658	Novel_lncRNA	49570529	49596457	-	108633809	LOC108633809	49546886	49548366	-	22162	upstream
Chr 24	TCONS_00134767	XLOC_084658	XLOC_084658	Novel_lncRNA	49570529	49596457	-	102168225	MYO5B	49674116	50014782	-	77659	downstream
Chr 24	TCONS_00134767	XLOC_084658	XLOC_084658	Novel_lncRNA	49570529	49596457	-	102183474	ACAA2	49627956	49660853	-	31499	downstream
Chr 12	TCONS_00073557	102170796	MYO16	Novel_lncRNA	2388723	2514783	+	102170796	MYO16	1985595	2514686	-	-125964	antisense
Chr 24	TCONS_00135003	XLOC_084795	XLOC_084795	Novel_lncRNA	60275224	60290971	-	102182087	CDH20	60053424	60266824	+	8399	downstream
Chr 22	TCONS_00124841	108638635	MUSTN1	Novel_lncRNA	47965082	47966999	+	102171745	LOC102171745	47910143	47964154	+	927	downstream
Chr 22	TCONS_00124841	108638635	MUSTN1	Novel_lncRNA	47965082	47966999	+	102178312	ITIH3	47987805	48001713	-	20806	downstream
Chr 22	TCONS_00124841	108638635	MUSTN1	Novel_lncRNA	47965082	47966999	+	102178021	ITIH4	47969322	47984330	+	2323	upstream
Chr 22	TCONS_00124841	108638635	MUSTN1	Novel_lncRNA	47965082	47966999	+	102179335	ITIH1	48008920	48023347	-	41921	downstream
Chr 22	TCONS_00124841	108638635	MUSTN1	Novel_lncRNA	47965082	47966999	+	108638635	MUSTN1	47965081	47966999	+	-1918	sense
Chr 22	TCONS_00124841	108638635	MUSTN1	Novel_lncRNA	47965082	47966999	+	102172014	SPCS1	48066411	48070893	-	99412	downstream
Chr 22	TCONS_00124841	108638635	MUSTN1	Novel_lncRNA	47965082	47966999	+	102179611	NEK4	48034945	48064610	+	67946	upstream
Chr 22	TCONS_00124841	108638635	MUSTN1	Novel_lncRNA	47965082	47966999	+	102177108	SFMBT1	47789121	47903604	+	61477	downstream
Chr 29	TCONS_00150002	102169739	KCNJ5	Novel_lncRNA	31588460	31607390	-	102185635	ARHGAP32	31652519	31856901	-	45129	downstream
Chr 29	TCONS_00150002	102169739	KCNJ5	Novel_lncRNA	31588460	31607390	-	102169739	KCNJ5	31587097	31612454	+	-18931	antisense
Chr 29	TCONS_00150002	102169739	KCNJ5	Novel_lncRNA	31588460	31607390	-	102169260	KCNJ1	31536020	31569472	-	18987	upstream
Chr 29	TCONS_00150002	102169739	KCNJ5	Novel_lncRNA	31588460	31607390	-	102168980	FLI1	31369192	31509058	+	79401	downstream
Chr 18	TCONS_00108175	102175116	LOC102175116	Novel_lncRNA	61266227	61419804	-	102175116	LOC102175116	61252746	61281793	-	-15567	sense
Chr 18	TCONS_00108175	102175116	LOC102175116	Novel_lncRNA	61266227	61419804	-	108633323	LOC108633323	61313215	61326871	-	-13656	sense
Chr 18	TCONS_00108175	102175116	LOC102175116	Novel_lncRNA	61266227	61419804	-	102172054	LOC102172054	61411666	61450833	-	-8138	sense
Chr 18	TCONS_00108175	102175116	LOC102175116	Novel_lncRNA	61266227	61419804	-	102189578	LOC102189578	61472018	61485218	-	52214	downstream
Chr 18	TCONS_00108175	102175116	LOC102175116	Novel_lncRNA	61266227	61419804	-	102173183	LOC102173183	61178650	61185935	-	80291	upstream
Chr 9	XR_001296113.2	106502489	LOC106502489	Annotated_lncRNA	84240488	84248678	-	102172812	PARK2	84276198	85489623	-	27520	downstream
Chr 9	XR_001296113.2	106502489	LOC106502489	Annotated_lncRNA	84240488	84248678	-	102185364	AGPAT4	84094635	84235536	-	4951	upstream
Chr 10	TCONS_00066056	XLOC_042060	XLOC_042060	Novel_lncRNA	98969797	98993159	-	102185569	NREP	99044403	99077196	-	51244	downstream
Chr 21	TCONS_00121767	102189162	ABHD2	Novel_lncRNA	19877474	19881266	-	100861394	MFGE8	19767791	19795415	-	82058	upstream
Chr 21	TCONS_00121767	102189162	ABHD2	Novel_lncRNA	19877474	19881266	-	102189162	ABHD2	19878101	19987289	+	-3165	antisense
Chr 21	TCONS_00121766	102189162	ABHD2	Novel_lncRNA	19877474	19881266	-	100861394	MFGE8	19767791	19795415	-	82058	upstream
Chr 21	TCONS_00121766	102189162	ABHD2	Novel_lncRNA	19877474	19881266	-	102189162	ABHD2	19878101	19987289	+	-3165	antisense
Chr 9	TCONS_00055857	102187770	PM20D2	Novel_lncRNA	48266439	48271345	+	102176798	SRSF12	48298194	48314408	+	26849	upstream
Chr 9	TCONS_00055857	102187770	PM20D2	Novel_lncRNA	48266439	48271345	+	102176535	GABRR1	48210597	48244438	+	22000	downstream
Chr 9	TCONS_00055857	102187770	PM20D2	Novel_lncRNA	48266439	48271345	+	102187770	PM20D2	48255380	48268619	-	-2181	antisense
Chr 9	TCONS_00055857	102187770	PM20D2	Novel_lncRNA	48266439	48271345	+	102177063	PNRC1	48326273	48330403	-	54928	downstream
Chr 9	TCONS_00055857	102187770	PM20D2	Novel_lncRNA	48266439	48271345	+	102176240	GABRR2	48142689	48184446	+	81992	downstream
Chr 14	TCONS_00083603	XLOC_053332	XLOC_053332	Novel_lncRNA	36840001	36846358	+	102181613	COLEC10	36889324	36966427	+	42966	upstream
Chr 14	TCONS_00083603	XLOC_053332	XLOC_053332	Novel_lncRNA	36840001	36846358	+	100860896	TNFRSF11B	36764977	36794513	-	45487	upstream
Chr 2	TCONS_00009396	102174882	ACVR1C	Novel_lncRNA	97391038	97419251	+	102174882	ACVR1C	97335788	97391095	-	-58	antisense
Chr 4	TCONS_00026839	102186180	IFRD1	Novel_lncRNA	64339024	64345501	-	102186180	IFRD1	64313123	64340543	+	-1520	antisense
Chr 4	TCONS_00026839	102186180	IFRD1	Novel_lncRNA	64339024	64345501	-	102185529	LSMEM1	64343999	64354661	+	-1502	antisense
Chr 4	TCONS_00026838	102186180	IFRD1	Novel_lncRNA	64339024	64345501	-	102186180	IFRD1	64313123	64340543	+	-1520	antisense
Chr 4	TCONS_00026838	102186180	IFRD1	Novel_lncRNA	64339024	64345501	-	102185529	LSMEM1	64343999	64354661	+	-1502	antisense
Chr 6	TCONS_00036756	102175843	IBSP	Novel_lncRNA	37375580	37462704	+	102175196	MEPE	37364321	37378677	-	-3098	antisense
Chr 6	TCONS_00036756	102175843	IBSP	Novel_lncRNA	37375580	37462704	+	102175843	IBSP	37401128	37414623	-	-13495	antisense
Chr 1	TCONS_00005969	XLOC_003916	XLOC_003916	Novel_lncRNA	127194749	127201589	-	102183108	PXYLP1	127206582	127295176	-	4993	downstream
Chr 1	TCONS_00005969	XLOC_003916	XLOC_003916	Novel_lncRNA	127194749	127201589	-	102181901	ZBTB38	127054587	127190159	-	4589	upstream
Chr 6	TCONS_00036792	102176682	NCAPG	Novel_lncRNA	37901623	37903142	+	102177422	DCAF16	37847373	37858012	-	43610	upstream
Chr 6	TCONS_00036792	102176682	NCAPG	Novel_lncRNA	37901623	37903142	+	102176682	NCAPG	37858057	37903119	+	-1497	sense
Chr 6	TCONS_00036792	102176682	NCAPG	Novel_lncRNA	37901623	37903142	+	102190595	LCORL	37904350	38069012	-	1208	downstream
Chr 6	TCONS_00036792	102176682	NCAPG	Novel_lncRNA	37901623	37903142	+	102190313	FAM184B	37705388	37826197	-	75425	upstream
Chr 1	TCONS_00005333	XLOC_003442	XLOC_003442	Novel_lncRNA	106371531	106390264	-	102173418	KPNA4	106451303	106512689	+	61039	upstream
Chr 1	TCONS_00005333	XLOC_003442	XLOC_003442	Novel_lncRNA	106371531	106390264	-	102172844	PPM1L	105943028	106273274	-	98256	upstream
Chr 1	TCONS_00005333	XLOC_003442	XLOC_003442	Novel_lncRNA	106371531	106390264	-	102173127	ARL14	106359586	106360584	-	10946	upstream
Chr X	TCONS_00151400	XLOC_094632	XLOC_094632	Novel_lncRNA	9527525	9548180	+	102183305	PHKA1	9352164	9527318	-	486	upstream
