# Supplementary material for: Identification and Characterization of lncRNAs Expression Profile Related to Goat Skeletal Muscle at Different Development Stages
Source: Animals (Basel). 2022 Oct 6;12(19):2683. doi: 10.3390/ani12192683 (PMC9558979; doi:10.3390/ani12192683)
Supplement: Supplementary file 1 [file animals-12-02683-s001.zip › Supplementary TableS6.xls]

## Sheet: 1 month VS 9 months cis-GO
Table S6 GO enrichment analysis of protein-coding genes co-located with lncRNAs.
category	ID	Description	GeneRatio	BgRatio	pvalue	p.adjust	qvalue	gene	ListHits	ListTotal	PopHits	PopTotal	pval	padj(FDR)	Enrichment_score
biological_process	GO:0030212	hyaluronan metabolic process	4/55	39/18862	4.93251e-06	0.00440967	0.00404985	HMMR/ITIH1/ITIH3/ITIH4	4	55	39	18862	0.0727273	0.00206765	0.0284302
biological_process	GO:0030203	glycosaminoglycan metabolic process	5/55	158/18862	9.60477e-05	0.0426515	0.0391713	HMMR/ITIH1/ITIH3/ITIH4/PXYLP1	5	55	158	18862	0.0909091	0.00837663	0.0921429
biological_process	GO:0006022	aminoglycan metabolic process	5/55	172/18862	0.000143126	0.0426515	0.0391713	HMMR/ITIH1/ITIH3/ITIH4/PXYLP1	5	55	172	18862	0.0909091	0.00911886	0.100307
biological_process	GO:1903510	mucopolysaccharide metabolic process	4/55	115/18862	0.000351867	0.0786423	0.0722253	HMMR/ITIH1/ITIH3/ITIH4	4	55	115	18862	0.0727273	0.00609691	0.0838326
biological_process	GO:0001501	skeletal system development	7/55	486/18862	0.000502879	0.0899147	0.082578	CSRNP1/DYM/FLI1/MEPE/MUSTN1/TNFRSF11B/WDR48	7	55	486	18862	0.127273	0.0257661	0.202448
molecular_function	GO:0015276	ligand-gated ion channel activity	4/54	139/18337	0.000745364	0.0708095	0.0494294	GABRR1/GABRR2/KCNJ1/KCNJ5	4	54	139	18337	0.0740741	0.0075803	0.102334
molecular_function	GO:0022834	ligand-gated channel activity	4/54	139/18337	0.000745364	0.0708095	0.0494294	GABRR1/GABRR2/KCNJ1/KCNJ5	4	54	139	18337	0.0740741	0.0075803	0.102334
cellular_component	GO:0031089	platelet dense granule lumen	2/57	14/19520	0.00074538	0.0526281	0.0411018	ITIH3/ITIH4	2	57	14	19520	0.0350877	0.000717213	0.0204406
cellular_component	GO:1902711	GABA-A receptor complex	2/57	19/19520	0.00138759	0.0526281	0.0411018	GABRR1/GABRR2	2	57	19	19520	0.0350877	0.000973361	0.0277408
molecular_function	GO:0004890	GABA-A receptor activity	2/54	19/18337	0.00140956	0.0715772	0.0499652	GABRR1/GABRR2	2	54	19	18337	0.037037	0.00103616	0.0279762
molecular_function	GO:1902710	GABA receptor complex	2/57	20/19520	0.00153888	0.0526281	0.0411018	GABRR1/GABRR2	2	57	20	19520	0.0350877	0.00102459	0.0292008
cellular_component	GO:0042827	platelet dense granule	2/57	21/19520	0.00169768	0.0526281	0.0411018	ITIH3/ITIH4	2	57	21	19520	0.0350877	0.00107582	0.0306609
molecular_function	GO:0005242	inward rectifier potassium channel activity	2/54	22/18337	0.00189339	0.0715772	0.0499652	KCNJ1/KCNJ5	2	54	22	18337	0.037037	0.00119976	0.0323935
molecular_function	GO:0016917	GABA receptor activity	2/54	22/18337	0.00189339	0.0715772	0.0499652	GABRR1/GABRR2	2	54	22	18337	0.037037	0.00119976	0.0323935
cellular_component	GO:1902554	serine/threonine protein kinase complex	3/57	89/19520	0.00224409	0.0556533	0.0434644	ACVR1C/CCNG1/PHKA1	3	57	89	19520	0.0526316	0.00455943	0.0866291
biological_process	GO:0007214	gamma-aminobutyric acid signaling pathway	2/55	27/18862	0.0027964	0.324922	0.298409	GABRR1/GABRR2	2	55	27	18862	0.0363636	0.00143145	0.0393649
biological_process	GO:0150089	multiple spine synapse organization	1/55	1/18862	0.00291592	0.324922	0.298409	CX3CR1	1	55	1	18862	0.0181818	5.30166e-05	0.00291592
biological_process	GO:0150090	multiple spine synapse organization, single dendrite	1/55	1/18862	0.00291592	0.324922	0.298409	CX3CR1	1	55	1	18862	0.0181818	5.30166e-05	0.00291592
molecular_function	GO:0016495	C-X3-C chemokine receptor activity	1/54	1/18337	0.00294487	0.0715772	0.0499652	CX3CR1	1	54	1	18337	0.0185185	5.45345e-05	0.00294487
molecular_function	GO:0048270	methionine adenosyltransferase regulator activity	1/54	1/18337	0.00294487	0.0715772	0.0499652	MAT2B	1	54	1	18337	0.0185185	5.45345e-05	0.00294487
molecular_function	GO:0004867	serine-type endopeptidase inhibitor activity	3/54	98/18337	0.00301378	0.0715772	0.0499652	ITIH1/ITIH3/ITIH4	3	54	98	18337	0.0555556	0.00534439	0.0961989
cellular_component	GO:1902911	protein kinase complex	3/57	104/19520	0.00348911	0.0695828	0.0543431	ACVR1C/CCNG1/PHKA1	3	57	104	19520	0.0526316	0.00532787	0.10123
cellular_component	GO:0016342	catenin complex	2/57	32/19520	0.00392806	0.0695828	0.0543431	APC/CDH20	2	57	32	19520	0.0350877	0.00163934	0.0467213
biological_process	GO:2000134	negative regulation of G1/S transition of mitotic cell cycle	3/55	119/18862	0.00505951	0.324922	0.298409	APC/CRADD/MYO16	3	55	119	18862	0.0545455	0.00630898	0.115665
biological_process	GO:1902807	negative regulation of cell cycle G1/S phase transition	3/55	124/18862	0.00567203	0.324922	0.298409	APC/CRADD/MYO16	3	55	124	18862	0.0545455	0.00657406	0.120525
biological_process	GO:0007518	myoblast fate determination	1/55	2/18862	0.00582348	0.324922	0.298409	IFRD1	1	55	2	18862	0.0181818	0.000106033	0.00583183
biological_process	GO:0042483	negative regulation of odontogenesis	1/55	2/18862	0.00582348	0.324922	0.298409	TNFRSF11B	1	55	2	18862	0.0181818	0.000106033	0.00583183
biological_process	GO:0042489	negative regulation of odontogenesis of dentin-containing tooth	1/55	2/18862	0.00582348	0.324922	0.298409	TNFRSF11B	1	55	2	18862	0.0181818	0.000106033	0.00583183
biological_process	GO:0110091	negative regulation of hippocampal neuron apoptotic process	1/55	2/18862	0.00582348	0.324922	0.298409	CX3CR1	1	55	2	18862	0.0181818	0.000106033	0.00583183
biological_process	GO:0110111	negative regulation of animal organ morphogenesis	1/55	2/18862	0.00582348	0.324922	0.298409	TNFRSF11B	1	55	2	18862	0.0181818	0.000106033	0.00583183
biological_process	GO:1901383	negative regulation of chorionic trophoblast cell proliferation	1/55	2/18862	0.00582348	0.324922	0.298409	ACVR1C	1	55	2	18862	0.0181818	0.000106033	0.00583183
cellular_component	GO:0048269	methionine adenosyltransferase complex	1/57	2/19520	0.00583179	0.0903927	0.0705953	MAT2B	1	57	2	19520	0.0175439	0.000102459	0.00584016
molecular_function	GO:0033878	hormone-sensitive lipase activity	1/54	2/18337	0.00588122	0.101867	0.0711094	ABHD2	1	54	2	18337	0.0185185	0.000109069	0.00588973
molecular_function	GO:1904315	transmitter-gated ion channel activity involved in regulation of postsynaptic membrane potential	2/54	44/18337	0.00743956	0.101867	0.0711094	GABRR1/GABRR2	2	54	44	18337	0.037037	0.00239952	0.064787
biological_process	GO:0052548	regulation of endopeptidase activity	5/55	426/18862	0.00790853	0.324922	0.298409	ACVR1C/CRADD/ITIH1/ITIH3/ITIH4	5	55	426	18862	0.0909091	0.0225851	0.248436
biological_process	GO:1990573	potassium ion import across plasma membrane	2/55	47/18862	0.00829738	0.324922	0.298409	KCNJ1/KCNJ5	2	55	47	18862	0.0363636	0.00249178	0.068524
molecular_function	GO:0099529	neurotransmitter receptor activity involved in regulation of postsynaptic membrane potential	2/54	47/18337	0.00845352	0.101867	0.0711094	GABRR1/GABRR2	2	54	47	18337	0.037037	0.00256312	0.0692043
biological_process	GO:0046461	neutral lipid catabolic process	2/55	48/18862	0.00864205	0.324922	0.298409	ABHD2/LIPG	2	55	48	18862	0.0363636	0.0025448	0.069982
biological_process	GO:0046464	acylglycerol catabolic process	2/55	48/18862	0.00864205	0.324922	0.298409	ABHD2/LIPG	2	55	48	18862	0.0363636	0.0025448	0.069982
biological_process	GO:0001834	trophectodermal cell proliferation	1/55	3/18862	0.00872273	0.324922	0.298409	ACVR1C	1	55	3	18862	0.0181818	0.00015905	0.00874775
biological_process	GO:0010908	regulation of heparan sulfate proteoglycan biosynthetic process	1/55	3/18862	0.00872273	0.324922	0.298409	PXYLP1	1	55	3	18862	0.0181818	0.00015905	0.00874775
biological_process	GO:0010909	positive regulation of heparan sulfate proteoglycan biosynthetic process	1/55	3/18862	0.00872273	0.324922	0.298409	PXYLP1	1	55	3	18862	0.0181818	0.00015905	0.00874775
biological_process	GO:0019082	viral protein processing	1/55	3/18862	0.00872273	0.324922	0.298409	SPCS1	1	55	3	18862	0.0181818	0.00015905	0.00874775
molecular_function	GO:0050733	RS domain binding	1/54	3/18337	0.00880908	0.101867	0.0711094	SRSF12	1	54	3	18337	0.0185185	0.000163604	0.0088346
molecular_function	GO:0099507	ligand-gated ion channel activity involved in regulation of presynaptic membrane potential	1/54	3/18337	0.00880908	0.101867	0.0711094	GABRR1	1	54	3	18337	0.0185185	0.000163604	0.0088346
cellular_component	GO:0072562	blood microparticle	3/57	146/19520	0.00893125	0.116324	0.090847	ITIH1/ITIH4/ZBTB38	3	57	146	19520	0.0526316	0.00747951	0.142111
cellular_component	GO:0034707	chloride channel complex	2/57	50/19520	0.00938094	0.116324	0.090847	GABRR1/GABRR2	2	57	50	19520	0.0350877	0.00256148	0.073002
biological_process	GO:0052547	regulation of peptidase activity	5/55	455/18862	0.010333	0.3323	0.305186	ACVR1C/CRADD/ITIH1/ITIH3/ITIH4	5	55	455	18862	0.0909091	0.0241226	0.265348
biological_process	GO:0007338	single fertilization	3/55	160/18862	0.0113846	0.3323	0.305186	ABHD2/MFGE8/WDR48	3	55	160	18862	0.0545455	0.00848266	0.155515
cellular_component	GO:0034702	ion channel complex	4/57	301/19520	0.0115374	0.116572	0.091041	GABRR1/GABRR2/KCNJ1/KCNJ5	4	57	301	19520	0.0701754	0.0154201	0.219736
biological_process	GO:0006556	S-adenosylmethionine biosynthetic process	1/55	4/18862	0.0116137	0.3323	0.305186	MAT2B	1	55	4	18862	0.0181818	0.000212067	0.0116637
biological_process	GO:0110088	hippocampal neuron apoptotic process	1/55	4/18862	0.0116137	0.3323	0.305186	CX3CR1	1	55	4	18862	0.0181818	0.000212067	0.0116637
biological_process	GO:0110089	regulation of hippocampal neuron apoptotic process	1/55	4/18862	0.0116137	0.3323	0.305186	CX3CR1	1	55	4	18862	0.0181818	0.000212067	0.0116637
biological_process	GO:1902730	positive regulation of proteoglycan biosynthetic process	1/55	4/18862	0.0116137	0.3323	0.305186	PXYLP1	1	55	4	18862	0.0181818	0.000212067	0.0116637
molecular_function	GO:0004689	phosphorylase kinase activity	1/54	4/18337	0.0117285	0.101867	0.0711094	PHKA1	1	54	4	18337	0.0185185	0.000218138	0.0117795
molecular_function	GO:0015467	G-protein activated inward rectifier potassium channel activity	1/54	4/18337	0.0117285	0.101867	0.0711094	KCNJ5	1	54	4	18337	0.0185185	0.000218138	0.0117795
molecular_function	GO:0086089	voltage-gated potassium channel activity involved in atrial cardiac muscle cell action potential repolarization	1/54	4/18337	0.0117285	0.101867	0.0711094	KCNJ5	1	54	4	18337	0.0185185	0.000218138	0.0117795
cellular_component	GO:0016459	myosin complex	2/57	57/19520	0.0120638	0.116572	0.091041	MYO16/MYO5B	2	57	57	19520	0.0350877	0.00292008	0.0832223
molecular_function	GO:0022824	transmitter-gated ion channel activity	2/54	59/18337	0.0130827	0.101867	0.0711094	GABRR1/GABRR2	2	54	59	18337	0.037037	0.00321754	0.0868735
molecular_function	GO:0022835	transmitter-gated channel activity	2/54	59/18337	0.0130827	0.101867	0.0711094	GABRR1/GABRR2	2	54	59	18337	0.037037	0.00321754	0.0868735
cellular_component	GO:0019897	extrinsic component of plasma membrane	3/57	169/19520	0.0132534	0.116572	0.091041	APC/CDH20/MFGE8	3	57	169	19520	0.0526316	0.00865779	0.164498
biological_process	GO:2000045	regulation of G1/S transition of mitotic cell cycle	3/55	174/18862	0.0142526	0.3323	0.305186	APC/CRADD/MYO16	3	55	174	18862	0.0545455	0.0092249	0.169123
molecular_function	GO:0098960	postsynaptic neurotransmitter receptor activity	2/54	62/18337	0.0143781	0.101867	0.0711094	GABRR1/GABRR2	2	54	62	18337	0.037037	0.00338114	0.0912908
biological_process	GO:0048625	myoblast fate commitment	1/55	5/18862	0.0144963	0.3323	0.305186	IFRD1	1	55	5	18862	0.0181818	0.000265083	0.0145796
biological_process	GO:0051793	medium-chain fatty acid catabolic process	1/55	5/18862	0.0144963	0.3323	0.305186	ABHD2	1	55	5	18862	0.0181818	0.000265083	0.0145796
biological_process	GO:0061088	regulation of sequestering of zinc ion	1/55	5/18862	0.0144963	0.3323	0.305186	SLC30A8	1	55	5	18862	0.0181818	0.000265083	0.0145796
biological_process	GO:0097360	chorionic trophoblast cell proliferation	1/55	5/18862	0.0144963	0.3323	0.305186	ACVR1C	1	55	5	18862	0.0181818	0.000265083	0.0145796
biological_process	GO:0099505	regulation of presynaptic membrane potential	1/55	5/18862	0.0144963	0.3323	0.305186	GABRR1	1	55	5	18862	0.0181818	0.000265083	0.0145796
biological_process	GO:1901382	regulation of chorionic trophoblast cell proliferation	1/55	5/18862	0.0144963	0.3323	0.305186	ACVR1C	1	55	5	18862	0.0181818	0.000265083	0.0145796
biological_process	GO:1902109	negative regulation of mitochondrial membrane permeability involved in apoptotic process	1/55	5/18862	0.0144963	0.3323	0.305186	ACAA2	1	55	5	18862	0.0181818	0.000265083	0.0145796
biological_process	GO:1904885	beta-catenin destruction complex assembly	1/55	5/18862	0.0144963	0.3323	0.305186	APC	1	55	5	18862	0.0181818	0.000265083	0.0145796
cellular_component	GO:0005964	phosphorylase kinase complex	1/57	5/19520	0.0145169	0.116572	0.091041	PHKA1	1	57	5	19520	0.0175439	0.000256148	0.0146004
cellular_component	GO:1902495	transmembrane transporter complex	4/57	323/19520	0.0146161	0.116572	0.091041	GABRR1/GABRR2/KCNJ1/KCNJ5	4	57	323	19520	0.0701754	0.0165471	0.235797
molecular_function	GO:0003985	acetyl-CoA C-acetyltransferase activity	1/54	5/18337	0.0146394	0.101867	0.0711094	ACAA2	1	54	5	18337	0.0185185	0.000272673	0.0147243
molecular_function	GO:0003986	acetyl-CoA hydrolase activity	1/54	5/18337	0.0146394	0.101867	0.0711094	ACAA2	1	54	5	18337	0.0185185	0.000272673	0.0147243
molecular_function	GO:0004465	lipoprotein lipase activity	1/54	5/18337	0.0146394	0.101867	0.0711094	LIPG	1	54	5	18337	0.0185185	0.000272673	0.0147243
molecular_function	GO:0008126	acetylesterase activity	1/54	5/18337	0.0146394	0.101867	0.0711094	ABHD2	1	54	5	18337	0.0185185	0.000272673	0.0147243
molecular_function	GO:0016361	activin receptor activity, type I	1/54	5/18337	0.0146394	0.101867	0.0711094	ACVR1C	1	54	5	18337	0.0185185	0.000272673	0.0147243
molecular_function	GO:0019960	C-X3-C chemokine binding	1/54	5/18337	0.0146394	0.101867	0.0711094	CX3CR1	1	54	5	18337	0.0185185	0.000272673	0.0147243
molecular_function	GO:0038100	nodal binding	1/54	5/18337	0.0146394	0.101867	0.0711094	ACVR1C	1	54	5	18337	0.0185185	0.000272673	0.0147243
molecular_function	GO:1990430	extracellular matrix protein binding	1/54	5/18337	0.0146394	0.101867	0.0711094	MEPE	1	54	5	18337	0.0185185	0.000272673	0.0147243
cellular_component	GO:0098982	GABA-ergic synapse	2/57	64/19520	0.0150416	0.116572	0.091041	GABRR1/GABRR2	2	57	64	19520	0.0350877	0.00327869	0.0934426
molecular_function	GO:0004866	endopeptidase inhibitor activity	3/54	180/18337	0.0159972	0.101867	0.0711094	ITIH1/ITIH3/ITIH4	3	54	180	18337	0.0555556	0.00981622	0.176692
cellular_component	GO:1990351	transporter complex	4/57	338/19520	0.0169883	0.119663	0.0934548	GABRR1/GABRR2/KCNJ1/KCNJ5	4	57	338	19520	0.0701754	0.0173156	0.246747
molecular_function	GO:0022836	gated channel activity	4/54	337/18337	0.0172384	0.101867	0.0711094	GABRR1/GABRR2/KCNJ1/KCNJ5	4	54	337	18337	0.0740741	0.0183781	0.248105
biological_process	GO:0010983	positive regulation of high-density lipoprotein particle clearance	1/55	6/18862	0.0173707	0.341355	0.313501	LIPG	1	55	6	18862	0.0181818	0.0003181	0.0174955
biological_process	GO:0021626	central nervous system maturation	1/55	6/18862	0.0173707	0.341355	0.313501	CX3CR1	1	55	6	18862	0.0181818	0.0003181	0.0174955
biological_process	GO:0051792	medium-chain fatty acid biosynthetic process	1/55	6/18862	0.0173707	0.341355	0.313501	ABHD2	1	55	6	18862	0.0181818	0.0003181	0.0174955
biological_process	GO:1902525	regulation of protein monoubiquitination	1/55	6/18862	0.0173707	0.341355	0.313501	WDR48	1	55	6	18862	0.0181818	0.0003181	0.0174955
biological_process	GO:1903721	positive regulation of I-kappaB phosphorylation	1/55	6/18862	0.0173707	0.341355	0.313501	CX3CR1	1	55	6	18862	0.0181818	0.0003181	0.0174955
cellular_component	GO:0005787	signal peptidase complex	1/57	6/19520	0.0173953	0.119663	0.0934548	SPCS1	1	57	6	19520	0.0175439	0.000307377	0.0175205
molecular_function	GO:0015272	ATP-activated inward rectifier potassium channel activity	1/54	6/18337	0.017542	0.101867	0.0711094	KCNJ1	1	54	6	18337	0.0185185	0.000327207	0.0176692
molecular_function	GO:0016453	C-acetyltransferase activity	1/54	6/18337	0.017542	0.101867	0.0711094	ACAA2	1	54	6	18337	0.0185185	0.000327207	0.0176692
molecular_function	GO:0034338	short-chain carboxylesterase activity	1/54	6/18337	0.017542	0.101867	0.0711094	ABHD2	1	54	6	18337	0.0185185	0.000327207	0.0176692
molecular_function	GO:0030414	peptidase inhibitor activity	3/54	187/18337	0.0176927	0.101867	0.0711094	ITIH1/ITIH3/ITIH4	3	54	187	18337	0.0555556	0.010198	0.183563
molecular_function	GO:0061135	endopeptidase regulator activity	3/54	192/18337	0.0189631	0.104942	0.0732562	ITIH1/ITIH3/ITIH4	3	54	192	18337	0.0555556	0.0104706	0.188471
biological_process	GO:0009566	fertilization	3/55	194/18862	0.0190015	0.341355	0.313501	ABHD2/MFGE8/WDR48	3	55	194	18862	0.0545455	0.0102852	0.188563
biological_process	GO:1902806	regulation of cell cycle G1/S phase transition	3/55	195/18862	0.0192592	0.341355	0.313501	APC/CRADD/MYO16	3	55	195	18862	0.0545455	0.0103382	0.189535
molecular_function	GO:0005230	extracellular ligand-gated ion channel activity	2/54	73/18337	0.0195755	0.104942	0.0732562	GABRR1/GABRR2	2	54	73	18337	0.037037	0.00398102	0.107488
cellular_component	GO:0000775	chromosome, centromeric region	3/57	196/19520	0.019616	0.119663	0.0934548	APC/NCAPG/NUDCD2	3	57	196	19520	0.0526316	0.010041	0.190779
biological_process	GO:0046503	glycerolipid catabolic process	2/55	74/18862	0.0197199	0.341355	0.313501	ABHD2/LIPG	2	55	74	18862	0.0363636	0.00392323	0.107889
molecular_function	GO:0005254	chloride channel activity	2/54	74/18337	0.0200818	0.104942	0.0732562	GABRR1/GABRR2	2	54	74	18337	0.037037	0.00403556	0.10896
biological_process	GO:0010982	regulation of high-density lipoprotein particle clearance	1/55	7/18862	0.0202369	0.341355	0.313501	LIPG	1	55	7	18862	0.0181818	0.000371117	0.0204114
biological_process	GO:0035795	negative regulation of mitochondrial membrane permeability	1/55	7/18862	0.0202369	0.341355	0.313501	ACAA2	1	55	7	18862	0.0181818	0.000371117	0.0204114
biological_process	GO:0098914	membrane repolarization during atrial cardiac muscle cell action potential	1/55	7/18862	0.0202369	0.341355	0.313501	KCNJ5	1	55	7	18862	0.0181818	0.000371117	0.0204114
biological_process	GO:1903003	positive regulation of protein deubiquitination	1/55	7/18862	0.0202369	0.341355	0.313501	WDR48	1	55	7	18862	0.0181818	0.000371117	0.0204114
biological_process	GO:1904141	positive regulation of microglial cell migration	1/55	7/18862	0.0202369	0.341355	0.313501	CX3CR1	1	55	7	18862	0.0181818	0.000371117	0.0204114
biological_process	GO:1904781	positive regulation of protein localization to centrosome	1/55	7/18862	0.0202369	0.341355	0.313501	APC	1	55	7	18862	0.0181818	0.000371117	0.0204114
cellular_component	GO:0030991	intraciliary transport particle A	1/57	7/19520	0.0202655	0.119663	0.0934548	TTC21A	1	57	7	19520	0.0175439	0.000358607	0.0204406
cellular_component	GO:0048179	activin receptor complex	1/57	7/19520	0.0202655	0.119663	0.0934548	ACVR1C	1	57	7	19520	0.0175439	0.000358607	0.0204406
molecular_function	GO:0003988	acetyl-CoA C-acyltransferase activity	1/54	7/18337	0.0204361	0.104942	0.0732562	ACAA2	1	54	7	18337	0.0185185	0.000381742	0.0206141
biological_process	GO:0032119	sequestering of zinc ion	1/55	8/18862	0.0230949	0.344114	0.316035	SLC30A8	1	55	8	18862	0.0181818	0.000424133	0.0233273
biological_process	GO:0035425	autocrine signaling	1/55	8/18862	0.0230949	0.344114	0.316035	CX3CR1	1	55	8	18862	0.0181818	0.000424133	0.0233273
biological_process	GO:1901029	negative regulation of mitochondrial outer membrane permeabilization involved in apoptotic signaling pathway	1/55	8/18862	0.0230949	0.344114	0.316035	ACAA2	1	55	8	18862	0.0181818	0.000424133	0.0233273
biological_process	GO:1901164	negative regulation of trophoblast cell migration	1/55	8/18862	0.0230949	0.344114	0.316035	ACVR1C	1	55	8	18862	0.0181818	0.000424133	0.0233273
biological_process	GO:1903719	regulation of I-kappaB phosphorylation	1/55	8/18862	0.0230949	0.344114	0.316035	CX3CR1	1	55	8	18862	0.0181818	0.000424133	0.0233273
biological_process	GO:1904124	microglial cell migration	1/55	8/18862	0.0230949	0.344114	0.316035	CX3CR1	1	55	8	18862	0.0181818	0.000424133	0.0233273
biological_process	GO:1904139	regulation of microglial cell migration	1/55	8/18862	0.0230949	0.344114	0.316035	CX3CR1	1	55	8	18862	0.0181818	0.000424133	0.0233273
cellular_component	GO:0000796	condensin complex	1/57	8/19520	0.0231274	0.130354	0.101805	NCAPG	1	57	8	19520	0.0175439	0.000409836	0.0233607
molecular_function	GO:0051015	actin filament binding	3/54	208/18337	0.0233619	0.11681	0.0815403	MYO16/MYO5B/XIRP1	3	54	208	18337	0.0555556	0.0113432	0.204177
biological_process	GO:0042487	regulation of odontogenesis of dentin-containing tooth	1/55	9/18862	0.0259447	0.367795	0.337784	TNFRSF11B	1	55	9	18862	0.0181818	0.00047715	0.0262432
biological_process	GO:0050774	negative regulation of dendrite morphogenesis	1/55	9/18862	0.0259447	0.367795	0.337784	GORASP1	1	55	9	18862	0.0181818	0.00047715	0.0262432
molecular_function	GO:0005253	anion channel activity	2/54	86/18337	0.0265739	0.125523	0.0876227	GABRR1/GABRR2	2	54	86	18337	0.037037	0.00468997	0.126629
molecular_function	GO:0005249	voltage-gated potassium channel activity	2/54	87/18337	0.0271486	0.125523	0.0876227	KCNJ1/KCNJ5	2	54	87	18337	0.037037	0.00474451	0.128102
cellular_component	GO:0008076	voltage-gated potassium channel complex	2/57	89/19520	0.0278955	0.142572	0.111347	KCNJ1/KCNJ5	2	57	89	19520	0.0350877	0.00455943	0.129944
biological_process	GO:0010986	positive regulation of lipoprotein particle clearance	1/55	10/18862	0.0287863	0.367795	0.337784	LIPG	1	55	10	18862	0.0181818	0.000530166	0.0291592
biological_process	GO:1904779	regulation of protein localization to centrosome	1/55	10/18862	0.0287863	0.367795	0.337784	APC	1	55	10	18862	0.0181818	0.000530166	0.0291592
biological_process	GO:1905709	negative regulation of membrane permeability	1/55	10/18862	0.0287863	0.367795	0.337784	ACAA2	1	55	10	18862	0.0181818	0.000530166	0.0291592
cellular_component	GO:0045179	apical cortex	1/57	10/19520	0.0288266	0.142572	0.111347	MYO5B	1	57	10	19520	0.0175439	0.000512295	0.0292008
molecular_function	GO:0008429	phosphatidylethanolamine binding	1/54	10/18337	0.0290685	0.125523	0.0876227	MFGE8	1	54	10	18337	0.0185185	0.000545345	0.0294487
molecular_function	GO:0017002	activin-activated receptor activity	1/54	10/18337	0.0290685	0.125523	0.0876227	ACVR1C	1	54	10	18337	0.0185185	0.000545345	0.0294487
molecular_function	GO:0052740	1-acyl-2-lysophosphatidylserine acylhydrolase activity	1/54	10/18337	0.0290685	0.125523	0.0876227	LIPG	1	54	10	18337	0.0185185	0.000545345	0.0294487
molecular_function	GO:1990226	histone methyltransferase binding	1/54	10/18337	0.0290685	0.125523	0.0876227	LCORL	1	54	10	18337	0.0185185	0.000545345	0.0294487
biological_process	GO:0044242	cellular lipid catabolic process	3/55	230/18862	0.0295101	0.367795	0.337784	ABHD2/ACAA2/LIPG	3	55	230	18862	0.0545455	0.0121938	0.223554
molecular_function	GO:0061134	peptidase regulator activity	3/54	230/18337	0.0302418	0.126387	0.0882257	ITIH1/ITIH3/ITIH4	3	54	230	18337	0.0555556	0.0125429	0.225773
biological_process	GO:0048635	negative regulation of muscle organ development	1/55	11/18862	0.0316198	0.367795	0.337784	SFMBT1	1	55	11	18862	0.0181818	0.000583183	0.0320751
biological_process	GO:0098883	synapse pruning	1/55	11/18862	0.0316198	0.367795	0.337784	CX3CR1	1	55	11	18862	0.0181818	0.000583183	0.0320751
biological_process	GO:0099624	atrial cardiac muscle cell membrane repolarization	1/55	11/18862	0.0316198	0.367795	0.337784	KCNJ5	1	55	11	18862	0.0181818	0.000583183	0.0320751
biological_process	GO:1902287	semaphorin-plexin signaling pathway involved in axon guidance	1/55	11/18862	0.0316198	0.367795	0.337784	PLXNC1	1	55	11	18862	0.0181818	0.000583183	0.0320751
cellular_component	GO:0002116	semaphorin receptor complex	1/57	11/19520	0.031664	0.142572	0.111347	PLXNC1	1	57	11	19520	0.0175439	0.000563525	0.0321209
cellular_component	GO:0035253	ciliary rootlet	1/57	11/19520	0.031664	0.142572	0.111347	NEK4	1	57	11	19520	0.0175439	0.000563525	0.0321209
cellular_component	GO:0097524	sperm plasma membrane	1/57	11/19520	0.031664	0.142572	0.111347	ABHD2	1	57	11	19520	0.0175439	0.000563525	0.0321209
molecular_function	GO:0004724	magnesium-dependent protein serine/threonine phosphatase activity	1/54	11/18337	0.0319293	0.126387	0.0882257	PPM1L	1	54	11	18337	0.0185185	0.00059988	0.0323935
molecular_function	GO:0052739	phosphatidylserine 1-acylhydrolase activity	1/54	11/18337	0.0319293	0.126387	0.0882257	LIPG	1	54	11	18337	0.0185185	0.00059988	0.0323935
molecular_function	GO:0070513	death domain binding	1/54	11/18337	0.0319293	0.126387	0.0882257	CRADD	1	54	11	18337	0.0185185	0.00059988	0.0323935
biological_process	GO:1902476	chloride transmembrane transport	2/55	96/18862	0.0319686	0.367795	0.337784	GABRR1/GABRR2	2	55	96	18862	0.0363636	0.0050896	0.139964
biological_process	GO:0098659	inorganic cation import across plasma membrane	2/55	97/18862	0.0325817	0.367795	0.337784	KCNJ1/KCNJ5	2	55	97	18862	0.0363636	0.00514261	0.141422
biological_process	GO:0099587	inorganic ion import across plasma membrane	2/55	97/18862	0.0325817	0.367795	0.337784	KCNJ1/KCNJ5	2	55	97	18862	0.0363636	0.00514261	0.141422
cellular_component	GO:0034705	potassium channel complex	2/57	99/19520	0.0339241	0.142572	0.111347	KCNJ1/KCNJ5	2	57	99	19520	0.0350877	0.00507172	0.144544
biological_process	GO:0001867	complement activation, lectin pathway	1/55	12/18862	0.0344451	0.367795	0.337784	COLEC10	1	55	12	18862	0.0181818	0.0006362	0.034991
biological_process	GO:0006465	signal peptide processing	1/55	12/18862	0.0344451	0.367795	0.337784	SPCS1	1	55	12	18862	0.0181818	0.0006362	0.034991
biological_process	GO:0072520	seminiferous tubule development	1/55	12/18862	0.0344451	0.367795	0.337784	WDR48	1	55	12	18862	0.0181818	0.0006362	0.034991
biological_process	GO:0090085	regulation of protein deubiquitination	1/55	12/18862	0.0344451	0.367795	0.337784	WDR48	1	55	12	18862	0.0181818	0.0006362	0.034991
biological_process	GO:1900272	negative regulation of long-term synaptic potentiation	1/55	12/18862	0.0344451	0.367795	0.337784	CX3CR1	1	55	12	18862	0.0181818	0.0006362	0.034991
cellular_component	GO:0030877	beta-catenin destruction complex	1/57	12/19520	0.0344932	0.142572	0.111347	APC	1	57	12	19520	0.0175439	0.000614754	0.035041
cellular_component	GO:1990909	Wnt signalosome	1/57	12/19520	0.0344932	0.142572	0.111347	APC	1	57	12	19520	0.0175439	0.000614754	0.035041
biological_process	GO:0010951	negative regulation of endopeptidase activity	3/55	245/18862	0.0346326	0.367795	0.337784	ITIH1/ITIH3/ITIH4	3	55	245	18862	0.0545455	0.0129891	0.238133
molecular_function	GO:0008970	phospholipase A1 activity	1/54	12/18337	0.0347819	0.127088	0.0887149	LIPG	1	54	12	18337	0.0185185	0.000654415	0.0353384
molecular_function	GO:0017154	semaphorin receptor activity	1/54	12/18337	0.0347819	0.127088	0.0887149	PLXNC1	1	54	12	18337	0.0185185	0.000654415	0.0353384
molecular_function	GO:0045295	gamma-catenin binding	1/54	12/18337	0.0347819	0.127088	0.0887149	APC	1	54	12	18337	0.0185185	0.000654415	0.0353384
molecular_function	GO:1902282	voltage-gated potassium channel activity involved in ventricular cardiac muscle cell action potential repolarization	1/54	12/18337	0.0347819	0.127088	0.0887149	KCNJ5	1	54	12	18337	0.0185185	0.000654415	0.0353384
biological_process	GO:0000079	regulation of cyclin-dependent protein serine/threonine kinase activity	2/55	101/18862	0.0350798	0.367795	0.337784	APC/CCNG1	2	55	101	18862	0.0363636	0.00535468	0.147254
molecular_function	GO:0015108	chloride transmembrane transporter activity	2/54	101/18337	0.0357073	0.12766	0.0891146	GABRR1/GABRR2	2	54	101	18337	0.037037	0.00550799	0.148716
biological_process	GO:1901991	negative regulation of mitotic cell cycle phase transition	3/55	250/18862	0.0364364	0.367795	0.337784	APC/CRADD/MYO16	3	55	250	18862	0.0545455	0.0132542	0.242993
biological_process	GO:0016024	CDP-diacylglycerol biosynthetic process	1/55	13/18862	0.0372624	0.367795	0.337784	AGPAT4	1	55	13	18862	0.0181818	0.000689216	0.0379069
biological_process	GO:0031274	positive regulation of pseudopodium assembly	1/55	13/18862	0.0372624	0.367795	0.337784	APC	1	55	13	18862	0.0181818	0.000689216	0.0379069
biological_process	GO:0046341	CDP-diacylglycerol metabolic process	1/55	13/18862	0.0372624	0.367795	0.337784	AGPAT4	1	55	13	18862	0.0181818	0.000689216	0.0379069
biological_process	GO:0051988	regulation of attachment of spindle microtubules to kinetochore	1/55	13/18862	0.0372624	0.367795	0.337784	APC	1	55	13	18862	0.0181818	0.000689216	0.0379069
biological_process	GO:1902285	semaphorin-plexin signaling pathway involved in neuron projection guidance	1/55	13/18862	0.0372624	0.367795	0.337784	PLXNC1	1	55	13	18862	0.0181818	0.000689216	0.0379069
biological_process	GO:1903977	positive regulation of glial cell migration	1/55	13/18862	0.0372624	0.367795	0.337784	CX3CR1	1	55	13	18862	0.0181818	0.000689216	0.0379069
biological_process	GO:1904668	positive regulation of ubiquitin protein ligase activity	1/55	13/18862	0.0372624	0.367795	0.337784	GORASP1	1	55	13	18862	0.0181818	0.000689216	0.0379069
molecular_function	GO:0005216	ion channel activity	4/54	429/18337	0.0373348	0.12766	0.0891146	GABRR1/GABRR2/KCNJ1/KCNJ5	4	54	429	18337	0.0740741	0.0233953	0.315837
molecular_function	GO:0047372	acylglycerol lipase activity	1/54	13/18337	0.0376262	0.12766	0.0891146	ABHD2	1	54	13	18337	0.0185185	0.000708949	0.0382833
molecular_function	GO:0102991	myristoyl-CoA hydrolase activity	1/54	13/18337	0.0376262	0.12766	0.0891146	ACAA2	1	54	13	18337	0.0185185	0.000708949	0.0382833
biological_process	GO:1904029	regulation of cyclin-dependent protein kinase activity	2/55	105/18862	0.0376502	0.367795	0.337784	APC/CCNG1	2	55	105	18862	0.0363636	0.00556675	0.153086
cellular_component	GO:0061695	transferase complex, transferring phosphorus-containing groups	3/57	253/19520	0.0377151	0.15086	0.11782	ACVR1C/CCNG1/PHKA1	3	57	253	19520	0.0526316	0.0129611	0.24626
biological_process	GO:0009062	fatty acid catabolic process	2/55	106/18862	0.0383038	0.367795	0.337784	ABHD2/ACAA2	2	55	106	18862	0.0363636	0.00561976	0.154544
biological_process	GO:1901990	regulation of mitotic cell cycle phase transition	4/55	439/18862	0.0389262	0.367795	0.337784	APC/CRADD/HMMR/MYO16	4	55	439	18862	0.0727273	0.0232743	0.320022
biological_process	GO:0010466	negative regulation of peptidase activity	3/55	257/18862	0.0390421	0.367795	0.337784	ITIH1/ITIH3/ITIH4	3	55	257	18862	0.0545455	0.0136253	0.249797
biological_process	GO:0031272	regulation of pseudopodium assembly	1/55	14/18862	0.0400716	0.367795	0.337784	APC	1	55	14	18862	0.0181818	0.000742233	0.0408228
biological_process	GO:0035721	intraciliary retrograde transport	1/55	14/18862	0.0400716	0.367795	0.337784	TTC21A	1	55	14	18862	0.0181818	0.000742233	0.0408228
biological_process	GO:0051791	medium-chain fatty acid metabolic process	1/55	14/18862	0.0400716	0.367795	0.337784	ABHD2	1	55	14	18862	0.0181818	0.000742233	0.0408228
biological_process	GO:1905168	positive regulation of double-strand break repair via homologous recombination	1/55	14/18862	0.0400716	0.367795	0.337784	WDR48	1	55	14	18862	0.0181818	0.000742233	0.0408228
biological_process	GO:0006821	chloride transport	2/55	109/18862	0.0402908	0.367795	0.337784	GABRR1/GABRR2	2	55	109	18862	0.0363636	0.00577881	0.158917
molecular_function	GO:0016290	palmitoyl-CoA hydrolase activity	1/54	14/18337	0.0404622	0.13433	0.0937706	ACAA2	1	54	14	18337	0.0185185	0.000763484	0.0412281
molecular_function	GO:0099094	ligand-gated cation channel activity	2/54	109/18337	0.041006	0.13433	0.0937706	KCNJ1/KCNJ5	2	54	109	18337	0.037037	0.00594427	0.160495
molecular_function	GO:0030594	neurotransmitter receptor activity	2/54	111/18337	0.0423746	0.134838	0.0941252	GABRR1/GABRR2	2	54	111	18337	0.037037	0.00605333	0.16344
biological_process	GO:0007076	mitotic chromosome condensation	1/55	15/18862	0.0428727	0.367795	0.337784	NCAPG	1	55	15	18862	0.0181818	0.00079525	0.0437387
biological_process	GO:0042481	regulation of odontogenesis	1/55	15/18862	0.0428727	0.367795	0.337784	TNFRSF11B	1	55	15	18862	0.0181818	0.00079525	0.0437387
biological_process	GO:0046500	S-adenosylmethionine metabolic process	1/55	15/18862	0.0428727	0.367795	0.337784	MAT2B	1	55	15	18862	0.0181818	0.00079525	0.0437387
biological_process	GO:0050746	regulation of lipoprotein metabolic process	1/55	15/18862	0.0428727	0.367795	0.337784	LIPG	1	55	15	18862	0.0181818	0.00079525	0.0437387
biological_process	GO:0055091	phospholipid homeostasis	1/55	15/18862	0.0428727	0.367795	0.337784	LIPG	1	55	15	18862	0.0181818	0.00079525	0.0437387
biological_process	GO:1901163	regulation of trophoblast cell migration	1/55	15/18862	0.0428727	0.367795	0.337784	ACVR1C	1	55	15	18862	0.0181818	0.00079525	0.0437387
molecular_function	GO:0016805	dipeptidase activity	1/54	15/18337	0.0432901	0.134838	0.0941252	PM20D2	1	54	15	18337	0.0185185	0.000818018	0.044173
molecular_function	GO:0086008	voltage-gated potassium channel activity involved in cardiac muscle cell action potential repolarization	1/54	15/18337	0.0432901	0.134838	0.0941252	KCNJ5	1	54	15	18337	0.0185185	0.000818018	0.044173
biological_process	GO:1901988	negative regulation of cell cycle phase transition	3/55	268/18862	0.0433246	0.367795	0.337784	APC/CRADD/MYO16	3	55	268	18862	0.0545455	0.0142085	0.260488
biological_process	GO:0031269	pseudopodium assembly	1/55	16/18862	0.0456659	0.367795	0.337784	APC	1	55	16	18862	0.0181818	0.000848266	0.0466546
biological_process	GO:0034384	high-density lipoprotein particle clearance	1/55	16/18862	0.0456659	0.367795	0.337784	LIPG	1	55	16	18862	0.0181818	0.000848266	0.0466546
biological_process	GO:0035855	megakaryocyte development	1/55	16/18862	0.0456659	0.367795	0.337784	FLI1	1	55	16	18862	0.0181818	0.000848266	0.0466546
biological_process	GO:0045779	negative regulation of bone resorption	1/55	16/18862	0.0456659	0.367795	0.337784	TNFRSF11B	1	55	16	18862	0.0181818	0.000848266	0.0466546
biological_process	GO:0051238	sequestering of metal ion	1/55	16/18862	0.0456659	0.367795	0.337784	SLC30A8	1	55	16	18862	0.0181818	0.000848266	0.0466546
biological_process	GO:0061450	trophoblast cell migration	1/55	16/18862	0.0456659	0.367795	0.337784	ACVR1C	1	55	16	18862	0.0181818	0.000848266	0.0466546
biological_process	GO:0098915	membrane repolarization during ventricular cardiac muscle cell action potential	1/55	16/18862	0.0456659	0.367795	0.337784	KCNJ5	1	55	16	18862	0.0181818	0.000848266	0.0466546
cellular_component	GO:0000779	condensed chromosome, centromeric region	2/57	117/19520	0.0459099	0.177901	0.138938	NCAPG/NUDCD2	2	57	117	19520	0.0350877	0.00599385	0.170825
molecular_function	GO:0003841	1-acylglycerol-3-phosphate O-acyltransferase activity	1/54	16/18337	0.0461098	0.141304	0.0986389	AGPAT4	1	54	16	18337	0.0185185	0.000872553	0.0471178
biological_process	GO:0000082	G1/S transition of mitotic cell cycle	3/55	275/18862	0.046168	0.36852	0.33845	APC/CRADD/MYO16	3	55	275	18862	0.0545455	0.0145796	0.267292
biological_process	GO:0098661	inorganic anion transmembrane transport	2/55	120/18862	0.0478992	0.370381	0.340159	GABRR1/GABRR2	2	55	120	18862	0.0363636	0.006362	0.174955
biological_process	GO:0031268	pseudopodium organization	1/55	17/18862	0.048451	0.370381	0.340159	APC	1	55	17	18862	0.0181818	0.000901283	0.0495706
molecular_function	GO:0005267	potassium channel activity	2/54	120/18337	0.0487406	0.144699	0.101008	KCNJ1/KCNJ5	2	54	120	18337	0.037037	0.00654415	0.176692
molecular_function	GO:0051082	unfolded protein binding	2/54	120/18337	0.0487406	0.144699	0.101008	NUDCD2/SRSF12	2	54	120	18337	0.037037	0.00654415	0.176692

## Sheet: The top 30 GO terms
Table S6 The top 30 GO terms of functional enrichment analysis
Term	Enrichment	pvalue	Count	ONTOLOGY
hyaluronan metabolic process	0.0284302	4.93251e-06	4	biological_process
glycosaminoglycan metabolic process	0.0921429	9.60477e-05	5	biological_process
aminoglycan metabolic process	0.100307	0.000143126	5	biological_process
mucopolysaccharide metabolic process	0.0838326	0.000351867	4	biological_process
skeletal system development	0.202448	0.000502879	7	biological_process
gamma-aminobutyric acid signaling pathway	0.0393649	0.0027964	2	biological_process
multiple spine synapse organization	0.00291592	0.00291592	1	biological_process
multiple spine synapse organization, single dendrite	0.00291592	0.00291592	1	biological_process
negative regulation of G1/S transition of mitotic cell cycle	0.115665	0.00505951	3	biological_process
negative regulation of cell cycle G1/S phase transition	0.120525	0.00567203	3	biological_process
platelet dense granule lumen	0.0204406	0.00074538	2	cellular_component
GABA-A receptor complex	0.0277408	0.00138759	2	cellular_component
GABA receptor complex	0.0292008	0.00153888	2	cellular_component
platelet dense granule	0.0306609	0.00169768	2	cellular_component
serine/threonine protein kinase complex	0.0866291	0.00224409	3	cellular_component
protein kinase complex	0.10123	0.00348911	3	cellular_component
catenin complex	0.0467213	0.00392806	2	cellular_component
methionine adenosyltransferase complex	0.00584016	0.00583179	1	cellular_component
blood microparticle	0.142111	0.00893125	3	cellular_component
chloride channel complex	0.073002	0.00938094	2	cellular_component
ligand-gated ion channel activity	0.102334	0.000745364	4	molecular_function
ligand-gated channel activity	0.102334	0.000745364	4	molecular_function
GABA-A receptor activity	0.0279762	0.00140956	2	molecular_function
inward rectifier potassium channel activity	0.0323935	0.00189339	2	molecular_function
GABA receptor activity	0.0323935	0.00189339	2	molecular_function
C-X3-C chemokine receptor activity	0.00294487	0.00294487	1	molecular_function
methionine adenosyltransferase regulator activity	0.00294487	0.00294487	1	molecular_function
serine-type endopeptidase inhibitor activity	0.0961989	0.00301378	3	molecular_function
hormone-sensitive lipase activity	0.00588973	0.00588122	1	molecular_function
transmitter-gated ion channel activity involved in regulation of postsynaptic membrane potential	0.064787	0.00743956	2	molecular_function
