# Supplementary material for: Identification and Characterization of lncRNAs Expression Profile Related to Goat Skeletal Muscle at Different Development Stages
Source: Animals (Basel). 2022 Oct 6;12(19):2683. doi: 10.3390/ani12192683 (PMC9558979; doi:10.3390/ani12192683)
Supplement: Supplementary file 1 [file animals-12-02683-s001.zip › Supplementary TableS7.xls]

## Sheet: 1 month VS 9 months KEGG 
Table S7 KEGG analysis of protein-coding genes co-located with lncRNAs
ID	Description	GeneRatio	BgRatio	pvalue	p.adjust	qvalue	gene
hsa00561	Glycerolipid metabolism	44285	88/11060	0.00169184	0.0964348	0.0658926	Q9NRZ5/Q9Y5X9/A0A024R2B5
hsa00062	Fatty acid elongation	2/30	37/11060	0.00446586	0.103335	0.0706071	B3KNP8/P42765
hsa05032	Morphine addiction	44285	136/11060	0.00579228	0.103335	0.0706071	P24046/P28476/P48544
hsa05033	Nicotine addiction	2/30	55/11060	0.00966127	0.103335	0.0706071	P24046/P28476
hsa04960	Aldosterone-regulated sodium reabsorption	2/30	56/11060	0.0100023	0.103335	0.0706071	A8K432/P48048
hsa03460	Fanconi anemia pathway	2/30	72/11060	0.0161625	0.103335	0.0706071	Q8TAF3/A0A024R2L1
hsa00071	Fatty acid degradation	2/30	73/11060	0.01659	0.103335	0.0706071	B3KNP8/P42765
hsa04550	Signaling pathways regulating pluripotency of stem cells	44285	205/11060	0.0176338	0.103335	0.0706071	Q8NER5/P25054/Q4LE70
hsa00280	Valine, leucine and isoleucine degradation	2/30	77/11060	0.0183481	0.103335	0.0706071	B3KNP8/P42765
hsa04979	Cholesterol metabolism	2/30	78/11060	0.0187995	0.103335	0.0706071	Q9Y5X9/A0A024R2B5
hsa00270	Cysteine and methionine metabolism	2/30	81/11060	0.0201818	0.103335	0.0706071	A0A140VJP2/Q9NZL9
hsa04723	Retrograde endocannabinoid signaling	44285	223/11060	0.0219971	0.103335	0.0706071	P24046/P28476/P48544
hsa05217	Basal cell carcinoma	2/30	88/11060	0.0235675	0.103335	0.0706071	P25054/Q4LE70
hsa01212	Fatty acid metabolism	2/30	93/11060	0.0261193	0.106343	0.0726628	B3KNP8/P42765
hsa05213	Endometrial cancer	2/30	98/11060	0.0287787	0.108572	0.0741859	P25054/Q4LE70
hsa05206	MicroRNAs in cancer	44285	253/11060	0.0304764	0.108572	0.0741859	P25054/Q4LE70/P51959
hsa04971	Gastric acid secretion	2/30	114/11060	0.0379752	0.127329	0.087002	A8K432/P48048
hsa01230	Biosynthesis of amino acids	2/30	119/11060	0.0410526	0.13	0.0888272	A0A140VJP2/Q9NZL9
hsa04512	ECM-receptor interaction	2/30	130/11060	0.0481418	0.141007	0.0963483	O75330/P21815
hsa04727	GABAergic synapse	2/30	132/11060	0.0494762	0.141007	0.0963483	P24046/P28476
hsa05210	Colorectal cancer	2/30	143/11060	0.0570519	0.154855	0.105811	P25054/Q4LE70
hsa03060	Protein export	44226	35/11060	0.0908201	0.231594	0.158245	Q9Y6A9
hsa04060	Cytokine-cytokine receptor interaction	44285	401/11060	0.0934502	0.231594	0.158245	Q8NER5/P49238/O00300
hsa05224	Breast cancer	2/30	203/11060	0.104383	0.247911	0.169394	P25054/Q4LE70
hsa05226	Gastric cancer	2/30	220/11060	0.119285	0.268153	0.183225	P25054/Q4LE70
hsa01240	Biosynthesis of cofactors	2/30	224/11060	0.122868	0.268153	0.183225	A0A140VJP2/Q9NZL9
hsa04390	Hippo signaling pathway	2/30	234/11060	0.131943	0.268153	0.183225	P25054/Q4LE70
hsa04934	Cushing syndrome	2/30	244/11060	0.141172	0.268153	0.183225	P25054/Q4LE70
hsa04310	Wnt signaling pathway	2/30	245/11060	0.142103	0.268153	0.183225	P25054/Q4LE70
hsa05165	Human papillomavirus infection	44285	485/11060	0.142598	0.268153	0.183225	P25054/Q4LE70/P21815
hsa05202	Transcriptional misregulation in cancer	2/30	253/11060	0.149599	0.268153	0.183225	Q01543/A0A024R3M5
hsa05225	Hepatocellular carcinoma	2/30	254/11060	0.150542	0.268153	0.183225	P25054/Q4LE70
hsa05130	Pathogenic Escherichia coli infection	2/30	285/11060	0.180343	0.311501	0.212844	Q7Z7A5/Q9ULV0
hsa04810	Regulation of actin cytoskeleton	2/30	340/11060	0.235129	0.384667	0.262838	P25054/Q4LE70
hsa04929	GnRH secretion	44226	100/11060	0.238786	0.384667	0.262838	P48544
hsa04115	p53 signaling pathway	44226	102/11060	0.242948	0.384667	0.262838	P51959
hsa00564	Glycerophospholipid metabolism	44226	132/11060	0.302796	0.461598	0.315404	Q9NRZ5
hsa04061	Viral protein interaction with cytokine and cytokine receptor	44226	136/11060	0.310421	0.461598	0.315404	P49238
hsa04350	TGF-beta signaling pathway	44226	142/11060	0.321709	0.461598	0.315404	Q8NER5
hsa03013	Nucleocytoplasmic transport	44226	144/11060	0.325431	0.461598	0.315404	O00629
hsa04713	Circadian entrainment	44226	152/11060	0.340125	0.461598	0.315404	P48544
hsa04925	Aldosterone synthesis and secretion	44226	152/11060	0.340125	0.461598	0.315404	P48544
hsa04922	Glucagon signaling pathway	44226	160/11060	0.354509	0.469931	0.321098	P46020
hsa04080	Neuroactive ligand-receptor interaction	2/30	476/11060	0.372408	0.477837	0.3265	P24046/P28476
hsa04726	Serotonergic synapse	44226	173/11060	0.37724	0.477837	0.3265	P48544
hsa04380	Osteoclast differentiation	44226	179/11060	0.387468	0.480123	0.328062	O00300
hsa04910	Insulin signaling pathway	44226	205/11060	0.429944	0.514295	0.351411	P46020
hsa04728	Dopaminergic synapse	44226	207/11060	0.43309	0.514295	0.351411	P48544
hsa04915	Estrogen signaling pathway	44226	214/11060	0.443972	0.516457	0.352889	P48544
hsa04072	Phospholipase D signaling pathway	44226	227/11060	0.463648	0.524808	0.358595	Q9NRZ5
hsa04921	Oxytocin signaling pathway	44226	231/11060	0.469565	0.524808	0.358595	P48544
hsa04360	Axon guidance	44226	268/11060	0.521393	0.571527	0.390517	O60486
hsa04062	Chemokine signaling pathway	44226	289/11060	0.548593	0.589997	0.403137	P49238
hsa05207	Chemical carcinogenesis - receptor activation	44226	307/11060	0.570714	0.60242	0.411626	O00629
hsa04510	Focal adhesion	44226	320/11060	0.586034	0.607344	0.414991	P21815
hsa04020	Calcium signaling pathway	44226	350/11060	0.619398	0.630459	0.430784	P46020
hsa05132	Salmonella infection	44226	369/11060	0.639168	0.639168	0.436735	O00629

## Sheet: The top 20 KEGG 
Table S6 The top 20 KEGG pathways of Functional enrichment analysis
ID	Description	GeneRatio	BgRatio	pvalue	p.adjust	qvalue	gene
hsa00561	Glycerolipid metabolism	2021-03-30	88/11060	0.00169184	0.0964348	0.0658926	Q9NRZ5/Q9Y5X9/A0A024R2B5
hsa00062	Fatty acid elongation	2/30	37/11060	0.00446586	0.103335	0.0706071	B3KNP8/P42765
hsa05032	Morphine addiction	2021-03-30	136/11060	0.00579228	0.103335	0.0706071	P24046/P28476/P48544
hsa05033	Nicotine addiction	2/30	55/11060	0.00966127	0.103335	0.0706071	P24046/P28476
hsa04960	Aldosterone-regulated sodium reabsorption	2/30	56/11060	0.0100023	0.103335	0.0706071	A8K432/P48048
hsa03460	Fanconi anemia pathway	2/30	72/11060	0.0161625	0.103335	0.0706071	Q8TAF3/A0A024R2L1
hsa00071	Fatty acid degradation	2/30	73/11060	0.01659	0.103335	0.0706071	B3KNP8/P42765
hsa04550	Signaling pathways regulating pluripotency of stem cells	2021-03-30	205/11060	0.0176338	0.103335	0.0706071	Q8NER5/P25054/Q4LE70
hsa00280	Valine, leucine and isoleucine degradation	2/30	77/11060	0.0183481	0.103335	0.0706071	B3KNP8/P42765
hsa04979	Cholesterol metabolism	2/30	78/11060	0.0187995	0.103335	0.0706071	Q9Y5X9/A0A024R2B5
hsa00270	Cysteine and methionine metabolism	2/30	81/11060	0.0201818	0.103335	0.0706071	A0A140VJP2/Q9NZL9
hsa04723	Retrograde endocannabinoid signaling	2021-03-30	223/11060	0.0219971	0.103335	0.0706071	P24046/P28476/P48544
hsa05217	Basal cell carcinoma	2/30	88/11060	0.0235675	0.103335	0.0706071	P25054/Q4LE70
hsa01212	Fatty acid metabolism	2/30	93/11060	0.0261193	0.106343	0.0726628	B3KNP8/P42765
hsa05213	Endometrial cancer	2/30	98/11060	0.0287787	0.108572	0.0741859	P25054/Q4LE70
hsa05206	MicroRNAs in cancer	2021-03-30	253/11060	0.0304764	0.108572	0.0741859	P25054/Q4LE70/P51959
hsa04971	Gastric acid secretion	2/30	114/11060	0.0379752	0.127329	0.087002	A8K432/P48048
hsa01230	Biosynthesis of amino acids	2/30	119/11060	0.0410526	0.13	0.0888272	A0A140VJP2/Q9NZL9
hsa04512	ECM-receptor interaction	2/30	130/11060	0.0481418	0.141007	0.0963483	O75330/P21815
hsa04727	GABAergic synapse	2/30	132/11060	0.0494762	0.141007	0.0963483	P24046/P28476
