# Supplementary material for: Identification and Characterization of lncRNAs Expression Profile Related to Goat Skeletal Muscle at Different Development Stages
Source: Animals (Basel). 2022 Oct 6;12(19):2683. doi: 10.3390/ani12192683 (PMC9558979; doi:10.3390/ani12192683)
Supplement: Supplementary file 1 [file animals-12-02683-s001.zip › Supplementary TableS8.xlsx]

## Sheet: co-expression
Table S8 Co-expression analysis between protein-coding genes and lncRNAs
lncRNA_ID	lncRNA_Gene_ID	lncRNA_Gene_Symbol	Status	mRNA_Gene_ID	mRNA_Gene_Symbol	Pearson_correlation	Pvalue
TCONS_00088675	100860822	CRSP-2	Novel_lncRNA	100860822	CRSP-2	1	0
TCONS_00085732	102184828	SLC30A8	Novel_lncRNA	102173832	RLN3	1	0
TCONS_00085732	102184828	SLC30A8	Novel_lncRNA	102181195	DMC1	1	0
TCONS_00085732	102184828	SLC30A8	Novel_lncRNA	102168535	LOC102168535	1	0
TCONS_00085732	102184828	SLC30A8	Novel_lncRNA	102175964	LOC102175964	1	0
TCONS_00085732	102184828	SLC30A8	Novel_lncRNA	102179409	KLK11	1	0
TCONS_00085732	102184828	SLC30A8	Novel_lncRNA	102183170	NPHS2	1	0
TCONS_00085732	102184828	SLC30A8	Novel_lncRNA	102177885	TLE6	1	0
TCONS_00085732	102184828	SLC30A8	Novel_lncRNA	102178571	GMNC	1	0
TCONS_00085732	102184828	SLC30A8	Novel_lncRNA	102177362	CES3	1	0
TCONS_00085732	102184828	SLC30A8	Novel_lncRNA	102179936	LOC102179936	1	0
TCONS_00085732	102184828	SLC30A8	Novel_lncRNA	102188254	LOC102188254	1	0
TCONS_00085732	102184828	SLC30A8	Novel_lncRNA	102186095	LMNTD2	1	0
TCONS_00085732	102184828	SLC30A8	Novel_lncRNA	102176804	ANKRD60	1	0
TCONS_00085732	102184828	SLC30A8	Novel_lncRNA	108633288	LOC108633288	1	0
TCONS_00085732	102184828	SLC30A8	Novel_lncRNA	102169312	OC90	1	0
TCONS_00085732	102184828	SLC30A8	Novel_lncRNA	108637736	OPN3	1	0
TCONS_00085732	102184828	SLC30A8	Novel_lncRNA	102175925	LOC102175925	1	0
TCONS_00085732	102184828	SLC30A8	Novel_lncRNA	108638237	LOC108638237	1	0
TCONS_00085732	102184828	SLC30A8	Novel_lncRNA	102178541	SLCO6A1	1	0
TCONS_00085732	102184828	SLC30A8	Novel_lncRNA	108638408	IRX4	1	0
TCONS_00085732	102184828	SLC30A8	Novel_lncRNA	102186556	LRGUK	1	0
TCONS_00085732	102184828	SLC30A8	Novel_lncRNA	102183203	LOC102183203	1	0
TCONS_00085732	102184828	SLC30A8	Novel_lncRNA	102172975	PIK3C2G	1	0
TCONS_00085732	102184828	SLC30A8	Novel_lncRNA	102174637	F9	1	0
TCONS_00085732	102184828	SLC30A8	Novel_lncRNA	108634850	LOC108634850	1	0
TCONS_00085732	102184828	SLC30A8	Novel_lncRNA	102183996	AGRP	1	0
TCONS_00085732	102184828	SLC30A8	Novel_lncRNA	102170234	LOC102170234	1	0
TCONS_00085732	102184828	SLC30A8	Novel_lncRNA	102183581	LOC102183581	1	0
TCONS_00085732	102184828	SLC30A8	Novel_lncRNA	102175286	LOC102175286	1	0
TCONS_00085732	102184828	SLC30A8	Novel_lncRNA	102174635	SLC22A18	1	0
TCONS_00085732	102184828	SLC30A8	Novel_lncRNA	102177037	TEX33	1	0
TCONS_00085732	102184828	SLC30A8	Novel_lncRNA	106502327	LOC106502327	1	0
TCONS_00085732	102184828	SLC30A8	Novel_lncRNA	108634074	LOC108634074	1	0
TCONS_00085732	102184828	SLC30A8	Novel_lncRNA	102179133	PPY	1	0
TCONS_00085732	102184828	SLC30A8	Novel_lncRNA	102180541	GRK7	1	0
TCONS_00085732	102184828	SLC30A8	Novel_lncRNA	102190774	LOC102190774	1	0
TCONS_00085732	102184828	SLC30A8	Novel_lncRNA	102171118	LOC102171118	1	0
TCONS_00085732	102184828	SLC30A8	Novel_lncRNA	102170557	DNMT3L	1	0
TCONS_00085732	102184828	SLC30A8	Novel_lncRNA	108638212	LOC108638212	1	0
TCONS_00085732	102184828	SLC30A8	Novel_lncRNA	102186860	TEX43	1	0
TCONS_00085732	102184828	SLC30A8	Novel_lncRNA	102175661	AWAT1	1	0
TCONS_00085732	102184828	SLC30A8	Novel_lncRNA	102175987	LOC102175987	1	0
TCONS_00085732	102184828	SLC30A8	Novel_lncRNA	108634508	LOC108634508	1	0
TCONS_00085732	102184828	SLC30A8	Novel_lncRNA	102186205	LOC102186205	1	0
TCONS_00085732	102184828	SLC30A8	Novel_lncRNA	102190989	B4GALNT2	1	0
TCONS_00085732	102184828	SLC30A8	Novel_lncRNA	102171649	RNF222	1	0
TCONS_00085732	102184828	SLC30A8	Novel_lncRNA	102179523	PCP4	1	0
TCONS_00085732	102184828	SLC30A8	Novel_lncRNA	102177323	MKRN3	1	0
TCONS_00085732	102184828	SLC30A8	Novel_lncRNA	102189435	SOX14	1	0
TCONS_00085732	102184828	SLC30A8	Novel_lncRNA	102189647	LIPK	1	0
TCONS_00085732	102184828	SLC30A8	Novel_lncRNA	102170996	LOC102170996	1	0
TCONS_00085732	102184828	SLC30A8	Novel_lncRNA	108636550	LOC108636550	1	0
TCONS_00085732	102184828	SLC30A8	Novel_lncRNA	106503767	LOC106503767	1	0
TCONS_00085732	102184828	SLC30A8	Novel_lncRNA	102190992	LOC102190992	1	0
TCONS_00085732	102184828	SLC30A8	Novel_lncRNA	102180138	TMEM74B	1	0
TCONS_00085732	102184828	SLC30A8	Novel_lncRNA	102169608	LOC102169608	1	0
TCONS_00085732	102184828	SLC30A8	Novel_lncRNA	102172230	LOC102172230	1	0
TCONS_00085732	102184828	SLC30A8	Novel_lncRNA	102171837	LOC102171837	1	0
TCONS_00085732	102184828	SLC30A8	Novel_lncRNA	102179983	MROH2B	1	0
TCONS_00085732	102184828	SLC30A8	Novel_lncRNA	102178106	KRT14	1	0
TCONS_00085732	102184828	SLC30A8	Novel_lncRNA	102180349	NKX2-5	1	0
TCONS_00085732	102184828	SLC30A8	Novel_lncRNA	102175416	NRSN2	1	0
TCONS_00085732	102184828	SLC30A8	Novel_lncRNA	102175572	LOC102175572	1	0
TCONS_00085732	102184828	SLC30A8	Novel_lncRNA	102181974	NPPA	1	0
TCONS_00085732	102184828	SLC30A8	Novel_lncRNA	108635390	LOC108635390	1	0
TCONS_00085732	102184828	SLC30A8	Novel_lncRNA	102181836	PLEKHS1	1	0
TCONS_00085732	102184828	SLC30A8	Novel_lncRNA	108635475	LOC108635475	1	0
TCONS_00085732	102184828	SLC30A8	Novel_lncRNA	108638246	LOC108638246	1	0
TCONS_00085732	102184828	SLC30A8	Novel_lncRNA	102184828	SLC30A8	1	0
TCONS_00085732	102184828	SLC30A8	Novel_lncRNA	100860913	IGFBP1	1	0
TCONS_00085732	102184828	SLC30A8	Novel_lncRNA	102180955	CCDC185	1	0
TCONS_00085732	102184828	SLC30A8	Novel_lncRNA	108636278	LOC108636278	1	0
TCONS_00085732	102184828	SLC30A8	Novel_lncRNA	102186722	ZBBX	1	0
TCONS_00085732	102184828	SLC30A8	Novel_lncRNA	102179077	TEX13B	1	0
TCONS_00085732	102184828	SLC30A8	Novel_lncRNA	108633268	LOC108633268	1	0
TCONS_00085732	102184828	SLC30A8	Novel_lncRNA	102176079	C1H21orf58	1	0
TCONS_00085732	102184828	SLC30A8	Novel_lncRNA	102180110	LOC102180110	1	0
TCONS_00085732	102184828	SLC30A8	Novel_lncRNA	102191070	CABP7	1	0
TCONS_00085732	102184828	SLC30A8	Novel_lncRNA	102191160	LOC102191160	1	0
TCONS_00085732	102184828	SLC30A8	Novel_lncRNA	102185710	MYL7	1	0
TCONS_00085732	102184828	SLC30A8	Novel_lncRNA	102186657	LOC102186657	1	1.84889e-32
TCONS_00085732	102184828	SLC30A8	Novel_lncRNA	102173783	LOC102173783	1	1.84889e-32
TCONS_00085732	102184828	SLC30A8	Novel_lncRNA	102170014	TNFRSF17	1	1.84889e-32
TCONS_00085732	102184828	SLC30A8	Novel_lncRNA	102187721	LYPD6B	1	1.84889e-32
TCONS_00085732	102184828	SLC30A8	Novel_lncRNA	106503958	LOC106503958	1	1.84889e-32
TCONS_00085732	102184828	SLC30A8	Novel_lncRNA	102171720	GJB2	1	1.84889e-32
TCONS_00085732	102184828	SLC30A8	Novel_lncRNA	102185156	LOC102185156	1	1.84889e-32
TCONS_00085732	102184828	SLC30A8	Novel_lncRNA	102173727	ZNF845	1	1.84889e-32
TCONS_00085732	102184828	SLC30A8	Novel_lncRNA	102187403	PRSS55	1	1.84889e-32
TCONS_00085732	102184828	SLC30A8	Novel_lncRNA	108637271	POU4F1	1	1.84889e-32
TCONS_00085732	102184828	SLC30A8	Novel_lncRNA	108636285	NKX3-2	1	1.84889e-32
TCONS_00085732	102184828	SLC30A8	Novel_lncRNA	108638450	LOC108638450	1	1.84889e-32
TCONS_00085732	102184828	SLC30A8	Novel_lncRNA	102181476	C29H11orf86	1	1.84889e-32
TCONS_00085732	102184828	SLC30A8	Novel_lncRNA	108637591	LOC108637591	1	1.84889e-32
TCONS_00085732	102184828	SLC30A8	Novel_lncRNA	102188467	TRIM67	1	7.39557e-32
TCONS_00085732	102184828	SLC30A8	Novel_lncRNA	102168316	ZG16	1	7.39557e-32
TCONS_00085732	102184828	SLC30A8	Novel_lncRNA	108637775	LOC108637775	1	7.39557e-32
TCONS_00085732	102184828	SLC30A8	Novel_lncRNA	102184387	CPO	1	7.39557e-32
TCONS_00085732	102184828	SLC30A8	Novel_lncRNA	102168282	TTLL10	1	7.39557e-32
TCONS_00085732	102184828	SLC30A8	Novel_lncRNA	102187559	LOC102187559	1	7.39557e-32
TCONS_00085732	102184828	SLC30A8	Novel_lncRNA	102180500	CPNE6	1	7.39557e-32
TCONS_00085732	102184828	SLC30A8	Novel_lncRNA	102170469	CCDC33	1	7.39557e-32
TCONS_00005111	XLOC_003282	XLOC_003282	Novel_lncRNA	102173832	RLN3	1	0
TCONS_00005111	XLOC_003282	XLOC_003282	Novel_lncRNA	102186657	LOC102186657	1	0
TCONS_00005111	XLOC_003282	XLOC_003282	Novel_lncRNA	102188467	TRIM67	1	0
TCONS_00005111	XLOC_003282	XLOC_003282	Novel_lncRNA	102181195	DMC1	1	0
TCONS_00005111	XLOC_003282	XLOC_003282	Novel_lncRNA	102168535	LOC102168535	1	0
TCONS_00005111	XLOC_003282	XLOC_003282	Novel_lncRNA	102173783	LOC102173783	1	0
TCONS_00005111	XLOC_003282	XLOC_003282	Novel_lncRNA	102175964	LOC102175964	1	0
TCONS_00005111	XLOC_003282	XLOC_003282	Novel_lncRNA	102179409	KLK11	1	0
TCONS_00005111	XLOC_003282	XLOC_003282	Novel_lncRNA	102183170	NPHS2	1	0
TCONS_00005111	XLOC_003282	XLOC_003282	Novel_lncRNA	102177885	TLE6	1	0
TCONS_00005111	XLOC_003282	XLOC_003282	Novel_lncRNA	102178571	GMNC	1	0
TCONS_00005111	XLOC_003282	XLOC_003282	Novel_lncRNA	102177362	CES3	1	0
TCONS_00005111	XLOC_003282	XLOC_003282	Novel_lncRNA	102170014	TNFRSF17	1	0
TCONS_00005111	XLOC_003282	XLOC_003282	Novel_lncRNA	102179936	LOC102179936	1	0
TCONS_00005111	XLOC_003282	XLOC_003282	Novel_lncRNA	102188254	LOC102188254	1	0
TCONS_00005111	XLOC_003282	XLOC_003282	Novel_lncRNA	102186095	LMNTD2	1	0
TCONS_00005111	XLOC_003282	XLOC_003282	Novel_lncRNA	102176804	ANKRD60	1	0
TCONS_00005111	XLOC_003282	XLOC_003282	Novel_lncRNA	108633288	LOC108633288	1	0
TCONS_00005111	XLOC_003282	XLOC_003282	Novel_lncRNA	102169312	OC90	1	0
TCONS_00005111	XLOC_003282	XLOC_003282	Novel_lncRNA	108637736	OPN3	1	0
TCONS_00005111	XLOC_003282	XLOC_003282	Novel_lncRNA	106503958	LOC106503958	1	0
TCONS_00005111	XLOC_003282	XLOC_003282	Novel_lncRNA	102175925	LOC102175925	1	0
TCONS_00005111	XLOC_003282	XLOC_003282	Novel_lncRNA	108638237	LOC108638237	1	0
TCONS_00005111	XLOC_003282	XLOC_003282	Novel_lncRNA	102178541	SLCO6A1	1	0
TCONS_00005111	XLOC_003282	XLOC_003282	Novel_lncRNA	108638408	IRX4	1	0
TCONS_00005111	XLOC_003282	XLOC_003282	Novel_lncRNA	102186556	LRGUK	1	0
TCONS_00005111	XLOC_003282	XLOC_003282	Novel_lncRNA	102183203	LOC102183203	1	0
TCONS_00005111	XLOC_003282	XLOC_003282	Novel_lncRNA	102172975	PIK3C2G	1	0
TCONS_00005111	XLOC_003282	XLOC_003282	Novel_lncRNA	102174637	F9	1	0
TCONS_00005111	XLOC_003282	XLOC_003282	Novel_lncRNA	108634850	LOC108634850	1	0
TCONS_00005111	XLOC_003282	XLOC_003282	Novel_lncRNA	102183996	AGRP	1	0
TCONS_00005111	XLOC_003282	XLOC_003282	Novel_lncRNA	102171720	GJB2	1	0
TCONS_00005111	XLOC_003282	XLOC_003282	Novel_lncRNA	102170234	LOC102170234	1	0
TCONS_00005111	XLOC_003282	XLOC_003282	Novel_lncRNA	102183581	LOC102183581	1	0
TCONS_00005111	XLOC_003282	XLOC_003282	Novel_lncRNA	102175286	LOC102175286	1	0
TCONS_00005111	XLOC_003282	XLOC_003282	Novel_lncRNA	102174635	SLC22A18	1	0
TCONS_00005111	XLOC_003282	XLOC_003282	Novel_lncRNA	102177037	TEX33	1	0
TCONS_00005111	XLOC_003282	XLOC_003282	Novel_lncRNA	106502327	LOC106502327	1	0
TCONS_00005111	XLOC_003282	XLOC_003282	Novel_lncRNA	108634074	LOC108634074	1	0
TCONS_00005111	XLOC_003282	XLOC_003282	Novel_lncRNA	102179133	PPY	1	0
TCONS_00005111	XLOC_003282	XLOC_003282	Novel_lncRNA	102180541	GRK7	1	0
TCONS_00005111	XLOC_003282	XLOC_003282	Novel_lncRNA	102190774	LOC102190774	1	0
TCONS_00005111	XLOC_003282	XLOC_003282	Novel_lncRNA	102171118	LOC102171118	1	0
TCONS_00005111	XLOC_003282	XLOC_003282	Novel_lncRNA	102170557	DNMT3L	1	0
TCONS_00005111	XLOC_003282	XLOC_003282	Novel_lncRNA	108638212	LOC108638212	1	0
TCONS_00005111	XLOC_003282	XLOC_003282	Novel_lncRNA	102186860	TEX43	1	0
TCONS_00005111	XLOC_003282	XLOC_003282	Novel_lncRNA	102175661	AWAT1	1	0
TCONS_00005111	XLOC_003282	XLOC_003282	Novel_lncRNA	102175987	LOC102175987	1	0
TCONS_00005111	XLOC_003282	XLOC_003282	Novel_lncRNA	108634508	LOC108634508	1	0
TCONS_00005111	XLOC_003282	XLOC_003282	Novel_lncRNA	102186205	LOC102186205	1	0
TCONS_00005111	XLOC_003282	XLOC_003282	Novel_lncRNA	102185156	LOC102185156	1	0
TCONS_00005111	XLOC_003282	XLOC_003282	Novel_lncRNA	102190989	B4GALNT2	1	0
TCONS_00005111	XLOC_003282	XLOC_003282	Novel_lncRNA	102173727	ZNF845	1	0
TCONS_00005111	XLOC_003282	XLOC_003282	Novel_lncRNA	102171649	RNF222	1	0
TCONS_00005111	XLOC_003282	XLOC_003282	Novel_lncRNA	102179523	PCP4	1	0
TCONS_00005111	XLOC_003282	XLOC_003282	Novel_lncRNA	102177323	MKRN3	1	0
TCONS_00005111	XLOC_003282	XLOC_003282	Novel_lncRNA	102189435	SOX14	1	0
TCONS_00005111	XLOC_003282	XLOC_003282	Novel_lncRNA	102189647	LIPK	1	0
TCONS_00005111	XLOC_003282	XLOC_003282	Novel_lncRNA	102170996	LOC102170996	1	0
TCONS_00005111	XLOC_003282	XLOC_003282	Novel_lncRNA	108636550	LOC108636550	1	0
TCONS_00005111	XLOC_003282	XLOC_003282	Novel_lncRNA	106503767	LOC106503767	1	0
TCONS_00005111	XLOC_003282	XLOC_003282	Novel_lncRNA	102168316	ZG16	1	0
TCONS_00005111	XLOC_003282	XLOC_003282	Novel_lncRNA	102190992	LOC102190992	1	0
TCONS_00005111	XLOC_003282	XLOC_003282	Novel_lncRNA	102180138	TMEM74B	1	0
TCONS_00005111	XLOC_003282	XLOC_003282	Novel_lncRNA	108637775	LOC108637775	1	0
TCONS_00005111	XLOC_003282	XLOC_003282	Novel_lncRNA	102169608	LOC102169608	1	0
TCONS_00005111	XLOC_003282	XLOC_003282	Novel_lncRNA	102172230	LOC102172230	1	0
TCONS_00005111	XLOC_003282	XLOC_003282	Novel_lncRNA	102171837	LOC102171837	1	0
TCONS_00005111	XLOC_003282	XLOC_003282	Novel_lncRNA	102187403	PRSS55	1	0
TCONS_00005111	XLOC_003282	XLOC_003282	Novel_lncRNA	102179983	MROH2B	1	0
TCONS_00005111	XLOC_003282	XLOC_003282	Novel_lncRNA	108637271	POU4F1	1	0
TCONS_00005111	XLOC_003282	XLOC_003282	Novel_lncRNA	102178106	KRT14	1	0
TCONS_00005111	XLOC_003282	XLOC_003282	Novel_lncRNA	102180349	NKX2-5	1	0
TCONS_00005111	XLOC_003282	XLOC_003282	Novel_lncRNA	102175416	NRSN2	1	0
TCONS_00005111	XLOC_003282	XLOC_003282	Novel_lncRNA	102175572	LOC102175572	1	0
TCONS_00005111	XLOC_003282	XLOC_003282	Novel_lncRNA	102184387	CPO	1	0
TCONS_00005111	XLOC_003282	XLOC_003282	Novel_lncRNA	102181974	NPPA	1	0
TCONS_00005111	XLOC_003282	XLOC_003282	Novel_lncRNA	108635390	LOC108635390	1	0
TCONS_00005111	XLOC_003282	XLOC_003282	Novel_lncRNA	102181836	PLEKHS1	1	0
TCONS_00005111	XLOC_003282	XLOC_003282	Novel_lncRNA	108635475	LOC108635475	1	0
TCONS_00005111	XLOC_003282	XLOC_003282	Novel_lncRNA	108638246	LOC108638246	1	0
TCONS_00005111	XLOC_003282	XLOC_003282	Novel_lncRNA	102184828	SLC30A8	1	0
TCONS_00005111	XLOC_003282	XLOC_003282	Novel_lncRNA	100860913	IGFBP1	1	0
TCONS_00005111	XLOC_003282	XLOC_003282	Novel_lncRNA	102180955	CCDC185	1	0
TCONS_00005111	XLOC_003282	XLOC_003282	Novel_lncRNA	108636278	LOC108636278	1	0
TCONS_00005111	XLOC_003282	XLOC_003282	Novel_lncRNA	108638450	LOC108638450	1	0
TCONS_00005111	XLOC_003282	XLOC_003282	Novel_lncRNA	102168282	TTLL10	1	0
TCONS_00005111	XLOC_003282	XLOC_003282	Novel_lncRNA	102186722	ZBBX	1	0
TCONS_00005111	XLOC_003282	XLOC_003282	Novel_lncRNA	102187559	LOC102187559	1	0
TCONS_00005111	XLOC_003282	XLOC_003282	Novel_lncRNA	102180500	CPNE6	1	0
TCONS_00005111	XLOC_003282	XLOC_003282	Novel_lncRNA	102179077	TEX13B	1	0
TCONS_00005111	XLOC_003282	XLOC_003282	Novel_lncRNA	108633268	LOC108633268	1	0
TCONS_00005111	XLOC_003282	XLOC_003282	Novel_lncRNA	102176079	C1H21orf58	1	0
TCONS_00005111	XLOC_003282	XLOC_003282	Novel_lncRNA	102170469	CCDC33	1	0
TCONS_00005111	XLOC_003282	XLOC_003282	Novel_lncRNA	102181476	C29H11orf86	1	0
TCONS_00005111	XLOC_003282	XLOC_003282	Novel_lncRNA	102180110	LOC102180110	1	0
TCONS_00005111	XLOC_003282	XLOC_003282	Novel_lncRNA	102191070	CABP7	1	0
TCONS_00005111	XLOC_003282	XLOC_003282	Novel_lncRNA	108637591	LOC108637591	1	0
TCONS_00005111	XLOC_003282	XLOC_003282	Novel_lncRNA	102191160	LOC102191160	1	0
TCONS_00005111	XLOC_003282	XLOC_003282	Novel_lncRNA	102185710	MYL7	1	0
TCONS_00005111	XLOC_003282	XLOC_003282	Novel_lncRNA	102187721	LYPD6B	1	1.84889e-32
TCONS_00005111	XLOC_003282	XLOC_003282	Novel_lncRNA	108636285	NKX3-2	1	1.84889e-32
TCONS_00005969	XLOC_003916	XLOC_003916	Novel_lncRNA	102173832	RLN3	1	0
TCONS_00005969	XLOC_003916	XLOC_003916	Novel_lncRNA	102186657	LOC102186657	1	0
TCONS_00005969	XLOC_003916	XLOC_003916	Novel_lncRNA	102188467	TRIM67	1	0
TCONS_00005969	XLOC_003916	XLOC_003916	Novel_lncRNA	102181195	DMC1	1	0
TCONS_00005969	XLOC_003916	XLOC_003916	Novel_lncRNA	102168535	LOC102168535	1	0
TCONS_00005969	XLOC_003916	XLOC_003916	Novel_lncRNA	102173783	LOC102173783	1	0
TCONS_00005969	XLOC_003916	XLOC_003916	Novel_lncRNA	102175964	LOC102175964	1	0
TCONS_00005969	XLOC_003916	XLOC_003916	Novel_lncRNA	102179409	KLK11	1	0
TCONS_00005969	XLOC_003916	XLOC_003916	Novel_lncRNA	102183170	NPHS2	1	0
TCONS_00005969	XLOC_003916	XLOC_003916	Novel_lncRNA	102177885	TLE6	1	0
TCONS_00005969	XLOC_003916	XLOC_003916	Novel_lncRNA	102178571	GMNC	1	0
TCONS_00005969	XLOC_003916	XLOC_003916	Novel_lncRNA	102177362	CES3	1	0
TCONS_00005969	XLOC_003916	XLOC_003916	Novel_lncRNA	102170014	TNFRSF17	1	0
TCONS_00005969	XLOC_003916	XLOC_003916	Novel_lncRNA	102188254	LOC102188254	1	0
TCONS_00005969	XLOC_003916	XLOC_003916	Novel_lncRNA	102186095	LMNTD2	1	0
TCONS_00005969	XLOC_003916	XLOC_003916	Novel_lncRNA	102176804	ANKRD60	1	0
TCONS_00005969	XLOC_003916	XLOC_003916	Novel_lncRNA	108633288	LOC108633288	1	0
TCONS_00005969	XLOC_003916	XLOC_003916	Novel_lncRNA	102169312	OC90	1	0
TCONS_00005969	XLOC_003916	XLOC_003916	Novel_lncRNA	108637736	OPN3	1	0
TCONS_00005969	XLOC_003916	XLOC_003916	Novel_lncRNA	106503958	LOC106503958	1	0
TCONS_00005969	XLOC_003916	XLOC_003916	Novel_lncRNA	102175925	LOC102175925	1	0
TCONS_00005969	XLOC_003916	XLOC_003916	Novel_lncRNA	108638237	LOC108638237	1	0
TCONS_00005969	XLOC_003916	XLOC_003916	Novel_lncRNA	108638408	IRX4	1	0
TCONS_00005969	XLOC_003916	XLOC_003916	Novel_lncRNA	102186556	LRGUK	1	0
TCONS_00005969	XLOC_003916	XLOC_003916	Novel_lncRNA	102183203	LOC102183203	1	0
TCONS_00005969	XLOC_003916	XLOC_003916	Novel_lncRNA	102172975	PIK3C2G	1	0
TCONS_00005969	XLOC_003916	XLOC_003916	Novel_lncRNA	102174637	F9	1	0
TCONS_00005969	XLOC_003916	XLOC_003916	Novel_lncRNA	108634850	LOC108634850	1	0
TCONS_00005969	XLOC_003916	XLOC_003916	Novel_lncRNA	102171720	GJB2	1	0
TCONS_00005969	XLOC_003916	XLOC_003916	Novel_lncRNA	102170234	LOC102170234	1	0
TCONS_00005969	XLOC_003916	XLOC_003916	Novel_lncRNA	102183581	LOC102183581	1	0
TCONS_00005969	XLOC_003916	XLOC_003916	Novel_lncRNA	102175286	LOC102175286	1	0
TCONS_00005969	XLOC_003916	XLOC_003916	Novel_lncRNA	102174635	SLC22A18	1	0
TCONS_00005969	XLOC_003916	XLOC_003916	Novel_lncRNA	102177037	TEX33	1	0
TCONS_00005969	XLOC_003916	XLOC_003916	Novel_lncRNA	106502327	LOC106502327	1	0
TCONS_00005969	XLOC_003916	XLOC_003916	Novel_lncRNA	108634074	LOC108634074	1	0
TCONS_00005969	XLOC_003916	XLOC_003916	Novel_lncRNA	102179133	PPY	1	0
TCONS_00005969	XLOC_003916	XLOC_003916	Novel_lncRNA	102190774	LOC102190774	1	0
TCONS_00005969	XLOC_003916	XLOC_003916	Novel_lncRNA	102171118	LOC102171118	1	0
TCONS_00005969	XLOC_003916	XLOC_003916	Novel_lncRNA	102170557	DNMT3L	1	0
TCONS_00005969	XLOC_003916	XLOC_003916	Novel_lncRNA	108638212	LOC108638212	1	0
TCONS_00005969	XLOC_003916	XLOC_003916	Novel_lncRNA	102186860	TEX43	1	0
TCONS_00005969	XLOC_003916	XLOC_003916	Novel_lncRNA	102175661	AWAT1	1	0
TCONS_00005969	XLOC_003916	XLOC_003916	Novel_lncRNA	102175987	LOC102175987	1	0
TCONS_00005969	XLOC_003916	XLOC_003916	Novel_lncRNA	108634508	LOC108634508	1	0
TCONS_00005969	XLOC_003916	XLOC_003916	Novel_lncRNA	102186205	LOC102186205	1	0
TCONS_00005969	XLOC_003916	XLOC_003916	Novel_lncRNA	102185156	LOC102185156	1	0
TCONS_00005969	XLOC_003916	XLOC_003916	Novel_lncRNA	102190989	B4GALNT2	1	0
TCONS_00005969	XLOC_003916	XLOC_003916	Novel_lncRNA	102173727	ZNF845	1	0
TCONS_00005969	XLOC_003916	XLOC_003916	Novel_lncRNA	102171649	RNF222	1	0
TCONS_00005969	XLOC_003916	XLOC_003916	Novel_lncRNA	102179523	PCP4	1	0
TCONS_00005969	XLOC_003916	XLOC_003916	Novel_lncRNA	102177323	MKRN3	1	0
TCONS_00005969	XLOC_003916	XLOC_003916	Novel_lncRNA	102189435	SOX14	1	0
TCONS_00005969	XLOC_003916	XLOC_003916	Novel_lncRNA	102189647	LIPK	1	0
TCONS_00005969	XLOC_003916	XLOC_003916	Novel_lncRNA	102170996	LOC102170996	1	0
TCONS_00005969	XLOC_003916	XLOC_003916	Novel_lncRNA	108636550	LOC108636550	1	0
TCONS_00005969	XLOC_003916	XLOC_003916	Novel_lncRNA	106503767	LOC106503767	1	0
TCONS_00005969	XLOC_003916	XLOC_003916	Novel_lncRNA	102168316	ZG16	1	0
TCONS_00005969	XLOC_003916	XLOC_003916	Novel_lncRNA	102190992	LOC102190992	1	0
TCONS_00005969	XLOC_003916	XLOC_003916	Novel_lncRNA	102180138	TMEM74B	1	0
TCONS_00005969	XLOC_003916	XLOC_003916	Novel_lncRNA	108637775	LOC108637775	1	0
TCONS_00005969	XLOC_003916	XLOC_003916	Novel_lncRNA	102169608	LOC102169608	1	0
TCONS_00005969	XLOC_003916	XLOC_003916	Novel_lncRNA	102172230	LOC102172230	1	0
TCONS_00005969	XLOC_003916	XLOC_003916	Novel_lncRNA	102171837	LOC102171837	1	0
TCONS_00005969	XLOC_003916	XLOC_003916	Novel_lncRNA	102187403	PRSS55	1	0
TCONS_00005969	XLOC_003916	XLOC_003916	Novel_lncRNA	102179983	MROH2B	1	0
TCONS_00005969	XLOC_003916	XLOC_003916	Novel_lncRNA	102178106	KRT14	1	0
TCONS_00005969	XLOC_003916	XLOC_003916	Novel_lncRNA	102175416	NRSN2	1	0
TCONS_00005969	XLOC_003916	XLOC_003916	Novel_lncRNA	102175572	LOC102175572	1	0
TCONS_00005969	XLOC_003916	XLOC_003916	Novel_lncRNA	102184387	CPO	1	0
TCONS_00005969	XLOC_003916	XLOC_003916	Novel_lncRNA	102181974	NPPA	1	0
TCONS_00005969	XLOC_003916	XLOC_003916	Novel_lncRNA	108635390	LOC108635390	1	0
TCONS_00005969	XLOC_003916	XLOC_003916	Novel_lncRNA	102181836	PLEKHS1	1	0
TCONS_00005969	XLOC_003916	XLOC_003916	Novel_lncRNA	108636285	NKX3-2	1	0
TCONS_00005969	XLOC_003916	XLOC_003916	Novel_lncRNA	108638246	LOC108638246	1	0
TCONS_00005969	XLOC_003916	XLOC_003916	Novel_lncRNA	102184828	SLC30A8	1	0
TCONS_00005969	XLOC_003916	XLOC_003916	Novel_lncRNA	100860913	IGFBP1	1	0
TCONS_00005969	XLOC_003916	XLOC_003916	Novel_lncRNA	102180955	CCDC185	1	0
TCONS_00005969	XLOC_003916	XLOC_003916	Novel_lncRNA	108636278	LOC108636278	1	0
TCONS_00005969	XLOC_003916	XLOC_003916	Novel_lncRNA	102186722	ZBBX	1	0
TCONS_00005969	XLOC_003916	XLOC_003916	Novel_lncRNA	102187559	LOC102187559	1	0
TCONS_00005969	XLOC_003916	XLOC_003916	Novel_lncRNA	102180500	CPNE6	1	0
TCONS_00005969	XLOC_003916	XLOC_003916	Novel_lncRNA	102179077	TEX13B	1	0
TCONS_00005969	XLOC_003916	XLOC_003916	Novel_lncRNA	108633268	LOC108633268	1	0
TCONS_00005969	XLOC_003916	XLOC_003916	Novel_lncRNA	102176079	C1H21orf58	1	0
TCONS_00005969	XLOC_003916	XLOC_003916	Novel_lncRNA	102170469	CCDC33	1	0
TCONS_00005969	XLOC_003916	XLOC_003916	Novel_lncRNA	102181476	C29H11orf86	1	0
TCONS_00005969	XLOC_003916	XLOC_003916	Novel_lncRNA	102180110	LOC102180110	1	0
TCONS_00005969	XLOC_003916	XLOC_003916	Novel_lncRNA	102191070	CABP7	1	0
TCONS_00005969	XLOC_003916	XLOC_003916	Novel_lncRNA	108637591	LOC108637591	1	0
TCONS_00005969	XLOC_003916	XLOC_003916	Novel_lncRNA	102191160	LOC102191160	1	0
TCONS_00005969	XLOC_003916	XLOC_003916	Novel_lncRNA	102185710	MYL7	1	0
TCONS_00005969	XLOC_003916	XLOC_003916	Novel_lncRNA	102187721	LYPD6B	1	1.84889e-32
TCONS_00005969	XLOC_003916	XLOC_003916	Novel_lncRNA	108637271	POU4F1	1	1.84889e-32
TCONS_00005969	XLOC_003916	XLOC_003916	Novel_lncRNA	102180349	NKX2-5	1	1.84889e-32
TCONS_00005969	XLOC_003916	XLOC_003916	Novel_lncRNA	108635475	LOC108635475	1	1.84889e-32
TCONS_00005969	XLOC_003916	XLOC_003916	Novel_lncRNA	102168282	TTLL10	1	1.84889e-32
TCONS_00005969	XLOC_003916	XLOC_003916	Novel_lncRNA	102179936	LOC102179936	1	7.39557e-32
TCONS_00005969	XLOC_003916	XLOC_003916	Novel_lncRNA	102178541	SLCO6A1	1	7.39557e-32
TCONS_00005969	XLOC_003916	XLOC_003916	Novel_lncRNA	102183996	AGRP	1	7.39557e-32
TCONS_00005969	XLOC_003916	XLOC_003916	Novel_lncRNA	102180541	GRK7	1	7.39557e-32
TCONS_00005969	XLOC_003916	XLOC_003916	Novel_lncRNA	108638450	LOC108638450	1	7.39557e-32
TCONS_00026307	XLOC_016605	XLOC_016605	Novel_lncRNA	102173832	RLN3	1	0
TCONS_00026307	XLOC_016605	XLOC_016605	Novel_lncRNA	102186657	LOC102186657	1	0
TCONS_00026307	XLOC_016605	XLOC_016605	Novel_lncRNA	102188467	TRIM67	1	0
TCONS_00026307	XLOC_016605	XLOC_016605	Novel_lncRNA	102181195	DMC1	1	0
TCONS_00026307	XLOC_016605	XLOC_016605	Novel_lncRNA	102168535	LOC102168535	1	0
TCONS_00026307	XLOC_016605	XLOC_016605	Novel_lncRNA	102173783	LOC102173783	1	0
TCONS_00026307	XLOC_016605	XLOC_016605	Novel_lncRNA	102175964	LOC102175964	1	0
TCONS_00026307	XLOC_016605	XLOC_016605	Novel_lncRNA	102179409	KLK11	1	0
TCONS_00026307	XLOC_016605	XLOC_016605	Novel_lncRNA	102183170	NPHS2	1	0
TCONS_00026307	XLOC_016605	XLOC_016605	Novel_lncRNA	102177885	TLE6	1	0
TCONS_00026307	XLOC_016605	XLOC_016605	Novel_lncRNA	102178571	GMNC	1	0
TCONS_00026307	XLOC_016605	XLOC_016605	Novel_lncRNA	102177362	CES3	1	0
TCONS_00026307	XLOC_016605	XLOC_016605	Novel_lncRNA	102170014	TNFRSF17	1	0
TCONS_00026307	XLOC_016605	XLOC_016605	Novel_lncRNA	102179936	LOC102179936	1	0
TCONS_00026307	XLOC_016605	XLOC_016605	Novel_lncRNA	102188254	LOC102188254	1	0
TCONS_00026307	XLOC_016605	XLOC_016605	Novel_lncRNA	102186095	LMNTD2	1	0
TCONS_00026307	XLOC_016605	XLOC_016605	Novel_lncRNA	102176804	ANKRD60	1	0
TCONS_00026307	XLOC_016605	XLOC_016605	Novel_lncRNA	108633288	LOC108633288	1	0
TCONS_00026307	XLOC_016605	XLOC_016605	Novel_lncRNA	102169312	OC90	1	0
TCONS_00026307	XLOC_016605	XLOC_016605	Novel_lncRNA	108637736	OPN3	1	0
TCONS_00026307	XLOC_016605	XLOC_016605	Novel_lncRNA	106503958	LOC106503958	1	0
TCONS_00026307	XLOC_016605	XLOC_016605	Novel_lncRNA	102175925	LOC102175925	1	0
TCONS_00026307	XLOC_016605	XLOC_016605	Novel_lncRNA	108638237	LOC108638237	1	0
TCONS_00026307	XLOC_016605	XLOC_016605	Novel_lncRNA	102178541	SLCO6A1	1	0
TCONS_00026307	XLOC_016605	XLOC_016605	Novel_lncRNA	108638408	IRX4	1	0
TCONS_00026307	XLOC_016605	XLOC_016605	Novel_lncRNA	102186556	LRGUK	1	0
TCONS_00026307	XLOC_016605	XLOC_016605	Novel_lncRNA	102183203	LOC102183203	1	0
TCONS_00026307	XLOC_016605	XLOC_016605	Novel_lncRNA	102172975	PIK3C2G	1	0
TCONS_00026307	XLOC_016605	XLOC_016605	Novel_lncRNA	102174637	F9	1	0
TCONS_00026307	XLOC_016605	XLOC_016605	Novel_lncRNA	108634850	LOC108634850	1	0
TCONS_00026307	XLOC_016605	XLOC_016605	Novel_lncRNA	102183996	AGRP	1	0
TCONS_00026307	XLOC_016605	XLOC_016605	Novel_lncRNA	102171720	GJB2	1	0
TCONS_00026307	XLOC_016605	XLOC_016605	Novel_lncRNA	102170234	LOC102170234	1	0
TCONS_00026307	XLOC_016605	XLOC_016605	Novel_lncRNA	102183581	LOC102183581	1	0
TCONS_00026307	XLOC_016605	XLOC_016605	Novel_lncRNA	102175286	LOC102175286	1	0
TCONS_00026307	XLOC_016605	XLOC_016605	Novel_lncRNA	102174635	SLC22A18	1	0
TCONS_00026307	XLOC_016605	XLOC_016605	Novel_lncRNA	102177037	TEX33	1	0
TCONS_00026307	XLOC_016605	XLOC_016605	Novel_lncRNA	106502327	LOC106502327	1	0
TCONS_00026307	XLOC_016605	XLOC_016605	Novel_lncRNA	108634074	LOC108634074	1	0
TCONS_00026307	XLOC_016605	XLOC_016605	Novel_lncRNA	102179133	PPY	1	0
TCONS_00026307	XLOC_016605	XLOC_016605	Novel_lncRNA	102180541	GRK7	1	0
TCONS_00026307	XLOC_016605	XLOC_016605	Novel_lncRNA	102190774	LOC102190774	1	0
TCONS_00026307	XLOC_016605	XLOC_016605	Novel_lncRNA	102171118	LOC102171118	1	0
TCONS_00026307	XLOC_016605	XLOC_016605	Novel_lncRNA	102170557	DNMT3L	1	0
TCONS_00026307	XLOC_016605	XLOC_016605	Novel_lncRNA	108638212	LOC108638212	1	0
TCONS_00026307	XLOC_016605	XLOC_016605	Novel_lncRNA	102186860	TEX43	1	0
TCONS_00026307	XLOC_016605	XLOC_016605	Novel_lncRNA	102175661	AWAT1	1	0
TCONS_00026307	XLOC_016605	XLOC_016605	Novel_lncRNA	102175987	LOC102175987	1	0
TCONS_00026307	XLOC_016605	XLOC_016605	Novel_lncRNA	108634508	LOC108634508	1	0
TCONS_00026307	XLOC_016605	XLOC_016605	Novel_lncRNA	102186205	LOC102186205	1	0
TCONS_00026307	XLOC_016605	XLOC_016605	Novel_lncRNA	102185156	LOC102185156	1	0
TCONS_00026307	XLOC_016605	XLOC_016605	Novel_lncRNA	102190989	B4GALNT2	1	0
TCONS_00026307	XLOC_016605	XLOC_016605	Novel_lncRNA	102173727	ZNF845	1	0
TCONS_00026307	XLOC_016605	XLOC_016605	Novel_lncRNA	102171649	RNF222	1	0
TCONS_00026307	XLOC_016605	XLOC_016605	Novel_lncRNA	102179523	PCP4	1	0
TCONS_00026307	XLOC_016605	XLOC_016605	Novel_lncRNA	102177323	MKRN3	1	0
TCONS_00026307	XLOC_016605	XLOC_016605	Novel_lncRNA	102189435	SOX14	1	0
TCONS_00026307	XLOC_016605	XLOC_016605	Novel_lncRNA	102189647	LIPK	1	0
TCONS_00026307	XLOC_016605	XLOC_016605	Novel_lncRNA	102170996	LOC102170996	1	0
TCONS_00026307	XLOC_016605	XLOC_016605	Novel_lncRNA	108636550	LOC108636550	1	0
TCONS_00026307	XLOC_016605	XLOC_016605	Novel_lncRNA	106503767	LOC106503767	1	0
TCONS_00026307	XLOC_016605	XLOC_016605	Novel_lncRNA	102168316	ZG16	1	0
TCONS_00026307	XLOC_016605	XLOC_016605	Novel_lncRNA	102190992	LOC102190992	1	0
TCONS_00026307	XLOC_016605	XLOC_016605	Novel_lncRNA	102180138	TMEM74B	1	0
TCONS_00026307	XLOC_016605	XLOC_016605	Novel_lncRNA	108637775	LOC108637775	1	0
TCONS_00026307	XLOC_016605	XLOC_016605	Novel_lncRNA	102169608	LOC102169608	1	0
TCONS_00026307	XLOC_016605	XLOC_016605	Novel_lncRNA	102172230	LOC102172230	1	0
TCONS_00026307	XLOC_016605	XLOC_016605	Novel_lncRNA	102171837	LOC102171837	1	0
TCONS_00026307	XLOC_016605	XLOC_016605	Novel_lncRNA	102187403	PRSS55	1	0
TCONS_00026307	XLOC_016605	XLOC_016605	Novel_lncRNA	102179983	MROH2B	1	0
TCONS_00026307	XLOC_016605	XLOC_016605	Novel_lncRNA	108637271	POU4F1	1	0
TCONS_00026307	XLOC_016605	XLOC_016605	Novel_lncRNA	102178106	KRT14	1	0
TCONS_00026307	XLOC_016605	XLOC_016605	Novel_lncRNA	102180349	NKX2-5	1	0
TCONS_00026307	XLOC_016605	XLOC_016605	Novel_lncRNA	102175416	NRSN2	1	0
TCONS_00026307	XLOC_016605	XLOC_016605	Novel_lncRNA	102175572	LOC102175572	1	0
TCONS_00026307	XLOC_016605	XLOC_016605	Novel_lncRNA	102184387	CPO	1	0
TCONS_00026307	XLOC_016605	XLOC_016605	Novel_lncRNA	102181974	NPPA	1	0
TCONS_00026307	XLOC_016605	XLOC_016605	Novel_lncRNA	108635390	LOC108635390	1	0
TCONS_00026307	XLOC_016605	XLOC_016605	Novel_lncRNA	102181836	PLEKHS1	1	0
TCONS_00026307	XLOC_016605	XLOC_016605	Novel_lncRNA	108635475	LOC108635475	1	0
TCONS_00026307	XLOC_016605	XLOC_016605	Novel_lncRNA	108638246	LOC108638246	1	0
TCONS_00026307	XLOC_016605	XLOC_016605	Novel_lncRNA	102184828	SLC30A8	1	0
TCONS_00026307	XLOC_016605	XLOC_016605	Novel_lncRNA	100860913	IGFBP1	1	0
TCONS_00026307	XLOC_016605	XLOC_016605	Novel_lncRNA	102180955	CCDC185	1	0
TCONS_00026307	XLOC_016605	XLOC_016605	Novel_lncRNA	108636278	LOC108636278	1	0
TCONS_00026307	XLOC_016605	XLOC_016605	Novel_lncRNA	108638450	LOC108638450	1	0
TCONS_00026307	XLOC_016605	XLOC_016605	Novel_lncRNA	102168282	TTLL10	1	0
TCONS_00026307	XLOC_016605	XLOC_016605	Novel_lncRNA	102186722	ZBBX	1	0
TCONS_00026307	XLOC_016605	XLOC_016605	Novel_lncRNA	102187559	LOC102187559	1	0
TCONS_00026307	XLOC_016605	XLOC_016605	Novel_lncRNA	102180500	CPNE6	1	0
TCONS_00026307	XLOC_016605	XLOC_016605	Novel_lncRNA	102179077	TEX13B	1	0
TCONS_00026307	XLOC_016605	XLOC_016605	Novel_lncRNA	108633268	LOC108633268	1	0
TCONS_00026307	XLOC_016605	XLOC_016605	Novel_lncRNA	102176079	C1H21orf58	1	0
TCONS_00026307	XLOC_016605	XLOC_016605	Novel_lncRNA	102170469	CCDC33	1	0
TCONS_00026307	XLOC_016605	XLOC_016605	Novel_lncRNA	102181476	C29H11orf86	1	0
TCONS_00026307	XLOC_016605	XLOC_016605	Novel_lncRNA	102180110	LOC102180110	1	0
TCONS_00026307	XLOC_016605	XLOC_016605	Novel_lncRNA	102191070	CABP7	1	0
TCONS_00026307	XLOC_016605	XLOC_016605	Novel_lncRNA	108637591	LOC108637591	1	0
TCONS_00026307	XLOC_016605	XLOC_016605	Novel_lncRNA	102191160	LOC102191160	1	0
TCONS_00026307	XLOC_016605	XLOC_016605	Novel_lncRNA	102185710	MYL7	1	0
TCONS_00026307	XLOC_016605	XLOC_016605	Novel_lncRNA	102187721	LYPD6B	1	1.84889e-32
TCONS_00026307	XLOC_016605	XLOC_016605	Novel_lncRNA	108636285	NKX3-2	1	1.84889e-32
TCONS_00075496	XLOC_048169	XLOC_048169	Novel_lncRNA	102186657	LOC102186657	1	0
TCONS_00075496	XLOC_048169	XLOC_048169	Novel_lncRNA	102188467	TRIM67	1	0
TCONS_00075496	XLOC_048169	XLOC_048169	Novel_lncRNA	102181195	DMC1	1	0
TCONS_00075496	XLOC_048169	XLOC_048169	Novel_lncRNA	102168535	LOC102168535	1	0
TCONS_00075496	XLOC_048169	XLOC_048169	Novel_lncRNA	102173783	LOC102173783	1	0
TCONS_00075496	XLOC_048169	XLOC_048169	Novel_lncRNA	102175964	LOC102175964	1	0
TCONS_00075496	XLOC_048169	XLOC_048169	Novel_lncRNA	102179409	KLK11	1	0
TCONS_00075496	XLOC_048169	XLOC_048169	Novel_lncRNA	102183170	NPHS2	1	0
TCONS_00075496	XLOC_048169	XLOC_048169	Novel_lncRNA	102177885	TLE6	1	0
TCONS_00075496	XLOC_048169	XLOC_048169	Novel_lncRNA	102178571	GMNC	1	0
TCONS_00075496	XLOC_048169	XLOC_048169	Novel_lncRNA	102177362	CES3	1	0
TCONS_00075496	XLOC_048169	XLOC_048169	Novel_lncRNA	102170014	TNFRSF17	1	0
TCONS_00075496	XLOC_048169	XLOC_048169	Novel_lncRNA	102187721	LYPD6B	1	0
TCONS_00075496	XLOC_048169	XLOC_048169	Novel_lncRNA	102179936	LOC102179936	1	0
TCONS_00075496	XLOC_048169	XLOC_048169	Novel_lncRNA	102188254	LOC102188254	1	0
TCONS_00075496	XLOC_048169	XLOC_048169	Novel_lncRNA	102186095	LMNTD2	1	0
TCONS_00075496	XLOC_048169	XLOC_048169	Novel_lncRNA	102176804	ANKRD60	1	0
TCONS_00075496	XLOC_048169	XLOC_048169	Novel_lncRNA	102169312	OC90	1	0
TCONS_00075496	XLOC_048169	XLOC_048169	Novel_lncRNA	108637736	OPN3	1	0
TCONS_00075496	XLOC_048169	XLOC_048169	Novel_lncRNA	102175925	LOC102175925	1	0
TCONS_00075496	XLOC_048169	XLOC_048169	Novel_lncRNA	108638408	IRX4	1	0
TCONS_00075496	XLOC_048169	XLOC_048169	Novel_lncRNA	102186556	LRGUK	1	0
TCONS_00075496	XLOC_048169	XLOC_048169	Novel_lncRNA	102183203	LOC102183203	1	0
TCONS_00075496	XLOC_048169	XLOC_048169	Novel_lncRNA	102172975	PIK3C2G	1	0
TCONS_00075496	XLOC_048169	XLOC_048169	Novel_lncRNA	102174637	F9	1	0
TCONS_00075496	XLOC_048169	XLOC_048169	Novel_lncRNA	108634850	LOC108634850	1	0
TCONS_00075496	XLOC_048169	XLOC_048169	Novel_lncRNA	102183996	AGRP	1	0
TCONS_00075496	XLOC_048169	XLOC_048169	Novel_lncRNA	102171720	GJB2	1	0
TCONS_00075496	XLOC_048169	XLOC_048169	Novel_lncRNA	102170234	LOC102170234	1	0
TCONS_00075496	XLOC_048169	XLOC_048169	Novel_lncRNA	102183581	LOC102183581	1	0
TCONS_00075496	XLOC_048169	XLOC_048169	Novel_lncRNA	102175286	LOC102175286	1	0
TCONS_00075496	XLOC_048169	XLOC_048169	Novel_lncRNA	102174635	SLC22A18	1	0
TCONS_00075496	XLOC_048169	XLOC_048169	Novel_lncRNA	102177037	TEX33	1	0
TCONS_00075496	XLOC_048169	XLOC_048169	Novel_lncRNA	106502327	LOC106502327	1	0
TCONS_00075496	XLOC_048169	XLOC_048169	Novel_lncRNA	108634074	LOC108634074	1	0
TCONS_00075496	XLOC_048169	XLOC_048169	Novel_lncRNA	102179133	PPY	1	0
TCONS_00075496	XLOC_048169	XLOC_048169	Novel_lncRNA	102180541	GRK7	1	0
TCONS_00075496	XLOC_048169	XLOC_048169	Novel_lncRNA	102190774	LOC102190774	1	0
TCONS_00075496	XLOC_048169	XLOC_048169	Novel_lncRNA	102171118	LOC102171118	1	0
TCONS_00075496	XLOC_048169	XLOC_048169	Novel_lncRNA	102170557	DNMT3L	1	0
TCONS_00075496	XLOC_048169	XLOC_048169	Novel_lncRNA	108638212	LOC108638212	1	0
TCONS_00075496	XLOC_048169	XLOC_048169	Novel_lncRNA	102186860	TEX43	1	0
TCONS_00075496	XLOC_048169	XLOC_048169	Novel_lncRNA	102175987	LOC102175987	1	0
TCONS_00075496	XLOC_048169	XLOC_048169	Novel_lncRNA	108634508	LOC108634508	1	0
TCONS_00075496	XLOC_048169	XLOC_048169	Novel_lncRNA	102186205	LOC102186205	1	0
TCONS_00075496	XLOC_048169	XLOC_048169	Novel_lncRNA	102185156	LOC102185156	1	0
TCONS_00075496	XLOC_048169	XLOC_048169	Novel_lncRNA	102190989	B4GALNT2	1	0
TCONS_00075496	XLOC_048169	XLOC_048169	Novel_lncRNA	102173727	ZNF845	1	0
TCONS_00075496	XLOC_048169	XLOC_048169	Novel_lncRNA	102171649	RNF222	1	0
TCONS_00075496	XLOC_048169	XLOC_048169	Novel_lncRNA	102179523	PCP4	1	0
TCONS_00075496	XLOC_048169	XLOC_048169	Novel_lncRNA	102177323	MKRN3	1	0
TCONS_00075496	XLOC_048169	XLOC_048169	Novel_lncRNA	102189435	SOX14	1	0
TCONS_00075496	XLOC_048169	XLOC_048169	Novel_lncRNA	102189647	LIPK	1	0
TCONS_00075496	XLOC_048169	XLOC_048169	Novel_lncRNA	102170996	LOC102170996	1	0
TCONS_00075496	XLOC_048169	XLOC_048169	Novel_lncRNA	108636550	LOC108636550	1	0
TCONS_00075496	XLOC_048169	XLOC_048169	Novel_lncRNA	106503767	LOC106503767	1	0
TCONS_00075496	XLOC_048169	XLOC_048169	Novel_lncRNA	102168316	ZG16	1	0
TCONS_00075496	XLOC_048169	XLOC_048169	Novel_lncRNA	102190992	LOC102190992	1	0
TCONS_00075496	XLOC_048169	XLOC_048169	Novel_lncRNA	102180138	TMEM74B	1	0
TCONS_00075496	XLOC_048169	XLOC_048169	Novel_lncRNA	108637775	LOC108637775	1	0
TCONS_00075496	XLOC_048169	XLOC_048169	Novel_lncRNA	102169608	LOC102169608	1	0
TCONS_00075496	XLOC_048169	XLOC_048169	Novel_lncRNA	102172230	LOC102172230	1	0
TCONS_00075496	XLOC_048169	XLOC_048169	Novel_lncRNA	102171837	LOC102171837	1	0
TCONS_00075496	XLOC_048169	XLOC_048169	Novel_lncRNA	102187403	PRSS55	1	0
TCONS_00075496	XLOC_048169	XLOC_048169	Novel_lncRNA	102179983	MROH2B	1	0
TCONS_00075496	XLOC_048169	XLOC_048169	Novel_lncRNA	108637271	POU4F1	1	0
TCONS_00075496	XLOC_048169	XLOC_048169	Novel_lncRNA	102178106	KRT14	1	0
TCONS_00075496	XLOC_048169	XLOC_048169	Novel_lncRNA	102180349	NKX2-5	1	0
TCONS_00075496	XLOC_048169	XLOC_048169	Novel_lncRNA	102175416	NRSN2	1	0
TCONS_00075496	XLOC_048169	XLOC_048169	Novel_lncRNA	102175572	LOC102175572	1	0
TCONS_00075496	XLOC_048169	XLOC_048169	Novel_lncRNA	102184387	CPO	1	0
TCONS_00075496	XLOC_048169	XLOC_048169	Novel_lncRNA	102181974	NPPA	1	0
TCONS_00075496	XLOC_048169	XLOC_048169	Novel_lncRNA	108635390	LOC108635390	1	0
TCONS_00075496	XLOC_048169	XLOC_048169	Novel_lncRNA	102181836	PLEKHS1	1	0
TCONS_00075496	XLOC_048169	XLOC_048169	Novel_lncRNA	108635475	LOC108635475	1	0
TCONS_00075496	XLOC_048169	XLOC_048169	Novel_lncRNA	108638246	LOC108638246	1	0
TCONS_00075496	XLOC_048169	XLOC_048169	Novel_lncRNA	102184828	SLC30A8	1	0
TCONS_00075496	XLOC_048169	XLOC_048169	Novel_lncRNA	100860913	IGFBP1	1	0
TCONS_00075496	XLOC_048169	XLOC_048169	Novel_lncRNA	102180955	CCDC185	1	0
TCONS_00075496	XLOC_048169	XLOC_048169	Novel_lncRNA	108636278	LOC108636278	1	0
TCONS_00075496	XLOC_048169	XLOC_048169	Novel_lncRNA	108638450	LOC108638450	1	0
TCONS_00075496	XLOC_048169	XLOC_048169	Novel_lncRNA	102168282	TTLL10	1	0
TCONS_00075496	XLOC_048169	XLOC_048169	Novel_lncRNA	102186722	ZBBX	1	0
TCONS_00075496	XLOC_048169	XLOC_048169	Novel_lncRNA	102187559	LOC102187559	1	0
TCONS_00075496	XLOC_048169	XLOC_048169	Novel_lncRNA	102179077	TEX13B	1	0
TCONS_00075496	XLOC_048169	XLOC_048169	Novel_lncRNA	108633268	LOC108633268	1	0
TCONS_00075496	XLOC_048169	XLOC_048169	Novel_lncRNA	102176079	C1H21orf58	1	0
TCONS_00075496	XLOC_048169	XLOC_048169	Novel_lncRNA	102170469	CCDC33	1	0
TCONS_00075496	XLOC_048169	XLOC_048169	Novel_lncRNA	102181476	C29H11orf86	1	0
TCONS_00075496	XLOC_048169	XLOC_048169	Novel_lncRNA	102180110	LOC102180110	1	0
TCONS_00075496	XLOC_048169	XLOC_048169	Novel_lncRNA	102191070	CABP7	1	0
TCONS_00075496	XLOC_048169	XLOC_048169	Novel_lncRNA	108637591	LOC108637591	1	0
TCONS_00075496	XLOC_048169	XLOC_048169	Novel_lncRNA	102191160	LOC102191160	1	0
TCONS_00075496	XLOC_048169	XLOC_048169	Novel_lncRNA	102185710	MYL7	1	0
TCONS_00075496	XLOC_048169	XLOC_048169	Novel_lncRNA	102173832	RLN3	1	1.84889e-32
TCONS_00075496	XLOC_048169	XLOC_048169	Novel_lncRNA	108633288	LOC108633288	1	1.84889e-32
TCONS_00075496	XLOC_048169	XLOC_048169	Novel_lncRNA	106503958	LOC106503958	1	1.84889e-32
TCONS_00075496	XLOC_048169	XLOC_048169	Novel_lncRNA	108638237	LOC108638237	1	1.84889e-32
TCONS_00075496	XLOC_048169	XLOC_048169	Novel_lncRNA	102178541	SLCO6A1	1	1.84889e-32
TCONS_00075496	XLOC_048169	XLOC_048169	Novel_lncRNA	102175661	AWAT1	1	7.39557e-32
TCONS_00075496	XLOC_048169	XLOC_048169	Novel_lncRNA	108636285	NKX3-2	1	7.39557e-32
TCONS_00075496	XLOC_048169	XLOC_048169	Novel_lncRNA	102180500	CPNE6	1	7.39557e-32
TCONS_00099045	XLOC_063218	XLOC_063218	Novel_lncRNA	102173832	RLN3	1	0
TCONS_00099045	XLOC_063218	XLOC_063218	Novel_lncRNA	102186657	LOC102186657	1	0
TCONS_00099045	XLOC_063218	XLOC_063218	Novel_lncRNA	102188467	TRIM67	1	0
TCONS_00099045	XLOC_063218	XLOC_063218	Novel_lncRNA	102181195	DMC1	1	0
TCONS_00099045	XLOC_063218	XLOC_063218	Novel_lncRNA	102173783	LOC102173783	1	0
TCONS_00099045	XLOC_063218	XLOC_063218	Novel_lncRNA	102175964	LOC102175964	1	0
TCONS_00099045	XLOC_063218	XLOC_063218	Novel_lncRNA	102179409	KLK11	1	0
TCONS_00099045	XLOC_063218	XLOC_063218	Novel_lncRNA	102183170	NPHS2	1	0
TCONS_00099045	XLOC_063218	XLOC_063218	Novel_lncRNA	102177885	TLE6	1	0
TCONS_00099045	XLOC_063218	XLOC_063218	Novel_lncRNA	102178571	GMNC	1	0
TCONS_00099045	XLOC_063218	XLOC_063218	Novel_lncRNA	102177362	CES3	1	0
TCONS_00099045	XLOC_063218	XLOC_063218	Novel_lncRNA	102170014	TNFRSF17	1	0
TCONS_00099045	XLOC_063218	XLOC_063218	Novel_lncRNA	102188254	LOC102188254	1	0
TCONS_00099045	XLOC_063218	XLOC_063218	Novel_lncRNA	102186095	LMNTD2	1	0
TCONS_00099045	XLOC_063218	XLOC_063218	Novel_lncRNA	102176804	ANKRD60	1	0
TCONS_00099045	XLOC_063218	XLOC_063218	Novel_lncRNA	108633288	LOC108633288	1	0
TCONS_00099045	XLOC_063218	XLOC_063218	Novel_lncRNA	102169312	OC90	1	0
TCONS_00099045	XLOC_063218	XLOC_063218	Novel_lncRNA	108637736	OPN3	1	0
TCONS_00099045	XLOC_063218	XLOC_063218	Novel_lncRNA	102175925	LOC102175925	1	0
TCONS_00099045	XLOC_063218	XLOC_063218	Novel_lncRNA	102178541	SLCO6A1	1	0
TCONS_00099045	XLOC_063218	XLOC_063218	Novel_lncRNA	108638408	IRX4	1	0
TCONS_00099045	XLOC_063218	XLOC_063218	Novel_lncRNA	102186556	LRGUK	1	0
TCONS_00099045	XLOC_063218	XLOC_063218	Novel_lncRNA	102183203	LOC102183203	1	0
TCONS_00099045	XLOC_063218	XLOC_063218	Novel_lncRNA	102172975	PIK3C2G	1	0
TCONS_00099045	XLOC_063218	XLOC_063218	Novel_lncRNA	102174637	F9	1	0
TCONS_00099045	XLOC_063218	XLOC_063218	Novel_lncRNA	108634850	LOC108634850	1	0
TCONS_00099045	XLOC_063218	XLOC_063218	Novel_lncRNA	102171720	GJB2	1	0
TCONS_00099045	XLOC_063218	XLOC_063218	Novel_lncRNA	102170234	LOC102170234	1	0
TCONS_00099045	XLOC_063218	XLOC_063218	Novel_lncRNA	102183581	LOC102183581	1	0
TCONS_00099045	XLOC_063218	XLOC_063218	Novel_lncRNA	102175286	LOC102175286	1	0
TCONS_00099045	XLOC_063218	XLOC_063218	Novel_lncRNA	102174635	SLC22A18	1	0
TCONS_00099045	XLOC_063218	XLOC_063218	Novel_lncRNA	102177037	TEX33	1	0
TCONS_00099045	XLOC_063218	XLOC_063218	Novel_lncRNA	106502327	LOC106502327	1	0
TCONS_00099045	XLOC_063218	XLOC_063218	Novel_lncRNA	108634074	LOC108634074	1	0
TCONS_00099045	XLOC_063218	XLOC_063218	Novel_lncRNA	102179133	PPY	1	0
TCONS_00099045	XLOC_063218	XLOC_063218	Novel_lncRNA	102190774	LOC102190774	1	0
TCONS_00099045	XLOC_063218	XLOC_063218	Novel_lncRNA	102171118	LOC102171118	1	0
TCONS_00099045	XLOC_063218	XLOC_063218	Novel_lncRNA	102170557	DNMT3L	1	0
TCONS_00099045	XLOC_063218	XLOC_063218	Novel_lncRNA	108638212	LOC108638212	1	0
TCONS_00099045	XLOC_063218	XLOC_063218	Novel_lncRNA	102186860	TEX43	1	0
TCONS_00099045	XLOC_063218	XLOC_063218	Novel_lncRNA	102175661	AWAT1	1	0
TCONS_00099045	XLOC_063218	XLOC_063218	Novel_lncRNA	102175987	LOC102175987	1	0
TCONS_00099045	XLOC_063218	XLOC_063218	Novel_lncRNA	108634508	LOC108634508	1	0
TCONS_00099045	XLOC_063218	XLOC_063218	Novel_lncRNA	102186205	LOC102186205	1	0
TCONS_00099045	XLOC_063218	XLOC_063218	Novel_lncRNA	102190989	B4GALNT2	1	0
TCONS_00099045	XLOC_063218	XLOC_063218	Novel_lncRNA	102173727	ZNF845	1	0
TCONS_00099045	XLOC_063218	XLOC_063218	Novel_lncRNA	102171649	RNF222	1	0
TCONS_00099045	XLOC_063218	XLOC_063218	Novel_lncRNA	102177323	MKRN3	1	0
TCONS_00099045	XLOC_063218	XLOC_063218	Novel_lncRNA	102189435	SOX14	1	0
TCONS_00099045	XLOC_063218	XLOC_063218	Novel_lncRNA	102189647	LIPK	1	0
TCONS_00099045	XLOC_063218	XLOC_063218	Novel_lncRNA	102170996	LOC102170996	1	0
TCONS_00099045	XLOC_063218	XLOC_063218	Novel_lncRNA	108636550	LOC108636550	1	0
TCONS_00099045	XLOC_063218	XLOC_063218	Novel_lncRNA	106503767	LOC106503767	1	0
TCONS_00099045	XLOC_063218	XLOC_063218	Novel_lncRNA	102180138	TMEM74B	1	0
TCONS_00099045	XLOC_063218	XLOC_063218	Novel_lncRNA	108637775	LOC108637775	1	0
TCONS_00099045	XLOC_063218	XLOC_063218	Novel_lncRNA	102172230	LOC102172230	1	0
TCONS_00099045	XLOC_063218	XLOC_063218	Novel_lncRNA	102171837	LOC102171837	1	0
TCONS_00099045	XLOC_063218	XLOC_063218	Novel_lncRNA	102187403	PRSS55	1	0
TCONS_00099045	XLOC_063218	XLOC_063218	Novel_lncRNA	102179983	MROH2B	1	0
TCONS_00099045	XLOC_063218	XLOC_063218	Novel_lncRNA	102178106	KRT14	1	0
TCONS_00099045	XLOC_063218	XLOC_063218	Novel_lncRNA	102180349	NKX2-5	1	0
TCONS_00099045	XLOC_063218	XLOC_063218	Novel_lncRNA	102175416	NRSN2	1	0
TCONS_00099045	XLOC_063218	XLOC_063218	Novel_lncRNA	102175572	LOC102175572	1	0
TCONS_00099045	XLOC_063218	XLOC_063218	Novel_lncRNA	102181974	NPPA	1	0
TCONS_00099045	XLOC_063218	XLOC_063218	Novel_lncRNA	108635390	LOC108635390	1	0
TCONS_00099045	XLOC_063218	XLOC_063218	Novel_lncRNA	102181836	PLEKHS1	1	0
TCONS_00099045	XLOC_063218	XLOC_063218	Novel_lncRNA	108635475	LOC108635475	1	0
TCONS_00099045	XLOC_063218	XLOC_063218	Novel_lncRNA	100860913	IGFBP1	1	0
TCONS_00099045	XLOC_063218	XLOC_063218	Novel_lncRNA	102180955	CCDC185	1	0
TCONS_00099045	XLOC_063218	XLOC_063218	Novel_lncRNA	108636278	LOC108636278	1	0
TCONS_00099045	XLOC_063218	XLOC_063218	Novel_lncRNA	108638450	LOC108638450	1	0
TCONS_00099045	XLOC_063218	XLOC_063218	Novel_lncRNA	102186722	ZBBX	1	0
TCONS_00099045	XLOC_063218	XLOC_063218	Novel_lncRNA	102179077	TEX13B	1	0
TCONS_00099045	XLOC_063218	XLOC_063218	Novel_lncRNA	108633268	LOC108633268	1	0
TCONS_00099045	XLOC_063218	XLOC_063218	Novel_lncRNA	102176079	C1H21orf58	1	0
TCONS_00099045	XLOC_063218	XLOC_063218	Novel_lncRNA	102170469	CCDC33	1	0
TCONS_00099045	XLOC_063218	XLOC_063218	Novel_lncRNA	102181476	C29H11orf86	1	0
TCONS_00099045	XLOC_063218	XLOC_063218	Novel_lncRNA	102180110	LOC102180110	1	0
TCONS_00099045	XLOC_063218	XLOC_063218	Novel_lncRNA	102191070	CABP7	1	0
TCONS_00099045	XLOC_063218	XLOC_063218	Novel_lncRNA	108637591	LOC108637591	1	0
TCONS_00099045	XLOC_063218	XLOC_063218	Novel_lncRNA	102191160	LOC102191160	1	0
TCONS_00099045	XLOC_063218	XLOC_063218	Novel_lncRNA	102185710	MYL7	1	0
TCONS_00099045	XLOC_063218	XLOC_063218	Novel_lncRNA	102187721	LYPD6B	1	1.84889e-32
TCONS_00099045	XLOC_063218	XLOC_063218	Novel_lncRNA	102168316	ZG16	1	1.84889e-32
TCONS_00099045	XLOC_063218	XLOC_063218	Novel_lncRNA	102169608	LOC102169608	1	1.84889e-32
TCONS_00099045	XLOC_063218	XLOC_063218	Novel_lncRNA	108637271	POU4F1	1	1.84889e-32
TCONS_00099045	XLOC_063218	XLOC_063218	Novel_lncRNA	102184387	CPO	1	1.84889e-32
TCONS_00099045	XLOC_063218	XLOC_063218	Novel_lncRNA	108636285	NKX3-2	1	1.84889e-32
TCONS_00099045	XLOC_063218	XLOC_063218	Novel_lncRNA	108638246	LOC108638246	1	1.84889e-32
TCONS_00099045	XLOC_063218	XLOC_063218	Novel_lncRNA	102168282	TTLL10	1	1.84889e-32
TCONS_00099045	XLOC_063218	XLOC_063218	Novel_lncRNA	102187559	LOC102187559	1	1.84889e-32
TCONS_00099045	XLOC_063218	XLOC_063218	Novel_lncRNA	102180500	CPNE6	1	1.84889e-32
TCONS_00099045	XLOC_063218	XLOC_063218	Novel_lncRNA	102168535	LOC102168535	1	7.39557e-32
TCONS_00099045	XLOC_063218	XLOC_063218	Novel_lncRNA	102179936	LOC102179936	1	7.39557e-32
TCONS_00099045	XLOC_063218	XLOC_063218	Novel_lncRNA	106503958	LOC106503958	1	7.39557e-32
TCONS_00099045	XLOC_063218	XLOC_063218	Novel_lncRNA	108638237	LOC108638237	1	7.39557e-32
TCONS_00099045	XLOC_063218	XLOC_063218	Novel_lncRNA	102183996	AGRP	1	7.39557e-32
TCONS_00099045	XLOC_063218	XLOC_063218	Novel_lncRNA	102180541	GRK7	1	7.39557e-32
TCONS_00099045	XLOC_063218	XLOC_063218	Novel_lncRNA	102185156	LOC102185156	1	7.39557e-32
TCONS_00099045	XLOC_063218	XLOC_063218	Novel_lncRNA	102179523	PCP4	1	7.39557e-32
TCONS_00099045	XLOC_063218	XLOC_063218	Novel_lncRNA	102190992	LOC102190992	1	7.39557e-32
TCONS_00099045	XLOC_063218	XLOC_063218	Novel_lncRNA	102184828	SLC30A8	1	7.39557e-32
TCONS_00099072	XLOC_063244	XLOC_063244	Novel_lncRNA	102173832	RLN3	1	0
TCONS_00099072	XLOC_063244	XLOC_063244	Novel_lncRNA	102186657	LOC102186657	1	0
TCONS_00099072	XLOC_063244	XLOC_063244	Novel_lncRNA	102188467	TRIM67	1	0
TCONS_00099072	XLOC_063244	XLOC_063244	Novel_lncRNA	102181195	DMC1	1	0
TCONS_00099072	XLOC_063244	XLOC_063244	Novel_lncRNA	102168535	LOC102168535	1	0
TCONS_00099072	XLOC_063244	XLOC_063244	Novel_lncRNA	102173783	LOC102173783	1	0
TCONS_00099072	XLOC_063244	XLOC_063244	Novel_lncRNA	102175964	LOC102175964	1	0
TCONS_00099072	XLOC_063244	XLOC_063244	Novel_lncRNA	102179409	KLK11	1	0
TCONS_00099072	XLOC_063244	XLOC_063244	Novel_lncRNA	102183170	NPHS2	1	0
TCONS_00099072	XLOC_063244	XLOC_063244	Novel_lncRNA	102177885	TLE6	1	0
TCONS_00099072	XLOC_063244	XLOC_063244	Novel_lncRNA	102178571	GMNC	1	0
TCONS_00099072	XLOC_063244	XLOC_063244	Novel_lncRNA	102177362	CES3	1	0
TCONS_00099072	XLOC_063244	XLOC_063244	Novel_lncRNA	102170014	TNFRSF17	1	0
TCONS_00099072	XLOC_063244	XLOC_063244	Novel_lncRNA	102188254	LOC102188254	1	0
TCONS_00099072	XLOC_063244	XLOC_063244	Novel_lncRNA	102186095	LMNTD2	1	0
TCONS_00099072	XLOC_063244	XLOC_063244	Novel_lncRNA	102176804	ANKRD60	1	0
TCONS_00099072	XLOC_063244	XLOC_063244	Novel_lncRNA	108633288	LOC108633288	1	0
TCONS_00099072	XLOC_063244	XLOC_063244	Novel_lncRNA	102169312	OC90	1	0
TCONS_00099072	XLOC_063244	XLOC_063244	Novel_lncRNA	108637736	OPN3	1	0
TCONS_00099072	XLOC_063244	XLOC_063244	Novel_lncRNA	106503958	LOC106503958	1	0
TCONS_00099072	XLOC_063244	XLOC_063244	Novel_lncRNA	102175925	LOC102175925	1	0
TCONS_00099072	XLOC_063244	XLOC_063244	Novel_lncRNA	108638237	LOC108638237	1	0
TCONS_00099072	XLOC_063244	XLOC_063244	Novel_lncRNA	108638408	IRX4	1	0
TCONS_00099072	XLOC_063244	XLOC_063244	Novel_lncRNA	102186556	LRGUK	1	0
TCONS_00099072	XLOC_063244	XLOC_063244	Novel_lncRNA	102183203	LOC102183203	1	0
TCONS_00099072	XLOC_063244	XLOC_063244	Novel_lncRNA	102172975	PIK3C2G	1	0
TCONS_00099072	XLOC_063244	XLOC_063244	Novel_lncRNA	102174637	F9	1	0
TCONS_00099072	XLOC_063244	XLOC_063244	Novel_lncRNA	108634850	LOC108634850	1	0
TCONS_00099072	XLOC_063244	XLOC_063244	Novel_lncRNA	102183996	AGRP	1	0
TCONS_00099072	XLOC_063244	XLOC_063244	Novel_lncRNA	102171720	GJB2	1	0
TCONS_00099072	XLOC_063244	XLOC_063244	Novel_lncRNA	102170234	LOC102170234	1	0
TCONS_00099072	XLOC_063244	XLOC_063244	Novel_lncRNA	102183581	LOC102183581	1	0
TCONS_00099072	XLOC_063244	XLOC_063244	Novel_lncRNA	102175286	LOC102175286	1	0
TCONS_00099072	XLOC_063244	XLOC_063244	Novel_lncRNA	102174635	SLC22A18	1	0
TCONS_00099072	XLOC_063244	XLOC_063244	Novel_lncRNA	106502327	LOC106502327	1	0
TCONS_00099072	XLOC_063244	XLOC_063244	Novel_lncRNA	108634074	LOC108634074	1	0
TCONS_00099072	XLOC_063244	XLOC_063244	Novel_lncRNA	102179133	PPY	1	0
TCONS_00099072	XLOC_063244	XLOC_063244	Novel_lncRNA	102180541	GRK7	1	0
TCONS_00099072	XLOC_063244	XLOC_063244	Novel_lncRNA	102190774	LOC102190774	1	0
TCONS_00099072	XLOC_063244	XLOC_063244	Novel_lncRNA	102171118	LOC102171118	1	0
TCONS_00099072	XLOC_063244	XLOC_063244	Novel_lncRNA	102170557	DNMT3L	1	0
TCONS_00099072	XLOC_063244	XLOC_063244	Novel_lncRNA	108638212	LOC108638212	1	0
TCONS_00099072	XLOC_063244	XLOC_063244	Novel_lncRNA	102186860	TEX43	1	0
TCONS_00099072	XLOC_063244	XLOC_063244	Novel_lncRNA	102175661	AWAT1	1	0
TCONS_00099072	XLOC_063244	XLOC_063244	Novel_lncRNA	108634508	LOC108634508	1	0
TCONS_00099072	XLOC_063244	XLOC_063244	Novel_lncRNA	102186205	LOC102186205	1	0
TCONS_00099072	XLOC_063244	XLOC_063244	Novel_lncRNA	102185156	LOC102185156	1	0
TCONS_00099072	XLOC_063244	XLOC_063244	Novel_lncRNA	102190989	B4GALNT2	1	0
TCONS_00099072	XLOC_063244	XLOC_063244	Novel_lncRNA	102173727	ZNF845	1	0
TCONS_00099072	XLOC_063244	XLOC_063244	Novel_lncRNA	102171649	RNF222	1	0
TCONS_00099072	XLOC_063244	XLOC_063244	Novel_lncRNA	102177323	MKRN3	1	0
TCONS_00099072	XLOC_063244	XLOC_063244	Novel_lncRNA	102189435	SOX14	1	0
TCONS_00099072	XLOC_063244	XLOC_063244	Novel_lncRNA	102189647	LIPK	1	0
TCONS_00099072	XLOC_063244	XLOC_063244	Novel_lncRNA	102170996	LOC102170996	1	0
TCONS_00099072	XLOC_063244	XLOC_063244	Novel_lncRNA	108636550	LOC108636550	1	0
TCONS_00099072	XLOC_063244	XLOC_063244	Novel_lncRNA	106503767	LOC106503767	1	0
TCONS_00099072	XLOC_063244	XLOC_063244	Novel_lncRNA	102168316	ZG16	1	0
TCONS_00099072	XLOC_063244	XLOC_063244	Novel_lncRNA	102190992	LOC102190992	1	0
TCONS_00099072	XLOC_063244	XLOC_063244	Novel_lncRNA	102180138	TMEM74B	1	0
TCONS_00099072	XLOC_063244	XLOC_063244	Novel_lncRNA	108637775	LOC108637775	1	0
TCONS_00099072	XLOC_063244	XLOC_063244	Novel_lncRNA	102169608	LOC102169608	1	0
TCONS_00099072	XLOC_063244	XLOC_063244	Novel_lncRNA	102172230	LOC102172230	1	0
TCONS_00099072	XLOC_063244	XLOC_063244	Novel_lncRNA	102171837	LOC102171837	1	0
TCONS_00099072	XLOC_063244	XLOC_063244	Novel_lncRNA	102187403	PRSS55	1	0
TCONS_00099072	XLOC_063244	XLOC_063244	Novel_lncRNA	102179983	MROH2B	1	0
TCONS_00099072	XLOC_063244	XLOC_063244	Novel_lncRNA	108637271	POU4F1	1	0
TCONS_00099072	XLOC_063244	XLOC_063244	Novel_lncRNA	102178106	KRT14	1	0
TCONS_00099072	XLOC_063244	XLOC_063244	Novel_lncRNA	102180349	NKX2-5	1	0
TCONS_00099072	XLOC_063244	XLOC_063244	Novel_lncRNA	102175416	NRSN2	1	0
TCONS_00099072	XLOC_063244	XLOC_063244	Novel_lncRNA	102175572	LOC102175572	1	0
TCONS_00099072	XLOC_063244	XLOC_063244	Novel_lncRNA	102184387	CPO	1	0
TCONS_00099072	XLOC_063244	XLOC_063244	Novel_lncRNA	102181974	NPPA	1	0
TCONS_00099072	XLOC_063244	XLOC_063244	Novel_lncRNA	108635390	LOC108635390	1	0
TCONS_00099072	XLOC_063244	XLOC_063244	Novel_lncRNA	102181836	PLEKHS1	1	0
TCONS_00099072	XLOC_063244	XLOC_063244	Novel_lncRNA	108636285	NKX3-2	1	0
TCONS_00099072	XLOC_063244	XLOC_063244	Novel_lncRNA	108638246	LOC108638246	1	0
TCONS_00099072	XLOC_063244	XLOC_063244	Novel_lncRNA	102184828	SLC30A8	1	0
TCONS_00099072	XLOC_063244	XLOC_063244	Novel_lncRNA	100860913	IGFBP1	1	0
TCONS_00099072	XLOC_063244	XLOC_063244	Novel_lncRNA	102180955	CCDC185	1	0
TCONS_00099072	XLOC_063244	XLOC_063244	Novel_lncRNA	108636278	LOC108636278	1	0
TCONS_00099072	XLOC_063244	XLOC_063244	Novel_lncRNA	102168282	TTLL10	1	0
TCONS_00099072	XLOC_063244	XLOC_063244	Novel_lncRNA	102186722	ZBBX	1	0
TCONS_00099072	XLOC_063244	XLOC_063244	Novel_lncRNA	102187559	LOC102187559	1	0
TCONS_00099072	XLOC_063244	XLOC_063244	Novel_lncRNA	102180500	CPNE6	1	0
TCONS_00099072	XLOC_063244	XLOC_063244	Novel_lncRNA	102179077	TEX13B	1	0
TCONS_00099072	XLOC_063244	XLOC_063244	Novel_lncRNA	108633268	LOC108633268	1	0
TCONS_00099072	XLOC_063244	XLOC_063244	Novel_lncRNA	102176079	C1H21orf58	1	0
TCONS_00099072	XLOC_063244	XLOC_063244	Novel_lncRNA	102170469	CCDC33	1	0
TCONS_00099072	XLOC_063244	XLOC_063244	Novel_lncRNA	102180110	LOC102180110	1	0
TCONS_00099072	XLOC_063244	XLOC_063244	Novel_lncRNA	102191070	CABP7	1	0
TCONS_00099072	XLOC_063244	XLOC_063244	Novel_lncRNA	102191160	LOC102191160	1	0
TCONS_00099072	XLOC_063244	XLOC_063244	Novel_lncRNA	102185710	MYL7	1	0
TCONS_00099072	XLOC_063244	XLOC_063244	Novel_lncRNA	102187721	LYPD6B	1	1.84889e-32
TCONS_00099072	XLOC_063244	XLOC_063244	Novel_lncRNA	102179936	LOC102179936	1	1.84889e-32
TCONS_00099072	XLOC_063244	XLOC_063244	Novel_lncRNA	102178541	SLCO6A1	1	1.84889e-32
TCONS_00099072	XLOC_063244	XLOC_063244	Novel_lncRNA	102177037	TEX33	1	1.84889e-32
TCONS_00099072	XLOC_063244	XLOC_063244	Novel_lncRNA	102175987	LOC102175987	1	1.84889e-32
TCONS_00099072	XLOC_063244	XLOC_063244	Novel_lncRNA	108635475	LOC108635475	1	1.84889e-32
TCONS_00099072	XLOC_063244	XLOC_063244	Novel_lncRNA	108638450	LOC108638450	1	1.84889e-32
TCONS_00099072	XLOC_063244	XLOC_063244	Novel_lncRNA	102181476	C29H11orf86	1	1.84889e-32
TCONS_00099072	XLOC_063244	XLOC_063244	Novel_lncRNA	108637591	LOC108637591	1	1.84889e-32
TCONS_00099072	XLOC_063244	XLOC_063244	Novel_lncRNA	102179523	PCP4	1	7.39557e-32
TCONS_00132942	XLOC_083468	XLOC_083468	Novel_lncRNA	102173832	RLN3	1	0
TCONS_00132942	XLOC_083468	XLOC_083468	Novel_lncRNA	102186657	LOC102186657	1	0
TCONS_00132942	XLOC_083468	XLOC_083468	Novel_lncRNA	102188467	TRIM67	1	0
TCONS_00132942	XLOC_083468	XLOC_083468	Novel_lncRNA	102181195	DMC1	1	0
TCONS_00132942	XLOC_083468	XLOC_083468	Novel_lncRNA	102168535	LOC102168535	1	0
TCONS_00132942	XLOC_083468	XLOC_083468	Novel_lncRNA	102173783	LOC102173783	1	0
TCONS_00132942	XLOC_083468	XLOC_083468	Novel_lncRNA	102175964	LOC102175964	1	0
TCONS_00132942	XLOC_083468	XLOC_083468	Novel_lncRNA	102179409	KLK11	1	0
TCONS_00132942	XLOC_083468	XLOC_083468	Novel_lncRNA	102183170	NPHS2	1	0
TCONS_00132942	XLOC_083468	XLOC_083468	Novel_lncRNA	102177885	TLE6	1	0
TCONS_00132942	XLOC_083468	XLOC_083468	Novel_lncRNA	102178571	GMNC	1	0
TCONS_00132942	XLOC_083468	XLOC_083468	Novel_lncRNA	102177362	CES3	1	0
TCONS_00132942	XLOC_083468	XLOC_083468	Novel_lncRNA	102170014	TNFRSF17	1	0
TCONS_00132942	XLOC_083468	XLOC_083468	Novel_lncRNA	102179936	LOC102179936	1	0
TCONS_00132942	XLOC_083468	XLOC_083468	Novel_lncRNA	102188254	LOC102188254	1	0
TCONS_00132942	XLOC_083468	XLOC_083468	Novel_lncRNA	102186095	LMNTD2	1	0
TCONS_00132942	XLOC_083468	XLOC_083468	Novel_lncRNA	102176804	ANKRD60	1	0
TCONS_00132942	XLOC_083468	XLOC_083468	Novel_lncRNA	108633288	LOC108633288	1	0
TCONS_00132942	XLOC_083468	XLOC_083468	Novel_lncRNA	102169312	OC90	1	0
TCONS_00132942	XLOC_083468	XLOC_083468	Novel_lncRNA	108637736	OPN3	1	0
TCONS_00132942	XLOC_083468	XLOC_083468	Novel_lncRNA	106503958	LOC106503958	1	0
TCONS_00132942	XLOC_083468	XLOC_083468	Novel_lncRNA	102175925	LOC102175925	1	0
TCONS_00132942	XLOC_083468	XLOC_083468	Novel_lncRNA	108638237	LOC108638237	1	0
TCONS_00132942	XLOC_083468	XLOC_083468	Novel_lncRNA	102178541	SLCO6A1	1	0
TCONS_00132942	XLOC_083468	XLOC_083468	Novel_lncRNA	108638408	IRX4	1	0
TCONS_00132942	XLOC_083468	XLOC_083468	Novel_lncRNA	102186556	LRGUK	1	0
TCONS_00132942	XLOC_083468	XLOC_083468	Novel_lncRNA	102183203	LOC102183203	1	0
TCONS_00132942	XLOC_083468	XLOC_083468	Novel_lncRNA	102172975	PIK3C2G	1	0
TCONS_00132942	XLOC_083468	XLOC_083468	Novel_lncRNA	102174637	F9	1	0
TCONS_00132942	XLOC_083468	XLOC_083468	Novel_lncRNA	108634850	LOC108634850	1	0
TCONS_00132942	XLOC_083468	XLOC_083468	Novel_lncRNA	102183996	AGRP	1	0
TCONS_00132942	XLOC_083468	XLOC_083468	Novel_lncRNA	102171720	GJB2	1	0
TCONS_00132942	XLOC_083468	XLOC_083468	Novel_lncRNA	102170234	LOC102170234	1	0
TCONS_00132942	XLOC_083468	XLOC_083468	Novel_lncRNA	102183581	LOC102183581	1	0
TCONS_00132942	XLOC_083468	XLOC_083468	Novel_lncRNA	102175286	LOC102175286	1	0
TCONS_00132942	XLOC_083468	XLOC_083468	Novel_lncRNA	102174635	SLC22A18	1	0
TCONS_00132942	XLOC_083468	XLOC_083468	Novel_lncRNA	102177037	TEX33	1	0
TCONS_00132942	XLOC_083468	XLOC_083468	Novel_lncRNA	106502327	LOC106502327	1	0
TCONS_00132942	XLOC_083468	XLOC_083468	Novel_lncRNA	108634074	LOC108634074	1	0
TCONS_00132942	XLOC_083468	XLOC_083468	Novel_lncRNA	102179133	PPY	1	0
TCONS_00132942	XLOC_083468	XLOC_083468	Novel_lncRNA	102190774	LOC102190774	1	0
TCONS_00132942	XLOC_083468	XLOC_083468	Novel_lncRNA	102171118	LOC102171118	1	0
TCONS_00132942	XLOC_083468	XLOC_083468	Novel_lncRNA	102170557	DNMT3L	1	0
TCONS_00132942	XLOC_083468	XLOC_083468	Novel_lncRNA	108638212	LOC108638212	1	0
TCONS_00132942	XLOC_083468	XLOC_083468	Novel_lncRNA	102186860	TEX43	1	0
TCONS_00132942	XLOC_083468	XLOC_083468	Novel_lncRNA	102175661	AWAT1	1	0
TCONS_00132942	XLOC_083468	XLOC_083468	Novel_lncRNA	102175987	LOC102175987	1	0
TCONS_00132942	XLOC_083468	XLOC_083468	Novel_lncRNA	108634508	LOC108634508	1	0
TCONS_00132942	XLOC_083468	XLOC_083468	Novel_lncRNA	102186205	LOC102186205	1	0
TCONS_00132942	XLOC_083468	XLOC_083468	Novel_lncRNA	102185156	LOC102185156	1	0
TCONS_00132942	XLOC_083468	XLOC_083468	Novel_lncRNA	102190989	B4GALNT2	1	0
TCONS_00132942	XLOC_083468	XLOC_083468	Novel_lncRNA	102171649	RNF222	1	0
TCONS_00132942	XLOC_083468	XLOC_083468	Novel_lncRNA	102179523	PCP4	1	0
TCONS_00132942	XLOC_083468	XLOC_083468	Novel_lncRNA	102177323	MKRN3	1	0
TCONS_00132942	XLOC_083468	XLOC_083468	Novel_lncRNA	102189435	SOX14	1	0
TCONS_00132942	XLOC_083468	XLOC_083468	Novel_lncRNA	102189647	LIPK	1	0
TCONS_00132942	XLOC_083468	XLOC_083468	Novel_lncRNA	102170996	LOC102170996	1	0
TCONS_00132942	XLOC_083468	XLOC_083468	Novel_lncRNA	108636550	LOC108636550	1	0
TCONS_00132942	XLOC_083468	XLOC_083468	Novel_lncRNA	106503767	LOC106503767	1	0
TCONS_00132942	XLOC_083468	XLOC_083468	Novel_lncRNA	102168316	ZG16	1	0
TCONS_00132942	XLOC_083468	XLOC_083468	Novel_lncRNA	102190992	LOC102190992	1	0
TCONS_00132942	XLOC_083468	XLOC_083468	Novel_lncRNA	102180138	TMEM74B	1	0
TCONS_00132942	XLOC_083468	XLOC_083468	Novel_lncRNA	108637775	LOC108637775	1	0
TCONS_00132942	XLOC_083468	XLOC_083468	Novel_lncRNA	102169608	LOC102169608	1	0
TCONS_00132942	XLOC_083468	XLOC_083468	Novel_lncRNA	102172230	LOC102172230	1	0
TCONS_00132942	XLOC_083468	XLOC_083468	Novel_lncRNA	102171837	LOC102171837	1	0
TCONS_00132942	XLOC_083468	XLOC_083468	Novel_lncRNA	102187403	PRSS55	1	0
TCONS_00132942	XLOC_083468	XLOC_083468	Novel_lncRNA	102179983	MROH2B	1	0
TCONS_00132942	XLOC_083468	XLOC_083468	Novel_lncRNA	102178106	KRT14	1	0
TCONS_00132942	XLOC_083468	XLOC_083468	Novel_lncRNA	102180349	NKX2-5	1	0
TCONS_00132942	XLOC_083468	XLOC_083468	Novel_lncRNA	102175416	NRSN2	1	0
TCONS_00132942	XLOC_083468	XLOC_083468	Novel_lncRNA	102175572	LOC102175572	1	0
TCONS_00132942	XLOC_083468	XLOC_083468	Novel_lncRNA	102184387	CPO	1	0
TCONS_00132942	XLOC_083468	XLOC_083468	Novel_lncRNA	102181974	NPPA	1	0
TCONS_00132942	XLOC_083468	XLOC_083468	Novel_lncRNA	108635390	LOC108635390	1	0
TCONS_00132942	XLOC_083468	XLOC_083468	Novel_lncRNA	102181836	PLEKHS1	1	0
TCONS_00132942	XLOC_083468	XLOC_083468	Novel_lncRNA	108635475	LOC108635475	1	0
TCONS_00132942	XLOC_083468	XLOC_083468	Novel_lncRNA	108638246	LOC108638246	1	0
TCONS_00132942	XLOC_083468	XLOC_083468	Novel_lncRNA	102184828	SLC30A8	1	0
TCONS_00132942	XLOC_083468	XLOC_083468	Novel_lncRNA	100860913	IGFBP1	1	0
TCONS_00132942	XLOC_083468	XLOC_083468	Novel_lncRNA	102180955	CCDC185	1	0
TCONS_00132942	XLOC_083468	XLOC_083468	Novel_lncRNA	108636278	LOC108636278	1	0
TCONS_00132942	XLOC_083468	XLOC_083468	Novel_lncRNA	102186722	ZBBX	1	0
TCONS_00132942	XLOC_083468	XLOC_083468	Novel_lncRNA	102187559	LOC102187559	1	0
TCONS_00132942	XLOC_083468	XLOC_083468	Novel_lncRNA	102180500	CPNE6	1	0
TCONS_00132942	XLOC_083468	XLOC_083468	Novel_lncRNA	102179077	TEX13B	1	0
TCONS_00132942	XLOC_083468	XLOC_083468	Novel_lncRNA	108633268	LOC108633268	1	0
TCONS_00132942	XLOC_083468	XLOC_083468	Novel_lncRNA	102176079	C1H21orf58	1	0
TCONS_00132942	XLOC_083468	XLOC_083468	Novel_lncRNA	102170469	CCDC33	1	0
TCONS_00132942	XLOC_083468	XLOC_083468	Novel_lncRNA	102180110	LOC102180110	1	0
TCONS_00132942	XLOC_083468	XLOC_083468	Novel_lncRNA	102191070	CABP7	1	0
TCONS_00132942	XLOC_083468	XLOC_083468	Novel_lncRNA	108637591	LOC108637591	1	0
TCONS_00132942	XLOC_083468	XLOC_083468	Novel_lncRNA	102191160	LOC102191160	1	0
TCONS_00132942	XLOC_083468	XLOC_083468	Novel_lncRNA	102185710	MYL7	1	0
TCONS_00132942	XLOC_083468	XLOC_083468	Novel_lncRNA	102187721	LYPD6B	1	1.84889e-32
TCONS_00132942	XLOC_083468	XLOC_083468	Novel_lncRNA	102173727	ZNF845	1	1.84889e-32
TCONS_00132942	XLOC_083468	XLOC_083468	Novel_lncRNA	108637271	POU4F1	1	1.84889e-32
TCONS_00132942	XLOC_083468	XLOC_083468	Novel_lncRNA	108636285	NKX3-2	1	1.84889e-32
TCONS_00132942	XLOC_083468	XLOC_083468	Novel_lncRNA	108638450	LOC108638450	1	1.84889e-32
TCONS_00132942	XLOC_083468	XLOC_083468	Novel_lncRNA	102181476	C29H11orf86	1	1.84889e-32
TCONS_00132942	XLOC_083468	XLOC_083468	Novel_lncRNA	102180541	GRK7	1	7.39557e-32
TCONS_00132942	XLOC_083468	XLOC_083468	Novel_lncRNA	102168282	TTLL10	1	7.39557e-32
TCONS_00133549	XLOC_083880	XLOC_083880	Novel_lncRNA	102173832	RLN3	1	0
TCONS_00133549	XLOC_083880	XLOC_083880	Novel_lncRNA	102186657	LOC102186657	1	0
TCONS_00133549	XLOC_083880	XLOC_083880	Novel_lncRNA	102188467	TRIM67	1	0
TCONS_00133549	XLOC_083880	XLOC_083880	Novel_lncRNA	102181195	DMC1	1	0
TCONS_00133549	XLOC_083880	XLOC_083880	Novel_lncRNA	102168535	LOC102168535	1	0
TCONS_00133549	XLOC_083880	XLOC_083880	Novel_lncRNA	102173783	LOC102173783	1	0
TCONS_00133549	XLOC_083880	XLOC_083880	Novel_lncRNA	102175964	LOC102175964	1	0
TCONS_00133549	XLOC_083880	XLOC_083880	Novel_lncRNA	102179409	KLK11	1	0
TCONS_00133549	XLOC_083880	XLOC_083880	Novel_lncRNA	102183170	NPHS2	1	0
TCONS_00133549	XLOC_083880	XLOC_083880	Novel_lncRNA	102177885	TLE6	1	0
TCONS_00133549	XLOC_083880	XLOC_083880	Novel_lncRNA	102178571	GMNC	1	0
TCONS_00133549	XLOC_083880	XLOC_083880	Novel_lncRNA	102177362	CES3	1	0
TCONS_00133549	XLOC_083880	XLOC_083880	Novel_lncRNA	102170014	TNFRSF17	1	0
TCONS_00133549	XLOC_083880	XLOC_083880	Novel_lncRNA	102187721	LYPD6B	1	0
TCONS_00133549	XLOC_083880	XLOC_083880	Novel_lncRNA	102179936	LOC102179936	1	0
TCONS_00133549	XLOC_083880	XLOC_083880	Novel_lncRNA	102188254	LOC102188254	1	0
TCONS_00133549	XLOC_083880	XLOC_083880	Novel_lncRNA	102186095	LMNTD2	1	0
TCONS_00133549	XLOC_083880	XLOC_083880	Novel_lncRNA	102176804	ANKRD60	1	0
TCONS_00133549	XLOC_083880	XLOC_083880	Novel_lncRNA	108633288	LOC108633288	1	0
TCONS_00133549	XLOC_083880	XLOC_083880	Novel_lncRNA	102169312	OC90	1	0
TCONS_00133549	XLOC_083880	XLOC_083880	Novel_lncRNA	108637736	OPN3	1	0
TCONS_00133549	XLOC_083880	XLOC_083880	Novel_lncRNA	106503958	LOC106503958	1	0
TCONS_00133549	XLOC_083880	XLOC_083880	Novel_lncRNA	102175925	LOC102175925	1	0
TCONS_00133549	XLOC_083880	XLOC_083880	Novel_lncRNA	108638237	LOC108638237	1	0
TCONS_00133549	XLOC_083880	XLOC_083880	Novel_lncRNA	102178541	SLCO6A1	1	0
TCONS_00133549	XLOC_083880	XLOC_083880	Novel_lncRNA	108638408	IRX4	1	0
TCONS_00133549	XLOC_083880	XLOC_083880	Novel_lncRNA	102186556	LRGUK	1	0
TCONS_00133549	XLOC_083880	XLOC_083880	Novel_lncRNA	102183203	LOC102183203	1	0
TCONS_00133549	XLOC_083880	XLOC_083880	Novel_lncRNA	102172975	PIK3C2G	1	0
TCONS_00133549	XLOC_083880	XLOC_083880	Novel_lncRNA	102174637	F9	1	0
TCONS_00133549	XLOC_083880	XLOC_083880	Novel_lncRNA	108634850	LOC108634850	1	0
TCONS_00133549	XLOC_083880	XLOC_083880	Novel_lncRNA	102183996	AGRP	1	0
TCONS_00133549	XLOC_083880	XLOC_083880	Novel_lncRNA	102171720	GJB2	1	0
TCONS_00133549	XLOC_083880	XLOC_083880	Novel_lncRNA	102170234	LOC102170234	1	0
TCONS_00133549	XLOC_083880	XLOC_083880	Novel_lncRNA	102183581	LOC102183581	1	0
TCONS_00133549	XLOC_083880	XLOC_083880	Novel_lncRNA	102175286	LOC102175286	1	0
TCONS_00133549	XLOC_083880	XLOC_083880	Novel_lncRNA	102174635	SLC22A18	1	0
TCONS_00133549	XLOC_083880	XLOC_083880	Novel_lncRNA	102177037	TEX33	1	0
TCONS_00133549	XLOC_083880	XLOC_083880	Novel_lncRNA	106502327	LOC106502327	1	0
TCONS_00133549	XLOC_083880	XLOC_083880	Novel_lncRNA	108634074	LOC108634074	1	0
TCONS_00133549	XLOC_083880	XLOC_083880	Novel_lncRNA	102179133	PPY	1	0
TCONS_00133549	XLOC_083880	XLOC_083880	Novel_lncRNA	102180541	GRK7	1	0
TCONS_00133549	XLOC_083880	XLOC_083880	Novel_lncRNA	102190774	LOC102190774	1	0
TCONS_00133549	XLOC_083880	XLOC_083880	Novel_lncRNA	102171118	LOC102171118	1	0
TCONS_00133549	XLOC_083880	XLOC_083880	Novel_lncRNA	102170557	DNMT3L	1	0
TCONS_00133549	XLOC_083880	XLOC_083880	Novel_lncRNA	108638212	LOC108638212	1	0
TCONS_00133549	XLOC_083880	XLOC_083880	Novel_lncRNA	102186860	TEX43	1	0
TCONS_00133549	XLOC_083880	XLOC_083880	Novel_lncRNA	102175661	AWAT1	1	0
TCONS_00133549	XLOC_083880	XLOC_083880	Novel_lncRNA	102175987	LOC102175987	1	0
TCONS_00133549	XLOC_083880	XLOC_083880	Novel_lncRNA	108634508	LOC108634508	1	0
TCONS_00133549	XLOC_083880	XLOC_083880	Novel_lncRNA	102186205	LOC102186205	1	0
TCONS_00133549	XLOC_083880	XLOC_083880	Novel_lncRNA	102185156	LOC102185156	1	0
TCONS_00133549	XLOC_083880	XLOC_083880	Novel_lncRNA	102190989	B4GALNT2	1	0
TCONS_00133549	XLOC_083880	XLOC_083880	Novel_lncRNA	102173727	ZNF845	1	0
TCONS_00133549	XLOC_083880	XLOC_083880	Novel_lncRNA	102171649	RNF222	1	0
TCONS_00133549	XLOC_083880	XLOC_083880	Novel_lncRNA	102179523	PCP4	1	0
TCONS_00133549	XLOC_083880	XLOC_083880	Novel_lncRNA	102177323	MKRN3	1	0
TCONS_00133549	XLOC_083880	XLOC_083880	Novel_lncRNA	102189435	SOX14	1	0
TCONS_00133549	XLOC_083880	XLOC_083880	Novel_lncRNA	102189647	LIPK	1	0
TCONS_00133549	XLOC_083880	XLOC_083880	Novel_lncRNA	102170996	LOC102170996	1	0
TCONS_00133549	XLOC_083880	XLOC_083880	Novel_lncRNA	108636550	LOC108636550	1	0
TCONS_00133549	XLOC_083880	XLOC_083880	Novel_lncRNA	106503767	LOC106503767	1	0
TCONS_00133549	XLOC_083880	XLOC_083880	Novel_lncRNA	102168316	ZG16	1	0
TCONS_00133549	XLOC_083880	XLOC_083880	Novel_lncRNA	102190992	LOC102190992	1	0
TCONS_00133549	XLOC_083880	XLOC_083880	Novel_lncRNA	102180138	TMEM74B	1	0
TCONS_00133549	XLOC_083880	XLOC_083880	Novel_lncRNA	108637775	LOC108637775	1	0
TCONS_00133549	XLOC_083880	XLOC_083880	Novel_lncRNA	102169608	LOC102169608	1	0
TCONS_00133549	XLOC_083880	XLOC_083880	Novel_lncRNA	102172230	LOC102172230	1	0
TCONS_00133549	XLOC_083880	XLOC_083880	Novel_lncRNA	102171837	LOC102171837	1	0
TCONS_00133549	XLOC_083880	XLOC_083880	Novel_lncRNA	102187403	PRSS55	1	0
TCONS_00133549	XLOC_083880	XLOC_083880	Novel_lncRNA	102179983	MROH2B	1	0
TCONS_00133549	XLOC_083880	XLOC_083880	Novel_lncRNA	108637271	POU4F1	1	0
TCONS_00133549	XLOC_083880	XLOC_083880	Novel_lncRNA	102178106	KRT14	1	0
TCONS_00133549	XLOC_083880	XLOC_083880	Novel_lncRNA	102180349	NKX2-5	1	0
TCONS_00133549	XLOC_083880	XLOC_083880	Novel_lncRNA	102175416	NRSN2	1	0
TCONS_00133549	XLOC_083880	XLOC_083880	Novel_lncRNA	102175572	LOC102175572	1	0
TCONS_00133549	XLOC_083880	XLOC_083880	Novel_lncRNA	102184387	CPO	1	0
TCONS_00133549	XLOC_083880	XLOC_083880	Novel_lncRNA	102181974	NPPA	1	0
TCONS_00133549	XLOC_083880	XLOC_083880	Novel_lncRNA	108635390	LOC108635390	1	0
TCONS_00133549	XLOC_083880	XLOC_083880	Novel_lncRNA	102181836	PLEKHS1	1	0
TCONS_00133549	XLOC_083880	XLOC_083880	Novel_lncRNA	108636285	NKX3-2	1	0
TCONS_00133549	XLOC_083880	XLOC_083880	Novel_lncRNA	108635475	LOC108635475	1	0
TCONS_00133549	XLOC_083880	XLOC_083880	Novel_lncRNA	108638246	LOC108638246	1	0
TCONS_00133549	XLOC_083880	XLOC_083880	Novel_lncRNA	102184828	SLC30A8	1	0
TCONS_00133549	XLOC_083880	XLOC_083880	Novel_lncRNA	100860913	IGFBP1	1	0
TCONS_00133549	XLOC_083880	XLOC_083880	Novel_lncRNA	102180955	CCDC185	1	0
TCONS_00133549	XLOC_083880	XLOC_083880	Novel_lncRNA	108636278	LOC108636278	1	0
TCONS_00133549	XLOC_083880	XLOC_083880	Novel_lncRNA	108638450	LOC108638450	1	0
TCONS_00133549	XLOC_083880	XLOC_083880	Novel_lncRNA	102168282	TTLL10	1	0
TCONS_00133549	XLOC_083880	XLOC_083880	Novel_lncRNA	102186722	ZBBX	1	0
TCONS_00133549	XLOC_083880	XLOC_083880	Novel_lncRNA	102187559	LOC102187559	1	0
TCONS_00133549	XLOC_083880	XLOC_083880	Novel_lncRNA	102180500	CPNE6	1	0
TCONS_00133549	XLOC_083880	XLOC_083880	Novel_lncRNA	102179077	TEX13B	1	0
TCONS_00133549	XLOC_083880	XLOC_083880	Novel_lncRNA	108633268	LOC108633268	1	0
TCONS_00133549	XLOC_083880	XLOC_083880	Novel_lncRNA	102176079	C1H21orf58	1	0
TCONS_00133549	XLOC_083880	XLOC_083880	Novel_lncRNA	102170469	CCDC33	1	0
TCONS_00133549	XLOC_083880	XLOC_083880	Novel_lncRNA	102181476	C29H11orf86	1	0
TCONS_00133549	XLOC_083880	XLOC_083880	Novel_lncRNA	102180110	LOC102180110	1	0
TCONS_00133549	XLOC_083880	XLOC_083880	Novel_lncRNA	102191070	CABP7	1	0
TCONS_00133549	XLOC_083880	XLOC_083880	Novel_lncRNA	108637591	LOC108637591	1	0
TCONS_00133549	XLOC_083880	XLOC_083880	Novel_lncRNA	102191160	LOC102191160	1	0
TCONS_00133549	XLOC_083880	XLOC_083880	Novel_lncRNA	102185710	MYL7	1	0
TCONS_00135003	XLOC_084795	XLOC_084795	Novel_lncRNA	102186657	LOC102186657	1	0
TCONS_00135003	XLOC_084795	XLOC_084795	Novel_lncRNA	102188467	TRIM67	1	0
TCONS_00135003	XLOC_084795	XLOC_084795	Novel_lncRNA	102181195	DMC1	1	0
TCONS_00135003	XLOC_084795	XLOC_084795	Novel_lncRNA	102168535	LOC102168535	1	0
TCONS_00135003	XLOC_084795	XLOC_084795	Novel_lncRNA	102173783	LOC102173783	1	0
TCONS_00135003	XLOC_084795	XLOC_084795	Novel_lncRNA	102175964	LOC102175964	1	0
TCONS_00135003	XLOC_084795	XLOC_084795	Novel_lncRNA	102179409	KLK11	1	0
TCONS_00135003	XLOC_084795	XLOC_084795	Novel_lncRNA	102183170	NPHS2	1	0
TCONS_00135003	XLOC_084795	XLOC_084795	Novel_lncRNA	102178571	GMNC	1	0
TCONS_00135003	XLOC_084795	XLOC_084795	Novel_lncRNA	102177362	CES3	1	0
TCONS_00135003	XLOC_084795	XLOC_084795	Novel_lncRNA	102170014	TNFRSF17	1	0
TCONS_00135003	XLOC_084795	XLOC_084795	Novel_lncRNA	102188254	LOC102188254	1	0
TCONS_00135003	XLOC_084795	XLOC_084795	Novel_lncRNA	102186095	LMNTD2	1	0
TCONS_00135003	XLOC_084795	XLOC_084795	Novel_lncRNA	102176804	ANKRD60	1	0
TCONS_00135003	XLOC_084795	XLOC_084795	Novel_lncRNA	108633288	LOC108633288	1	0
TCONS_00135003	XLOC_084795	XLOC_084795	Novel_lncRNA	102169312	OC90	1	0
TCONS_00135003	XLOC_084795	XLOC_084795	Novel_lncRNA	108637736	OPN3	1	0
TCONS_00135003	XLOC_084795	XLOC_084795	Novel_lncRNA	106503958	LOC106503958	1	0
TCONS_00135003	XLOC_084795	XLOC_084795	Novel_lncRNA	102175925	LOC102175925	1	0
TCONS_00135003	XLOC_084795	XLOC_084795	Novel_lncRNA	108638237	LOC108638237	1	0
TCONS_00135003	XLOC_084795	XLOC_084795	Novel_lncRNA	102178541	SLCO6A1	1	0
TCONS_00135003	XLOC_084795	XLOC_084795	Novel_lncRNA	108638408	IRX4	1	0
TCONS_00135003	XLOC_084795	XLOC_084795	Novel_lncRNA	102186556	LRGUK	1	0
TCONS_00135003	XLOC_084795	XLOC_084795	Novel_lncRNA	102183203	LOC102183203	1	0
TCONS_00135003	XLOC_084795	XLOC_084795	Novel_lncRNA	102172975	PIK3C2G	1	0
TCONS_00135003	XLOC_084795	XLOC_084795	Novel_lncRNA	102174637	F9	1	0
TCONS_00135003	XLOC_084795	XLOC_084795	Novel_lncRNA	108634850	LOC108634850	1	0
TCONS_00135003	XLOC_084795	XLOC_084795	Novel_lncRNA	102183996	AGRP	1	0
TCONS_00135003	XLOC_084795	XLOC_084795	Novel_lncRNA	102171720	GJB2	1	0
TCONS_00135003	XLOC_084795	XLOC_084795	Novel_lncRNA	102170234	LOC102170234	1	0
TCONS_00135003	XLOC_084795	XLOC_084795	Novel_lncRNA	102183581	LOC102183581	1	0
TCONS_00135003	XLOC_084795	XLOC_084795	Novel_lncRNA	102175286	LOC102175286	1	0
TCONS_00135003	XLOC_084795	XLOC_084795	Novel_lncRNA	102174635	SLC22A18	1	0
TCONS_00135003	XLOC_084795	XLOC_084795	Novel_lncRNA	102177037	TEX33	1	0
TCONS_00135003	XLOC_084795	XLOC_084795	Novel_lncRNA	106502327	LOC106502327	1	0
TCONS_00135003	XLOC_084795	XLOC_084795	Novel_lncRNA	108634074	LOC108634074	1	0
TCONS_00135003	XLOC_084795	XLOC_084795	Novel_lncRNA	102179133	PPY	1	0
TCONS_00135003	XLOC_084795	XLOC_084795	Novel_lncRNA	102180541	GRK7	1	0
TCONS_00135003	XLOC_084795	XLOC_084795	Novel_lncRNA	102190774	LOC102190774	1	0
TCONS_00135003	XLOC_084795	XLOC_084795	Novel_lncRNA	102171118	LOC102171118	1	0
TCONS_00135003	XLOC_084795	XLOC_084795	Novel_lncRNA	102170557	DNMT3L	1	0
TCONS_00135003	XLOC_084795	XLOC_084795	Novel_lncRNA	108638212	LOC108638212	1	0
TCONS_00135003	XLOC_084795	XLOC_084795	Novel_lncRNA	102186860	TEX43	1	0
TCONS_00135003	XLOC_084795	XLOC_084795	Novel_lncRNA	102175987	LOC102175987	1	0
TCONS_00135003	XLOC_084795	XLOC_084795	Novel_lncRNA	108634508	LOC108634508	1	0
TCONS_00135003	XLOC_084795	XLOC_084795	Novel_lncRNA	102186205	LOC102186205	1	0
TCONS_00135003	XLOC_084795	XLOC_084795	Novel_lncRNA	102185156	LOC102185156	1	0
TCONS_00135003	XLOC_084795	XLOC_084795	Novel_lncRNA	102190989	B4GALNT2	1	0
TCONS_00135003	XLOC_084795	XLOC_084795	Novel_lncRNA	102173727	ZNF845	1	0
TCONS_00135003	XLOC_084795	XLOC_084795	Novel_lncRNA	102171649	RNF222	1	0
TCONS_00135003	XLOC_084795	XLOC_084795	Novel_lncRNA	102179523	PCP4	1	0
TCONS_00135003	XLOC_084795	XLOC_084795	Novel_lncRNA	102177323	MKRN3	1	0
TCONS_00135003	XLOC_084795	XLOC_084795	Novel_lncRNA	102189435	SOX14	1	0
TCONS_00135003	XLOC_084795	XLOC_084795	Novel_lncRNA	102189647	LIPK	1	0
TCONS_00135003	XLOC_084795	XLOC_084795	Novel_lncRNA	102170996	LOC102170996	1	0
TCONS_00135003	XLOC_084795	XLOC_084795	Novel_lncRNA	108636550	LOC108636550	1	0
TCONS_00135003	XLOC_084795	XLOC_084795	Novel_lncRNA	106503767	LOC106503767	1	0
TCONS_00135003	XLOC_084795	XLOC_084795	Novel_lncRNA	102168316	ZG16	1	0
TCONS_00135003	XLOC_084795	XLOC_084795	Novel_lncRNA	102190992	LOC102190992	1	0
TCONS_00135003	XLOC_084795	XLOC_084795	Novel_lncRNA	102180138	TMEM74B	1	0
TCONS_00135003	XLOC_084795	XLOC_084795	Novel_lncRNA	108637775	LOC108637775	1	0
TCONS_00135003	XLOC_084795	XLOC_084795	Novel_lncRNA	102169608	LOC102169608	1	0
TCONS_00135003	XLOC_084795	XLOC_084795	Novel_lncRNA	102172230	LOC102172230	1	0
TCONS_00135003	XLOC_084795	XLOC_084795	Novel_lncRNA	102171837	LOC102171837	1	0
TCONS_00135003	XLOC_084795	XLOC_084795	Novel_lncRNA	102187403	PRSS55	1	0
TCONS_00135003	XLOC_084795	XLOC_084795	Novel_lncRNA	102179983	MROH2B	1	0
TCONS_00135003	XLOC_084795	XLOC_084795	Novel_lncRNA	102178106	KRT14	1	0
TCONS_00135003	XLOC_084795	XLOC_084795	Novel_lncRNA	102180349	NKX2-5	1	0
TCONS_00135003	XLOC_084795	XLOC_084795	Novel_lncRNA	102175416	NRSN2	1	0
TCONS_00135003	XLOC_084795	XLOC_084795	Novel_lncRNA	102175572	LOC102175572	1	0
TCONS_00135003	XLOC_084795	XLOC_084795	Novel_lncRNA	102184387	CPO	1	0
TCONS_00135003	XLOC_084795	XLOC_084795	Novel_lncRNA	102181974	NPPA	1	0
TCONS_00135003	XLOC_084795	XLOC_084795	Novel_lncRNA	108635390	LOC108635390	1	0
TCONS_00135003	XLOC_084795	XLOC_084795	Novel_lncRNA	102181836	PLEKHS1	1	0
TCONS_00135003	XLOC_084795	XLOC_084795	Novel_lncRNA	108638246	LOC108638246	1	0
TCONS_00135003	XLOC_084795	XLOC_084795	Novel_lncRNA	102184828	SLC30A8	1	0
TCONS_00135003	XLOC_084795	XLOC_084795	Novel_lncRNA	100860913	IGFBP1	1	0
TCONS_00135003	XLOC_084795	XLOC_084795	Novel_lncRNA	102180955	CCDC185	1	0
TCONS_00135003	XLOC_084795	XLOC_084795	Novel_lncRNA	108636278	LOC108636278	1	0
TCONS_00135003	XLOC_084795	XLOC_084795	Novel_lncRNA	108638450	LOC108638450	1	0
TCONS_00135003	XLOC_084795	XLOC_084795	Novel_lncRNA	102186722	ZBBX	1	0
TCONS_00135003	XLOC_084795	XLOC_084795	Novel_lncRNA	102187559	LOC102187559	1	0
TCONS_00135003	XLOC_084795	XLOC_084795	Novel_lncRNA	102180500	CPNE6	1	0
TCONS_00135003	XLOC_084795	XLOC_084795	Novel_lncRNA	102179077	TEX13B	1	0
TCONS_00135003	XLOC_084795	XLOC_084795	Novel_lncRNA	108633268	LOC108633268	1	0
TCONS_00135003	XLOC_084795	XLOC_084795	Novel_lncRNA	102176079	C1H21orf58	1	0
TCONS_00135003	XLOC_084795	XLOC_084795	Novel_lncRNA	102170469	CCDC33	1	0
TCONS_00135003	XLOC_084795	XLOC_084795	Novel_lncRNA	102181476	C29H11orf86	1	0
TCONS_00135003	XLOC_084795	XLOC_084795	Novel_lncRNA	102180110	LOC102180110	1	0
TCONS_00135003	XLOC_084795	XLOC_084795	Novel_lncRNA	102191070	CABP7	1	0
TCONS_00135003	XLOC_084795	XLOC_084795	Novel_lncRNA	108637591	LOC108637591	1	0
TCONS_00135003	XLOC_084795	XLOC_084795	Novel_lncRNA	102191160	LOC102191160	1	0
TCONS_00135003	XLOC_084795	XLOC_084795	Novel_lncRNA	102185710	MYL7	1	0
TCONS_00135003	XLOC_084795	XLOC_084795	Novel_lncRNA	102173832	RLN3	1	1.84889e-32
TCONS_00135003	XLOC_084795	XLOC_084795	Novel_lncRNA	102179936	LOC102179936	1	1.84889e-32
TCONS_00135003	XLOC_084795	XLOC_084795	Novel_lncRNA	102175661	AWAT1	1	1.84889e-32
TCONS_00135003	XLOC_084795	XLOC_084795	Novel_lncRNA	102168282	TTLL10	1	1.84889e-32
TCONS_00135003	XLOC_084795	XLOC_084795	Novel_lncRNA	102177885	TLE6	1	7.39557e-32
TCONS_00135003	XLOC_084795	XLOC_084795	Novel_lncRNA	102187721	LYPD6B	1	7.39557e-32
TCONS_00135003	XLOC_084795	XLOC_084795	Novel_lncRNA	108637271	POU4F1	1	7.39557e-32
TCONS_00135003	XLOC_084795	XLOC_084795	Novel_lncRNA	108636285	NKX3-2	1	7.39557e-32
TCONS_00135003	XLOC_084795	XLOC_084795	Novel_lncRNA	108635475	LOC108635475	1	7.39557e-32
TCONS_00154695	XLOC_097072	XLOC_097072	Novel_lncRNA	102173832	RLN3	1	0
TCONS_00154695	XLOC_097072	XLOC_097072	Novel_lncRNA	102186657	LOC102186657	1	0
TCONS_00154695	XLOC_097072	XLOC_097072	Novel_lncRNA	102188467	TRIM67	1	0
TCONS_00154695	XLOC_097072	XLOC_097072	Novel_lncRNA	102181195	DMC1	1	0
TCONS_00154695	XLOC_097072	XLOC_097072	Novel_lncRNA	102168535	LOC102168535	1	0
TCONS_00154695	XLOC_097072	XLOC_097072	Novel_lncRNA	102173783	LOC102173783	1	0
TCONS_00154695	XLOC_097072	XLOC_097072	Novel_lncRNA	102175964	LOC102175964	1	0
TCONS_00154695	XLOC_097072	XLOC_097072	Novel_lncRNA	102179409	KLK11	1	0
TCONS_00154695	XLOC_097072	XLOC_097072	Novel_lncRNA	102183170	NPHS2	1	0
TCONS_00154695	XLOC_097072	XLOC_097072	Novel_lncRNA	102177885	TLE6	1	0
TCONS_00154695	XLOC_097072	XLOC_097072	Novel_lncRNA	102178571	GMNC	1	0
TCONS_00154695	XLOC_097072	XLOC_097072	Novel_lncRNA	102177362	CES3	1	0
TCONS_00154695	XLOC_097072	XLOC_097072	Novel_lncRNA	102170014	TNFRSF17	1	0
TCONS_00154695	XLOC_097072	XLOC_097072	Novel_lncRNA	102179936	LOC102179936	1	0
TCONS_00154695	XLOC_097072	XLOC_097072	Novel_lncRNA	102188254	LOC102188254	1	0
TCONS_00154695	XLOC_097072	XLOC_097072	Novel_lncRNA	102186095	LMNTD2	1	0
TCONS_00154695	XLOC_097072	XLOC_097072	Novel_lncRNA	102176804	ANKRD60	1	0
TCONS_00154695	XLOC_097072	XLOC_097072	Novel_lncRNA	108633288	LOC108633288	1	0
TCONS_00154695	XLOC_097072	XLOC_097072	Novel_lncRNA	102169312	OC90	1	0
TCONS_00154695	XLOC_097072	XLOC_097072	Novel_lncRNA	108637736	OPN3	1	0
TCONS_00154695	XLOC_097072	XLOC_097072	Novel_lncRNA	106503958	LOC106503958	1	0
TCONS_00154695	XLOC_097072	XLOC_097072	Novel_lncRNA	102175925	LOC102175925	1	0
TCONS_00154695	XLOC_097072	XLOC_097072	Novel_lncRNA	108638237	LOC108638237	1	0
TCONS_00154695	XLOC_097072	XLOC_097072	Novel_lncRNA	102178541	SLCO6A1	1	0
TCONS_00154695	XLOC_097072	XLOC_097072	Novel_lncRNA	108638408	IRX4	1	0
TCONS_00154695	XLOC_097072	XLOC_097072	Novel_lncRNA	102186556	LRGUK	1	0
TCONS_00154695	XLOC_097072	XLOC_097072	Novel_lncRNA	102183203	LOC102183203	1	0
TCONS_00154695	XLOC_097072	XLOC_097072	Novel_lncRNA	102172975	PIK3C2G	1	0
TCONS_00154695	XLOC_097072	XLOC_097072	Novel_lncRNA	102174637	F9	1	0
TCONS_00154695	XLOC_097072	XLOC_097072	Novel_lncRNA	108634850	LOC108634850	1	0
TCONS_00154695	XLOC_097072	XLOC_097072	Novel_lncRNA	102183996	AGRP	1	0
TCONS_00154695	XLOC_097072	XLOC_097072	Novel_lncRNA	102171720	GJB2	1	0
TCONS_00154695	XLOC_097072	XLOC_097072	Novel_lncRNA	102170234	LOC102170234	1	0
TCONS_00154695	XLOC_097072	XLOC_097072	Novel_lncRNA	102183581	LOC102183581	1	0
TCONS_00154695	XLOC_097072	XLOC_097072	Novel_lncRNA	102175286	LOC102175286	1	0
TCONS_00154695	XLOC_097072	XLOC_097072	Novel_lncRNA	102174635	SLC22A18	1	0
TCONS_00154695	XLOC_097072	XLOC_097072	Novel_lncRNA	102177037	TEX33	1	0
TCONS_00154695	XLOC_097072	XLOC_097072	Novel_lncRNA	106502327	LOC106502327	1	0
TCONS_00154695	XLOC_097072	XLOC_097072	Novel_lncRNA	108634074	LOC108634074	1	0
TCONS_00154695	XLOC_097072	XLOC_097072	Novel_lncRNA	102179133	PPY	1	0
TCONS_00154695	XLOC_097072	XLOC_097072	Novel_lncRNA	102180541	GRK7	1	0
TCONS_00154695	XLOC_097072	XLOC_097072	Novel_lncRNA	102190774	LOC102190774	1	0
TCONS_00154695	XLOC_097072	XLOC_097072	Novel_lncRNA	102171118	LOC102171118	1	0
TCONS_00154695	XLOC_097072	XLOC_097072	Novel_lncRNA	102170557	DNMT3L	1	0
TCONS_00154695	XLOC_097072	XLOC_097072	Novel_lncRNA	108638212	LOC108638212	1	0
TCONS_00154695	XLOC_097072	XLOC_097072	Novel_lncRNA	102186860	TEX43	1	0
TCONS_00154695	XLOC_097072	XLOC_097072	Novel_lncRNA	102175661	AWAT1	1	0
TCONS_00154695	XLOC_097072	XLOC_097072	Novel_lncRNA	102175987	LOC102175987	1	0
TCONS_00154695	XLOC_097072	XLOC_097072	Novel_lncRNA	108634508	LOC108634508	1	0
TCONS_00154695	XLOC_097072	XLOC_097072	Novel_lncRNA	102186205	LOC102186205	1	0
TCONS_00154695	XLOC_097072	XLOC_097072	Novel_lncRNA	102185156	LOC102185156	1	0
TCONS_00154695	XLOC_097072	XLOC_097072	Novel_lncRNA	102190989	B4GALNT2	1	0
TCONS_00154695	XLOC_097072	XLOC_097072	Novel_lncRNA	102173727	ZNF845	1	0
TCONS_00154695	XLOC_097072	XLOC_097072	Novel_lncRNA	102171649	RNF222	1	0
TCONS_00154695	XLOC_097072	XLOC_097072	Novel_lncRNA	102179523	PCP4	1	0
TCONS_00154695	XLOC_097072	XLOC_097072	Novel_lncRNA	102177323	MKRN3	1	0
TCONS_00154695	XLOC_097072	XLOC_097072	Novel_lncRNA	102189435	SOX14	1	0
TCONS_00154695	XLOC_097072	XLOC_097072	Novel_lncRNA	102189647	LIPK	1	0
TCONS_00154695	XLOC_097072	XLOC_097072	Novel_lncRNA	102170996	LOC102170996	1	0
TCONS_00154695	XLOC_097072	XLOC_097072	Novel_lncRNA	108636550	LOC108636550	1	0
TCONS_00154695	XLOC_097072	XLOC_097072	Novel_lncRNA	106503767	LOC106503767	1	0
TCONS_00154695	XLOC_097072	XLOC_097072	Novel_lncRNA	102168316	ZG16	1	0
TCONS_00154695	XLOC_097072	XLOC_097072	Novel_lncRNA	102190992	LOC102190992	1	0
TCONS_00154695	XLOC_097072	XLOC_097072	Novel_lncRNA	102180138	TMEM74B	1	0
TCONS_00154695	XLOC_097072	XLOC_097072	Novel_lncRNA	108637775	LOC108637775	1	0
TCONS_00154695	XLOC_097072	XLOC_097072	Novel_lncRNA	102169608	LOC102169608	1	0
TCONS_00154695	XLOC_097072	XLOC_097072	Novel_lncRNA	102172230	LOC102172230	1	0
TCONS_00154695	XLOC_097072	XLOC_097072	Novel_lncRNA	102171837	LOC102171837	1	0
TCONS_00154695	XLOC_097072	XLOC_097072	Novel_lncRNA	102187403	PRSS55	1	0
TCONS_00154695	XLOC_097072	XLOC_097072	Novel_lncRNA	102179983	MROH2B	1	0
TCONS_00154695	XLOC_097072	XLOC_097072	Novel_lncRNA	108637271	POU4F1	1	0
TCONS_00154695	XLOC_097072	XLOC_097072	Novel_lncRNA	102178106	KRT14	1	0
TCONS_00154695	XLOC_097072	XLOC_097072	Novel_lncRNA	102180349	NKX2-5	1	0
TCONS_00154695	XLOC_097072	XLOC_097072	Novel_lncRNA	102175416	NRSN2	1	0
TCONS_00154695	XLOC_097072	XLOC_097072	Novel_lncRNA	102175572	LOC102175572	1	0
TCONS_00154695	XLOC_097072	XLOC_097072	Novel_lncRNA	102184387	CPO	1	0
TCONS_00154695	XLOC_097072	XLOC_097072	Novel_lncRNA	102181974	NPPA	1	0
TCONS_00154695	XLOC_097072	XLOC_097072	Novel_lncRNA	108635390	LOC108635390	1	0
TCONS_00154695	XLOC_097072	XLOC_097072	Novel_lncRNA	102181836	PLEKHS1	1	0
TCONS_00154695	XLOC_097072	XLOC_097072	Novel_lncRNA	108635475	LOC108635475	1	0
TCONS_00154695	XLOC_097072	XLOC_097072	Novel_lncRNA	108638246	LOC108638246	1	0
TCONS_00154695	XLOC_097072	XLOC_097072	Novel_lncRNA	102184828	SLC30A8	1	0
TCONS_00154695	XLOC_097072	XLOC_097072	Novel_lncRNA	100860913	IGFBP1	1	0
TCONS_00154695	XLOC_097072	XLOC_097072	Novel_lncRNA	102180955	CCDC185	1	0
TCONS_00154695	XLOC_097072	XLOC_097072	Novel_lncRNA	108636278	LOC108636278	1	0
TCONS_00154695	XLOC_097072	XLOC_097072	Novel_lncRNA	108638450	LOC108638450	1	0
TCONS_00154695	XLOC_097072	XLOC_097072	Novel_lncRNA	102168282	TTLL10	1	0
TCONS_00154695	XLOC_097072	XLOC_097072	Novel_lncRNA	102186722	ZBBX	1	0
TCONS_00154695	XLOC_097072	XLOC_097072	Novel_lncRNA	102187559	LOC102187559	1	0
TCONS_00154695	XLOC_097072	XLOC_097072	Novel_lncRNA	102180500	CPNE6	1	0
TCONS_00154695	XLOC_097072	XLOC_097072	Novel_lncRNA	102179077	TEX13B	1	0
TCONS_00154695	XLOC_097072	XLOC_097072	Novel_lncRNA	108633268	LOC108633268	1	0
TCONS_00154695	XLOC_097072	XLOC_097072	Novel_lncRNA	102176079	C1H21orf58	1	0
TCONS_00154695	XLOC_097072	XLOC_097072	Novel_lncRNA	102170469	CCDC33	1	0
TCONS_00154695	XLOC_097072	XLOC_097072	Novel_lncRNA	102181476	C29H11orf86	1	0
TCONS_00154695	XLOC_097072	XLOC_097072	Novel_lncRNA	102180110	LOC102180110	1	0
TCONS_00154695	XLOC_097072	XLOC_097072	Novel_lncRNA	102191070	CABP7	1	0
TCONS_00154695	XLOC_097072	XLOC_097072	Novel_lncRNA	108637591	LOC108637591	1	0
TCONS_00154695	XLOC_097072	XLOC_097072	Novel_lncRNA	102191160	LOC102191160	1	0
TCONS_00154695	XLOC_097072	XLOC_097072	Novel_lncRNA	102185710	MYL7	1	0
TCONS_00154695	XLOC_097072	XLOC_097072	Novel_lncRNA	102187721	LYPD6B	1	1.84889e-32
TCONS_00154695	XLOC_097072	XLOC_097072	Novel_lncRNA	108636285	NKX3-2	1	1.84889e-32
TCONS_00026838	102186180	IFRD1	Novel_lncRNA	102176559	OTOP2	1	1.24182e-20
TCONS_00026838	102186180	IFRD1	Novel_lncRNA	102172785	C4H7orf72	1	1.24182e-20
TCONS_00026838	102186180	IFRD1	Novel_lncRNA	102169028	CDH22	1	1.24182e-20
TCONS_00026838	102186180	IFRD1	Novel_lncRNA	102178903	LOC102178903	1	1.24182e-20
TCONS_00026838	102186180	IFRD1	Novel_lncRNA	106503578	LOC106503578	1	1.24182e-20
TCONS_00026838	102186180	IFRD1	Novel_lncRNA	102185583	LOC102185583	1	1.24182e-20
TCONS_00026838	102186180	IFRD1	Novel_lncRNA	102172672	MPP4	1	1.24182e-20
TCONS_00026838	102186180	IFRD1	Novel_lncRNA	102177135	LOC102177135	1	1.24182e-20
TCONS_00026838	102186180	IFRD1	Novel_lncRNA	108636256	LOC108636256	1	1.24182e-20
TCONS_00026838	102186180	IFRD1	Novel_lncRNA	108633226	PKP3	1	1.24182e-20
TCONS_00026838	102186180	IFRD1	Novel_lncRNA	102190182	GLYATL3	1	1.24182e-20
TCONS_00026838	102186180	IFRD1	Novel_lncRNA	108636779	LOC108636779	1	1.24182e-20
TCONS_00026838	102186180	IFRD1	Novel_lncRNA	102181979	ADAD2	1	1.24182e-20
TCONS_00026838	102186180	IFRD1	Novel_lncRNA	102178616	LOC102178616	1	1.24182e-20
TCONS_00026838	102186180	IFRD1	Novel_lncRNA	102168916	ABO	1	1.24182e-20
TCONS_00026838	102186180	IFRD1	Novel_lncRNA	102185483	LOC102185483	1	1.24182e-20
TCONS_00026838	102186180	IFRD1	Novel_lncRNA	102173362	LOC102173362	1	1.24182e-20
TCONS_00026838	102186180	IFRD1	Novel_lncRNA	108636136	PDE6H	1	1.24182e-20
TCONS_00026838	102186180	IFRD1	Novel_lncRNA	102190017	VAX1	1	1.24182e-20
TCONS_00026838	102186180	IFRD1	Novel_lncRNA	108638130	LOC108638130	1	1.24182e-20
TCONS_00026838	102186180	IFRD1	Novel_lncRNA	102190271	UMODL1	1	1.24182e-20
TCONS_00026838	102186180	IFRD1	Novel_lncRNA	102186370	GOT1L1	1	1.24182e-20
TCONS_00026838	102186180	IFRD1	Novel_lncRNA	102180236	LOC102180236	1	1.24182e-20
TCONS_00026838	102186180	IFRD1	Novel_lncRNA	102180695	LOC102180695	1	1.24182e-20
TCONS_00026838	102186180	IFRD1	Novel_lncRNA	102181743	LOC102181743	1	1.24182e-20
TCONS_00026838	102186180	IFRD1	Novel_lncRNA	106502413	FOXE1	1	1.24182e-20
TCONS_00026838	102186180	IFRD1	Novel_lncRNA	102174666	LOC102174666	1	1.24182e-20
TCONS_00026838	102186180	IFRD1	Novel_lncRNA	102172868	ZP4	1	1.24182e-20
TCONS_00026838	102186180	IFRD1	Novel_lncRNA	108634425	LOC108634425	1	1.24182e-20
TCONS_00026838	102186180	IFRD1	Novel_lncRNA	102179483	ADAM21	1	1.24182e-20
TCONS_00026838	102186180	IFRD1	Novel_lncRNA	102191620	GJD2	1	1.24182e-20
TCONS_00026838	102186180	IFRD1	Novel_lncRNA	102190769	LOC102190769	1	1.24182e-20
TCONS_00026838	102186180	IFRD1	Novel_lncRNA	102189550	NOBOX	1	1.24182e-20
TCONS_00026838	102186180	IFRD1	Novel_lncRNA	102178138	SOSTDC1	1	1.24182e-20
TCONS_00026838	102186180	IFRD1	Novel_lncRNA	102179730	AGR2	1	1.24182e-20
TCONS_00026838	102186180	IFRD1	Novel_lncRNA	102170658	ELAVL4	1	1.24182e-20
TCONS_00026838	102186180	IFRD1	Novel_lncRNA	102190363	FAM19A4	1	1.24182e-20
TCONS_00026838	102186180	IFRD1	Novel_lncRNA	106502423	LOC106502423	1	1.24182e-20
TCONS_00026838	102186180	IFRD1	Novel_lncRNA	102187564	CCDC83	1	1.24182e-20
TCONS_00026838	102186180	IFRD1	Novel_lncRNA	102171684	LOC102171684	1	1.24182e-20
TCONS_00026838	102186180	IFRD1	Novel_lncRNA	102172427	LOC102172427	1	1.24182e-20
TCONS_00026838	102186180	IFRD1	Novel_lncRNA	108636284	NKX6-1	1	1.24182e-20
TCONS_00026838	102186180	IFRD1	Novel_lncRNA	108637883	LOC108637883	1	1.24182e-20
TCONS_00026838	102186180	IFRD1	Novel_lncRNA	102187724	TNP1	1	1.24182e-20
TCONS_00026838	102186180	IFRD1	Novel_lncRNA	102176915	LOC102176915	1	1.24182e-20
TCONS_00026838	102186180	IFRD1	Novel_lncRNA	102170123	LOC102170123	1	1.24182e-20
TCONS_00026838	102186180	IFRD1	Novel_lncRNA	106502695	URAD	1	1.24182e-20
TCONS_00026838	102186180	IFRD1	Novel_lncRNA	102185619	CHST9	1	1.24182e-20
TCONS_00026838	102186180	IFRD1	Novel_lncRNA	102184477	CPB1	1	1.24182e-20
TCONS_00026838	102186180	IFRD1	Novel_lncRNA	102169509	LOC102169509	1	1.24182e-20
TCONS_00026838	102186180	IFRD1	Novel_lncRNA	102176958	LOC102176958	1	1.24182e-20
TCONS_00026838	102186180	IFRD1	Novel_lncRNA	102182143	SLC10A2	1	1.24182e-20
TCONS_00026838	102186180	IFRD1	Novel_lncRNA	102190859	CT83	1	1.24182e-20
TCONS_00026838	102186180	IFRD1	Novel_lncRNA	102177608	AFM	1	1.24182e-20
TCONS_00026838	102186180	IFRD1	Novel_lncRNA	102175550	TCERG1L	1	1.24182e-20
TCONS_00026838	102186180	IFRD1	Novel_lncRNA	102190637	IGF2BP1	1	1.24182e-20
TCONS_00026838	102186180	IFRD1	Novel_lncRNA	102191826	ACPT	1	1.24183e-20
TCONS_00026838	102186180	IFRD1	Novel_lncRNA	102173108	RAG1	1	1.24183e-20
TCONS_00026838	102186180	IFRD1	Novel_lncRNA	102184642	LOC102184642	1	1.24183e-20
TCONS_00026838	102186180	IFRD1	Novel_lncRNA	102190743	PTH2R	1	1.24183e-20
TCONS_00026838	102186180	IFRD1	Novel_lncRNA	102178189	HTR3A	1	1.24183e-20
TCONS_00026838	102186180	IFRD1	Novel_lncRNA	102184925	IL24	1	1.24183e-20
TCONS_00026838	102186180	IFRD1	Novel_lncRNA	102185009	C11H2orf78	1	1.24183e-20
TCONS_00026838	102186180	IFRD1	Novel_lncRNA	102168592	LOC102168592	1	1.24183e-20
TCONS_00026838	102186180	IFRD1	Novel_lncRNA	102168218	TM4SF20	1	1.24183e-20
TCONS_00026838	102186180	IFRD1	Novel_lncRNA	108635518	LOC108635518	1	1.24183e-20
TCONS_00026838	102186180	IFRD1	Novel_lncRNA	108638399	LOC108638399	1	1.24183e-20
TCONS_00026838	102186180	IFRD1	Novel_lncRNA	102187631	CNTNAP5	1	1.24183e-20
TCONS_00026838	102186180	IFRD1	Novel_lncRNA	108634235	LOC108634235	1	1.24183e-20
TCONS_00026838	102186180	IFRD1	Novel_lncRNA	102183951	PGLYRP2	1	1.24183e-20
TCONS_00026838	102186180	IFRD1	Novel_lncRNA	102178758	UPK1A	1	1.24183e-20
TCONS_00026838	102186180	IFRD1	Novel_lncRNA	102175547	LOC102175547	1	1.24183e-20
TCONS_00026838	102186180	IFRD1	Novel_lncRNA	102181698	C15H11orf63	1	1.24183e-20
TCONS_00026838	102186180	IFRD1	Novel_lncRNA	102173401	CNBD1	1	1.24183e-20
TCONS_00026838	102186180	IFRD1	Novel_lncRNA	102171049	ODAM	1	1.24183e-20
TCONS_00026838	102186180	IFRD1	Novel_lncRNA	106502757	AVP	1	1.24183e-20
TCONS_00026838	102186180	IFRD1	Novel_lncRNA	102176397	INHBC	1	1.24183e-20
TCONS_00026838	102186180	IFRD1	Novel_lncRNA	102190725	C18H19orf81	1	1.24183e-20
TCONS_00026838	102186180	IFRD1	Novel_lncRNA	102189543	EPHA10	1	1.24183e-20
TCONS_00026838	102186180	IFRD1	Novel_lncRNA	102186467	LOC102186467	1	1.24183e-20
TCONS_00026838	102186180	IFRD1	Novel_lncRNA	102190857	LOC102190857	1	1.24183e-20
TCONS_00026838	102186180	IFRD1	Novel_lncRNA	102183480	LOC102183480	1	1.24183e-20
TCONS_00026838	102186180	IFRD1	Novel_lncRNA	102185743	GLRA3	1	1.24183e-20
TCONS_00026838	102186180	IFRD1	Novel_lncRNA	102190544	LOC102190544	1	1.24183e-20
TCONS_00026838	102186180	IFRD1	Novel_lncRNA	102171403	FGF20	1	1.24183e-20
TCONS_00026838	102186180	IFRD1	Novel_lncRNA	102173055	LOC102173055	1	1.24183e-20
TCONS_00026838	102186180	IFRD1	Novel_lncRNA	102176719	PIWIL1	1	1.24183e-20
TCONS_00026838	102186180	IFRD1	Novel_lncRNA	106503845	RS1	1	1.24183e-20
TCONS_00026838	102186180	IFRD1	Novel_lncRNA	102175327	KRT35	1	1.24183e-20
TCONS_00026838	102186180	IFRD1	Novel_lncRNA	108634972	LOC108634972	1	1.24183e-20
TCONS_00026838	102186180	IFRD1	Novel_lncRNA	106502424	SPATA31C2	1	1.24183e-20
TCONS_00026838	102186180	IFRD1	Novel_lncRNA	102182220	THEG	1	1.24183e-20
TCONS_00026838	102186180	IFRD1	Novel_lncRNA	102181121	C8H9orf135	1	1.24183e-20
TCONS_00026838	102186180	IFRD1	Novel_lncRNA	102171271	LOC102171271	1	1.24183e-20
TCONS_00026838	102186180	IFRD1	Novel_lncRNA	102185934	FAM150A	1	1.24183e-20
TCONS_00026838	102186180	IFRD1	Novel_lncRNA	102174310	SULT1C2	1	1.24183e-20
TCONS_00026838	102186180	IFRD1	Novel_lncRNA	102171153	ULBP3	1	1.24183e-20
TCONS_00026838	102186180	IFRD1	Novel_lncRNA	102169380	LOC102169380	1	1.24183e-20
TCONS_00026838	102186180	IFRD1	Novel_lncRNA	102184756	HSPB9	1	1.24183e-20
TCONS_00026838	102186180	IFRD1	Novel_lncRNA	102177197	TMC3	1	1.24183e-20
TCONS_00026838	102186180	IFRD1	Novel_lncRNA	102178576	ZNF501	1	1.24183e-20
TCONS_00026838	102186180	IFRD1	Novel_lncRNA	106503294	LOC106503294	1	1.24183e-20
TCONS_00026838	102186180	IFRD1	Novel_lncRNA	108638080	LOC108638080	1	1.24183e-20
TCONS_00026838	102186180	IFRD1	Novel_lncRNA	102190498	LOC102190498	1	1.24183e-20
TCONS_00026838	102186180	IFRD1	Novel_lncRNA	108633274	LOC108633274	1	1.24183e-20
TCONS_00026838	102186180	IFRD1	Novel_lncRNA	102170785	SAXO1	1	1.24183e-20
TCONS_00026838	102186180	IFRD1	Novel_lncRNA	100861239	MC4R	1	1.24183e-20
TCONS_00026838	102186180	IFRD1	Novel_lncRNA	102170346	LOC102170346	1	1.24183e-20
TCONS_00026838	102186180	IFRD1	Novel_lncRNA	102180022	MAGEA10	1	1.24183e-20
TCONS_00026838	102186180	IFRD1	Novel_lncRNA	102185836	LOC102185836	1	1.24183e-20
TCONS_00026838	102186180	IFRD1	Novel_lncRNA	102181225	DSCAML1	1	1.24183e-20
TCONS_00026838	102186180	IFRD1	Novel_lncRNA	102175780	CCDC153	1	1.24183e-20
TCONS_00026838	102186180	IFRD1	Novel_lncRNA	102175823	HS3ST4	1	1.24183e-20
TCONS_00026838	102186180	IFRD1	Novel_lncRNA	102185900	LOC102185900	1	1.24183e-20
TCONS_00026838	102186180	IFRD1	Novel_lncRNA	102175233	TMEM132D	1	1.24183e-20
TCONS_00026838	102186180	IFRD1	Novel_lncRNA	102173806	OCM2	1	1.24183e-20
TCONS_00026838	102186180	IFRD1	Novel_lncRNA	102176787	SNCB	1	1.24183e-20
TCONS_00026838	102186180	IFRD1	Novel_lncRNA	102181973	ACCSL	1	1.24183e-20
TCONS_00026838	102186180	IFRD1	Novel_lncRNA	108635556	LOC108635556	1	1.24183e-20
TCONS_00026838	102186180	IFRD1	Novel_lncRNA	102178019	LCA5L	1	1.24183e-20
TCONS_00026838	102186180	IFRD1	Novel_lncRNA	102184779	PNLIPRP3	1	1.24183e-20
TCONS_00026838	102186180	IFRD1	Novel_lncRNA	102180419	TAT	1	1.24183e-20
TCONS_00026838	102186180	IFRD1	Novel_lncRNA	102185671	LOC102185671	1	1.24183e-20
TCONS_00026838	102186180	IFRD1	Novel_lncRNA	102190477	LOC102190477	1	1.24183e-20
TCONS_00026838	102186180	IFRD1	Novel_lncRNA	102170800	LOC102170800	1	1.24183e-20
TCONS_00026838	102186180	IFRD1	Novel_lncRNA	102190050	SNX31	1	1.24183e-20
TCONS_00026838	102186180	IFRD1	Novel_lncRNA	102176870	LOC102176870	1	1.24183e-20
TCONS_00026838	102186180	IFRD1	Novel_lncRNA	108634834	SPACA7	1	1.24183e-20
TCONS_00026838	102186180	IFRD1	Novel_lncRNA	108636120	CECR6	1	1.24183e-20
TCONS_00026838	102186180	IFRD1	Novel_lncRNA	102169619	LOC102169619	1	1.24183e-20
TCONS_00026838	102186180	IFRD1	Novel_lncRNA	102177144	AWAT2	1	1.24183e-20
TCONS_00026838	102186180	IFRD1	Novel_lncRNA	106502603	C11H2orf91	1	1.24183e-20
TCONS_00026838	102186180	IFRD1	Novel_lncRNA	108634826	LOC108634826	1	1.24183e-20
TCONS_00026838	102186180	IFRD1	Novel_lncRNA	108638089	LOC108638089	1	1.24183e-20
TCONS_00026838	102186180	IFRD1	Novel_lncRNA	102169006	FOXB2	1	1.24183e-20
TCONS_00026838	102186180	IFRD1	Novel_lncRNA	102189434	LOC102189434	1	1.24183e-20
TCONS_00073557	102170796	MYO16	Novel_lncRNA	102178461	LOC102178461	0.999988	2.28352e-10
TCONS_00134767	XLOC_084658	XLOC_084658	Novel_lncRNA	102179998	BTN3A3	0.999883	2.04298e-08
TCONS_00088675	100860822	CRSP-2	Novel_lncRNA	102170206	FGF4	0.999855	3.15348e-08
TCONS_00026838	102186180	IFRD1	Novel_lncRNA	102179049	IGSF5	0.999728	1.10778e-07
TCONS_00008012	XLOC_005237	XLOC_005237	Novel_lncRNA	102173832	RLN3	0.999662	1.71504e-07
TCONS_00008012	XLOC_005237	XLOC_005237	Novel_lncRNA	102186657	LOC102186657	0.999662	1.71504e-07
TCONS_00008012	XLOC_005237	XLOC_005237	Novel_lncRNA	102188467	TRIM67	0.999662	1.71504e-07
TCONS_00008012	XLOC_005237	XLOC_005237	Novel_lncRNA	102181195	DMC1	0.999662	1.71504e-07
TCONS_00008012	XLOC_005237	XLOC_005237	Novel_lncRNA	102168535	LOC102168535	0.999662	1.71504e-07
TCONS_00008012	XLOC_005237	XLOC_005237	Novel_lncRNA	102175964	LOC102175964	0.999662	1.71504e-07
TCONS_00008012	XLOC_005237	XLOC_005237	Novel_lncRNA	102179409	KLK11	0.999662	1.71504e-07
TCONS_00008012	XLOC_005237	XLOC_005237	Novel_lncRNA	102183170	NPHS2	0.999662	1.71504e-07
TCONS_00008012	XLOC_005237	XLOC_005237	Novel_lncRNA	102177885	TLE6	0.999662	1.71504e-07
TCONS_00008012	XLOC_005237	XLOC_005237	Novel_lncRNA	102178571	GMNC	0.999662	1.71504e-07
TCONS_00008012	XLOC_005237	XLOC_005237	Novel_lncRNA	102177362	CES3	0.999662	1.71504e-07
TCONS_00008012	XLOC_005237	XLOC_005237	Novel_lncRNA	102170014	TNFRSF17	0.999662	1.71504e-07
TCONS_00008012	XLOC_005237	XLOC_005237	Novel_lncRNA	102187721	LYPD6B	0.999662	1.71504e-07
TCONS_00008012	XLOC_005237	XLOC_005237	Novel_lncRNA	102179936	LOC102179936	0.999662	1.71504e-07
TCONS_00008012	XLOC_005237	XLOC_005237	Novel_lncRNA	102186095	LMNTD2	0.999662	1.71504e-07
TCONS_00008012	XLOC_005237	XLOC_005237	Novel_lncRNA	102176804	ANKRD60	0.999662	1.71504e-07
TCONS_00008012	XLOC_005237	XLOC_005237	Novel_lncRNA	108633288	LOC108633288	0.999662	1.71504e-07
TCONS_00008012	XLOC_005237	XLOC_005237	Novel_lncRNA	102169312	OC90	0.999662	1.71504e-07
TCONS_00008012	XLOC_005237	XLOC_005237	Novel_lncRNA	108637736	OPN3	0.999662	1.71504e-07
TCONS_00008012	XLOC_005237	XLOC_005237	Novel_lncRNA	106503958	LOC106503958	0.999662	1.71504e-07
TCONS_00008012	XLOC_005237	XLOC_005237	Novel_lncRNA	102175925	LOC102175925	0.999662	1.71504e-07
TCONS_00008012	XLOC_005237	XLOC_005237	Novel_lncRNA	108638237	LOC108638237	0.999662	1.71504e-07
TCONS_00008012	XLOC_005237	XLOC_005237	Novel_lncRNA	108634850	LOC108634850	0.999662	1.71504e-07
TCONS_00008012	XLOC_005237	XLOC_005237	Novel_lncRNA	108638408	IRX4	0.999662	1.71504e-07
TCONS_00008012	XLOC_005237	XLOC_005237	Novel_lncRNA	102186556	LRGUK	0.999662	1.71504e-07
TCONS_00008012	XLOC_005237	XLOC_005237	Novel_lncRNA	102183203	LOC102183203	0.999662	1.71504e-07
TCONS_00008012	XLOC_005237	XLOC_005237	Novel_lncRNA	102172975	PIK3C2G	0.999662	1.71504e-07
TCONS_00008012	XLOC_005237	XLOC_005237	Novel_lncRNA	102174637	F9	0.999662	1.71504e-07
TCONS_00008012	XLOC_005237	XLOC_005237	Novel_lncRNA	102178541	SLCO6A1	0.999662	1.71504e-07
TCONS_00008012	XLOC_005237	XLOC_005237	Novel_lncRNA	102183996	AGRP	0.999662	1.71504e-07
TCONS_00008012	XLOC_005237	XLOC_005237	Novel_lncRNA	102171720	GJB2	0.999662	1.71504e-07
TCONS_00008012	XLOC_005237	XLOC_005237	Novel_lncRNA	102170234	LOC102170234	0.999662	1.71504e-07
TCONS_00008012	XLOC_005237	XLOC_005237	Novel_lncRNA	102183581	LOC102183581	0.999662	1.71504e-07
TCONS_00008012	XLOC_005237	XLOC_005237	Novel_lncRNA	102175286	LOC102175286	0.999662	1.71504e-07
TCONS_00008012	XLOC_005237	XLOC_005237	Novel_lncRNA	102174635	SLC22A18	0.999662	1.71504e-07
TCONS_00008012	XLOC_005237	XLOC_005237	Novel_lncRNA	102177037	TEX33	0.999662	1.71504e-07
TCONS_00008012	XLOC_005237	XLOC_005237	Novel_lncRNA	106502327	LOC106502327	0.999662	1.71504e-07
TCONS_00008012	XLOC_005237	XLOC_005237	Novel_lncRNA	108634074	LOC108634074	0.999662	1.71504e-07
TCONS_00008012	XLOC_005237	XLOC_005237	Novel_lncRNA	108635475	LOC108635475	0.999662	1.71504e-07
TCONS_00008012	XLOC_005237	XLOC_005237	Novel_lncRNA	102179133	PPY	0.999662	1.71504e-07
TCONS_00008012	XLOC_005237	XLOC_005237	Novel_lncRNA	102180541	GRK7	0.999662	1.71504e-07
TCONS_00008012	XLOC_005237	XLOC_005237	Novel_lncRNA	102190774	LOC102190774	0.999662	1.71504e-07
TCONS_00008012	XLOC_005237	XLOC_005237	Novel_lncRNA	102171118	LOC102171118	0.999662	1.71504e-07
TCONS_00008012	XLOC_005237	XLOC_005237	Novel_lncRNA	102170557	DNMT3L	0.999662	1.71504e-07
TCONS_00008012	XLOC_005237	XLOC_005237	Novel_lncRNA	108638212	LOC108638212	0.999662	1.71504e-07
TCONS_00008012	XLOC_005237	XLOC_005237	Novel_lncRNA	102186860	TEX43	0.999662	1.71504e-07
TCONS_00008012	XLOC_005237	XLOC_005237	Novel_lncRNA	102175661	AWAT1	0.999662	1.71504e-07
TCONS_00008012	XLOC_005237	XLOC_005237	Novel_lncRNA	102175987	LOC102175987	0.999662	1.71504e-07
TCONS_00008012	XLOC_005237	XLOC_005237	Novel_lncRNA	102186205	LOC102186205	0.999662	1.71504e-07
TCONS_00008012	XLOC_005237	XLOC_005237	Novel_lncRNA	102185156	LOC102185156	0.999662	1.71504e-07
TCONS_00008012	XLOC_005237	XLOC_005237	Novel_lncRNA	102190989	B4GALNT2	0.999662	1.71504e-07
TCONS_00008012	XLOC_005237	XLOC_005237	Novel_lncRNA	102173727	ZNF845	0.999662	1.71504e-07
TCONS_00008012	XLOC_005237	XLOC_005237	Novel_lncRNA	102171649	RNF222	0.999662	1.71504e-07
TCONS_00008012	XLOC_005237	XLOC_005237	Novel_lncRNA	102179523	PCP4	0.999662	1.71504e-07
TCONS_00008012	XLOC_005237	XLOC_005237	Novel_lncRNA	102177323	MKRN3	0.999662	1.71504e-07
TCONS_00008012	XLOC_005237	XLOC_005237	Novel_lncRNA	102189435	SOX14	0.999662	1.71504e-07
TCONS_00008012	XLOC_005237	XLOC_005237	Novel_lncRNA	102189647	LIPK	0.999662	1.71504e-07
TCONS_00008012	XLOC_005237	XLOC_005237	Novel_lncRNA	108636550	LOC108636550	0.999662	1.71504e-07
TCONS_00008012	XLOC_005237	XLOC_005237	Novel_lncRNA	106503767	LOC106503767	0.999662	1.71504e-07
TCONS_00008012	XLOC_005237	XLOC_005237	Novel_lncRNA	102190992	LOC102190992	0.999662	1.71504e-07
TCONS_00008012	XLOC_005237	XLOC_005237	Novel_lncRNA	102180138	TMEM74B	0.999662	1.71504e-07
TCONS_00008012	XLOC_005237	XLOC_005237	Novel_lncRNA	108637775	LOC108637775	0.999662	1.71504e-07
TCONS_00008012	XLOC_005237	XLOC_005237	Novel_lncRNA	102169608	LOC102169608	0.999662	1.71504e-07
TCONS_00008012	XLOC_005237	XLOC_005237	Novel_lncRNA	102172230	LOC102172230	0.999662	1.71504e-07
TCONS_00008012	XLOC_005237	XLOC_005237	Novel_lncRNA	102171837	LOC102171837	0.999662	1.71504e-07
TCONS_00008012	XLOC_005237	XLOC_005237	Novel_lncRNA	102187403	PRSS55	0.999662	1.71504e-07
TCONS_00008012	XLOC_005237	XLOC_005237	Novel_lncRNA	102179983	MROH2B	0.999662	1.71504e-07
TCONS_00008012	XLOC_005237	XLOC_005237	Novel_lncRNA	108637271	POU4F1	0.999662	1.71504e-07
TCONS_00008012	XLOC_005237	XLOC_005237	Novel_lncRNA	102178106	KRT14	0.999662	1.71504e-07
TCONS_00008012	XLOC_005237	XLOC_005237	Novel_lncRNA	102180349	NKX2-5	0.999662	1.71504e-07
TCONS_00008012	XLOC_005237	XLOC_005237	Novel_lncRNA	102175572	LOC102175572	0.999662	1.71504e-07
TCONS_00008012	XLOC_005237	XLOC_005237	Novel_lncRNA	102184387	CPO	0.999662	1.71504e-07
TCONS_00008012	XLOC_005237	XLOC_005237	Novel_lncRNA	102181974	NPPA	0.999662	1.71504e-07
TCONS_00008012	XLOC_005237	XLOC_005237	Novel_lncRNA	108635390	LOC108635390	0.999662	1.71504e-07
TCONS_00008012	XLOC_005237	XLOC_005237	Novel_lncRNA	102181836	PLEKHS1	0.999662	1.71504e-07
TCONS_00008012	XLOC_005237	XLOC_005237	Novel_lncRNA	108636285	NKX3-2	0.999662	1.71504e-07
TCONS_00008012	XLOC_005237	XLOC_005237	Novel_lncRNA	102188254	LOC102188254	0.999662	1.71504e-07
TCONS_00008012	XLOC_005237	XLOC_005237	Novel_lncRNA	108638246	LOC108638246	0.999662	1.71504e-07
TCONS_00008012	XLOC_005237	XLOC_005237	Novel_lncRNA	102184828	SLC30A8	0.999662	1.71504e-07
TCONS_00008012	XLOC_005237	XLOC_005237	Novel_lncRNA	100860913	IGFBP1	0.999662	1.71504e-07
TCONS_00008012	XLOC_005237	XLOC_005237	Novel_lncRNA	102180955	CCDC185	0.999662	1.71504e-07
TCONS_00008012	XLOC_005237	XLOC_005237	Novel_lncRNA	102173783	LOC102173783	0.999662	1.71504e-07
TCONS_00008012	XLOC_005237	XLOC_005237	Novel_lncRNA	108636278	LOC108636278	0.999662	1.71504e-07
TCONS_00008012	XLOC_005237	XLOC_005237	Novel_lncRNA	108638450	LOC108638450	0.999662	1.71504e-07
TCONS_00008012	XLOC_005237	XLOC_005237	Novel_lncRNA	102168282	TTLL10	0.999662	1.71504e-07
TCONS_00008012	XLOC_005237	XLOC_005237	Novel_lncRNA	102186722	ZBBX	0.999662	1.71504e-07
TCONS_00008012	XLOC_005237	XLOC_005237	Novel_lncRNA	102187559	LOC102187559	0.999662	1.71504e-07
TCONS_00008012	XLOC_005237	XLOC_005237	Novel_lncRNA	102180500	CPNE6	0.999662	1.71504e-07
TCONS_00008012	XLOC_005237	XLOC_005237	Novel_lncRNA	102179077	TEX13B	0.999662	1.71504e-07
TCONS_00008012	XLOC_005237	XLOC_005237	Novel_lncRNA	108633268	LOC108633268	0.999662	1.71504e-07
TCONS_00008012	XLOC_005237	XLOC_005237	Novel_lncRNA	102176079	C1H21orf58	0.999662	1.71504e-07
TCONS_00008012	XLOC_005237	XLOC_005237	Novel_lncRNA	102170469	CCDC33	0.999662	1.71504e-07
TCONS_00008012	XLOC_005237	XLOC_005237	Novel_lncRNA	102181476	C29H11orf86	0.999662	1.71504e-07
TCONS_00008012	XLOC_005237	XLOC_005237	Novel_lncRNA	102180110	LOC102180110	0.999662	1.71504e-07
TCONS_00008012	XLOC_005237	XLOC_005237	Novel_lncRNA	102191070	CABP7	0.999662	1.71504e-07
TCONS_00008012	XLOC_005237	XLOC_005237	Novel_lncRNA	102170996	LOC102170996	0.999662	1.71504e-07
TCONS_00008012	XLOC_005237	XLOC_005237	Novel_lncRNA	108637591	LOC108637591	0.999662	1.71504e-07
TCONS_00008012	XLOC_005237	XLOC_005237	Novel_lncRNA	102168316	ZG16	0.999662	1.71504e-07
TCONS_00008012	XLOC_005237	XLOC_005237	Novel_lncRNA	102175416	NRSN2	0.999662	1.71504e-07
TCONS_00008012	XLOC_005237	XLOC_005237	Novel_lncRNA	108634508	LOC108634508	0.999662	1.71504e-07
TCONS_00008012	XLOC_005237	XLOC_005237	Novel_lncRNA	102191160	LOC102191160	0.999662	1.71504e-07
TCONS_00008012	XLOC_005237	XLOC_005237	Novel_lncRNA	102185710	MYL7	0.999662	1.71504e-07
TCONS_00124841	108638635	MUSTN1	Novel_lncRNA	102187007	XIRP1	0.999617	2.19494e-07
TCONS_00041415	XLOC_026378	XLOC_026378	Novel_lncRNA	102170339	MMP12	0.999607	2.31673e-07
TCONS_00026838	102186180	IFRD1	Novel_lncRNA	102189132	SLC9A4	0.999511	3.58009e-07
TCONS_00026838	102186180	IFRD1	Novel_lncRNA	102185389	ANGPTL7	0.99949	3.90114e-07
XR_001917947.1	102184972	LOC102184972	Annotated_lncRNA	102189132	SLC9A4	0.999383	5.71368e-07
TCONS_00150002	102169739	KCNJ5	Novel_lncRNA	102183273	CKMT1A	0.999379	5.77767e-07
TCONS_00124841	108638635	MUSTN1	Novel_lncRNA	102178357	VCP	0.999229	8.90366e-07
TCONS_00121767	102189162	ABHD2	Novel_lncRNA	102180275	C24H18orf63	0.999183	1.00216e-06
TCONS_00028249	XLOC_017916	XLOC_017916	Novel_lncRNA	102188467	TRIM67	0.999139	1.11219e-06
TCONS_00028249	XLOC_017916	XLOC_017916	Novel_lncRNA	102181195	DMC1	0.999139	1.11219e-06
TCONS_00028249	XLOC_017916	XLOC_017916	Novel_lncRNA	102168535	LOC102168535	0.999139	1.11219e-06
TCONS_00028249	XLOC_017916	XLOC_017916	Novel_lncRNA	102175964	LOC102175964	0.999139	1.11219e-06
TCONS_00028249	XLOC_017916	XLOC_017916	Novel_lncRNA	102179409	KLK11	0.999139	1.11219e-06
TCONS_00028249	XLOC_017916	XLOC_017916	Novel_lncRNA	102183170	NPHS2	0.999139	1.11219e-06
TCONS_00028249	XLOC_017916	XLOC_017916	Novel_lncRNA	102178571	GMNC	0.999139	1.11219e-06
TCONS_00028249	XLOC_017916	XLOC_017916	Novel_lncRNA	102177362	CES3	0.999139	1.11219e-06
TCONS_00028249	XLOC_017916	XLOC_017916	Novel_lncRNA	102188254	LOC102188254	0.999139	1.11219e-06
TCONS_00028249	XLOC_017916	XLOC_017916	Novel_lncRNA	102186095	LMNTD2	0.999139	1.11219e-06
TCONS_00028249	XLOC_017916	XLOC_017916	Novel_lncRNA	102176804	ANKRD60	0.999139	1.11219e-06
TCONS_00028249	XLOC_017916	XLOC_017916	Novel_lncRNA	108633288	LOC108633288	0.999139	1.11219e-06
TCONS_00028249	XLOC_017916	XLOC_017916	Novel_lncRNA	102169312	OC90	0.999139	1.11219e-06
TCONS_00028249	XLOC_017916	XLOC_017916	Novel_lncRNA	102175925	LOC102175925	0.999139	1.11219e-06
TCONS_00028249	XLOC_017916	XLOC_017916	Novel_lncRNA	108634850	LOC108634850	0.999139	1.11219e-06
TCONS_00028249	XLOC_017916	XLOC_017916	Novel_lncRNA	108638408	IRX4	0.999139	1.11219e-06
TCONS_00028249	XLOC_017916	XLOC_017916	Novel_lncRNA	102183203	LOC102183203	0.999139	1.11219e-06
TCONS_00028249	XLOC_017916	XLOC_017916	Novel_lncRNA	102171720	GJB2	0.999139	1.11219e-06
TCONS_00028249	XLOC_017916	XLOC_017916	Novel_lncRNA	102170234	LOC102170234	0.999139	1.11219e-06
TCONS_00028249	XLOC_017916	XLOC_017916	Novel_lncRNA	102183581	LOC102183581	0.999139	1.11219e-06
TCONS_00028249	XLOC_017916	XLOC_017916	Novel_lncRNA	102174635	SLC22A18	0.999139	1.11219e-06
TCONS_00028249	XLOC_017916	XLOC_017916	Novel_lncRNA	102177037	TEX33	0.999139	1.11219e-06
TCONS_00028249	XLOC_017916	XLOC_017916	Novel_lncRNA	108634074	LOC108634074	0.999139	1.11219e-06
TCONS_00028249	XLOC_017916	XLOC_017916	Novel_lncRNA	102179133	PPY	0.999139	1.11219e-06
TCONS_00028249	XLOC_017916	XLOC_017916	Novel_lncRNA	102190774	LOC102190774	0.999139	1.11219e-06
TCONS_00028249	XLOC_017916	XLOC_017916	Novel_lncRNA	102170557	DNMT3L	0.999139	1.11219e-06
TCONS_00028249	XLOC_017916	XLOC_017916	Novel_lncRNA	108638212	LOC108638212	0.999139	1.11219e-06
TCONS_00028249	XLOC_017916	XLOC_017916	Novel_lncRNA	102186205	LOC102186205	0.999139	1.11219e-06
TCONS_00028249	XLOC_017916	XLOC_017916	Novel_lncRNA	102190989	B4GALNT2	0.999139	1.11219e-06
TCONS_00028249	XLOC_017916	XLOC_017916	Novel_lncRNA	102171649	RNF222	0.999139	1.11219e-06
TCONS_00028249	XLOC_017916	XLOC_017916	Novel_lncRNA	102177323	MKRN3	0.999139	1.11219e-06
TCONS_00028249	XLOC_017916	XLOC_017916	Novel_lncRNA	102189435	SOX14	0.999139	1.11219e-06
TCONS_00028249	XLOC_017916	XLOC_017916	Novel_lncRNA	102189647	LIPK	0.999139	1.11219e-06
TCONS_00028249	XLOC_017916	XLOC_017916	Novel_lncRNA	108636550	LOC108636550	0.999139	1.11219e-06
TCONS_00028249	XLOC_017916	XLOC_017916	Novel_lncRNA	102174637	F9	0.999139	1.11219e-06
TCONS_00028249	XLOC_017916	XLOC_017916	Novel_lncRNA	102168316	ZG16	0.999139	1.11219e-06
TCONS_00028249	XLOC_017916	XLOC_017916	Novel_lncRNA	108637775	LOC108637775	0.999139	1.11219e-06
TCONS_00028249	XLOC_017916	XLOC_017916	Novel_lncRNA	102172230	LOC102172230	0.999139	1.11219e-06
TCONS_00028249	XLOC_017916	XLOC_017916	Novel_lncRNA	102171837	LOC102171837	0.999139	1.11219e-06
TCONS_00028249	XLOC_017916	XLOC_017916	Novel_lncRNA	102187403	PRSS55	0.999139	1.11219e-06
TCONS_00028249	XLOC_017916	XLOC_017916	Novel_lncRNA	102179983	MROH2B	0.999139	1.11219e-06
TCONS_00028249	XLOC_017916	XLOC_017916	Novel_lncRNA	102178106	KRT14	0.999139	1.11219e-06
TCONS_00028249	XLOC_017916	XLOC_017916	Novel_lncRNA	102180349	NKX2-5	0.999139	1.11219e-06
TCONS_00028249	XLOC_017916	XLOC_017916	Novel_lncRNA	102175416	NRSN2	0.999139	1.11219e-06
TCONS_00028249	XLOC_017916	XLOC_017916	Novel_lncRNA	102175572	LOC102175572	0.999139	1.11219e-06
TCONS_00028249	XLOC_017916	XLOC_017916	Novel_lncRNA	102181974	NPPA	0.999139	1.11219e-06
TCONS_00028249	XLOC_017916	XLOC_017916	Novel_lncRNA	108635390	LOC108635390	0.999139	1.11219e-06
TCONS_00028249	XLOC_017916	XLOC_017916	Novel_lncRNA	102181836	PLEKHS1	0.999139	1.11219e-06
TCONS_00028249	XLOC_017916	XLOC_017916	Novel_lncRNA	108635475	LOC108635475	0.999139	1.11219e-06
TCONS_00028249	XLOC_017916	XLOC_017916	Novel_lncRNA	102184828	SLC30A8	0.999139	1.11219e-06
TCONS_00028249	XLOC_017916	XLOC_017916	Novel_lncRNA	100860913	IGFBP1	0.999139	1.11219e-06
TCONS_00028249	XLOC_017916	XLOC_017916	Novel_lncRNA	102180955	CCDC185	0.999139	1.11219e-06
TCONS_00028249	XLOC_017916	XLOC_017916	Novel_lncRNA	102173783	LOC102173783	0.999139	1.11219e-06
TCONS_00028249	XLOC_017916	XLOC_017916	Novel_lncRNA	102186722	ZBBX	0.999139	1.11219e-06
TCONS_00028249	XLOC_017916	XLOC_017916	Novel_lncRNA	102187559	LOC102187559	0.999139	1.11219e-06
TCONS_00028249	XLOC_017916	XLOC_017916	Novel_lncRNA	102180500	CPNE6	0.999139	1.11219e-06
TCONS_00028249	XLOC_017916	XLOC_017916	Novel_lncRNA	102179077	TEX13B	0.999139	1.11219e-06
TCONS_00028249	XLOC_017916	XLOC_017916	Novel_lncRNA	108633268	LOC108633268	0.999139	1.11219e-06
TCONS_00028249	XLOC_017916	XLOC_017916	Novel_lncRNA	102176079	C1H21orf58	0.999139	1.11219e-06
TCONS_00028249	XLOC_017916	XLOC_017916	Novel_lncRNA	102181476	C29H11orf86	0.999139	1.11219e-06
TCONS_00028249	XLOC_017916	XLOC_017916	Novel_lncRNA	102180110	LOC102180110	0.999139	1.11219e-06
TCONS_00028249	XLOC_017916	XLOC_017916	Novel_lncRNA	102191070	CABP7	0.999139	1.11219e-06
TCONS_00028249	XLOC_017916	XLOC_017916	Novel_lncRNA	102191160	LOC102191160	0.999139	1.11219e-06
TCONS_00028249	XLOC_017916	XLOC_017916	Novel_lncRNA	102185710	MYL7	0.999139	1.11219e-06
TCONS_00028249	XLOC_017916	XLOC_017916	Novel_lncRNA	102173832	RLN3	0.999139	1.11219e-06
TCONS_00028249	XLOC_017916	XLOC_017916	Novel_lncRNA	102186657	LOC102186657	0.999139	1.11219e-06
TCONS_00028249	XLOC_017916	XLOC_017916	Novel_lncRNA	102177885	TLE6	0.999139	1.11219e-06
TCONS_00028249	XLOC_017916	XLOC_017916	Novel_lncRNA	102170014	TNFRSF17	0.999139	1.11219e-06
TCONS_00028249	XLOC_017916	XLOC_017916	Novel_lncRNA	102187721	LYPD6B	0.999139	1.11219e-06
TCONS_00028249	XLOC_017916	XLOC_017916	Novel_lncRNA	102179936	LOC102179936	0.999139	1.11219e-06
TCONS_00028249	XLOC_017916	XLOC_017916	Novel_lncRNA	108637736	OPN3	0.999139	1.11219e-06
TCONS_00028249	XLOC_017916	XLOC_017916	Novel_lncRNA	106503958	LOC106503958	0.999139	1.11219e-06
TCONS_00028249	XLOC_017916	XLOC_017916	Novel_lncRNA	108638237	LOC108638237	0.999139	1.11219e-06
TCONS_00028249	XLOC_017916	XLOC_017916	Novel_lncRNA	102186556	LRGUK	0.999139	1.11219e-06
TCONS_00028249	XLOC_017916	XLOC_017916	Novel_lncRNA	102172975	PIK3C2G	0.999139	1.11219e-06
TCONS_00028249	XLOC_017916	XLOC_017916	Novel_lncRNA	102178541	SLCO6A1	0.999139	1.11219e-06
TCONS_00028249	XLOC_017916	XLOC_017916	Novel_lncRNA	102183996	AGRP	0.999139	1.11219e-06
TCONS_00028249	XLOC_017916	XLOC_017916	Novel_lncRNA	102175286	LOC102175286	0.999139	1.11219e-06
TCONS_00028249	XLOC_017916	XLOC_017916	Novel_lncRNA	106502327	LOC106502327	0.999139	1.11219e-06
TCONS_00028249	XLOC_017916	XLOC_017916	Novel_lncRNA	102180541	GRK7	0.999139	1.11219e-06
TCONS_00028249	XLOC_017916	XLOC_017916	Novel_lncRNA	102171118	LOC102171118	0.999139	1.11219e-06
TCONS_00028249	XLOC_017916	XLOC_017916	Novel_lncRNA	102186860	TEX43	0.999139	1.11219e-06
TCONS_00028249	XLOC_017916	XLOC_017916	Novel_lncRNA	102175661	AWAT1	0.999139	1.11219e-06
TCONS_00028249	XLOC_017916	XLOC_017916	Novel_lncRNA	102175987	LOC102175987	0.999139	1.11219e-06
TCONS_00028249	XLOC_017916	XLOC_017916	Novel_lncRNA	108634508	LOC108634508	0.999139	1.11219e-06
TCONS_00028249	XLOC_017916	XLOC_017916	Novel_lncRNA	102185156	LOC102185156	0.999139	1.11219e-06
TCONS_00028249	XLOC_017916	XLOC_017916	Novel_lncRNA	102173727	ZNF845	0.999139	1.11219e-06
TCONS_00028249	XLOC_017916	XLOC_017916	Novel_lncRNA	102179523	PCP4	0.999139	1.11219e-06
TCONS_00028249	XLOC_017916	XLOC_017916	Novel_lncRNA	106503767	LOC106503767	0.999139	1.11219e-06
TCONS_00028249	XLOC_017916	XLOC_017916	Novel_lncRNA	102190992	LOC102190992	0.999139	1.11219e-06
TCONS_00028249	XLOC_017916	XLOC_017916	Novel_lncRNA	102180138	TMEM74B	0.999139	1.11219e-06
TCONS_00028249	XLOC_017916	XLOC_017916	Novel_lncRNA	102169608	LOC102169608	0.999139	1.11219e-06
TCONS_00028249	XLOC_017916	XLOC_017916	Novel_lncRNA	108637271	POU4F1	0.999139	1.11219e-06
TCONS_00028249	XLOC_017916	XLOC_017916	Novel_lncRNA	102184387	CPO	0.999139	1.11219e-06
TCONS_00028249	XLOC_017916	XLOC_017916	Novel_lncRNA	108636285	NKX3-2	0.999139	1.11219e-06
TCONS_00028249	XLOC_017916	XLOC_017916	Novel_lncRNA	108638246	LOC108638246	0.999139	1.11219e-06
TCONS_00028249	XLOC_017916	XLOC_017916	Novel_lncRNA	108636278	LOC108636278	0.999139	1.11219e-06
TCONS_00028249	XLOC_017916	XLOC_017916	Novel_lncRNA	108638450	LOC108638450	0.999139	1.11219e-06
TCONS_00028249	XLOC_017916	XLOC_017916	Novel_lncRNA	102168282	TTLL10	0.999139	1.11219e-06
TCONS_00028249	XLOC_017916	XLOC_017916	Novel_lncRNA	102170469	CCDC33	0.999139	1.11219e-06
TCONS_00028249	XLOC_017916	XLOC_017916	Novel_lncRNA	102170996	LOC102170996	0.999139	1.11219e-06
TCONS_00028249	XLOC_017916	XLOC_017916	Novel_lncRNA	108637591	LOC108637591	0.999139	1.11219e-06
TCONS_00026838	102186180	IFRD1	Novel_lncRNA	102168518	TACR3	0.999114	1.17843e-06
TCONS_00150002	102169739	KCNJ5	Novel_lncRNA	102175045	HBBC	0.999095	1.22923e-06
TCONS_00028249	XLOC_017916	XLOC_017916	Novel_lncRNA	102169753	LOC102169753	0.99909	1.24252e-06
XR_001917947.1	102184972	LOC102184972	Annotated_lncRNA	102185583	LOC102185583	0.999084	1.25856e-06
XR_001917947.1	102184972	LOC102184972	Annotated_lncRNA	102175233	TMEM132D	0.999084	1.25856e-06
XR_001917947.1	102184972	LOC102184972	Annotated_lncRNA	102172672	MPP4	0.999084	1.25856e-06
XR_001917947.1	102184972	LOC102184972	Annotated_lncRNA	102182143	SLC10A2	0.999084	1.25856e-06
XR_001917947.1	102184972	LOC102184972	Annotated_lncRNA	102173806	OCM2	0.999084	1.25856e-06
XR_001917947.1	102184972	LOC102184972	Annotated_lncRNA	102176787	SNCB	0.999084	1.25856e-06
XR_001917947.1	102184972	LOC102184972	Annotated_lncRNA	102191826	ACPT	0.999084	1.25856e-06
XR_001917947.1	102184972	LOC102184972	Annotated_lncRNA	102176559	OTOP2	0.999084	1.25856e-06
XR_001917947.1	102184972	LOC102184972	Annotated_lncRNA	102173108	RAG1	0.999084	1.25856e-06
XR_001917947.1	102184972	LOC102184972	Annotated_lncRNA	102177135	LOC102177135	0.999084	1.25856e-06
XR_001917947.1	102184972	LOC102184972	Annotated_lncRNA	108636256	LOC108636256	0.999084	1.25856e-06
XR_001917947.1	102184972	LOC102184972	Annotated_lncRNA	108633226	PKP3	0.999084	1.25856e-06
XR_001917947.1	102184972	LOC102184972	Annotated_lncRNA	102184642	LOC102184642	0.999084	1.25856e-06
XR_001917947.1	102184972	LOC102184972	Annotated_lncRNA	102190743	PTH2R	0.999084	1.25856e-06
XR_001917947.1	102184972	LOC102184972	Annotated_lncRNA	102178189	HTR3A	0.999084	1.25856e-06
XR_001917947.1	102184972	LOC102184972	Annotated_lncRNA	102189434	LOC102189434	0.999084	1.25856e-06
XR_001917947.1	102184972	LOC102184972	Annotated_lncRNA	102184925	IL24	0.999084	1.25856e-06
XR_001917947.1	102184972	LOC102184972	Annotated_lncRNA	102190182	GLYATL3	0.999084	1.25856e-06
XR_001917947.1	102184972	LOC102184972	Annotated_lncRNA	102172785	C4H7orf72	0.999084	1.25856e-06
XR_001917947.1	102184972	LOC102184972	Annotated_lncRNA	108636779	LOC108636779	0.999084	1.25856e-06
XR_001917947.1	102184972	LOC102184972	Annotated_lncRNA	102185009	C11H2orf78	0.999084	1.25856e-06
XR_001917947.1	102184972	LOC102184972	Annotated_lncRNA	102181979	ADAD2	0.999084	1.25856e-06
XR_001917947.1	102184972	LOC102184972	Annotated_lncRNA	102181973	ACCSL	0.999084	1.25856e-06
XR_001917947.1	102184972	LOC102184972	Annotated_lncRNA	102168592	LOC102168592	0.999084	1.25856e-06
XR_001917947.1	102184972	LOC102184972	Annotated_lncRNA	102170346	LOC102170346	0.999084	1.25856e-06
XR_001917947.1	102184972	LOC102184972	Annotated_lncRNA	102168218	TM4SF20	0.999084	1.25856e-06
XR_001917947.1	102184972	LOC102184972	Annotated_lncRNA	102178616	LOC102178616	0.999084	1.25856e-06
XR_001917947.1	102184972	LOC102184972	Annotated_lncRNA	108635518	LOC108635518	0.999084	1.25856e-06
XR_001917947.1	102184972	LOC102184972	Annotated_lncRNA	108635556	LOC108635556	0.999084	1.25856e-06
XR_001917947.1	102184972	LOC102184972	Annotated_lncRNA	108638399	LOC108638399	0.999084	1.25856e-06
XR_001917947.1	102184972	LOC102184972	Annotated_lncRNA	102187631	CNTNAP5	0.999084	1.25856e-06
XR_001917947.1	102184972	LOC102184972	Annotated_lncRNA	108634235	LOC108634235	0.999084	1.25856e-06
XR_001917947.1	102184972	LOC102184972	Annotated_lncRNA	102168916	ABO	0.999084	1.25856e-06
XR_001917947.1	102184972	LOC102184972	Annotated_lncRNA	102185483	LOC102185483	0.999084	1.25856e-06
XR_001917947.1	102184972	LOC102184972	Annotated_lncRNA	102183951	PGLYRP2	0.999084	1.25856e-06
XR_001917947.1	102184972	LOC102184972	Annotated_lncRNA	102178758	UPK1A	0.999084	1.25856e-06
XR_001917947.1	102184972	LOC102184972	Annotated_lncRNA	102169028	CDH22	0.999084	1.25856e-06
XR_001917947.1	102184972	LOC102184972	Annotated_lncRNA	102175547	LOC102175547	0.999084	1.25856e-06
XR_001917947.1	102184972	LOC102184972	Annotated_lncRNA	102173362	LOC102173362	0.999084	1.25856e-06
XR_001917947.1	102184972	LOC102184972	Annotated_lncRNA	102181698	C15H11orf63	0.999084	1.25856e-06
XR_001917947.1	102184972	LOC102184972	Annotated_lncRNA	102178019	LCA5L	0.999084	1.25856e-06
XR_001917947.1	102184972	LOC102184972	Annotated_lncRNA	102173401	CNBD1	0.999084	1.25856e-06
XR_001917947.1	102184972	LOC102184972	Annotated_lncRNA	108636136	PDE6H	0.999084	1.25856e-06
XR_001917947.1	102184972	LOC102184972	Annotated_lncRNA	102184779	PNLIPRP3	0.999084	1.25856e-06
XR_001917947.1	102184972	LOC102184972	Annotated_lncRNA	102180419	TAT	0.999084	1.25856e-06
XR_001917947.1	102184972	LOC102184972	Annotated_lncRNA	102171049	ODAM	0.999084	1.25856e-06
XR_001917947.1	102184972	LOC102184972	Annotated_lncRNA	102190017	VAX1	0.999084	1.25856e-06
XR_001917947.1	102184972	LOC102184972	Annotated_lncRNA	108638130	LOC108638130	0.999084	1.25856e-06
XR_001917947.1	102184972	LOC102184972	Annotated_lncRNA	106502757	AVP	0.999084	1.25856e-06
XR_001917947.1	102184972	LOC102184972	Annotated_lncRNA	102185671	LOC102185671	0.999084	1.25856e-06
XR_001917947.1	102184972	LOC102184972	Annotated_lncRNA	102190271	UMODL1	0.999084	1.25856e-06
XR_001917947.1	102184972	LOC102184972	Annotated_lncRNA	102190477	LOC102190477	0.999084	1.25856e-06
XR_001917947.1	102184972	LOC102184972	Annotated_lncRNA	102178903	LOC102178903	0.999084	1.25856e-06
XR_001917947.1	102184972	LOC102184972	Annotated_lncRNA	102170800	LOC102170800	0.999084	1.25856e-06
XR_001917947.1	102184972	LOC102184972	Annotated_lncRNA	102186370	GOT1L1	0.999084	1.25856e-06
XR_001917947.1	102184972	LOC102184972	Annotated_lncRNA	102180236	LOC102180236	0.999084	1.25856e-06
XR_001917947.1	102184972	LOC102184972	Annotated_lncRNA	102176397	INHBC	0.999084	1.25856e-06
XR_001917947.1	102184972	LOC102184972	Annotated_lncRNA	102180695	LOC102180695	0.999084	1.25856e-06
XR_001917947.1	102184972	LOC102184972	Annotated_lncRNA	102181743	LOC102181743	0.999084	1.25856e-06
XR_001917947.1	102184972	LOC102184972	Annotated_lncRNA	102190050	SNX31	0.999084	1.25856e-06
XR_001917947.1	102184972	LOC102184972	Annotated_lncRNA	102190725	C18H19orf81	0.999084	1.25856e-06
XR_001917947.1	102184972	LOC102184972	Annotated_lncRNA	106502413	FOXE1	0.999084	1.25856e-06
XR_001917947.1	102184972	LOC102184972	Annotated_lncRNA	102174666	LOC102174666	0.999084	1.25856e-06
XR_001917947.1	102184972	LOC102184972	Annotated_lncRNA	102176870	LOC102176870	0.999084	1.25856e-06
XR_001917947.1	102184972	LOC102184972	Annotated_lncRNA	102189543	EPHA10	0.999084	1.25856e-06
XR_001917947.1	102184972	LOC102184972	Annotated_lncRNA	108634834	SPACA7	0.999084	1.25856e-06
XR_001917947.1	102184972	LOC102184972	Annotated_lncRNA	108634425	LOC108634425	0.999084	1.25856e-06
XR_001917947.1	102184972	LOC102184972	Annotated_lncRNA	102186467	LOC102186467	0.999084	1.25856e-06
XR_001917947.1	102184972	LOC102184972	Annotated_lncRNA	102179483	ADAM21	0.999084	1.25856e-06
XR_001917947.1	102184972	LOC102184972	Annotated_lncRNA	102190857	LOC102190857	0.999084	1.25856e-06
XR_001917947.1	102184972	LOC102184972	Annotated_lncRNA	102183480	LOC102183480	0.999084	1.25856e-06
XR_001917947.1	102184972	LOC102184972	Annotated_lncRNA	102185743	GLRA3	0.999084	1.25856e-06
XR_001917947.1	102184972	LOC102184972	Annotated_lncRNA	102190544	LOC102190544	0.999084	1.25856e-06
XR_001917947.1	102184972	LOC102184972	Annotated_lncRNA	102191620	GJD2	0.999084	1.25856e-06
XR_001917947.1	102184972	LOC102184972	Annotated_lncRNA	102171403	FGF20	0.999084	1.25856e-06
XR_001917947.1	102184972	LOC102184972	Annotated_lncRNA	102173055	LOC102173055	0.999084	1.25856e-06
XR_001917947.1	102184972	LOC102184972	Annotated_lncRNA	102176719	PIWIL1	0.999084	1.25856e-06
XR_001917947.1	102184972	LOC102184972	Annotated_lncRNA	102190769	LOC102190769	0.999084	1.25856e-06
XR_001917947.1	102184972	LOC102184972	Annotated_lncRNA	106503845	RS1	0.999084	1.25856e-06
XR_001917947.1	102184972	LOC102184972	Annotated_lncRNA	102189550	NOBOX	0.999084	1.25856e-06
XR_001917947.1	102184972	LOC102184972	Annotated_lncRNA	102175327	KRT35	0.999084	1.25856e-06
XR_001917947.1	102184972	LOC102184972	Annotated_lncRNA	108636120	CECR6	0.999084	1.25856e-06
XR_001917947.1	102184972	LOC102184972	Annotated_lncRNA	102178138	SOSTDC1	0.999084	1.25856e-06
XR_001917947.1	102184972	LOC102184972	Annotated_lncRNA	102179730	AGR2	0.999084	1.25856e-06
XR_001917947.1	102184972	LOC102184972	Annotated_lncRNA	102170658	ELAVL4	0.999084	1.25856e-06
XR_001917947.1	102184972	LOC102184972	Annotated_lncRNA	102190363	FAM19A4	0.999084	1.25856e-06
XR_001917947.1	102184972	LOC102184972	Annotated_lncRNA	108634972	LOC108634972	0.999084	1.25856e-06
XR_001917947.1	102184972	LOC102184972	Annotated_lncRNA	106502424	SPATA31C2	0.999084	1.25856e-06
XR_001917947.1	102184972	LOC102184972	Annotated_lncRNA	106502423	LOC106502423	0.999084	1.25856e-06
XR_001917947.1	102184972	LOC102184972	Annotated_lncRNA	102169619	LOC102169619	0.999084	1.25856e-06
XR_001917947.1	102184972	LOC102184972	Annotated_lncRNA	102187564	CCDC83	0.999084	1.25856e-06
XR_001917947.1	102184972	LOC102184972	Annotated_lncRNA	102182220	THEG	0.999084	1.25856e-06
XR_001917947.1	102184972	LOC102184972	Annotated_lncRNA	102181121	C8H9orf135	0.999084	1.25856e-06
XR_001917947.1	102184972	LOC102184972	Annotated_lncRNA	102171271	LOC102171271	0.999084	1.25856e-06
XR_001917947.1	102184972	LOC102184972	Annotated_lncRNA	102171684	LOC102171684	0.999084	1.25856e-06
XR_001917947.1	102184972	LOC102184972	Annotated_lncRNA	102172427	LOC102172427	0.999084	1.25856e-06
XR_001917947.1	102184972	LOC102184972	Annotated_lncRNA	102177144	AWAT2	0.999084	1.25856e-06
XR_001917947.1	102184972	LOC102184972	Annotated_lncRNA	108636284	NKX6-1	0.999084	1.25856e-06
XR_001917947.1	102184972	LOC102184972	Annotated_lncRNA	102185934	FAM150A	0.999084	1.25856e-06
XR_001917947.1	102184972	LOC102184972	Annotated_lncRNA	108637883	LOC108637883	0.999084	1.25856e-06
XR_001917947.1	102184972	LOC102184972	Annotated_lncRNA	102174310	SULT1C2	0.999084	1.25856e-06
XR_001917947.1	102184972	LOC102184972	Annotated_lncRNA	102171153	ULBP3	0.999084	1.25856e-06
XR_001917947.1	102184972	LOC102184972	Annotated_lncRNA	106502603	C11H2orf91	0.999084	1.25856e-06
XR_001917947.1	102184972	LOC102184972	Annotated_lncRNA	102169380	LOC102169380	0.999084	1.25856e-06
XR_001917947.1	102184972	LOC102184972	Annotated_lncRNA	102184756	HSPB9	0.999084	1.25856e-06
XR_001917947.1	102184972	LOC102184972	Annotated_lncRNA	102177197	TMC3	0.999084	1.25856e-06
XR_001917947.1	102184972	LOC102184972	Annotated_lncRNA	102178576	ZNF501	0.999084	1.25856e-06
XR_001917947.1	102184972	LOC102184972	Annotated_lncRNA	106503578	LOC106503578	0.999084	1.25856e-06
XR_001917947.1	102184972	LOC102184972	Annotated_lncRNA	102187724	TNP1	0.999084	1.25856e-06
XR_001917947.1	102184972	LOC102184972	Annotated_lncRNA	102176915	LOC102176915	0.999084	1.25856e-06
XR_001917947.1	102184972	LOC102184972	Annotated_lncRNA	108634826	LOC108634826	0.999084	1.25856e-06
XR_001917947.1	102184972	LOC102184972	Annotated_lncRNA	102170123	LOC102170123	0.999084	1.25856e-06
XR_001917947.1	102184972	LOC102184972	Annotated_lncRNA	106503294	LOC106503294	0.999084	1.25856e-06
XR_001917947.1	102184972	LOC102184972	Annotated_lncRNA	106502695	URAD	0.999084	1.25856e-06
XR_001917947.1	102184972	LOC102184972	Annotated_lncRNA	102185619	CHST9	0.999084	1.25856e-06
XR_001917947.1	102184972	LOC102184972	Annotated_lncRNA	108638080	LOC108638080	0.999084	1.25856e-06
XR_001917947.1	102184972	LOC102184972	Annotated_lncRNA	108638089	LOC108638089	0.999084	1.25856e-06
XR_001917947.1	102184972	LOC102184972	Annotated_lncRNA	102190498	LOC102190498	0.999084	1.25856e-06
XR_001917947.1	102184972	LOC102184972	Annotated_lncRNA	102184477	CPB1	0.999084	1.25856e-06
XR_001917947.1	102184972	LOC102184972	Annotated_lncRNA	108633274	LOC108633274	0.999084	1.25856e-06
XR_001917947.1	102184972	LOC102184972	Annotated_lncRNA	102169006	FOXB2	0.999084	1.25856e-06
XR_001917947.1	102184972	LOC102184972	Annotated_lncRNA	102170785	SAXO1	0.999084	1.25856e-06
XR_001917947.1	102184972	LOC102184972	Annotated_lncRNA	100861239	MC4R	0.999084	1.25856e-06
XR_001917947.1	102184972	LOC102184972	Annotated_lncRNA	102169509	LOC102169509	0.999084	1.25856e-06
XR_001917947.1	102184972	LOC102184972	Annotated_lncRNA	102180022	MAGEA10	0.999084	1.25856e-06
XR_001917947.1	102184972	LOC102184972	Annotated_lncRNA	102176958	LOC102176958	0.999084	1.25856e-06
XR_001917947.1	102184972	LOC102184972	Annotated_lncRNA	102172868	ZP4	0.999084	1.25856e-06
XR_001917947.1	102184972	LOC102184972	Annotated_lncRNA	102185836	LOC102185836	0.999084	1.25856e-06
XR_001917947.1	102184972	LOC102184972	Annotated_lncRNA	102190859	CT83	0.999084	1.25856e-06
XR_001917947.1	102184972	LOC102184972	Annotated_lncRNA	102177608	AFM	0.999084	1.25856e-06
XR_001917947.1	102184972	LOC102184972	Annotated_lncRNA	102175550	TCERG1L	0.999084	1.25856e-06
XR_001917947.1	102184972	LOC102184972	Annotated_lncRNA	102190637	IGF2BP1	0.999084	1.25856e-06
XR_001917947.1	102184972	LOC102184972	Annotated_lncRNA	102181225	DSCAML1	0.999084	1.25856e-06
XR_001917947.1	102184972	LOC102184972	Annotated_lncRNA	102175780	CCDC153	0.999084	1.25856e-06
XR_001917947.1	102184972	LOC102184972	Annotated_lncRNA	102175823	HS3ST4	0.999084	1.25856e-06
XR_001917947.1	102184972	LOC102184972	Annotated_lncRNA	102185900	LOC102185900	0.999084	1.25856e-06
TCONS_00134767	XLOC_084658	XLOC_084658	Novel_lncRNA	XLOC_060003	XLOC_060003	0.998979	1.56289e-06
TCONS_00085732	102184828	SLC30A8	Novel_lncRNA	102181613	COLEC10	0.998961	1.61782e-06
TCONS_00005111	XLOC_003282	XLOC_003282	Novel_lncRNA	102181613	COLEC10	0.998961	1.61782e-06
TCONS_00005969	XLOC_003916	XLOC_003916	Novel_lncRNA	102181613	COLEC10	0.998961	1.61782e-06
TCONS_00026307	XLOC_016605	XLOC_016605	Novel_lncRNA	102181613	COLEC10	0.998961	1.61782e-06
TCONS_00075496	XLOC_048169	XLOC_048169	Novel_lncRNA	102181613	COLEC10	0.998961	1.61782e-06
TCONS_00099045	XLOC_063218	XLOC_063218	Novel_lncRNA	102181613	COLEC10	0.998961	1.61782e-06
TCONS_00099072	XLOC_063244	XLOC_063244	Novel_lncRNA	102181613	COLEC10	0.998961	1.61782e-06
TCONS_00132942	XLOC_083468	XLOC_083468	Novel_lncRNA	102181613	COLEC10	0.998961	1.61782e-06
TCONS_00133549	XLOC_083880	XLOC_083880	Novel_lncRNA	102181613	COLEC10	0.998961	1.61782e-06
TCONS_00135003	XLOC_084795	XLOC_084795	Novel_lncRNA	102181613	COLEC10	0.998961	1.61782e-06
TCONS_00154695	XLOC_097072	XLOC_097072	Novel_lncRNA	102181613	COLEC10	0.998961	1.61782e-06
TCONS_00150002	102169739	KCNJ5	Novel_lncRNA	102177960	RBP3	0.998858	1.95643e-06
TCONS_00150002	102169739	KCNJ5	Novel_lncRNA	102170914	NLGN1	0.998844	2.00506e-06
TCONS_00150002	102169739	KCNJ5	Novel_lncRNA	102174183	IGF2BP3	0.998746	2.35909e-06
TCONS_00083603	XLOC_053332	XLOC_053332	Novel_lncRNA	102181613	COLEC10	0.998694	2.55643e-06
XR_001917947.1	102184972	LOC102184972	Annotated_lncRNA	108637994	SRRM5	0.998654	2.71507e-06
TCONS_00126170	102186348	CSRNP1	Novel_lncRNA	102189688	CMPK2	0.998637	2.78397e-06
TCONS_00041415	XLOC_026378	XLOC_026378	Novel_lncRNA	108633842	LOC108633842	0.998566	3.08341e-06
XR_001917947.1	102184972	LOC102184972	Annotated_lncRNA	102179049	IGSF5	0.998563	3.09572e-06
TCONS_00073557	102170796	MYO16	Novel_lncRNA	102176268	OTOP3	0.998552	3.14261e-06
TCONS_00041415	XLOC_026378	XLOC_026378	Novel_lncRNA	102176715	PDPN	0.998504	3.35492e-06
TCONS_00026838	102186180	IFRD1	Novel_lncRNA	108637994	SRRM5	0.998474	3.49219e-06
TCONS_00134767	XLOC_084658	XLOC_084658	Novel_lncRNA	102177650	CES4A	0.998442	3.63902e-06
TCONS_00085732	102184828	SLC30A8	Novel_lncRNA	102191086	COCH	0.998395	3.86313e-06
TCONS_00005111	XLOC_003282	XLOC_003282	Novel_lncRNA	102191086	COCH	0.998395	3.86313e-06
TCONS_00005969	XLOC_003916	XLOC_003916	Novel_lncRNA	102191086	COCH	0.998395	3.86313e-06
TCONS_00026307	XLOC_016605	XLOC_016605	Novel_lncRNA	102191086	COCH	0.998395	3.86313e-06
TCONS_00075496	XLOC_048169	XLOC_048169	Novel_lncRNA	102191086	COCH	0.998395	3.86313e-06
TCONS_00099045	XLOC_063218	XLOC_063218	Novel_lncRNA	102191086	COCH	0.998395	3.86313e-06
TCONS_00099072	XLOC_063244	XLOC_063244	Novel_lncRNA	102191086	COCH	0.998395	3.86313e-06
TCONS_00132942	XLOC_083468	XLOC_083468	Novel_lncRNA	102191086	COCH	0.998395	3.86313e-06
TCONS_00133549	XLOC_083880	XLOC_083880	Novel_lncRNA	102191086	COCH	0.998395	3.86313e-06
TCONS_00135003	XLOC_084795	XLOC_084795	Novel_lncRNA	102191086	COCH	0.998395	3.86313e-06
TCONS_00154695	XLOC_097072	XLOC_097072	Novel_lncRNA	102191086	COCH	0.998395	3.86313e-06
TCONS_00026838	102186180	IFRD1	Novel_lncRNA	102176721	LOC102176721	0.998342	4.12091e-06
TCONS_00151400	XLOC_094632	XLOC_094632	Novel_lncRNA	102176715	PDPN	0.99831	4.2804e-06
TCONS_00028249	XLOC_017916	XLOC_017916	Novel_lncRNA	102176665	PCNX2	0.99829	4.38443e-06
TCONS_00150002	102169739	KCNJ5	Novel_lncRNA	102174250	ABCB11	0.99828	4.43595e-06
TCONS_00041415	XLOC_026378	XLOC_026378	Novel_lncRNA	102181955	TPD52L1	0.998257	4.55449e-06
TCONS_00008012	XLOC_005237	XLOC_005237	Novel_lncRNA	102181613	COLEC10	0.998229	4.69955e-06
TCONS_00150002	102169739	KCNJ5	Novel_lncRNA	102180513	MATN2	0.998208	4.81196e-06
TCONS_00026838	102186180	IFRD1	Novel_lncRNA	102179932	CPZ	0.998193	4.89536e-06
TCONS_00121767	102189162	ABHD2	Novel_lncRNA	102170588	LOC102170588	0.998189	4.91645e-06
TCONS_00083603	XLOC_053332	XLOC_053332	Novel_lncRNA	102186820	LPAR3	0.998149	5.13561e-06
XR_001917947.1	102184972	LOC102184972	Annotated_lncRNA	102168518	TACR3	0.998142	5.1754e-06
TCONS_00124841	108638635	MUSTN1	Novel_lncRNA	102172025	USP24	0.998141	5.18006e-06
TCONS_00121767	102189162	ABHD2	Novel_lncRNA	102177234	SPINK9	0.998136	5.20852e-06
TCONS_00083603	XLOC_053332	XLOC_053332	Novel_lncRNA	102179212	PHYH	0.997993	6.04009e-06
TCONS_00151400	XLOC_094632	XLOC_094632	Novel_lncRNA	102170339	MMP12	0.99794	6.36098e-06
TCONS_00008012	XLOC_005237	XLOC_005237	Novel_lncRNA	102191086	COCH	0.997908	6.56046e-06
TCONS_00124841	108638635	MUSTN1	Novel_lncRNA	102186972	NTSR2	0.997905	6.57702e-06
TCONS_00083603	XLOC_053332	XLOC_053332	Novel_lncRNA	102173832	RLN3	0.997886	6.69651e-06
TCONS_00083603	XLOC_053332	XLOC_053332	Novel_lncRNA	102186657	LOC102186657	0.997886	6.69651e-06
TCONS_00083603	XLOC_053332	XLOC_053332	Novel_lncRNA	102188467	TRIM67	0.997886	6.69651e-06
TCONS_00083603	XLOC_053332	XLOC_053332	Novel_lncRNA	102181195	DMC1	0.997886	6.69651e-06
TCONS_00083603	XLOC_053332	XLOC_053332	Novel_lncRNA	102168535	LOC102168535	0.997886	6.69651e-06
TCONS_00083603	XLOC_053332	XLOC_053332	Novel_lncRNA	102175964	LOC102175964	0.997886	6.69651e-06
TCONS_00083603	XLOC_053332	XLOC_053332	Novel_lncRNA	102179409	KLK11	0.997886	6.69651e-06
TCONS_00083603	XLOC_053332	XLOC_053332	Novel_lncRNA	102183170	NPHS2	0.997886	6.69651e-06
TCONS_00083603	XLOC_053332	XLOC_053332	Novel_lncRNA	102177885	TLE6	0.997886	6.69651e-06
TCONS_00083603	XLOC_053332	XLOC_053332	Novel_lncRNA	102178571	GMNC	0.997886	6.69651e-06
TCONS_00083603	XLOC_053332	XLOC_053332	Novel_lncRNA	102177362	CES3	0.997886	6.69651e-06
TCONS_00083603	XLOC_053332	XLOC_053332	Novel_lncRNA	102170014	TNFRSF17	0.997886	6.69651e-06
TCONS_00083603	XLOC_053332	XLOC_053332	Novel_lncRNA	102187721	LYPD6B	0.997886	6.69651e-06
TCONS_00083603	XLOC_053332	XLOC_053332	Novel_lncRNA	102179936	LOC102179936	0.997886	6.69651e-06
TCONS_00083603	XLOC_053332	XLOC_053332	Novel_lncRNA	102186095	LMNTD2	0.997886	6.69651e-06
TCONS_00083603	XLOC_053332	XLOC_053332	Novel_lncRNA	102176804	ANKRD60	0.997886	6.69651e-06
TCONS_00083603	XLOC_053332	XLOC_053332	Novel_lncRNA	108633288	LOC108633288	0.997886	6.69651e-06
TCONS_00083603	XLOC_053332	XLOC_053332	Novel_lncRNA	102169312	OC90	0.997886	6.69651e-06
TCONS_00083603	XLOC_053332	XLOC_053332	Novel_lncRNA	108637736	OPN3	0.997886	6.69651e-06
TCONS_00083603	XLOC_053332	XLOC_053332	Novel_lncRNA	106503958	LOC106503958	0.997886	6.69651e-06
TCONS_00083603	XLOC_053332	XLOC_053332	Novel_lncRNA	102175925	LOC102175925	0.997886	6.69651e-06
TCONS_00083603	XLOC_053332	XLOC_053332	Novel_lncRNA	108638237	LOC108638237	0.997886	6.69651e-06
TCONS_00083603	XLOC_053332	XLOC_053332	Novel_lncRNA	108634850	LOC108634850	0.997886	6.69651e-06
TCONS_00083603	XLOC_053332	XLOC_053332	Novel_lncRNA	108638408	IRX4	0.997886	6.69651e-06
TCONS_00083603	XLOC_053332	XLOC_053332	Novel_lncRNA	102186556	LRGUK	0.997886	6.69651e-06
TCONS_00083603	XLOC_053332	XLOC_053332	Novel_lncRNA	102183203	LOC102183203	0.997886	6.69651e-06
TCONS_00083603	XLOC_053332	XLOC_053332	Novel_lncRNA	102172975	PIK3C2G	0.997886	6.69651e-06
TCONS_00083603	XLOC_053332	XLOC_053332	Novel_lncRNA	102174637	F9	0.997886	6.69651e-06
TCONS_00083603	XLOC_053332	XLOC_053332	Novel_lncRNA	102178541	SLCO6A1	0.997886	6.69651e-06
TCONS_00083603	XLOC_053332	XLOC_053332	Novel_lncRNA	102183996	AGRP	0.997886	6.69651e-06
TCONS_00083603	XLOC_053332	XLOC_053332	Novel_lncRNA	102171720	GJB2	0.997886	6.69651e-06
TCONS_00083603	XLOC_053332	XLOC_053332	Novel_lncRNA	102170234	LOC102170234	0.997886	6.69651e-06
TCONS_00083603	XLOC_053332	XLOC_053332	Novel_lncRNA	102183581	LOC102183581	0.997886	6.69651e-06
TCONS_00083603	XLOC_053332	XLOC_053332	Novel_lncRNA	102175286	LOC102175286	0.997886	6.69651e-06
TCONS_00083603	XLOC_053332	XLOC_053332	Novel_lncRNA	102174635	SLC22A18	0.997886	6.69651e-06
TCONS_00083603	XLOC_053332	XLOC_053332	Novel_lncRNA	102177037	TEX33	0.997886	6.69651e-06
TCONS_00083603	XLOC_053332	XLOC_053332	Novel_lncRNA	106502327	LOC106502327	0.997886	6.69651e-06
TCONS_00083603	XLOC_053332	XLOC_053332	Novel_lncRNA	108634074	LOC108634074	0.997886	6.69651e-06
TCONS_00083603	XLOC_053332	XLOC_053332	Novel_lncRNA	102179133	PPY	0.997886	6.69651e-06
TCONS_00083603	XLOC_053332	XLOC_053332	Novel_lncRNA	102180541	GRK7	0.997886	6.69651e-06
TCONS_00083603	XLOC_053332	XLOC_053332	Novel_lncRNA	102190774	LOC102190774	0.997886	6.69651e-06
TCONS_00083603	XLOC_053332	XLOC_053332	Novel_lncRNA	102171118	LOC102171118	0.997886	6.69651e-06
TCONS_00083603	XLOC_053332	XLOC_053332	Novel_lncRNA	102170557	DNMT3L	0.997886	6.69651e-06
TCONS_00083603	XLOC_053332	XLOC_053332	Novel_lncRNA	108638212	LOC108638212	0.997886	6.69651e-06
TCONS_00083603	XLOC_053332	XLOC_053332	Novel_lncRNA	102186860	TEX43	0.997886	6.69651e-06
TCONS_00083603	XLOC_053332	XLOC_053332	Novel_lncRNA	102175661	AWAT1	0.997886	6.69651e-06
TCONS_00083603	XLOC_053332	XLOC_053332	Novel_lncRNA	102175987	LOC102175987	0.997886	6.69651e-06
TCONS_00083603	XLOC_053332	XLOC_053332	Novel_lncRNA	102186205	LOC102186205	0.997886	6.69651e-06
TCONS_00083603	XLOC_053332	XLOC_053332	Novel_lncRNA	102185156	LOC102185156	0.997886	6.69651e-06
TCONS_00083603	XLOC_053332	XLOC_053332	Novel_lncRNA	102190989	B4GALNT2	0.997886	6.69651e-06
TCONS_00083603	XLOC_053332	XLOC_053332	Novel_lncRNA	102173727	ZNF845	0.997886	6.69651e-06
TCONS_00083603	XLOC_053332	XLOC_053332	Novel_lncRNA	102171649	RNF222	0.997886	6.69651e-06
TCONS_00083603	XLOC_053332	XLOC_053332	Novel_lncRNA	102179523	PCP4	0.997886	6.69651e-06
TCONS_00083603	XLOC_053332	XLOC_053332	Novel_lncRNA	102177323	MKRN3	0.997886	6.69651e-06
TCONS_00083603	XLOC_053332	XLOC_053332	Novel_lncRNA	102189435	SOX14	0.997886	6.69651e-06
TCONS_00083603	XLOC_053332	XLOC_053332	Novel_lncRNA	102189647	LIPK	0.997886	6.69651e-06
TCONS_00083603	XLOC_053332	XLOC_053332	Novel_lncRNA	108636550	LOC108636550	0.997886	6.69651e-06
TCONS_00083603	XLOC_053332	XLOC_053332	Novel_lncRNA	106503767	LOC106503767	0.997886	6.69651e-06
TCONS_00083603	XLOC_053332	XLOC_053332	Novel_lncRNA	102190992	LOC102190992	0.997886	6.69651e-06
TCONS_00083603	XLOC_053332	XLOC_053332	Novel_lncRNA	102180138	TMEM74B	0.997886	6.69651e-06
TCONS_00083603	XLOC_053332	XLOC_053332	Novel_lncRNA	108637775	LOC108637775	0.997886	6.69651e-06
TCONS_00083603	XLOC_053332	XLOC_053332	Novel_lncRNA	102169608	LOC102169608	0.997886	6.69651e-06
TCONS_00083603	XLOC_053332	XLOC_053332	Novel_lncRNA	102172230	LOC102172230	0.997886	6.69651e-06
TCONS_00083603	XLOC_053332	XLOC_053332	Novel_lncRNA	102171837	LOC102171837	0.997886	6.69651e-06
TCONS_00083603	XLOC_053332	XLOC_053332	Novel_lncRNA	102187403	PRSS55	0.997886	6.69651e-06
TCONS_00083603	XLOC_053332	XLOC_053332	Novel_lncRNA	102179983	MROH2B	0.997886	6.69651e-06
TCONS_00083603	XLOC_053332	XLOC_053332	Novel_lncRNA	108637271	POU4F1	0.997886	6.69651e-06
TCONS_00083603	XLOC_053332	XLOC_053332	Novel_lncRNA	102178106	KRT14	0.997886	6.69651e-06
TCONS_00083603	XLOC_053332	XLOC_053332	Novel_lncRNA	102180349	NKX2-5	0.997886	6.69651e-06
TCONS_00083603	XLOC_053332	XLOC_053332	Novel_lncRNA	102175416	NRSN2	0.997886	6.69651e-06
TCONS_00083603	XLOC_053332	XLOC_053332	Novel_lncRNA	102175572	LOC102175572	0.997886	6.69651e-06
TCONS_00083603	XLOC_053332	XLOC_053332	Novel_lncRNA	102184387	CPO	0.997886	6.69651e-06
TCONS_00083603	XLOC_053332	XLOC_053332	Novel_lncRNA	102181974	NPPA	0.997886	6.69651e-06
TCONS_00083603	XLOC_053332	XLOC_053332	Novel_lncRNA	108635390	LOC108635390	0.997886	6.69651e-06
TCONS_00083603	XLOC_053332	XLOC_053332	Novel_lncRNA	102181836	PLEKHS1	0.997886	6.69651e-06
TCONS_00083603	XLOC_053332	XLOC_053332	Novel_lncRNA	108636285	NKX3-2	0.997886	6.69651e-06
TCONS_00083603	XLOC_053332	XLOC_053332	Novel_lncRNA	108635475	LOC108635475	0.997886	6.69651e-06
TCONS_00083603	XLOC_053332	XLOC_053332	Novel_lncRNA	102188254	LOC102188254	0.997886	6.69651e-06
TCONS_00083603	XLOC_053332	XLOC_053332	Novel_lncRNA	108638246	LOC108638246	0.997886	6.69651e-06
TCONS_00083603	XLOC_053332	XLOC_053332	Novel_lncRNA	102184828	SLC30A8	0.997886	6.69651e-06
TCONS_00083603	XLOC_053332	XLOC_053332	Novel_lncRNA	100860913	IGFBP1	0.997886	6.69651e-06
TCONS_00083603	XLOC_053332	XLOC_053332	Novel_lncRNA	102180955	CCDC185	0.997886	6.69651e-06
TCONS_00083603	XLOC_053332	XLOC_053332	Novel_lncRNA	102173783	LOC102173783	0.997886	6.69651e-06
TCONS_00083603	XLOC_053332	XLOC_053332	Novel_lncRNA	108636278	LOC108636278	0.997886	6.69651e-06
TCONS_00083603	XLOC_053332	XLOC_053332	Novel_lncRNA	108638450	LOC108638450	0.997886	6.69651e-06
TCONS_00083603	XLOC_053332	XLOC_053332	Novel_lncRNA	102191070	CABP7	0.997886	6.69651e-06
TCONS_00083603	XLOC_053332	XLOC_053332	Novel_lncRNA	102168282	TTLL10	0.997886	6.69651e-06
TCONS_00083603	XLOC_053332	XLOC_053332	Novel_lncRNA	102186722	ZBBX	0.997886	6.69651e-06
TCONS_00083603	XLOC_053332	XLOC_053332	Novel_lncRNA	102187559	LOC102187559	0.997886	6.69651e-06
TCONS_00083603	XLOC_053332	XLOC_053332	Novel_lncRNA	102180500	CPNE6	0.997886	6.69651e-06
TCONS_00083603	XLOC_053332	XLOC_053332	Novel_lncRNA	102179077	TEX13B	0.997886	6.69651e-06
TCONS_00083603	XLOC_053332	XLOC_053332	Novel_lncRNA	108633268	LOC108633268	0.997886	6.69651e-06
TCONS_00083603	XLOC_053332	XLOC_053332	Novel_lncRNA	102176079	C1H21orf58	0.997886	6.69651e-06
TCONS_00083603	XLOC_053332	XLOC_053332	Novel_lncRNA	102170469	CCDC33	0.997886	6.69651e-06
TCONS_00083603	XLOC_053332	XLOC_053332	Novel_lncRNA	102181476	C29H11orf86	0.997886	6.69651e-06
TCONS_00083603	XLOC_053332	XLOC_053332	Novel_lncRNA	102180110	LOC102180110	0.997886	6.69651e-06
TCONS_00083603	XLOC_053332	XLOC_053332	Novel_lncRNA	102170996	LOC102170996	0.997886	6.69651e-06
TCONS_00083603	XLOC_053332	XLOC_053332	Novel_lncRNA	108637591	LOC108637591	0.997886	6.69651e-06
TCONS_00083603	XLOC_053332	XLOC_053332	Novel_lncRNA	102168316	ZG16	0.997886	6.69651e-06
TCONS_00083603	XLOC_053332	XLOC_053332	Novel_lncRNA	108634508	LOC108634508	0.997886	6.69651e-06
TCONS_00083603	XLOC_053332	XLOC_053332	Novel_lncRNA	102191160	LOC102191160	0.997886	6.69651e-06
TCONS_00083603	XLOC_053332	XLOC_053332	Novel_lncRNA	102185710	MYL7	0.997886	6.69651e-06
XR_001917947.1	102184972	LOC102184972	Annotated_lncRNA	102171252	SLC25A25	0.99785	6.92926e-06
TCONS_00151400	XLOC_094632	XLOC_094632	Novel_lncRNA	108633842	LOC108633842	0.997845	6.96151e-06
TCONS_00008012	XLOC_005237	XLOC_005237	Novel_lncRNA	102186820	LPAR3	0.997808	7.20146e-06
TCONS_00083603	XLOC_053332	XLOC_053332	Novel_lncRNA	102185866	LOC102185866	0.997802	7.24073e-06
TCONS_00151400	XLOC_094632	XLOC_094632	Novel_lncRNA	102181955	TPD52L1	0.99774	7.65881e-06
TCONS_00055857	102187770	PM20D2	Novel_lncRNA	102179035	CYLD	0.997732	7.71197e-06
TCONS_00124841	108638635	MUSTN1	Novel_lncRNA	102172210	EIF5	0.997715	7.82514e-06
TCONS_00083603	XLOC_053332	XLOC_053332	Novel_lncRNA	102191086	COCH	0.997669	8.14658e-06
TCONS_00121767	102189162	ABHD2	Novel_lncRNA	102178654	C18H16orf70	0.997664	8.18195e-06
TCONS_00151400	XLOC_094632	XLOC_094632	Novel_lncRNA	102183547	PSMD2	0.99764	8.34609e-06
TCONS_00124841	108638635	MUSTN1	Novel_lncRNA	102171398	ANKRD1	0.997616	8.52085e-06
TCONS_00085732	102184828	SLC30A8	Novel_lncRNA	102186820	LPAR3	0.997557	8.94494e-06
TCONS_00005111	XLOC_003282	XLOC_003282	Novel_lncRNA	102186820	LPAR3	0.997557	8.94494e-06
TCONS_00005969	XLOC_003916	XLOC_003916	Novel_lncRNA	102186820	LPAR3	0.997557	8.94494e-06
TCONS_00026307	XLOC_016605	XLOC_016605	Novel_lncRNA	102186820	LPAR3	0.997557	8.94494e-06
TCONS_00075496	XLOC_048169	XLOC_048169	Novel_lncRNA	102186820	LPAR3	0.997557	8.94494e-06
TCONS_00099045	XLOC_063218	XLOC_063218	Novel_lncRNA	102186820	LPAR3	0.997557	8.94494e-06
TCONS_00099072	XLOC_063244	XLOC_063244	Novel_lncRNA	102186820	LPAR3	0.997557	8.94494e-06
TCONS_00132942	XLOC_083468	XLOC_083468	Novel_lncRNA	102186820	LPAR3	0.997557	8.94494e-06
TCONS_00133549	XLOC_083880	XLOC_083880	Novel_lncRNA	102186820	LPAR3	0.997557	8.94494e-06
TCONS_00135003	XLOC_084795	XLOC_084795	Novel_lncRNA	102186820	LPAR3	0.997557	8.94494e-06
TCONS_00154695	XLOC_097072	XLOC_097072	Novel_lncRNA	102186820	LPAR3	0.997557	8.94494e-06
XR_001917947.1	102184972	LOC102184972	Annotated_lncRNA	102185389	ANGPTL7	0.997535	9.1102e-06
TCONS_00073557	102170796	MYO16	Novel_lncRNA	102186700	SEL1L2	0.997498	9.38031e-06
TCONS_00121767	102189162	ABHD2	Novel_lncRNA	102184264	MAL2	0.997488	9.45487e-06
XR_001917947.1	102184972	LOC102184972	Annotated_lncRNA	102176721	LOC102176721	0.997483	9.49343e-06
TCONS_00028249	XLOC_017916	XLOC_017916	Novel_lncRNA	102181613	COLEC10	0.997449	9.75024e-06
TCONS_00126170	102186348	CSRNP1	Novel_lncRNA	102172037	LOC102172037	0.997413	1.0032e-05
TCONS_00008012	XLOC_005237	XLOC_005237	Novel_lncRNA	102176665	PCNX2	0.997403	1.01099e-05
TCONS_00124841	108638635	MUSTN1	Novel_lncRNA	102182228	AMD1	0.997283	1.10601e-05
TCONS_00088675	100860822	CRSP-2	Novel_lncRNA	102178904	LYSMD3	0.997257	1.12746e-05
TCONS_00008012	XLOC_005237	XLOC_005237	Novel_lncRNA	102185866	LOC102185866	0.99718	1.19146e-05
TCONS_00150002	102169739	KCNJ5	Novel_lncRNA	108634137	ZNF485	0.997153	1.21486e-05
TCONS_00126170	102186348	CSRNP1	Novel_lncRNA	102173010	RDH12	0.997142	1.22427e-05
TCONS_00055857	102187770	PM20D2	Novel_lncRNA	102186180	IFRD1	0.997102	1.25837e-05
TCONS_00134767	XLOC_084658	XLOC_084658	Novel_lncRNA	102174832	LOC102174832	0.997025	1.32661e-05
TCONS_00134767	XLOC_084658	XLOC_084658	Novel_lncRNA	102173311	TEX29	0.996988	1.35928e-05
XR_001917947.1	102184972	LOC102184972	Annotated_lncRNA	102190837	SYT6	0.996986	1.36085e-05
TCONS_00085732	102184828	SLC30A8	Novel_lncRNA	102176665	PCNX2	0.996957	1.38793e-05
TCONS_00005111	XLOC_003282	XLOC_003282	Novel_lncRNA	102176665	PCNX2	0.996957	1.38793e-05
TCONS_00005969	XLOC_003916	XLOC_003916	Novel_lncRNA	102176665	PCNX2	0.996957	1.38793e-05
TCONS_00026307	XLOC_016605	XLOC_016605	Novel_lncRNA	102176665	PCNX2	0.996957	1.38793e-05
TCONS_00075496	XLOC_048169	XLOC_048169	Novel_lncRNA	102176665	PCNX2	0.996957	1.38793e-05
TCONS_00099045	XLOC_063218	XLOC_063218	Novel_lncRNA	102176665	PCNX2	0.996957	1.38793e-05
TCONS_00099072	XLOC_063244	XLOC_063244	Novel_lncRNA	102176665	PCNX2	0.996957	1.38793e-05
TCONS_00132942	XLOC_083468	XLOC_083468	Novel_lncRNA	102176665	PCNX2	0.996957	1.38793e-05
TCONS_00133549	XLOC_083880	XLOC_083880	Novel_lncRNA	102176665	PCNX2	0.996957	1.38793e-05
TCONS_00135003	XLOC_084795	XLOC_084795	Novel_lncRNA	102176665	PCNX2	0.996957	1.38793e-05
TCONS_00154695	XLOC_097072	XLOC_097072	Novel_lncRNA	102176665	PCNX2	0.996957	1.38793e-05
TCONS_00126170	102186348	CSRNP1	Novel_lncRNA	102184744	C17H22orf31	0.996952	1.39235e-05
TCONS_00026838	102186180	IFRD1	Novel_lncRNA	102178789	CPXM2	0.996922	1.41937e-05
TCONS_00055857	102187770	PM20D2	Novel_lncRNA	102184423	SLC27A6	0.996916	1.42541e-05
TCONS_00150002	102169739	KCNJ5	Novel_lncRNA	102168456	KIAA0101	0.996895	1.44451e-05
TCONS_00150002	102169739	KCNJ5	Novel_lncRNA	102186909	ADAMTS7	0.996877	1.46106e-05
TCONS_00008012	XLOC_005237	XLOC_005237	Novel_lncRNA	102179212	PHYH	0.996875	1.46287e-05
TCONS_00121767	102189162	ABHD2	Novel_lncRNA	102182013	PPP2CB	0.996848	1.48848e-05
TCONS_00026838	102186180	IFRD1	Novel_lncRNA	102189717	LRFN5	0.996838	1.49854e-05
TCONS_00134756	102191574	LIPG	Novel_lncRNA	102186586	RNF14	0.996817	1.51766e-05
TCONS_00008012	XLOC_005237	XLOC_005237	Novel_lncRNA	102177234	SPINK9	0.996808	1.52642e-05
TCONS_00088675	100860822	CRSP-2	Novel_lncRNA	102169690	LOC102169690	0.996748	1.58478e-05
TCONS_00008012	XLOC_005237	XLOC_005237	Novel_lncRNA	102176354	LOC102176354	0.996701	1.63032e-05
TCONS_00150002	102169739	KCNJ5	Novel_lncRNA	108636241	LOC108636241	0.996698	1.63378e-05
XR_001917947.1	102184972	LOC102184972	Annotated_lncRNA	102179932	CPZ	0.996686	1.64566e-05
TCONS_00073557	102170796	MYO16	Novel_lncRNA	102174628	LOC102174628	0.996664	1.6678e-05
TCONS_00026838	102186180	IFRD1	Novel_lncRNA	102168984	TNMD	0.996639	1.69208e-05
TCONS_00126170	102186348	CSRNP1	Novel_lncRNA	108635463	LOC108635463	0.996637	1.69459e-05
TCONS_00041415	XLOC_026378	XLOC_026378	Novel_lncRNA	102186348	CSRNP1	0.996617	1.7151e-05
TCONS_00150002	102169739	KCNJ5	Novel_lncRNA	102185957	GSC	0.996585	1.74725e-05
TCONS_00085732	102184828	SLC30A8	Novel_lncRNA	102169753	LOC102169753	0.996537	1.79686e-05
TCONS_00005111	XLOC_003282	XLOC_003282	Novel_lncRNA	102169753	LOC102169753	0.996537	1.79686e-05
TCONS_00005969	XLOC_003916	XLOC_003916	Novel_lncRNA	102169753	LOC102169753	0.996537	1.79686e-05
TCONS_00026307	XLOC_016605	XLOC_016605	Novel_lncRNA	102169753	LOC102169753	0.996537	1.79686e-05
TCONS_00075496	XLOC_048169	XLOC_048169	Novel_lncRNA	102169753	LOC102169753	0.996537	1.79686e-05
TCONS_00099045	XLOC_063218	XLOC_063218	Novel_lncRNA	102169753	LOC102169753	0.996537	1.79686e-05
TCONS_00099072	XLOC_063244	XLOC_063244	Novel_lncRNA	102169753	LOC102169753	0.996537	1.79686e-05
TCONS_00132942	XLOC_083468	XLOC_083468	Novel_lncRNA	102169753	LOC102169753	0.996537	1.79686e-05
TCONS_00133549	XLOC_083880	XLOC_083880	Novel_lncRNA	102169753	LOC102169753	0.996537	1.79686e-05
TCONS_00135003	XLOC_084795	XLOC_084795	Novel_lncRNA	102169753	LOC102169753	0.996537	1.79686e-05
TCONS_00154695	XLOC_097072	XLOC_097072	Novel_lncRNA	102169753	LOC102169753	0.996537	1.79686e-05
TCONS_00124841	108638635	MUSTN1	Novel_lncRNA	102179572	ACTR1B	0.996462	1.87561e-05
TCONS_00124841	108638635	MUSTN1	Novel_lncRNA	102175468	NUDT4	0.99637	1.97377e-05
TCONS_00150002	102169739	KCNJ5	Novel_lncRNA	102173955	LOC102173955	0.996349	1.99652e-05
TCONS_00041415	XLOC_026378	XLOC_026378	Novel_lncRNA	102170206	FGF4	0.996331	2.01631e-05
TCONS_00088675	100860822	CRSP-2	Novel_lncRNA	102188630	DDX4	0.996325	2.02282e-05
TCONS_00088675	100860822	CRSP-2	Novel_lncRNA	102171188	RASD1	0.996319	2.02958e-05
TCONS_00026838	102186180	IFRD1	Novel_lncRNA	102183698	CGREF1	0.996263	2.09217e-05
TCONS_00085732	102184828	SLC30A8	Novel_lncRNA	102185866	LOC102185866	0.996248	2.10873e-05
TCONS_00005111	XLOC_003282	XLOC_003282	Novel_lncRNA	102185866	LOC102185866	0.996248	2.10873e-05
TCONS_00005969	XLOC_003916	XLOC_003916	Novel_lncRNA	102185866	LOC102185866	0.996248	2.10873e-05
TCONS_00026307	XLOC_016605	XLOC_016605	Novel_lncRNA	102185866	LOC102185866	0.996248	2.10873e-05
TCONS_00075496	XLOC_048169	XLOC_048169	Novel_lncRNA	102185866	LOC102185866	0.996248	2.10873e-05
TCONS_00099045	XLOC_063218	XLOC_063218	Novel_lncRNA	102185866	LOC102185866	0.996248	2.10873e-05
TCONS_00099072	XLOC_063244	XLOC_063244	Novel_lncRNA	102185866	LOC102185866	0.996248	2.10873e-05
TCONS_00132942	XLOC_083468	XLOC_083468	Novel_lncRNA	102185866	LOC102185866	0.996248	2.10873e-05
TCONS_00133549	XLOC_083880	XLOC_083880	Novel_lncRNA	102185866	LOC102185866	0.996248	2.10873e-05
TCONS_00135003	XLOC_084795	XLOC_084795	Novel_lncRNA	102185866	LOC102185866	0.996248	2.10873e-05
TCONS_00154695	XLOC_097072	XLOC_097072	Novel_lncRNA	102185866	LOC102185866	0.996248	2.10873e-05
TCONS_00150002	102169739	KCNJ5	Novel_lncRNA	102176359	SMARCD2	0.996243	2.11447e-05
TCONS_00028249	XLOC_017916	XLOC_017916	Novel_lncRNA	102191086	COCH	0.996237	2.12118e-05
XR_001917947.1	102184972	LOC102184972	Annotated_lncRNA	102174348	CRABP2	0.996178	2.18813e-05
TCONS_00150002	102169739	KCNJ5	Novel_lncRNA	102187186	SGCE	0.996175	2.19205e-05
XR_001917947.1	102184972	LOC102184972	Annotated_lncRNA	102178789	CPXM2	0.996174	2.1925e-05
TCONS_00150002	102169739	KCNJ5	Novel_lncRNA	108637763	LOC108637763	0.996109	2.26836e-05
TCONS_00150002	102169739	KCNJ5	Novel_lncRNA	102187437	SLITRK3	0.996036	2.35399e-05
TCONS_00088675	100860822	CRSP-2	Novel_lncRNA	102190054	HIPK3	0.996012	2.38247e-05
TCONS_00026838	102186180	IFRD1	Novel_lncRNA	102180462	IGFBP6	0.995989	2.41008e-05
TCONS_00150002	102169739	KCNJ5	Novel_lncRNA	102186130	RAD51AP2	0.995972	2.42987e-05
TCONS_00121767	102189162	ABHD2	Novel_lncRNA	102170862	KLB	0.995964	2.43969e-05
TCONS_00008012	XLOC_005237	XLOC_005237	Novel_lncRNA	102182013	PPP2CB	0.995915	2.50003e-05
TCONS_00121767	102189162	ABHD2	Novel_lncRNA	102191537	FBXO32	0.9959	2.51838e-05
TCONS_00121767	102189162	ABHD2	Novel_lncRNA	102181057	STAU2	0.99586	2.56758e-05
TCONS_00150002	102169739	KCNJ5	Novel_lncRNA	102189738	LOC102189738	0.995829	2.60597e-05
TCONS_00028249	XLOC_017916	XLOC_017916	Novel_lncRNA	102186820	LPAR3	0.995799	2.64383e-05
TCONS_00055857	102187770	PM20D2	Novel_lncRNA	108638635	MUSTN1	0.995793	2.65104e-05
TCONS_00150002	102169739	KCNJ5	Novel_lncRNA	102179440	SYT17	0.995775	2.67364e-05
TCONS_00085732	102184828	SLC30A8	Novel_lncRNA	102179212	PHYH	0.995775	2.67427e-05
TCONS_00005111	XLOC_003282	XLOC_003282	Novel_lncRNA	102179212	PHYH	0.995775	2.67427e-05
TCONS_00005969	XLOC_003916	XLOC_003916	Novel_lncRNA	102179212	PHYH	0.995775	2.67427e-05
TCONS_00026307	XLOC_016605	XLOC_016605	Novel_lncRNA	102179212	PHYH	0.995775	2.67427e-05
TCONS_00075496	XLOC_048169	XLOC_048169	Novel_lncRNA	102179212	PHYH	0.995775	2.67427e-05
TCONS_00099045	XLOC_063218	XLOC_063218	Novel_lncRNA	102179212	PHYH	0.995775	2.67427e-05
TCONS_00099072	XLOC_063244	XLOC_063244	Novel_lncRNA	102179212	PHYH	0.995775	2.67427e-05
TCONS_00132942	XLOC_083468	XLOC_083468	Novel_lncRNA	102179212	PHYH	0.995775	2.67427e-05
TCONS_00133549	XLOC_083880	XLOC_083880	Novel_lncRNA	102179212	PHYH	0.995775	2.67427e-05
TCONS_00135003	XLOC_084795	XLOC_084795	Novel_lncRNA	102179212	PHYH	0.995775	2.67427e-05
TCONS_00154695	XLOC_097072	XLOC_097072	Novel_lncRNA	102179212	PHYH	0.995775	2.67427e-05
TCONS_00085732	102184828	SLC30A8	Novel_lncRNA	102184797	GABRA4	0.995768	2.6832e-05
TCONS_00005111	XLOC_003282	XLOC_003282	Novel_lncRNA	102184797	GABRA4	0.995768	2.6832e-05
TCONS_00005969	XLOC_003916	XLOC_003916	Novel_lncRNA	102184797	GABRA4	0.995768	2.6832e-05
TCONS_00026307	XLOC_016605	XLOC_016605	Novel_lncRNA	102184797	GABRA4	0.995768	2.6832e-05
TCONS_00075496	XLOC_048169	XLOC_048169	Novel_lncRNA	102184797	GABRA4	0.995768	2.6832e-05
TCONS_00099045	XLOC_063218	XLOC_063218	Novel_lncRNA	102184797	GABRA4	0.995768	2.6832e-05
TCONS_00099072	XLOC_063244	XLOC_063244	Novel_lncRNA	102184797	GABRA4	0.995768	2.6832e-05
TCONS_00132942	XLOC_083468	XLOC_083468	Novel_lncRNA	102184797	GABRA4	0.995768	2.6832e-05
TCONS_00133549	XLOC_083880	XLOC_083880	Novel_lncRNA	102184797	GABRA4	0.995768	2.6832e-05
TCONS_00135003	XLOC_084795	XLOC_084795	Novel_lncRNA	102184797	GABRA4	0.995768	2.6832e-05
TCONS_00154695	XLOC_097072	XLOC_097072	Novel_lncRNA	102184797	GABRA4	0.995768	2.6832e-05
TCONS_00150002	102169739	KCNJ5	Novel_lncRNA	102179945	NEFL	0.995756	2.69848e-05
TCONS_00150002	102169739	KCNJ5	Novel_lncRNA	102182661	ABCA13	0.995737	2.72189e-05
TCONS_00041415	XLOC_026378	XLOC_026378	Novel_lncRNA	102186444	UHRF1BP1	0.995732	2.72794e-05
TCONS_00026838	102186180	IFRD1	Novel_lncRNA	102175316	ANGPTL5	0.995703	2.76571e-05
TCONS_00026838	102186180	IFRD1	Novel_lncRNA	102169716	IER3	0.995685	2.78939e-05
TCONS_00008012	XLOC_005237	XLOC_005237	Novel_lncRNA	102169753	LOC102169753	0.99568	2.79586e-05
TCONS_00085732	102184828	SLC30A8	Novel_lncRNA	102176354	LOC102176354	0.995679	2.79688e-05
TCONS_00005111	XLOC_003282	XLOC_003282	Novel_lncRNA	102176354	LOC102176354	0.995679	2.79688e-05
TCONS_00005969	XLOC_003916	XLOC_003916	Novel_lncRNA	102176354	LOC102176354	0.995679	2.79688e-05
TCONS_00026307	XLOC_016605	XLOC_016605	Novel_lncRNA	102176354	LOC102176354	0.995679	2.79688e-05
TCONS_00075496	XLOC_048169	XLOC_048169	Novel_lncRNA	102176354	LOC102176354	0.995679	2.79688e-05
TCONS_00099045	XLOC_063218	XLOC_063218	Novel_lncRNA	102176354	LOC102176354	0.995679	2.79688e-05
TCONS_00099072	XLOC_063244	XLOC_063244	Novel_lncRNA	102176354	LOC102176354	0.995679	2.79688e-05
TCONS_00132942	XLOC_083468	XLOC_083468	Novel_lncRNA	102176354	LOC102176354	0.995679	2.79688e-05
TCONS_00133549	XLOC_083880	XLOC_083880	Novel_lncRNA	102176354	LOC102176354	0.995679	2.79688e-05
TCONS_00135003	XLOC_084795	XLOC_084795	Novel_lncRNA	102176354	LOC102176354	0.995679	2.79688e-05
TCONS_00154695	XLOC_097072	XLOC_097072	Novel_lncRNA	102176354	LOC102176354	0.995679	2.79688e-05
TCONS_00121767	102189162	ABHD2	Novel_lncRNA	102181576	CCDC149	0.995657	2.82504e-05
TCONS_00150002	102169739	KCNJ5	Novel_lncRNA	102179782	FGF14	0.995651	2.83258e-05
TCONS_00083603	XLOC_053332	XLOC_053332	Novel_lncRNA	102175524	SPEF2	0.99564	2.84691e-05
TCONS_00026838	102186180	IFRD1	Novel_lncRNA	102171252	SLC25A25	0.995631	2.85946e-05
TCONS_00124841	108638635	MUSTN1	Novel_lncRNA	102180163	KLHL40	0.995608	2.88912e-05
TCONS_00121767	102189162	ABHD2	Novel_lncRNA	102181955	TPD52L1	0.995602	2.89742e-05
TCONS_00026838	102186180	IFRD1	Novel_lncRNA	102188074	SPTBN4	0.995523	3.0026e-05
TCONS_00088675	100860822	CRSP-2	Novel_lncRNA	102171372	MINA	0.995506	3.02435e-05
TCONS_00041415	XLOC_026378	XLOC_026378	Novel_lncRNA	102180054	METTL21C	0.995444	3.10828e-05
TCONS_00088675	100860822	CRSP-2	Novel_lncRNA	102187770	PM20D2	0.995431	3.12672e-05
TCONS_00041415	XLOC_026378	XLOC_026378	Novel_lncRNA	102170630	ZNF274	0.995415	3.14803e-05
TCONS_00150002	102169739	KCNJ5	Novel_lncRNA	102172211	VOPP1	0.995413	3.15186e-05
TCONS_00085732	102184828	SLC30A8	Novel_lncRNA	102175524	SPEF2	0.995406	3.16064e-05
TCONS_00005111	XLOC_003282	XLOC_003282	Novel_lncRNA	102175524	SPEF2	0.995406	3.16064e-05
TCONS_00005969	XLOC_003916	XLOC_003916	Novel_lncRNA	102175524	SPEF2	0.995406	3.16064e-05
TCONS_00026307	XLOC_016605	XLOC_016605	Novel_lncRNA	102175524	SPEF2	0.995406	3.16064e-05
TCONS_00075496	XLOC_048169	XLOC_048169	Novel_lncRNA	102175524	SPEF2	0.995406	3.16064e-05
TCONS_00099045	XLOC_063218	XLOC_063218	Novel_lncRNA	102175524	SPEF2	0.995406	3.16064e-05
TCONS_00099072	XLOC_063244	XLOC_063244	Novel_lncRNA	102175524	SPEF2	0.995406	3.16064e-05
TCONS_00132942	XLOC_083468	XLOC_083468	Novel_lncRNA	102175524	SPEF2	0.995406	3.16064e-05
TCONS_00133549	XLOC_083880	XLOC_083880	Novel_lncRNA	102175524	SPEF2	0.995406	3.16064e-05
TCONS_00135003	XLOC_084795	XLOC_084795	Novel_lncRNA	102175524	SPEF2	0.995406	3.16064e-05
TCONS_00154695	XLOC_097072	XLOC_097072	Novel_lncRNA	102175524	SPEF2	0.995406	3.16064e-05
TCONS_00151400	XLOC_094632	XLOC_094632	Novel_lncRNA	102179572	ACTR1B	0.995346	3.24358e-05
TCONS_00026838	102186180	IFRD1	Novel_lncRNA	102169308	OTOR	0.995339	3.25381e-05
TCONS_00008012	XLOC_005237	XLOC_005237	Novel_lncRNA	102176807	AMPD3	0.99529	3.32225e-05
TCONS_00026838	102186180	IFRD1	Novel_lncRNA	102170840	COL11A1	0.99518	3.47947e-05
TCONS_00151400	XLOC_094632	XLOC_094632	Novel_lncRNA	102180275	C24H18orf63	0.995147	3.52646e-05
TCONS_00124841	108638635	MUSTN1	Novel_lncRNA	102170630	ZNF274	0.995124	3.56062e-05
XR_001917947.1	102184972	LOC102184972	Annotated_lncRNA	102188074	SPTBN4	0.995104	3.58939e-05
TCONS_00088675	100860822	CRSP-2	Novel_lncRNA	102184911	DUOXA2	0.995076	3.63049e-05
TCONS_00121767	102189162	ABHD2	Novel_lncRNA	108633842	LOC108633842	0.995072	3.6361e-05
TCONS_00083603	XLOC_053332	XLOC_053332	Novel_lncRNA	102176807	AMPD3	0.995072	3.63696e-05
TCONS_00055857	102187770	PM20D2	Novel_lncRNA	102186972	NTSR2	0.995066	3.64538e-05
TCONS_00026838	102186180	IFRD1	Novel_lncRNA	108637649	C1QTNF4	0.995029	3.70099e-05
XR_001917947.1	102184972	LOC102184972	Annotated_lncRNA	102185061	KCNH2	0.995016	3.71952e-05
TCONS_00124841	108638635	MUSTN1	Novel_lncRNA	108638635	MUSTN1	0.995015	3.72083e-05
TCONS_00055857	102187770	PM20D2	Novel_lncRNA	102178654	C18H16orf70	0.994998	3.74634e-05
TCONS_00028249	XLOC_017916	XLOC_017916	Novel_lncRNA	102174605	LOC102174605	0.994982	3.77086e-05
TCONS_00124841	108638635	MUSTN1	Novel_lncRNA	102190172	CREBRF	0.994973	3.78491e-05
TCONS_00151400	XLOC_094632	XLOC_094632	Novel_lncRNA	100861279	LOC100861279	0.994963	3.79881e-05
TCONS_00151400	XLOC_094632	XLOC_094632	Novel_lncRNA	102186348	CSRNP1	0.994955	3.8109e-05
TCONS_00026838	102186180	IFRD1	Novel_lncRNA	102174348	CRABP2	0.994952	3.81587e-05
TCONS_00121767	102189162	ABHD2	Novel_lncRNA	102174242	USP32	0.994949	3.81986e-05
XR_001917947.1	102184972	LOC102184972	Annotated_lncRNA	102183698	CGREF1	0.994927	3.85312e-05
XR_001917947.1	102184972	LOC102184972	Annotated_lncRNA	102168984	TNMD	0.99492	3.86509e-05
TCONS_00151400	XLOC_094632	XLOC_094632	Novel_lncRNA	102174880	STRN3	0.994919	3.86647e-05
TCONS_00121767	102189162	ABHD2	Novel_lncRNA	102179035	CYLD	0.994863	3.95119e-05
TCONS_00151400	XLOC_094632	XLOC_094632	Novel_lncRNA	102181576	CCDC149	0.994834	3.99576e-05
TCONS_00028249	XLOC_017916	XLOC_017916	Novel_lncRNA	102176083	SRSF4	0.994834	3.99687e-05
TCONS_00041415	XLOC_026378	XLOC_026378	Novel_lncRNA	102171188	RASD1	0.994747	4.13191e-05
TCONS_00041415	XLOC_026378	XLOC_026378	Novel_lncRNA	100860822	CRSP-2	0.99473	4.15915e-05
TCONS_00026838	102186180	IFRD1	Novel_lncRNA	108637396	LOC108637396	0.994682	4.2348e-05
TCONS_00083603	XLOC_053332	XLOC_053332	Novel_lncRNA	102182013	PPP2CB	0.994673	4.24887e-05
TCONS_00083603	XLOC_053332	XLOC_053332	Novel_lncRNA	102174882	ACVR1C	0.994654	4.27908e-05
TCONS_00088675	100860822	CRSP-2	Novel_lncRNA	102186348	CSRNP1	0.994634	4.31211e-05
TCONS_00150002	102169739	KCNJ5	Novel_lncRNA	102190018	GPR37	0.994597	4.37176e-05
TCONS_00126170	102186348	CSRNP1	Novel_lncRNA	102172616	UNC13A	0.994583	4.39442e-05
TCONS_00008012	XLOC_005237	XLOC_005237	Novel_lncRNA	102184797	GABRA4	0.994577	4.40395e-05
TCONS_00150002	102169739	KCNJ5	Novel_lncRNA	102173018	E2F1	0.994573	4.4098e-05
TCONS_00055857	102187770	PM20D2	Novel_lncRNA	102170485	FLNC	0.994567	4.41995e-05
XR_001917947.1	102184972	LOC102184972	Annotated_lncRNA	102189717	LRFN5	0.994559	4.43229e-05
TCONS_00085732	102184828	SLC30A8	Novel_lncRNA	102177234	SPINK9	0.994503	4.52346e-05
TCONS_00005111	XLOC_003282	XLOC_003282	Novel_lncRNA	102177234	SPINK9	0.994503	4.52346e-05
TCONS_00005969	XLOC_003916	XLOC_003916	Novel_lncRNA	102177234	SPINK9	0.994503	4.52346e-05
TCONS_00026307	XLOC_016605	XLOC_016605	Novel_lncRNA	102177234	SPINK9	0.994503	4.52346e-05
TCONS_00075496	XLOC_048169	XLOC_048169	Novel_lncRNA	102177234	SPINK9	0.994503	4.52346e-05
TCONS_00099045	XLOC_063218	XLOC_063218	Novel_lncRNA	102177234	SPINK9	0.994503	4.52346e-05
TCONS_00099072	XLOC_063244	XLOC_063244	Novel_lncRNA	102177234	SPINK9	0.994503	4.52346e-05
TCONS_00132942	XLOC_083468	XLOC_083468	Novel_lncRNA	102177234	SPINK9	0.994503	4.52346e-05
TCONS_00133549	XLOC_083880	XLOC_083880	Novel_lncRNA	102177234	SPINK9	0.994503	4.52346e-05
TCONS_00135003	XLOC_084795	XLOC_084795	Novel_lncRNA	102177234	SPINK9	0.994503	4.52346e-05
TCONS_00154695	XLOC_097072	XLOC_097072	Novel_lncRNA	102177234	SPINK9	0.994503	4.52346e-05
TCONS_00088675	100860822	CRSP-2	Novel_lncRNA	100861245	PLIN2	0.994485	4.55333e-05
TCONS_00008012	XLOC_005237	XLOC_005237	Novel_lncRNA	102175524	SPEF2	0.994447	4.61727e-05
TCONS_00026838	102186180	IFRD1	Novel_lncRNA	102182694	CXCL14	0.994402	4.69183e-05
[truncated: 6,536 more rows]
