# Supplementary material for: Identification and Characterization of lncRNAs Expression Profile Related to Goat Skeletal Muscle at Different Development Stages
Source: Animals (Basel). 2022 Oct 6;12(19):2683. doi: 10.3390/ani12192683 (PMC9558979; doi:10.3390/ani12192683)
Supplement: Supplementary file 1 [file animals-12-02683-s001.zip › Supplementary TableS9.xlsx]

## Sheet: 1 month VS 9 months trans-GO
Table S9 GO enrichment analysis of protein-coding genes co-expressed with lncRNAs.
category	ID	Description	GeneRatio	BgRatio	pvalue	p.adjust	qvalue	gene	ListHits	ListTotal	PopHits	PopTotal	pval	padj(FDR)	Enrichment_score
biological_process	GO:0007565	female pregnancy	4/46	177/18862	0.000899353	0.141117	0.116569	TLE6/AGRP/NPPA/GJB2	4	46	177	18862	0.0869565	0.00938395	0.107915
biological_process	GO:0007141	male meiosis I	2/46	23/18862	0.00142484	0.141117	0.116569	DMC1/DNMT3L	2	46	23	18862	0.0434783	0.00121938	0.0280458
biological_process	GO:0007631	feeding behavior	3/46	93/18862	0.00151082	0.141117	0.116569	AGRP/PPY/POU4F1	3	46	93	18862	0.0652174	0.00493055	0.0756017
biological_process	GO:0044706	multi-multicellular organism process	4/46	204/18862	0.00151968	0.141117	0.116569	TLE6/AGRP/NPPA/GJB2	4	46	204	18862	0.0869565	0.0108154	0.124377
biological_process	GO:0007218	neuropeptide signaling pathway	3/46	106/18862	0.00219702	0.141117	0.116569	AGRP/PPY/NPPA	3	46	106	18862	0.0652174	0.00561976	0.0861697
biological_process	GO:0048561	establishment of animal organ orientation	1/46	1/18862	0.00243877	0.141117	0.116569	IRX4	1	46	1	18862	0.0217391	5.30166e-05	0.00243877
biological_process	GO:0048571	long-day photoperiodism	1/46	1/18862	0.00243877	0.141117	0.116569	AGRP	1	46	1	18862	0.0217391	5.30166e-05	0.00243877
biological_process	GO:0051355	proprioception involved in equilibrioception	1/46	1/18862	0.00243877	0.141117	0.116569	POU4F1	1	46	1	18862	0.0217391	5.30166e-05	0.00243877
biological_process	GO:0052373	suppression of symbiont entry into host by host	1/46	1/18862	0.00243877	0.141117	0.116569	ZG16	1	46	1	18862	0.0217391	5.30166e-05	0.00243877
biological_process	GO:2001207	regulation of transcription elongation from RNA polymerase I promoter	1/46	1/18862	0.00243877	0.141117	0.116569	POU4F1	1	46	1	18862	0.0217391	5.30166e-05	0.00243877
biological_process	GO:2001208	negative regulation of transcription elongation by RNA polymerase I	1/46	1/18862	0.00243877	0.141117	0.116569	POU4F1	1	46	1	18862	0.0217391	5.30166e-05	0.00243877
biological_process	GO:0003180	aortic valve morphogenesis	2/46	31/18862	0.00258648	0.141117	0.116569	NKX2-5/NPPA	2	46	31	18862	0.0434783	0.00164352	0.0378009
biological_process	GO:0048536	spleen development	2/46	33/18862	0.00292782	0.141117	0.116569	NKX2-5/NKX3-2	2	46	33	18862	0.0434783	0.00174955	0.0402396
biological_process	GO:0003176	aortic valve development	2/46	36/18862	0.00347723	0.141117	0.116569	NKX2-5/NPPA	2	46	36	18862	0.0434783	0.0019086	0.0438978
biological_process	GO:0045823	positive regulation of heart contraction	2/46	38/18862	0.00386816	0.141117	0.116569	NKX2-5/NPPA	2	46	38	18862	0.0434783	0.00201463	0.0463365
biological_process	GO:1903524	positive regulation of blood circulation	2/46	40/18862	0.00427857	0.141117	0.116569	NKX2-5/NPPA	2	46	40	18862	0.0434783	0.00212067	0.0487753
biological_process	GO:1905314	semi-lunar valve development	2/46	41/18862	0.00449103	0.141117	0.116569	NKX2-5/NPPA	2	46	41	18862	0.0434783	0.00217368	0.0499947
biological_process	GO:0021538	epithalamus development	1/46	2/18862	0.00487171	0.141117	0.116569	POU4F1	1	46	2	18862	0.0217391	0.000106033	0.00487753
biological_process	GO:0021986	habenula development	1/46	2/18862	0.00487171	0.141117	0.116569	POU4F1	1	46	2	18862	0.0217391	0.000106033	0.00487753
biological_process	GO:0044752	response to human chorionic gonadotropin	1/46	2/18862	0.00487171	0.141117	0.116569	GJB2	1	46	2	18862	0.0217391	0.000106033	0.00487753
biological_process	GO:0045299	otolith mineralization	1/46	2/18862	0.00487171	0.141117	0.116569	OC90	1	46	2	18862	0.0217391	0.000106033	0.00487753
biological_process	GO:0048560	establishment of anatomical structure orientation	1/46	2/18862	0.00487171	0.141117	0.116569	IRX4	1	46	2	18862	0.0217391	0.000106033	0.00487753
biological_process	GO:0055010	ventricular cardiac muscle tissue morphogenesis	2/46	44/18862	0.00515713	0.141117	0.116569	NKX2-5/POU4F1	2	46	44	18862	0.0434783	0.00233273	0.0536528
biological_process	GO:0007140	male meiotic nuclear division	2/46	46/18862	0.0056249	0.141117	0.116569	DMC1/DNMT3L	2	46	46	18862	0.0434783	0.00243877	0.0560916
biological_process	GO:0003229	ventricular cardiac muscle tissue development	2/46	50/18862	0.00661646	0.141117	0.116569	NKX2-5/POU4F1	2	46	50	18862	0.0434783	0.00265083	0.0609691
biological_process	GO:0003221	right ventricular cardiac muscle tissue morphogenesis	1/46	3/18862	0.00729886	0.141117	0.116569	NKX2-5	1	46	3	18862	0.0217391	0.00015905	0.0073163
biological_process	GO:0003285	septum secundum development	1/46	3/18862	0.00729886	0.141117	0.116569	NKX2-5	1	46	3	18862	0.0217391	0.00015905	0.0073163
biological_process	GO:0018094	protein polyglycylation	1/46	3/18862	0.00729886	0.141117	0.116569	TTLL10	1	46	3	18862	0.0217391	0.00015905	0.0073163
biological_process	GO:0019276	UDP-N-acetylgalactosamine metabolic process	1/46	3/18862	0.00729886	0.141117	0.116569	B4GALNT2	1	46	3	18862	0.0217391	0.00015905	0.0073163
biological_process	GO:0055011	atrial cardiac muscle cell differentiation	1/46	3/18862	0.00729886	0.141117	0.116569	NKX2-5	1	46	3	18862	0.0217391	0.00015905	0.0073163
biological_process	GO:0055014	atrial cardiac muscle cell development	1/46	3/18862	0.00729886	0.141117	0.116569	NKX2-5	1	46	3	18862	0.0217391	0.00015905	0.0073163
biological_process	GO:0072244	metanephric glomerular epithelium development	1/46	3/18862	0.00729886	0.141117	0.116569	NPHS2	1	46	3	18862	0.0217391	0.00015905	0.0073163
biological_process	GO:0072248	metanephric glomerular visceral epithelial cell differentiation	1/46	3/18862	0.00729886	0.141117	0.116569	NPHS2	1	46	3	18862	0.0217391	0.00015905	0.0073163
biological_process	GO:0072249	metanephric glomerular visceral epithelial cell development	1/46	3/18862	0.00729886	0.141117	0.116569	NPHS2	1	46	3	18862	0.0217391	0.00015905	0.0073163
biological_process	GO:0072312	metanephric glomerular epithelial cell differentiation	1/46	3/18862	0.00729886	0.141117	0.116569	NPHS2	1	46	3	18862	0.0217391	0.00015905	0.0073163
biological_process	GO:0072313	metanephric glomerular epithelial cell development	1/46	3/18862	0.00729886	0.141117	0.116569	NPHS2	1	46	3	18862	0.0217391	0.00015905	0.0073163
biological_process	GO:1905642	negative regulation of DNA methylation	1/46	3/18862	0.00729886	0.141117	0.116569	DNMT3L	1	46	3	18862	0.0217391	0.00015905	0.0073163
biological_process	GO:0003179	heart valve morphogenesis	2/46	53/18862	0.00740844	0.141117	0.116569	NKX2-5/NPPA	2	46	53	18862	0.0434783	0.00280988	0.0646273
biological_process	GO:0060135	maternal process involved in female pregnancy	2/46	56/18862	0.00824113	0.141117	0.116569	AGRP/GJB2	2	46	56	18862	0.0434783	0.00296893	0.0682854
biological_process	GO:0010043	response to zinc ion	2/46	57/18862	0.00852763	0.141117	0.116569	KRT14/SLC30A8	2	46	57	18862	0.0434783	0.00302195	0.0695048
biological_process	GO:0055008	cardiac muscle tissue morphogenesis	2/46	57/18862	0.00852763	0.141117	0.116569	NKX2-5/POU4F1	2	46	57	18862	0.0434783	0.00302195	0.0695048
biological_process	GO:0007602	phototransduction	2/46	59/18862	0.00911393	0.141117	0.116569	OPN3/GRK7	2	46	59	18862	0.0434783	0.00312798	0.0719436
biological_process	GO:1903779	regulation of cardiac conduction	2/46	59/18862	0.00911393	0.141117	0.116569	NKX2-5/NPPA	2	46	59	18862	0.0434783	0.00312798	0.0719436
biological_process	GO:0007588	excretion	2/46	60/18862	0.00941367	0.141117	0.116569	NPHS2/SLC22A18	2	46	60	18862	0.0434783	0.003181	0.073163
biological_process	GO:0140115	export across plasma membrane	2/46	60/18862	0.00941367	0.141117	0.116569	SLC22A18/NPPA	2	46	60	18862	0.0434783	0.003181	0.073163
biological_process	GO:0090090	negative regulation of canonical Wnt signaling pathway	3/46	179/18862	0.00945949	0.141117	0.116569	TLE6/NKX2-5/IGFbiological_process1	3	46	179	18862	0.0652174	0.00948998	0.145513
biological_process	GO:0003170	heart valve development	2/46	61/18862	0.00971778	0.141117	0.116569	NKX2-5/NPPA	2	46	61	18862	0.0434783	0.00323402	0.0743824
biological_process	GO:0000730	DNA recombinase assembly	1/46	4/18862	0.00972021	0.141117	0.116569	DMC1	1	46	4	18862	0.0217391	0.000212067	0.00975506
biological_process	GO:0010025	wax biosynthetic process	1/46	4/18862	0.00972021	0.141117	0.116569	AWAT1	1	46	4	18862	0.0217391	0.000212067	0.00975506
biological_process	GO:0010166	wax metabolic process	1/46	4/18862	0.00972021	0.141117	0.116569	AWAT1	1	46	4	18862	0.0217391	0.000212067	0.00975506
biological_process	GO:0010735	positive regulation of transcription via serum response element binding	1/46	4/18862	0.00972021	0.141117	0.116569	NKX2-5	1	46	4	18862	0.0217391	0.000212067	0.00975506
biological_process	GO:0090735	DNA repair complex assembly	1/46	4/18862	0.00972021	0.141117	0.116569	DMC1	1	46	4	18862	0.0217391	0.000212067	0.00975506
biological_process	GO:1902261	positive regulation of delayed rectifier potassium channel activity	1/46	4/18862	0.00972021	0.141117	0.116569	NPPA	1	46	4	18862	0.0217391	0.000212067	0.00975506
biological_process	GO:1903766	positive regulation of potassium ion export across plasma membrane	1/46	4/18862	0.00972021	0.141117	0.116569	NPPA	1	46	4	18862	0.0217391	0.000212067	0.00975506
biological_process	GO:1905643	positive regulation of DNA methylation	1/46	4/18862	0.00972021	0.141117	0.116569	DNMT3L	1	46	4	18862	0.0217391	0.000212067	0.00975506
biological_process	GO:1905867	epididymis development	1/46	4/18862	0.00972021	0.141117	0.116569	GJB2	1	46	4	18862	0.0217391	0.000212067	0.00975506
biological_process	GO:0009584	detection of visible light	2/46	66/18862	0.0113031	0.149316	0.123342	OPN3/GRK7	2	46	66	18862	0.0434783	0.0034991	0.0804793
biological_process	GO:0060415	muscle tissue morphogenesis	2/46	67/18862	0.0116329	0.149316	0.123342	NKX2-5/POU4F1	2	46	67	18862	0.0434783	0.00355212	0.0816987
biological_process	GO:0019230	proprioception	1/46	5/18862	0.0121358	0.149316	0.123342	POU4F1	1	46	5	18862	0.0217391	0.000265083	0.0121938
biological_process	GO:0032776	DNA methylation on cytosine	1/46	5/18862	0.0121358	0.149316	0.123342	DNMT3L	1	46	5	18862	0.0217391	0.000265083	0.0121938
biological_process	GO:0042148	strand invasion	1/46	5/18862	0.0121358	0.149316	0.123342	DMC1	1	46	5	18862	0.0217391	0.000265083	0.0121938
biological_process	GO:0048022	negative regulation of melanin biosynthetic process	1/46	5/18862	0.0121358	0.149316	0.123342	OPN3	1	46	5	18862	0.0217391	0.000265083	0.0121938
biological_process	GO:0060136	embryonic process involved in female pregnancy	1/46	5/18862	0.0121358	0.149316	0.123342	TLE6	1	46	5	18862	0.0217391	0.000265083	0.0121938
biological_process	GO:0061088	regulation of sequestering of zinc ion	1/46	5/18862	0.0121358	0.149316	0.123342	SLC30A8	1	46	5	18862	0.0217391	0.000265083	0.0121938
biological_process	GO:1900377	negative regulation of secondary metabolite biosynthetic process	1/46	5/18862	0.0121358	0.149316	0.123342	OPN3	1	46	5	18862	0.0217391	0.000265083	0.0121938
biological_process	GO:1901857	positive regulation of cellular respiration	1/46	5/18862	0.0121358	0.149316	0.123342	OPN3	1	46	5	18862	0.0217391	0.000265083	0.0121938
biological_process	GO:0003208	cardiac ventricle morphogenesis	2/46	69/18862	0.0123052	0.149316	0.123342	NKX2-5/POU4F1	2	46	69	18862	0.0434783	0.00365815	0.0841374
biological_process	GO:0043583	ear development	3/46	202/18862	0.0131024	0.156651	0.129402	OC90/GJB2/NKX3-2	3	46	202	18862	0.0652174	0.0107094	0.16421
biological_process	GO:0048644	muscle organ morphogenesis	2/46	73/18862	0.0136997	0.159432	0.131699	NKX2-5/POU4F1	2	46	73	18862	0.0434783	0.00387022	0.089015
biological_process	GO:0055117	regulation of cardiac muscle contraction	2/46	75/18862	0.0144216	0.159432	0.131699	NKX2-5/NPPA	2	46	75	18862	0.0434783	0.00397625	0.0914537
biological_process	GO:0009637	response to blue light	1/46	6/18862	0.0145456	0.159432	0.131699	OPN3	1	46	6	18862	0.0217391	0.0003181	0.0146326
biological_process	GO:0016479	negative regulation of transcription by RNA polymerase I	1/46	6/18862	0.0145456	0.159432	0.131699	POU4F1	1	46	6	18862	0.0217391	0.0003181	0.0146326
biological_process	GO:0051891	positive regulation of cardioblast differentiation	1/46	6/18862	0.0145456	0.159432	0.131699	NKX2-5	1	46	6	18862	0.0217391	0.0003181	0.0146326
biological_process	GO:1990349	gap junction-mediated intercellular transport	1/46	6/18862	0.0145456	0.159432	0.131699	GJB2	1	46	6	18862	0.0217391	0.0003181	0.0146326
biological_process	GO:0007623	circadian rhythm	3/46	212/18862	0.0149038	0.159432	0.131699	OPN3/AGRP/SOX14	3	46	212	18862	0.0652174	0.0112395	0.172339
biological_process	GO:0030178	negative regulation of Wnt signaling pathway	3/46	212/18862	0.0149038	0.159432	0.131699	TLE6/NKX2-5/IGFbiological_process1	3	46	212	18862	0.0652174	0.0112395	0.172339
biological_process	GO:0009583	detection of light stimulus	2/46	77/18862	0.0151596	0.160062	0.132219	OPN3/GRK7	2	46	77	18862	0.0434783	0.00408228	0.0938925
biological_process	GO:0010496	intercellular transport	1/46	7/18862	0.0169496	0.166025	0.137145	GJB2	1	46	7	18862	0.0217391	0.000371117	0.0170714
biological_process	GO:0045003	double-strand break repair via synthesis-dependent strand annealing	1/46	7/18862	0.0169496	0.166025	0.137145	DMC1	1	46	7	18862	0.0217391	0.000371117	0.0170714
biological_process	GO:0045110	intermediate filament bundle assembly	1/46	7/18862	0.0169496	0.166025	0.137145	KRT14	1	46	7	18862	0.0217391	0.000371117	0.0170714
biological_process	GO:0048023	positive regulation of melanin biosynthetic process	1/46	7/18862	0.0169496	0.166025	0.137145	OPN3	1	46	7	18862	0.0217391	0.000371117	0.0170714
biological_process	GO:0050957	equilibrioception	1/46	7/18862	0.0169496	0.166025	0.137145	POU4F1	1	46	7	18862	0.0217391	0.000371117	0.0170714
biological_process	GO:1900378	positive regulation of secondary metabolite biosynthetic process	1/46	7/18862	0.0169496	0.166025	0.137145	OPN3	1	46	7	18862	0.0217391	0.000371117	0.0170714
biological_process	GO:0003223	ventricular compact myocardium morphogenesis	1/46	8/18862	0.019348	0.170977	0.141236	POU4F1	1	46	8	18862	0.0217391	0.000424133	0.0195101
biological_process	GO:0003228	atrial cardiac muscle tissue development	1/46	8/18862	0.019348	0.170977	0.141236	NKX2-5	1	46	8	18862	0.0217391	0.000424133	0.0195101
biological_process	GO:0032119	sequestering of zinc ion	1/46	8/18862	0.019348	0.170977	0.141236	SLC30A8	1	46	8	18862	0.0217391	0.000424133	0.0195101
biological_process	GO:0048840	otolith development	1/46	8/18862	0.019348	0.170977	0.141236	OC90	1	46	8	18862	0.0217391	0.000424133	0.0195101
biological_process	GO:0051890	regulation of cardioblast differentiation	1/46	8/18862	0.019348	0.170977	0.141236	NKX2-5	1	46	8	18862	0.0217391	0.000424133	0.0195101
biological_process	GO:0060372	regulation of atrial cardiac muscle cell membrane repolarization	1/46	8/18862	0.019348	0.170977	0.141236	NPPA	1	46	8	18862	0.0217391	0.000424133	0.0195101
biological_process	GO:0099004	calmodulin dependent kinase signaling pathway	1/46	8/18862	0.019348	0.170977	0.141236	PCP4	1	46	8	18862	0.0217391	0.000424133	0.0195101
biological_process	GO:1903764	regulation of potassium ion export across plasma membrane	1/46	8/18862	0.019348	0.170977	0.141236	NPPA	1	46	8	18862	0.0217391	0.000424133	0.0195101
biological_process	GO:1990961	xenobiotic detoxification by transmembrane export across the plasma membrane	1/46	8/18862	0.019348	0.170977	0.141236	SLC22A18	1	46	8	18862	0.0217391	0.000424133	0.0195101
biological_process	GO:0006942	regulation of striated muscle contraction	2/46	91/18862	0.0207647	0.181524	0.149948	NKX2-5/NPPA	2	46	91	18862	0.0434783	0.00482451	0.110964
biological_process	GO:0055015	ventricular cardiac muscle cell development	1/46	9/18862	0.0217406	0.184115	0.152089	NKX2-5	1	46	9	18862	0.0217391	0.00047715	0.0219489
biological_process	GO:0060452	positive regulation of cardiac muscle contraction	1/46	9/18862	0.0217406	0.184115	0.152089	NPPA	1	46	9	18862	0.0217391	0.00047715	0.0219489
biological_process	GO:2000253	positive regulation of feeding behavior	1/46	9/18862	0.0217406	0.184115	0.152089	AGRP	1	46	9	18862	0.0217391	0.00047715	0.0219489
biological_process	GO:0045666	positive regulation of neuron differentiation	2/46	94/18862	0.0220625	0.184915	0.152749	PCP4/NKX2-5	2	46	94	18862	0.0434783	0.00498356	0.114622
biological_process	GO:0009314	response to radiation	4/46	447/18862	0.0232024	0.192485	0.159002	OPN3/AGRP/GRK7/KRT14	4	46	447	18862	0.0869565	0.0236984	0.272532
biological_process	GO:0007168	receptor guanylyl cyclase signaling pathway	1/46	10/18862	0.0241274	0.194214	0.160431	NPPA	1	46	10	18862	0.0217391	0.000530166	0.0243877
biological_process	GO:0008343	adult feeding behavior	1/46	10/18862	0.0241274	0.194214	0.160431	AGRP	1	46	10	18862	0.0217391	0.000530166	0.0243877
biological_process	GO:0051643	endoplasmic reticulum localization	1/46	10/18862	0.0241274	0.194214	0.160431	TLE6	1	46	10	18862	0.0217391	0.000530166	0.0243877
biological_process	GO:0001967	suckling behavior	1/46	11/18862	0.0265086	0.200708	0.165795	POU4F1	1	46	11	18862	0.0217391	0.000583183	0.0268264
biological_process	GO:0006182	cGMP biosynthetic process	1/46	11/18862	0.0265086	0.200708	0.165795	NPPA	1	46	11	18862	0.0217391	0.000583183	0.0268264
biological_process	GO:0021559	trigeminal nerve development	1/46	11/18862	0.0265086	0.200708	0.165795	POU4F1	1	46	11	18862	0.0217391	0.000583183	0.0268264
biological_process	GO:0046710	GDP metabolic process	1/46	11/18862	0.0265086	0.200708	0.165795	LRGUK	1	46	11	18862	0.0217391	0.000583183	0.0268264
biological_process	GO:0071492	cellular response to UV-A	1/46	11/18862	0.0265086	0.200708	0.165795	OPN3	1	46	11	18862	0.0217391	0.000583183	0.0268264
biological_process	GO:0099624	atrial cardiac muscle cell membrane repolarization	1/46	11/18862	0.0265086	0.200708	0.165795	NPPA	1	46	11	18862	0.0217391	0.000583183	0.0268264
biological_process	GO:0030259	lipid glycosylation	1/46	12/18862	0.0288841	0.200708	0.165795	B4GALNT2	1	46	12	18862	0.0217391	0.0006362	0.0292652
biological_process	GO:0031581	hemidesmosome assembly	1/46	12/18862	0.0288841	0.200708	0.165795	KRT14	1	46	12	18862	0.0217391	0.0006362	0.0292652
biological_process	GO:0043455	regulation of secondary metabolic process	1/46	12/18862	0.0288841	0.200708	0.165795	OPN3	1	46	12	18862	0.0217391	0.0006362	0.0292652
biological_process	GO:0045989	positive regulation of striated muscle contraction	1/46	12/18862	0.0288841	0.200708	0.165795	NPPA	1	46	12	18862	0.0217391	0.0006362	0.0292652
biological_process	GO:0048021	regulation of melanin biosynthetic process	1/46	12/18862	0.0288841	0.200708	0.165795	OPN3	1	46	12	18862	0.0217391	0.0006362	0.0292652
biological_process	GO:0048934	peripheral nervous system neuron differentiation	1/46	12/18862	0.0288841	0.200708	0.165795	POU4F1	1	46	12	18862	0.0217391	0.0006362	0.0292652
biological_process	GO:0048935	peripheral nervous system neuron development	1/46	12/18862	0.0288841	0.200708	0.165795	POU4F1	1	46	12	18862	0.0217391	0.0006362	0.0292652
biological_process	GO:0055012	ventricular cardiac muscle cell differentiation	1/46	12/18862	0.0288841	0.200708	0.165795	NKX2-5	1	46	12	18862	0.0217391	0.0006362	0.0292652
biological_process	GO:0072015	glomerular visceral epithelial cell development	1/46	12/18862	0.0288841	0.200708	0.165795	NPHS2	1	46	12	18862	0.0217391	0.0006362	0.0292652
biological_process	GO:1900376	regulation of secondary metabolite biosynthetic process	1/46	12/18862	0.0288841	0.200708	0.165795	OPN3	1	46	12	18862	0.0217391	0.0006362	0.0292652
biological_process	GO:0070268	cornification	2/46	113/18862	0.0310244	0.20403	0.168539	LIPK/KRT14	2	46	113	18862	0.0434783	0.00599088	0.13779
biological_process	GO:0003161	cardiac conduction system development	1/46	13/18862	0.031254	0.20403	0.168539	NKX2-5	1	46	13	18862	0.0217391	0.000689216	0.031704
biological_process	GO:0007512	adult heart development	1/46	13/18862	0.031254	0.20403	0.168539	NKX2-5	1	46	13	18862	0.0217391	0.000689216	0.031704
biological_process	GO:0016264	gap junction assembly	1/46	13/18862	0.031254	0.20403	0.168539	GJB2	1	46	13	18862	0.0217391	0.000689216	0.031704
biological_process	GO:0060576	intestinal epithelial cell development	1/46	13/18862	0.031254	0.20403	0.168539	NKX3-2	1	46	13	18862	0.0217391	0.000689216	0.031704
biological_process	GO:0072310	glomerular epithelial cell development	1/46	13/18862	0.031254	0.20403	0.168539	NPHS2	1	46	13	18862	0.0217391	0.000689216	0.031704
biological_process	GO:0003231	cardiac ventricle development	2/46	114/18862	0.0315302	0.20403	0.168539	NKX2-5/POU4F1	2	46	114	18862	0.0434783	0.0060439	0.13901
biological_process	GO:0003206	cardiac chamber morphogenesis	2/46	115/18862	0.0320392	0.20403	0.168539	NKX2-5/POU4F1	2	46	115	18862	0.0434783	0.00609691	0.140229
biological_process	GO:0060828	regulation of canonical Wnt signaling pathway	3/46	287/18862	0.0327267	0.20403	0.168539	TLE6/NKX2-5/IGFbiological_process1	3	46	287	18862	0.0652174	0.0152158	0.233309
biological_process	GO:0042752	regulation of circadian rhythm	2/46	118/18862	0.0335858	0.20403	0.168539	OPN3/SOX14	2	46	118	18862	0.0434783	0.00625596	0.143887
biological_process	GO:0036092	phosphatidylinositol-3-phosphate biosynthetic process	1/46	14/18862	0.0336181	0.20403	0.168539	PIK3C2G	1	46	14	18862	0.0217391	0.000742233	0.0341427
biological_process	GO:0070141	response to UV-A	1/46	14/18862	0.0336181	0.20403	0.168539	OPN3	1	46	14	18862	0.0217391	0.000742233	0.0341427
biological_process	GO:1901841	regulation of high voltage-gated calcium channel activity	1/46	14/18862	0.0336181	0.20403	0.168539	NPPA	1	46	14	18862	0.0217391	0.000742233	0.0341427
biological_process	GO:0007368	determination of left/right symmetry	2/46	119/18862	0.0341078	0.20403	0.168539	NKX2-5/NKX3-2	2	46	119	18862	0.0434783	0.00630898	0.145107
biological_process	GO:0048511	rhythmic process	3/46	294/18862	0.0347796	0.20403	0.168539	OPN3/AGRP/SOX14	3	46	294	18862	0.0652174	0.0155869	0.238999
biological_process	GO:0007127	meiosis I	2/46	121/18862	0.0351613	0.20403	0.168539	DMC1/DNMT3L	2	46	121	18862	0.0434783	0.00641501	0.147545
biological_process	GO:0010832	negative regulation of myotube differentiation	1/46	15/18862	0.0359767	0.20403	0.168539	NKX2-5	1	46	15	18862	0.0217391	0.00079525	0.0365815
biological_process	GO:0018298	protein-chromophore linkage	1/46	15/18862	0.0359767	0.20403	0.168539	OPN3	1	46	15	18862	0.0217391	0.00079525	0.0365815
biological_process	GO:0021535	cell migration in hindbrain	1/46	15/18862	0.0359767	0.20403	0.168539	POU4F1	1	46	15	18862	0.0217391	0.00079525	0.0365815
biological_process	GO:0043508	negative regulation of JUN kinase activity	1/46	15/18862	0.0359767	0.20403	0.168539	NPPA	1	46	15	18862	0.0217391	0.00079525	0.0365815
biological_process	GO:0046037	GMP metabolic process	1/46	15/18862	0.0359767	0.20403	0.168539	LRGUK	1	46	15	18862	0.0217391	0.00079525	0.0365815
biological_process	GO:0060413	atrial septum morphogenesis	1/46	15/18862	0.0359767	0.20403	0.168539	NKX2-5	1	46	15	18862	0.0217391	0.00079525	0.0365815
biological_process	GO:0072224	metanephric glomerulus development	1/46	15/18862	0.0359767	0.20403	0.168539	NPHS2	1	46	15	18862	0.0217391	0.00079525	0.0365815
biological_process	GO:1902514	regulation of calcium ion transmembrane transport via high voltage-gated calcium channel	1/46	15/18862	0.0359767	0.20403	0.168539	NPPA	1	46	15	18862	0.0217391	0.00079525	0.0365815
biological_process	GO:1903818	positive regulation of voltage-gated potassium channel activity	1/46	15/18862	0.0359767	0.20403	0.168539	NPPA	1	46	15	18862	0.0217391	0.00079525	0.0365815
biological_process	GO:0030216	keratinocyte differentiation	3/46	302/18862	0.0372065	0.20403	0.168539	OPN3/LIPK/KRT14	3	46	302	18862	0.0652174	0.016011	0.245502
biological_process	GO:0032355	response to estradiol	2/46	125/18862	0.037306	0.20403	0.168539	GJB2/POU4F1	2	46	125	18862	0.0434783	0.00662708	0.152423
biological_process	GO:0007568	aging	3/46	304/18862	0.0378265	0.20403	0.168539	KRT14/IGFbiological_process1/GJB2	3	46	304	18862	0.0652174	0.0161171	0.247128
biological_process	GO:0009855	determination of bilateral symmetry	2/46	126/18862	0.0378499	0.20403	0.168539	NKX2-5/NKX3-2	2	46	126	18862	0.0434783	0.0066801	0.153642
biological_process	GO:0061982	meiosis I cell cycle process	2/46	126/18862	0.0378499	0.20403	0.168539	DMC1/DNMT3L	2	46	126	18862	0.0434783	0.0066801	0.153642
biological_process	GO:0006047	UDP-N-acetylglucosamine metabolic process	1/46	16/18862	0.0383296	0.20403	0.168539	B4GALNT2	1	46	16	18862	0.0217391	0.000848266	0.0390203
biological_process	GO:0006349	regulation of gene expression by genetic imprinting	1/46	16/18862	0.0383296	0.20403	0.168539	DNMT3L	1	46	16	18862	0.0217391	0.000848266	0.0390203
biological_process	GO:0043252	sodium-independent organic anion transport	1/46	16/18862	0.0383296	0.20403	0.168539	SLCO6A1	1	46	16	18862	0.0217391	0.000848266	0.0390203
biological_process	GO:0050884	neuromuscular process controlling posture	1/46	16/18862	0.0383296	0.20403	0.168539	POU4F1	1	46	16	18862	0.0217391	0.000848266	0.0390203
biological_process	GO:0051238	sequestering of metal ion	1/46	16/18862	0.0383296	0.20403	0.168539	SLC30A8	1	46	16	18862	0.0217391	0.000848266	0.0390203
biological_process	GO:0009799	specification of symmetry	2/46	127/18862	0.0383969	0.20403	0.168539	NKX2-5/NKX3-2	2	46	127	18862	0.0434783	0.00673311	0.154862
biological_process	GO:0003085	negative regulation of systemic arterial blood pressure	1/46	17/18862	0.0406768	0.210639	0.173998	NPPA	1	46	17	18862	0.0217391	0.000901283	0.041459
biological_process	GO:0042474	middle ear morphogenesis	1/46	17/18862	0.0406768	0.210639	0.173998	NKX3-2	1	46	17	18862	0.0217391	0.000901283	0.041459
biological_process	GO:0046068	cGMP metabolic process	1/46	17/18862	0.0406768	0.210639	0.173998	NPPA	1	46	17	18862	0.0217391	0.000901283	0.041459
biological_process	GO:0061577	calcium ion transmembrane transport via high voltage-gated calcium channel	1/46	17/18862	0.0406768	0.210639	0.173998	NPPA	1	46	17	18862	0.0217391	0.000901283	0.041459
biological_process	GO:0071482	cellular response to light stimulus	2/46	134/18862	0.0423101	0.213256	0.176161	OPN3/GRK7	2	46	134	18862	0.0434783	0.00710423	0.163397
biological_process	GO:0009416	response to light stimulus	3/46	319/18862	0.0426464	0.213256	0.176161	OPN3/AGRP/GRK7	3	46	319	18862	0.0652174	0.0169123	0.259322
biological_process	GO:0060048	cardiac muscle contraction	2/46	135/18862	0.0428809	0.213256	0.176161	NKX2-5/NPPA	2	46	135	18862	0.0434783	0.00715725	0.164617
biological_process	GO:0007597	blood coagulation, intrinsic pathway	1/46	18/18862	0.0430185	0.213256	0.176161	F9	1	46	18	18862	0.0217391	0.0009543	0.0438978
biological_process	GO:0032785	negative regulation of DNA-templated transcription, elongation	1/46	18/18862	0.0430185	0.213256	0.176161	POU4F1	1	46	18	18862	0.0217391	0.0009543	0.0438978
biological_process	GO:0097623	potassium ion export across plasma membrane	1/46	18/18862	0.0430185	0.213256	0.176161	NPPA	1	46	18	18862	0.0217391	0.0009543	0.0438978
biological_process	GO:2000738	positive regulation of stem cell differentiation	1/46	18/18862	0.0430185	0.213256	0.176161	NKX2-5	1	46	18	18862	0.0217391	0.0009543	0.0438978
biological_process	GO:0010002	cardioblast differentiation	1/46	19/18862	0.0453546	0.221999	0.183383	NKX2-5	1	46	19	18862	0.0217391	0.00100732	0.0463365
biological_process	GO:0043046	DNA methylation involved in gamete generation	1/46	19/18862	0.0453546	0.221999	0.183383	DNMT3L	1	46	19	18862	0.0217391	0.00100732	0.0463365
biological_process	GO:0009581	detection of external stimulus	2/46	142/18862	0.0469575	0.221999	0.183383	OPN3/GRK7	2	46	142	18862	0.0434783	0.00752836	0.173152
biological_process	GO:0060070	canonical Wnt signaling pathway	3/46	333/18862	0.0474118	0.221999	0.183383	TLE6/NKX2-5/IGFbiological_process1	3	46	333	18862	0.0652174	0.0176545	0.270703
biological_process	GO:0003215	cardiac right ventricle morphogenesis	1/46	20/18862	0.0476851	0.221999	0.183383	NKX2-5	1	46	20	18862	0.0217391	0.00106033	0.0487753
biological_process	GO:0043901	negative regulation of multi-organism process	1/46	20/18862	0.0476851	0.221999	0.183383	ZG16	1	46	20	18862	0.0217391	0.00106033	0.0487753
biological_process	GO:0046697	decidualization	1/46	20/18862	0.0476851	0.221999	0.183383	GJB2	1	46	20	18862	0.0217391	0.00106033	0.0487753
biological_process	GO:0061318	renal filtration cell differentiation	1/46	20/18862	0.0476851	0.221999	0.183383	NPHS2	1	46	20	18862	0.0217391	0.00106033	0.0487753
biological_process	GO:0072112	glomerular visceral epithelial cell differentiation	1/46	20/18862	0.0476851	0.221999	0.183383	NPHS2	1	46	20	18862	0.0217391	0.00106033	0.0487753
biological_process	GO:0009582	detection of abiotic stimulus	2/46	145/18862	0.0487468	0.221999	0.183383	OPN3/GRK7	2	46	145	18862	0.0434783	0.00768741	0.176811
biological_process	GO:0016042	lipid catabolic process	3/46	340/18862	0.0498898	0.221999	0.183383	CES3/OC90/LIPK	3	46	340	18862	0.0652174	0.0180257	0.276393
cellular_component	GO:0005796	Golgi lumen	3/50	102/19520	0.00227192	0.129268	0.104153	F9/AGRP/ZG16	3	50	102	19520	0.06	0.00522541	0.0870902
cellular_component	GO:0001669	acrosomal vesicle	3/50	115/19520	0.0031918	0.129268	0.104153	LRGUK/MROH2B/PRSS55	3	50	115	19520	0.06	0.00589139	0.0981899
cellular_component	GO:0070701	mucus layer	1/50	3/19520	0.00766515	0.16536	0.133233	ZG16	1	50	3	19520	0.02	0.000153689	0.00768443
cellular_component	GO:0031225	anchored component of membrane	3/50	170/19520	0.00942599	0.16536	0.133233	LYPD6B/PRSS55/CPO	3	50	170	19520	0.06	0.00870902	0.14515
cellular_component	GO:0106333	subcortical maternal complex	1/50	4/19520	0.0102074	0.16536	0.133233	TLE6	1	50	4	19520	0.02	0.000204918	0.0102459
cellular_component	GO:0031235	intrinsic component of the cytoplasmic side of the plasma membrane	1/50	8/19520	0.0203126	0.184867	0.148951	NPHS2	1	50	8	19520	0.02	0.000409836	0.0204918
cellular_component	GO:0005667	transcription regulator complex	4/50	409/19520	0.0205062	0.184867	0.148951	TLE6/SOX14/NKX2-5/POU4F1	4	50	409	19520	0.08	0.0209529	0.261911
cellular_component	GO:0001750	photoreceptor outer segment	2/50	89/19520	0.0218538	0.184867	0.148951	OPN3/GRK7	2	50	89	19520	0.04	0.00455943	0.113986
cellular_component	GO:0036056	filtration diaphragm	1/50	9/19520	0.0228231	0.184867	0.148951	NPHS2	1	50	9	19520	0.02	0.000461066	0.0230533
cellular_component	GO:0036057	slit diaphragm	1/50	9/19520	0.0228231	0.184867	0.148951	NPHS2	1	50	9	19520	0.02	0.000461066	0.0230533
cellular_component	GO:0042589	zymogen granule membrane	1/50	10/19520	0.0253273	0.185672	0.149599	ZG16	1	50	10	19520	0.02	0.000512295	0.0256148
cellular_component	GO:0042588	zymogen granule	1/50	13/19520	0.0328021	0.185672	0.149599	ZG16	1	50	13	19520	0.02	0.000665984	0.0332992
cellular_component	GO:0043025	neuronal cell body	4/50	474/19520	0.0328694	0.185672	0.149599	AGRP/NRSN2/NPPA/CPNE6	4	50	474	19520	0.08	0.0242828	0.303535
cellular_component	GO:0097733	photoreceptor cell cilium	2/50	115/19520	0.0350789	0.185672	0.149599	OPN3/GRK7	2	50	115	19520	0.04	0.00589139	0.147285
cellular_component	GO:0002177	manchette	1/50	15/19520	0.0377541	0.185672	0.149599	LRGUK	1	50	15	19520	0.02	0.000768443	0.0384221
cellular_component	GO:0035098	ESC/E(Z) complex	1/50	16/19520	0.0402208	0.185672	0.149599	DNMT3L	1	50	16	19520	0.02	0.000819672	0.0409836
cellular_component	GO:0097731	9+0 non-motile cilium	2/50	126/19520	0.0414043	0.185672	0.149599	OPN3/GRK7	2	50	126	19520	0.04	0.00645492	0.161373
cellular_component	GO:0097449	astrocyte projection	1/50	17/19520	0.0426812	0.185672	0.149599	GJB2	1	50	17	19520	0.02	0.000870902	0.0435451
cellular_component	GO:0005788	endoplasmic reticulum lumen	3/50	306/19520	0.0435527	0.185672	0.149599	CES3/F9/IGFbiological_process1	3	50	306	19520	0.06	0.0156762	0.26127
molecular_function	GO:0005184	neuropeptide hormone activity	3/53	30/18337	8.75956e-05	0.0089241	0.00626252	AGRP/PPY/NPPA	3	53	30	18337	0.0566038	0.00163604	0.0289033
molecular_function	GO:0071855	neuropeptide receptor binding	3/53	37/18337	0.000165261	0.0089241	0.00626252	AGRP/PPY/NPPA	3	53	37	18337	0.0566038	0.00201778	0.0356474
molecular_function	GO:0005179	hormone activity	4/53	122/18337	0.000424534	0.0152832	0.0107251	RLN3/AGRP/PPY/NPPA	4	53	122	18337	0.0754717	0.00665321	0.0881551
molecular_function	GO:0000150	recombinase activity	1/53	2/18337	0.00577247	0.0978792	0.0686872	DMC1	1	53	2	18337	0.0188679	0.000109069	0.00578066
molecular_function	GO:0047196	long-chain-alcohol O-fatty-acyltransferase activity	1/53	2/18337	0.00577247	0.0978792	0.0686872	AWAT1	1	53	2	18337	0.0188679	0.000109069	0.00578066
molecular_function	GO:0102966	arachidoyl-CoA:1-dodecanol O-acyltransferase activity	1/53	2/18337	0.00577247	0.0978792	0.0686872	AWAT1	1	53	2	18337	0.0188679	0.000109069	0.00578066
molecular_function	GO:0050254	rhodopsin kinase activity	1/53	3/18337	0.00864643	0.0978792	0.0686872	GRK7	1	53	3	18337	0.0188679	0.000163604	0.00867099
molecular_function	GO:0001664	G protein-coupled receptor binding	4/53	289/18337	0.00965829	0.0978792	0.0686872	RLN3/AGRP/PPY/NPPA	4	53	289	18337	0.0754717	0.0157605	0.208826
molecular_function	GO:0005503	all-trans retinal binding	1/53	4/18337	0.0115122	0.0978792	0.0686872	OPN3	1	53	4	18337	0.0188679	0.000218138	0.0115613
molecular_function	GO:0031841	neuropeptide Y receptor binding	1/53	4/18337	0.0115122	0.0978792	0.0686872	PPY	1	53	4	18337	0.0188679	0.000218138	0.0115613
molecular_function	GO:0070996	type 1 melanocortin receptor binding	1/53	4/18337	0.0115122	0.0978792	0.0686872	AGRP	1	53	4	18337	0.0188679	0.000218138	0.0115613
molecular_function	GO:0080030	methyl indole-3-acetate esterase activity	1/53	4/18337	0.0115122	0.0978792	0.0686872	CES3	1	53	4	18337	0.0188679	0.000218138	0.0115613
molecular_function	GO:0004252	serine-type endopeptidase activity	3/53	168/18337	0.0126584	0.0978792	0.0686872	KLK11/F9/PRSS55	3	53	168	18337	0.0566038	0.0091618	0.161859
molecular_function	GO:0031779	melanocortin receptor binding	1/53	5/18337	0.0143699	0.0978792	0.0686872	AGRP	1	53	5	18337	0.0188679	0.000272673	0.0144517
molecular_function	GO:0008236	serine-type peptidase activity	3/53	186/18337	0.0165967	0.0978792	0.0686872	KLK11/F9/PRSS55	3	53	186	18337	0.0566038	0.0101434	0.179201
molecular_function	GO:0017171	serine hydrolase activity	3/53	188/18337	0.017072	0.0978792	0.0686872	KLK11/F9/PRSS55	3	53	188	18337	0.0566038	0.0102525	0.181127
molecular_function	GO:0005502	11-cis retinal binding	1/53	6/18337	0.0172195	0.0978792	0.0686872	OPN3	1	53	6	18337	0.0188679	0.000327207	0.017342
molecular_function	GO:1903763	gap junction channel activity involved in cell communication by electrical coupling	1/53	6/18337	0.0172195	0.0978792	0.0686872	GJB2	1	53	6	18337	0.0188679	0.000327207	0.017342
molecular_function	GO:1990254	keratin filament binding	1/53	6/18337	0.0172195	0.0978792	0.0686872	KRT14	1	53	6	18337	0.0188679	0.000327207	0.017342
molecular_function	GO:0004703	G protein-coupled receptor kinase activity	1/53	7/18337	0.020061	0.103171	0.0724005	GRK7	1	53	7	18337	0.0188679	0.000381742	0.0202323
molecular_function	GO:0035005	1-phosphatidylinositol-4-phosphate 3-kinase activity	1/53	7/18337	0.020061	0.103171	0.0724005	PIK3C2G	1	53	7	18337	0.0188679	0.000381742	0.0202323
molecular_function	GO:0031995	insulin-like growth factor II binding	1/53	8/18337	0.0228944	0.112391	0.0788707	IGFbiological_process1	1	53	8	18337	0.0188679	0.000436276	0.0231226
molecular_function	GO:0004385	guanylate kinase activity	1/53	9/18337	0.0257198	0.115739	0.0812204	LRGUK	1	53	9	18337	0.0188679	0.000490811	0.026013
molecular_function	GO:0004771	sterol esterase activity	1/53	9/18337	0.0257198	0.115739	0.0812204	CES3	1	53	9	18337	0.0188679	0.000490811	0.026013
molecular_function	GO:0016303	1-phosphatidylinositol-3-kinase activity	1/53	10/18337	0.0285372	0.123281	0.0865127	PIK3C2G	1	53	10	18337	0.0188679	0.000545345	0.0289033
molecular_function	GO:0035004	phosphatidylinositol 3-kinase activity	1/53	12/18337	0.034148	0.137575	0.0965438	PIK3C2G	1	53	12	18337	0.0188679	0.000654415	0.034684
molecular_function	GO:0030548	acetylcholine receptor regulator activity	1/53	13/18337	0.0369414	0.137575	0.0965438	LYPD6B	1	53	13	18337	0.0188679	0.000708949	0.0375743
molecular_function	GO:0031994	insulin-like growth factor I binding	1/53	13/18337	0.0369414	0.137575	0.0965438	IGFbiological_process1	1	53	13	18337	0.0188679	0.000708949	0.0375743
molecular_function	GO:0099602	neurotransmitter receptor regulator activity	1/53	13/18337	0.0369414	0.137575	0.0965438	LYPD6B	1	53	13	18337	0.0188679	0.000708949	0.0375743
molecular_function	GO:0008020	G protein-coupled photoreceptor activity	1/53	15/18337	0.0425046	0.142785	0.1002	OPN3	1	53	15	18337	0.0188679	0.000818018	0.043355
molecular_function	GO:0019215	intermediate filament binding	1/53	15/18337	0.0425046	0.142785	0.1002	KRT14	1	53	15	18337	0.0188679	0.000818018	0.043355
molecular_function	GO:0003697	single-stranded DNA binding	2/53	116/18337	0.0443503	0.142785	0.1002	DMC1/POU4F1	2	53	116	18337	0.0377358	0.00632601	0.167639
molecular_function	GO:0015347	sodium-independent organic anion transmembrane transporter activity	1/53	16/18337	0.0452743	0.142785	0.1002	SLCO6A1	1	53	16	18337	0.0188679	0.000872553	0.0462453
molecular_function	GO:0016307	phosphatidylinositol phosphate kinase activity	1/53	16/18337	0.0452743	0.142785	0.1002	PIK3C2G	1	53	16	18337	0.0188679	0.000872553	0.0462453
molecular_function	GO:0009881	photoreceptor activity	1/53	17/18337	0.0480362	0.142785	0.1002	OPN3	1	53	17	18337	0.0188679	0.000927087	0.0491356
molecular_function	GO:0052742	phosphatidylinositol kinase activity	1/53	17/18337	0.0480362	0.142785	0.1002	PIK3C2G	1	53	17	18337	0.0188679	0.000927087	0.0491356

## Sheet: The top 30 GO terms 
Table S12 Functional enrichment analysis of protein-coding genes co-expressed with lncRNAs.
Term	Count	pvalue	ONTOLOGY
female pregnancy	4	0.000899353	BP
male meiosis I	2	0.00142484	BP
feeding behavior	3	0.00151082	BP
multi-multicellular organism process	4	0.00151968	BP
neuropeptide signaling pathway	3	0.00219702	BP
establishment of animal organ orientation	1	0.00243877	BP
long-day photoperiodism	1	0.00243877	BP
proprioception involved in equilibrioception	1	0.00243877	BP
suppression of symbiont entry into host by host	1	0.00243877	BP
regulation of transcription elongation from RNA polymerase I promoter	1	0.00243877	BP
Golgi lumen	3	0.00227192	CC
acrosomal vesicle	3	0.0031918	CC
mucus layer	1	0.00766515	CC
anchored component of membrane	3	0.00942599	CC
subcortical maternal complex	1	0.0102074	CC
intrinsic component of the cytoplasmic side of the plasma membrane	1	0.0203126	CC
transcription regulator complex	4	0.0205062	CC
photoreceptor outer segment	2	0.0218538	CC
filtration diaphragm	1	0.0228231	CC
slit diaphragm	1	0.0228231	CC
neuropeptide hormone activity	3	8.75956e-05	MF
neuropeptide receptor binding	3	0.000165261	MF
hormone activity	4	0.000424534	MF
recombinase activity	1	0.00577247	MF
long-chain-alcohol O-fatty-acyltransferase activity	1	0.00577247	MF
arachidoyl-CoA:1-dodecanol O-acyltransferase activity	1	0.00577247	MF
rhodopsin kinase activity	1	0.00864643	MF
G protein-coupled receptor binding	4	0.00965829	MF
all-trans retinal binding	1	0.0115122	MF
neuropeptide Y receptor binding	1	0.0115122	MF
