# Supplementary material for: Identification and Characterization of lncRNAs Expression Profile Related to Goat Skeletal Muscle at Different Development Stages
Source: Animals (Basel). 2022 Oct 6;12(19):2683. doi: 10.3390/ani12192683 (PMC9558979; doi:10.3390/ani12192683)
Supplement: Supplementary file 1 [file animals-12-02683-s001.zip › Supplementary TableS10.xlsx]

## Sheet: 1 month VS 9 months trans-KEGG
Table S10 KEGG analysis of protein-coding genes co-expressed with lncRNAs.
ID	Description	GeneRatio	BgRatio	pvalue	p.adjust	qvalue	gene
hsa00562	Inositol phosphate metabolism	44242	109/11060	0.00154897	0.118641	0.0957454	B7ZLY6/O75747
hsa04920	Adipocytokine signaling pathway	44242	111/11060	0.0016041	0.118641	0.0957454	C6SUN5/O00253
hsa05132	Salmonella infection	44270	369/11060	0.00207228	0.118641	0.0957454	B7ZLY6/O75747/Q01449
hsa04070	Phosphatidylinositol signaling system	44242	144/11060	0.00263647	0.118641	0.0957454	B7ZLY6/O75747
hsa04080	Neuroactive ligand-receptor interaction	44270	476/11060	0.00408253	0.144991	0.11701	B2RU28/Q8WXF3/P01298
hsa04926	Relaxin signaling pathway	44242	199/11060	0.00483304	0.144991	0.11701	B2RU28/Q8WXF3
hsa04744	Phototransduction	44211	36/11060	0.00795954	0.204674	0.165175	Q8WTQ7
hsa05143	African trypanosomiasis	44211	51/11060	0.0111701	0.251327	0.202826	P01160
hsa04330	Notch signaling pathway	44211	75/11060	0.0161812	0.323624	0.26117	Q9H808
hsa04923	Regulation of lipolysis in adipocytes	44211	85/11060	0.0182243	0.328038	0.264732	P01160
hsa04924	Renin secretion	44211	100/11060	0.0212405	0.335069	0.270407	P01160
hsa04672	Intestinal immune network for IgA production	44211	110/11060	0.0232194	0.335069	0.270407	Q02223
hsa04610	Complement and coagulation cascades	44211	115/11060	0.0241994	0.335069	0.270407	P00740
hsa04925	Aldosterone synthesis and secretion	44211	152/11060	0.0312596	0.385241	0.310896	P01160
hsa05150	Staphylococcus aureus infection	44211	166/11060	0.0338448	0.385241	0.310896	P02533
hsa04670	Leukocyte transendothelial migration	44211	176/11060	0.0356631	0.385241	0.310896	Q01449
hsa04066	HIF-1 signaling pathway	44211	181/11060	0.0365635	0.385241	0.310896	P01160
hsa04270	Vascular smooth muscle contraction	44211	192/11060	0.0385241	0.385241	0.310896	P01160
hsa04915	Estrogen signaling pathway	44211	214/11060	0.0423629	0.397455	0.320753	P02533
hsa04921	Oxytocin signaling pathway	44211	231/11060	0.0452554	0.397455	0.320753	P01160
