# Supplementary figures and images for: Identification and Characterization of lncRNAs Expression Profile Related to Goat Skeletal Muscle at Different Development Stages
Source: MDPI journal article supplement (doi:10.3390/ani12192683), 2022-10-06

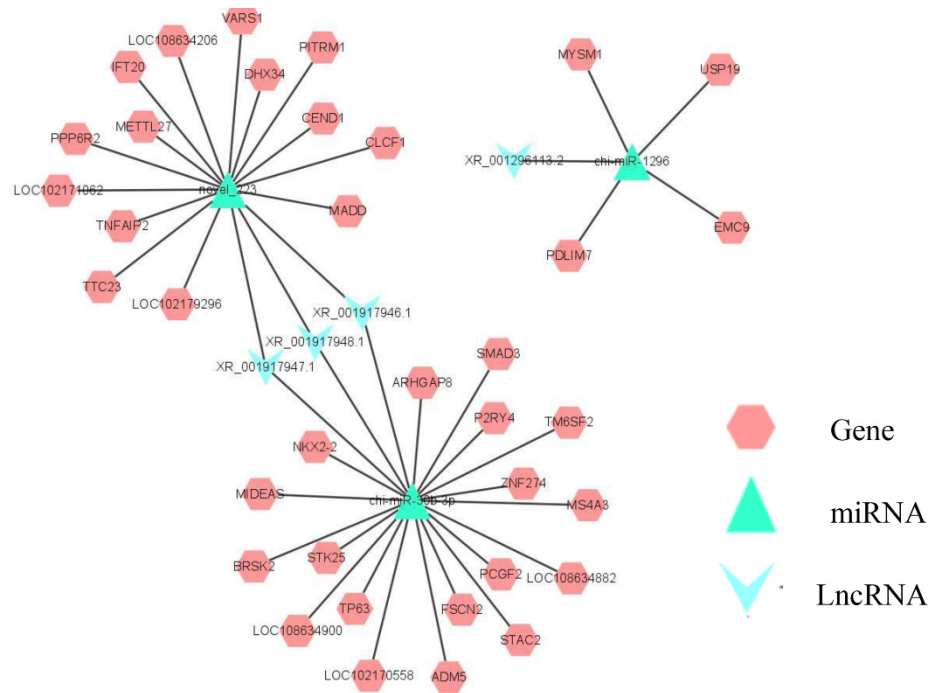

**Figure S2** The lncRNA-miRNA-mRNA ceRNA networks diagram.

Supplement: s1 [file s1]

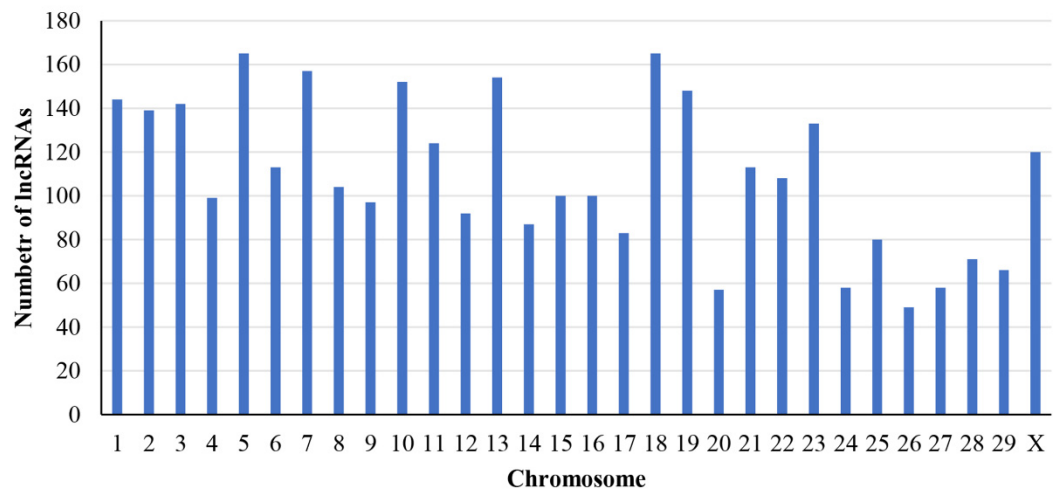

**Figure S1.** Chromosome distribution of lncRNAs identified in goat skeletal muscle.

Supplement: s1 [file s1]
